# Supplementary material for: Transcriptome Analysis Reveals Key Genes and Pathways Associated with the Petal Color Formation in Cabbage (Brassica oleracea L. var. capitata)
Source: Int J Mol Sci. 2022 Jun 15;23(12):6656. doi: 10.3390/ijms23126656 (PMC9224331; doi:10.3390/ijms23126656)
Supplement: Supplementary file 1 [file ijms-23-06656-s001.zip]

Archive with 8 entries (8 files):
- Figure S1.png
- Figure S2.png
- Figure S3.png
- Supplementary Materials.pdf
- Table S1.xlsx
- Table S2.xlsx
- Table S3.xlsx
- Table S4.xlsx
