# Supplementary material for: Transcriptome Analysis Reveals Key Genes and Pathways Associated with the Petal Color Formation in Cabbage (Brassica oleracea L. var. capitata)
Source: Int J Mol Sci. 2022 Jun 15;23(12):6656. doi: 10.3390/ijms23126656 (PMC9224331; doi:10.3390/ijms23126656)
Supplement: Supplementary file 1 [file ijms-23-06656-s001.zip › Supplementary Materials.pdf]

1     **Supplementary Information**

2     **Figure S1.** Distribution of the expression levels of all genes in the six petal samples.

3     **Figure S2.** Volcano plots of DEGs in three comparison groups. The red dots represent significantly up-regulated  
4     DEGs, and the green dots represent significantly down-regulated DEGs.  $|\log_2(\text{fold-change})| > 1$  and  $q\text{-value} < 0.05$   
5     were used as criteria for statistical significance.

6     **Figure S3.** The putative interaction networks of AAO3.

7

8     **Table S1.** Sequences of primer used for qRT–PCR in this study.

9     **Table S2.** Information on 1928 DEGs common in the A192-1 vs. YL-1 and YL-1 vs. YF-2 comparison groups.

10    **Table S3.** Expression patterns of thirty-three homologous genes involved in the carotenoid biosynthetic pathway in  
11    the A192-1 vs. YL-1 and YL-1 vs. YF-2 comparison groups.

12    **Table S4.** Expression patterns of the top 20 significantly differentially expressed TFs in the A192-1 vs. YL-1 and  
13    YL-1 vs. YF-2 comparison groups.
