# Supplementary material for: Transcriptome Analysis Reveals Key Genes and Pathways Associated with the Petal Color Formation in Cabbage (Brassica oleracea L. var. capitata)
Source: Int J Mol Sci. 2022 Jun 15;23(12):6656. doi: 10.3390/ijms23126656 (PMC9224331; doi:10.3390/ijms23126656)
Supplement: Supplementary file 1 [file ijms-23-06656-s001.zip › Table S1.xlsx]

## Sheet: Table S1
Primer name	Forward primer sequence (5′-3′)	Reverse primer sequence (5′-3′)
qRT-BoCCD4	GATCAGTAACCCAAGCGAAAAC	ATCGATGAACGTGTTGATTACG
qRT-BoAAO3	TGCTGGAGACTCGTTGAAGTTA	ATAGTGACGGATGCTCCAATCT
qRT-Bo3g024180	TCCCGATATCTTCTTCTCCAAA	AGAGAGAGAGCGCAATCAGAGT
qRT-Bo2g151880	AAGCCAATAAAGGGTTCTCCTC	TGCTCGCCTTCATAAGTCACTA
