# Supplementary material for: Transcriptome Analysis Reveals Key Genes and Pathways Associated with the Petal Color Formation in Cabbage (Brassica oleracea L. var. capitata)
Source: Int J Mol Sci. 2022 Jun 15;23(12):6656. doi: 10.3390/ijms23126656 (PMC9224331; doi:10.3390/ijms23126656)
Supplement: Supplementary file 1 [file ijms-23-06656-s001.zip › Table S2.xlsx]

## Sheet: Table S2
gene	foldChange（A192_1_vs_YL_1）	log2FoldChange（A192_1_vs_YL_1）	pval（A192_1_vs_YL_1）	padj（A192_1_vs_YL_1）	foldChange（YL_1_vs_YF_2）	log2FoldChange（YL_1_vs_YF_2）	pval（YL_1_vs_YF_2）	padj（YL_1_vs_YF_2）	Chromosome	Start Site	End Site	Direction	Length	Name	GO	KEGG	EC	Description	NCBI_GI	UniProtID
Bo9g163050	Inf	Inf	9.45323e-70	3.19829e-66	0.350640838122885	-1.51193406249131	1.36562e-07	4.00269e-06	C9	47877947	47880445	+	1071	-	GO:0000166;GO:0003824;GO:0003824;GO:0004356;GO:0004356;GO:0004356;GO:0005524;GO:0005524;GO:0006542;GO:0006542;GO:0006807;GO:0006807;GO:0016874;	K01915	EC:6.3.1.2	-	106313232	A0A0D3EF05
Bo6g003310	Inf	Inf	2.7453e-67	6.81128e-64	0.07481785252201	-3.74047363260436	7.93478e-33	2.11972e-29	C6	425788	428141	+	1161	-	GO:0003824;GO:0003824;GO:0004655;GO:0004655;GO:0033014;GO:0033014;GO:0046872;GO:0046872;GO:0046872;	-	-	-	-	-
Bo3g175700	483.11576988440498	8.9162251358229199	4.57403e-66	1.00134e-62	0.190438239302457	-2.39260489926189	4.17377e-16	7.46884e-14	C3	61616732	61618926	-	1134	-	GO:0010181;GO:0010181;GO:0016491;GO:0016491;GO:0055114;GO:0055114;	-	-	-	-	-
Bo7g062260	75.525951355133103	6.2389005467196004	6.05558e-55	6.43898e-52	0.326879389808739	-1.61316967880419	1.35932e-07	3.98735e-06	C7	23246684	23249425	+	1068	-	GO:0008168;GO:0008168;GO:0032259;	-	-	-	-	-
Bo9g175850	135.91633420631999	7.0865750370675196	8.99259e-54	8.82889e-51	0.00829643839879999	-6.9132921538832	1.62359e-77	6.07221e-73	C9	52217382	52217948	+	480	-	GO:0009793;GO:0009793;	-	-	-	106316655	A0A0D3EH90
Bo9g018980	92.473473742530999	6.5309676790200601	5.03596e-50	3.6042e-47	0.376883285358332	-1.40781028148595	1.09711e-06	2.59203e-05	C9	6073102	6074660	-	789	-	GO:0009507;GO:0009570;GO:0009570;	-	-	-	106318942	A0A0D3E2E7
Bo9g137030	Inf	Inf	2.95559e-48	1.8032e-45	0.431718081334699	-1.21183857747454	8.47348e-05	0.00113587	C9	42103017	42104767	-	792	-	GO:0003924;GO:0003924;GO:0005525;GO:0005525;	-	-	-	-	-
Bo6g038320	Inf	Inf	3.54504e-48	2.12794e-45	0.392786414038342	-1.34818306528181	1.06457e-05	0.000191971	C6	9364744	9366057	+	1314	-	GO:0003676;GO:0003676;	-	-	-	-	-
Bo8g108490	105.409690069413	6.7198636864699797	6.42459e-46	3.10516e-43	0.0462080683068826	-4.43571140977755	1.10519e-40	5.90487e-37	C8	38715524	38716874	-	966	-	GO:0016491;GO:0016491;GO:0016491;GO:0046872;GO:0046872;GO:0055114;GO:0055114;GO:0055114;	K05933	EC:1.14.17.4	-	106309653	A0A0D3DXU9
Bo1g054860	75.091192832302397	6.2305718041947404	7.85519e-41	2.92339e-38	0.346043774306631	-1.53097354552096	7.4253e-08	2.3027e-06	C1	15888355	15889220	-	741	-	GO:0030001;GO:0030001;GO:0046872;GO:0046872;	-	-	-	106326459	A0A0D3A7N8
Bo6g087330	Inf	Inf	1.41511e-40	5.16321e-38	0.286966612026924	-1.801045202813	2.39704e-08	8.27023e-07	C6	27599896	27601529	+	831	-	GO:0009058;GO:0009058;GO:0016844;GO:0016844;	-	-	-	-	-
Bo4g198630	35.088326605383799	5.1329192408126501	2.16114e-37	6.33299e-35	0.397635270721576	-1.33048236354485	3.30651e-06	6.89701e-05	C4	53537341	53538530	-	846	-	GO:0003676;GO:0003676;GO:0005777;GO:0005777;GO:0010468;GO:0010468;	-	-	-	106341853	-
Bo01416s010	Inf	Inf	1.3698e-34	3.46792e-32	0.201388912991262	-2.31194383365193	1.9584e-11	1.22687e-09	Scaffold01416	527	1802	-	1104	-	GO:0008168;GO:0008168;GO:0032259;	-	-	-	-	-
Bo7g005440	82.430158167703695	6.3651003580099097	3.81505e-33	8.71048e-31	0.107392965782393	-3.21902859470375	2.55956e-21	1.31134e-18	C7	1537011	1539352	+	939	-	GO:0005506;GO:0005506;GO:0005737;GO:0005737;GO:0019310;GO:0019310;GO:0050113;GO:0050113;GO:0055114;GO:0055114;	K00469	EC:1.13.99.1	-	106302120	A0A0D3D2I8
Bo13090s010	Inf	Inf	1.38618e-32	3.0346e-30	0.390343377678621	-1.35718430086659	2.13945e-05	0.000347138	Scaffold13090	1	474	+	474	-	GO:0005524;GO:0005524;GO:0006457;GO:0006457;GO:0006950;GO:0006950;GO:0051082;GO:0051082;	-	-	-	-	-
Bo7g111810	173.28276163250399	7.4369843304569301	5.96884e-30	1.10516e-27	0.485616215288012	-1.0421114992307	0.00129549	0.0110368	C7	44496141	44497738	-	498	-	GO:0009534;GO:0009535;GO:0009535;	-	-	-	106304085	A0A0D3DGI2
Bo3g048680	108.648941487972	6.7635303089097301	1.40037e-29	2.49361e-27	0.345926295633067	-1.531463410354	2.69417e-06	5.74141e-05	C3	20000523	20002502	-	984	-	-	-	-	-	106328517	A0A0D3B8J8
Bo2g110590	Inf	Inf	3.8067e-29	6.58931e-27	0.360380408287455	-1.47240751224538	0.000155341	0.00190297	C2	33728130	33728819	-	690	-	-	-	-	-	-	-
Bo8g101840	16.365366036663801	4.03257396573163	4.67127e-28	7.4612e-26	0.161758759575944	-2.62808425559324	1.89151e-19	6.93555e-17	C8	35826026	35828069	+	1200	-	GO:0003824;GO:0003824;GO:0004332;GO:0004332;GO:0004332;GO:0006096;GO:0006096;GO:0006096;GO:0009507;GO:0009534;GO:0009534;GO:0009570;GO:0009579;GO:0009941;GO:0009941;GO:0010287;GO:0010287;GO:0016829;GO:0022626;GO:0022626;GO:0031977;GO:0031977;GO:0046686;GO:0046686;GO:0048046;GO:0048046;	K01623	EC:4.1.2.13	-	106312267	A0A0D3DW83
Bo3g021940	34.119526711675299	5.0925257293672797	2.40636e-27	3.64045e-25	0.310012580902059	-1.68960133088231	9.76575e-09	3.60908e-07	C3	7477013	7478491	-	723	-	GO:0005634;GO:0005634;GO:0019760;GO:0019760;GO:0043565;GO:0043565;GO:0046983;GO:0046983;	-	-	-	106328196	A0A0D3B3G5
Bo1g031940	Inf	Inf	4.00146e-27	5.933e-25	2.00863490966558	1.0062153630359	0.00209422	0.0162734	C1	10162499	10163575	+	798	-	-	-	-	-	-	-
Bo4g043680	191.11360050368901	7.57828664041367	4.89236e-27	7.14016e-25	0.26296240897495	-1.9270715168966	4.78272e-08	1.55407e-06	C4	9687539	9688763	+	609	-	GO:0005737;GO:0005737;GO:0120009;GO:0120009;GO:0120013;GO:0120013;	-	-	-	106340868	A0A0D3BSF1
Bo4g021040	14.6067359110444	3.8685619177196	2.07235e-26	2.85646e-24	0.247755207850222	-2.01301271149892	2.4062e-12	1.8107e-10	C4	2794137	2796044	+	1179	-	GO:0000165;GO:0000166;GO:0004672;GO:0004672;GO:0004674;GO:0004707;GO:0004707;GO:0004707;GO:0005524;GO:0005524;GO:0005524;GO:0005622;GO:0005622;GO:0006468;GO:0006468;GO:0016301;GO:0016310;GO:0016740;	K14512	EC:2.7.11.24	-	106342627	A0A0D3BPM4
Bo8g065210	22.9784981128754	4.5222126006209296	2.43214e-26	3.31556e-24	0.482459217371428	-1.05152109941377	0.00598208	0.0369984	C8	20559529	20561088	+	1485	-	GO:0004497;GO:0004497;GO:0005506;GO:0005506;GO:0005783;GO:0006952;GO:0009414;GO:0009617;GO:0009625;GO:0009700;GO:0009737;GO:0010112;GO:0010120;GO:0010298;GO:0016491;GO:0016705;GO:0016705;GO:0020037;GO:0020037;GO:0043231;GO:0046872;GO:0050832;GO:0055114;GO:0055114;GO:0055114;	-	-	-	106308009	A0A0D3DPF7
Bo8g011210	13.1262101999883	3.7143785362591299	9.58223e-26	1.26908e-23	0.408249065185516	-1.29247851260012	5.13217e-06	0.000101234	C8	2098460	2102946	-	1890	-	GO:0008270;GO:0008270;GO:0016491;GO:0016491;GO:0055114;GO:0055114;	K07119	-	-	106307284	A0A0D3DJH0
Bo3g038840	115.041715522855	6.8460132845541999	1.10678e-25	1.45547e-23	0.483980174096519	-1.04698014515293	0.00185535	0.0147544	C3	15372703	15375487	+	1479	-	GO:0004497;GO:0004497;GO:0004497;GO:0005506;GO:0005506;GO:0016020;GO:0016021;GO:0016021;GO:0016491;GO:0016705;GO:0016705;GO:0020037;GO:0020037;GO:0046872;GO:0055114;GO:0055114;GO:0055114;	-	-	-	-	-
Bo8g090620	85.808163672251197	6.4230430051902498	3.23626e-24	3.77557e-22	0.236949655403273	-2.07734753203185	1.16752e-08	4.2767e-07	C8	30441593	30443589	+	1305	-	GO:0003333;GO:0015171;GO:0016020;GO:0016020;GO:0016020;GO:0016021;GO:0016021;GO:0022857;GO:0022857;GO:0055085;GO:0055085;	-	-	-	106307306	A0A0D3DTK9
Bo2g086570	21.024623931596299	4.3940080900468104	5.89427e-24	6.66751e-22	0.482218486543649	-1.05224113508418	0.000603688	0.00591045	C2	24010286	24011932	+	1647	-	GO:0003824;GO:0003824;GO:0008152;GO:0008152;	-	-	-	106327755	A0A0D3AQX5
Bo7g098510	11.654839009960201	3.54285717132873	2.63552e-23	2.81849e-21	0.423274091090087	-1.24033591192394	1.23665e-05	0.00021868	C7	38535568	38537916	+	1377	-	GO:0004497;GO:0004499;GO:0004499;GO:0016491;GO:0050660;GO:0050660;GO:0050661;GO:0050661;GO:0055114;GO:0055114;GO:0055114;	-	-	-	106306966	A0A0D3DDK0
Bo8g091940	11.124651032203801	3.47568817595468	2.86383e-23	3.05387e-21	0.370332539346235	-1.43310677710615	4.49288e-07	1.16447e-05	C8	31203625	31207206	-	2298	-	GO:0003824;GO:0003824;GO:0006979;GO:0006979;GO:0009506;GO:0009506;GO:0034484;GO:0034484;GO:0052692;GO:0052692;GO:0080167;GO:0080167;	K06617	EC:2.4.1.82	-	106311933	A0A0D3DTZ1
Bo9g154870	41.391384471355501	5.3712585999560298	4.52239e-23	4.71443e-21	0.497500067581042	-1.00723137325353	0.000775537	0.00725579	C9	46463825	46466283	+	1650	-	-	-	-	-	106319397	A0A0D3EED1
Bo8g106790	21.973548246502101	4.4576959470929802	5.11137e-23	5.29874e-21	4.50361350603755	2.1710830226117	5.05027e-09	1.98612e-07	C8	37828173	37829120	+	948	-	GO:0003677;GO:0003677;	-	-	-	106307486	A0A0D3DXC9
Bo9g116200	10.021060857088701	3.3249633391736699	3.21533e-22	3.08407e-20	0.386008266735936	-1.37329635037009	9.45954e-07	2.2737e-05	C9	36970723	36976561	-	3630	-	GO:0000166;GO:0003774;GO:0003774;GO:0003774;GO:0003777;GO:0003777;GO:0003779;GO:0005515;GO:0005524;GO:0005524;GO:0005524;GO:0007018;GO:0007018;GO:0008017;GO:0008017;GO:0016459;GO:0016459;GO:0016459;GO:0051015;GO:0051015;	K10357	-	-	106318095	A0A0D3EAY7
Bo6g101010	32.754660059703902	5.0336282707512803	1.04499e-21	9.68236e-20	0.488779151352578	-1.03274534590446	0.00181445	0.0145125	C6	32004204	32005526	-	672	-	GO:0005886;GO:0005886;	-	-	-	106298608	A0A0D3CYE6
Bo9g175450	42.304477626981502	5.4027384652861201	1.55724e-21	1.42394e-19	0.470328245058099	-1.08826012058716	0.000652953	0.00631345	C9	52021168	52025037	-	2727	-	GO:0004601;GO:0004601;GO:0005509;GO:0005509;GO:0005509;GO:0016020;GO:0016020;GO:0016020;GO:0016021;GO:0016021;GO:0016491;GO:0016491;GO:0016491;GO:0031226;GO:0031226;GO:0050664;GO:0050664;GO:0055114;GO:0055114;GO:0055114;GO:0098869;	K13447	-	-	106318706	A0A0D3EH50
Bo4g191750	Inf	Inf	1.91022e-21	1.72132e-19	2.25388230051748	1.17241217882276	0.0012202	0.0105321	C4	51986988	51988735	-	1356	-	GO:0005737;GO:0006629;GO:0006629;GO:0008970;GO:0008970;GO:0008970;GO:0009507;GO:0009507;GO:0009650;GO:0009650;GO:0016787;GO:0071493;GO:0071493;	-	-	-	-	-
Bo6g106480	10.449909485872601	3.38541854103579	2.13185e-21	1.9164e-19	0.273141156662997	-1.87228138041807	7.48449e-11	4.17791e-09	C6	32988082	32993045	+	2229	-	GO:0003824;GO:0003824;GO:0005992;GO:0005992;GO:0008152;GO:0008152;GO:0016020;GO:0016021;GO:0016021;GO:0016491;GO:0016616;GO:0016616;GO:0051287;GO:0051287;GO:0055114;GO:0055114;GO:0055114;	-	-	-	-	-
Bo5g126100	1265.3705265308099	10.3053441822428	4.21263e-21	3.7417e-19	0.24866964049942	-2.00769771187823	0.000110072	0.00142249	C5	38563580	38565430	-	1533	-	GO:0005515;GO:0030246;GO:0030246;GO:0030246;	-	-	-	106295641	A0A0D3CJL9
Bo7g071250	Inf	Inf	4.40737e-21	3.89607e-19	2.12733859640882	1.08904967715501	0.00110862	0.00975191	C7	27123053	27130540	-	5910	-	GO:0005515;GO:0007165;GO:0007165;GO:0016020;GO:0016021;GO:0016021;GO:0043531;GO:0043531;	-	-	-	-	-
Bo8g080060	11.3023460419278	3.49855036060353	7.41995e-21	6.49743e-19	3.28663441676753	1.71661098959466	1.75235e-08	6.20389e-07	C8	26846762	26847434	+	507	-	GO:0004861;GO:0004861;GO:0005634;GO:0005634;GO:0007050;GO:0007050;GO:0071901;	-	-	-	106309862	A0A0D3DRZ8
Bo9g028870	15.211200365643499	3.9270621002331301	9.46798e-21	8.27137e-19	0.420072455395637	-1.25128990503279	3.54978e-05	0.000541221	C9	9906690	9907949	-	948	-	GO:0004252;GO:0004252;GO:0006508;GO:0006508;GO:0006508;GO:0008233;GO:0016020;GO:0016021;GO:0016021;GO:0016021;GO:0016787;	-	-	-	106315494	A0A0D3E3U1
Bo1g057190	Inf	Inf	1.10535e-20	9.61139e-19	2.09964072999462	1.07014248913081	0.00156788	0.0128936	C1	17114218	17115105	-	717	-	GO:0006508;GO:0006508;GO:0008234;GO:0008234;	-	-	-	-	-
Bo5g034370	9.6076348391434401	3.2641813190526898	1.33305e-20	1.15106e-18	0.22855361083164	-2.12939548317468	1.87235e-10	9.75289e-09	C5	11091428	11092649	-	741	-	GO:0005886;GO:0005886;GO:0008643;GO:0016020;GO:0016021;GO:0016021;GO:0016021;GO:0034219;GO:0051119;GO:0051119;	K15382	-	-	106294879	A0A0D3CC31
Bo9g014090	10.277160260475901	3.3613697753634799	1.33713e-20	1.15191e-18	3.07381860400873	1.62003202943378	0.000123816	0.00156708	C9	4164751	4170209	-	2193	-	-	-	-	-	-	-
Bo6g121190	179.01373250657099	7.4839264535726802	2.9114e-20	2.43485e-18	0.302128094936362	-1.72676774815766	5.05114e-06	9.97426e-05	C6	38399197	38400828	-	1632	-	GO:0003824;GO:0003824;GO:0008152;GO:0008152;	-	-	-	106301112	A0A0D3D1C4
Bo4g092830	11.7284639607269	3.5519421754874498	3.74137e-20	3.10109e-18	0.364483523189163	-1.45607449720914	4.97946e-07	1.27731e-05	C4	22855442	22856077	+	636	-	-	-	-	-	106339630	A0A0D3BVQ4
Bo3g036380	16.8610745229862	4.0756245742033297	4.11547e-20	3.38853e-18	0.0634016110049101	-3.97933669074654	9.28468e-29	1.5784e-25	C3	14354887	14356438	+	966	-	-	K06911	-	-	106332173	A0A0D3B6G3
Bo2g043270	Inf	Inf	4.68946e-20	3.8526e-18	2.6563935991967	1.40946892738449	4.13833e-05	0.000621082	C2	11777524	11778433	-	459	-	GO:0004672;GO:0004672;GO:0006468;GO:0006468;GO:0009787;GO:0010100;GO:0016020;GO:0016021;GO:0016021;	-	-	-	-	-
Bo1g005100	175.06363065315	7.45173558578918	8.66999e-20	6.89449e-18	0.456497672094909	-1.13132059166734	0.0024805	0.0186099	C1	1166157	1168600	-	1188	-	GO:0006629;GO:0006629;GO:0006629;GO:0008152;GO:0008152;GO:0016042;GO:0016042;GO:0016787;GO:0016787;	-	-	-	-	-
Bo5g050610	14.980166321480599	3.9049817366975899	8.91454e-20	7.07385e-18	0.464530978240949	-1.10615328586961	0.000304427	0.00332856	C5	16936609	16937704	-	699	-	-	-	-	-	106343401	A0A0D3CDW5
Bo3g134320	11.4312700974103	3.5149138012776402	1.09346e-19	8.54919e-18	0.0862132786217471	-3.53594609857657	6.35477e-28	9.90285e-25	C3	49043578	49047339	-	1761	-	GO:0000166;GO:0004066;GO:0004066;GO:0004066;GO:0005524;GO:0005524;GO:0006529;GO:0006529;GO:0006529;GO:0006541;GO:0006541;GO:0008652;GO:0016874;GO:0070981;	K01953	EC:6.3.5.4	-	106328123	A0A0D3BHR6
Bo2g006620	16.021869010492299	4.00197054818263	2.78764e-19	2.12592e-17	0.475578029119869	-1.07224602827305	0.000555465	0.00553246	C2	969877	971517	+	678	-	GO:0003676;GO:0003676;GO:0003723;GO:0003723;	K14838	-	-	106325646	A0A0D3AHS8
Bo5g001210	9.6431783072152406	3.2695087244980598	3.00265e-19	2.28054e-17	0.145949110575299	-2.77646267591093	1.84924e-20	8.64522e-18	C5	92357	94937	+	2307	-	GO:0004252;GO:0004252;GO:0004252;GO:0005618;GO:0005618;GO:0006508;GO:0006508;GO:0006508;GO:0006508;GO:0008233;GO:0008236;GO:0016787;GO:0031012;GO:0031012;	-	-	-	106295781	A0A0D3C6V1
Bo2g014320	325.26040112931702	8.3454513817454892	7.2312e-19	5.36088e-17	5.67925695009089	2.50570218597229	9.52336e-14	9.94899e-12	C2	4717537	4727093	-	7152	-	GO:0005515;GO:0006952;GO:0007165;GO:0007165;GO:0043531;GO:0043531;	-	-	-	-	-
Bo6g076100	13.1955256945614	3.7219769220069701	7.26304e-19	5.36312e-17	0.460441831583962	-1.11890918522866	0.000332264	0.00357088	C6	22066878	22070493	-	1599	-	GO:0000139;GO:0000139;GO:0005794;GO:0016020;GO:0016021;GO:0016021;GO:0016740;GO:0016757;GO:0016757;GO:0016757;GO:0045489;GO:0045489;GO:0047262;GO:0047262;GO:0071555;GO:0071555;	K20867	EC:2.4.1.-	-	106300752	A0A0D3CUP3
Bo01160s010	Inf	Inf	9.78127e-19	7.12367e-17	2.40458435863475	1.26578754033263	0.00250809	0.0187455	Scaffold01160	4820	6591	-	738	-	GO:0003824;GO:0003824;GO:0008152;GO:0008152;	-	-	-	-	-
Bo2g080870	8.5040167379230507	3.0881444364380202	2.22187e-18	1.58105e-16	0.301567423727792	-1.72944750237061	7.74307e-10	3.49325e-08	C2	22620329	22624431	-	984	-	GO:0009058;GO:0009058;GO:0016844;GO:0016844;	K01757	EC:4.3.3.2	-	106322831	-
Bo6g081560	8.9306813116807309	3.1587702411347398	2.61561e-18	1.85414e-16	0.320022908994094	-1.64375291005858	1.86503e-08	6.55563e-07	C6	25320684	25321811	-	867	-	GO:0005622;GO:0005622;GO:0008270;GO:0008270;	-	-	-	106298396	A0A0D3CVZ0
Bo2g024140	7.6647346955774402	2.9382358558111301	3.80972e-18	2.67408e-16	0.437282058155527	-1.19336393956466	0.01222	0.0642797	C2	6570092	6571390	+	1299	-	GO:0004664;GO:0004664;GO:0008652;GO:0009073;GO:0009094;GO:0009094;GO:0009094;GO:0009507;GO:0009507;GO:0009536;GO:0009570;GO:0009570;GO:0016829;GO:0047769;GO:0047769;GO:0047769;	K05359	-	-	106327879	A0A0D3AKI8
Bo3g185110	292.59931952876798	8.1927826041123204	3.81539e-18	2.67408e-16	2.84441658690443	1.50813277432717	1.22716e-05	0.00021731	C3	64537575	64543792	-	3996	-	GO:0004198;GO:0004198;GO:0005622;GO:0005622;GO:0006508;GO:0006508;GO:0006508;GO:0008233;GO:0008234;GO:0016020;GO:0016021;GO:0016021;GO:0016787;	-	-	-	-	-
Bo1g128590	8.6359354418594005	3.11035245849967	5.16374e-18	3.58533e-16	0.491840079392645	-1.02373879186672	0.000458426	0.00470116	C1	37846605	37849105	-	1287	-	GO:0008375;GO:0008375;GO:0016020;GO:0016020;GO:0016020;GO:0016021;GO:0016021;	-	-	-	106316871	A0A0D3ADG5
Bo6g125570	152.735828284447	7.2548947144194198	6.65702e-18	4.57944e-16	2.13238807900537	1.09247002191811	0.00149416	0.0123855	C6	39682326	39684866	-	540	-	GO:0003676;GO:0003676;GO:0003723;GO:0003723;	-	-	-	-	-
Bo1g133310	8.7711664324818095	3.13276871204951	9.00636e-18	6.13884e-16	0.309897350828888	-1.69013767285243	6.78233e-05	0.00094547	C1	38408340	38410369	-	1104	-	GO:0003824;GO:0003824;GO:0010181;GO:0010181;GO:0016491;GO:0016491;GO:0055114;GO:0055114;	K11517	EC:1.1.3.15	-	106317108	A0A0D3ADP1
Bo7g096910	83.524491312020501	6.3841273860500003	1.13925e-17	7.72285e-16	0.471925470084998	-1.08336905824263	0.00359732	0.0249703	C7	37564897	37567143	+	1623	-	-	-	-	-	106304546	A0A0D3DD40
Bo8g052720	11.075024017332399	3.4692379223041101	1.216e-17	8.22812e-16	0.43012619438754	-1.21716810179994	7.09919e-05	0.000982802	C8	17433634	17434447	+	729	-	GO:0005622;GO:0005622;GO:0008270;GO:0008270;	-	-	-	106308092	A0A0D3DN50
Bo4g124120	9.0241565398404493	3.1737920940324398	1.29874e-17	8.77204e-16	0.391621591549834	-1.35246778662822	3.42048e-06	7.11491e-05	C4	32107092	32107496	+	405	-	-	-	-	-	106340724	A0A0D3BYF5
Bo5g018050	48.733656273450599	5.6068465605880098	1.43207e-17	9.60289e-16	2.18510253746291	1.12770098078689	0.000613177	0.00599238	C5	6179146	6183299	+	2445	-	GO:0016020;GO:0016021;GO:0016021;GO:0016021;	-	-	-	106296003	A0A0D3C9Z1
Bo1g055000	7.1212405803889904	2.83212859277435	1.82736e-17	1.21876e-15	0.437117776561448	-1.19390604452504	1.9116e-05	0.000316485	C1	15988350	15990340	-	1107	-	GO:0006508;GO:0006508;GO:0006508;GO:0008233;GO:0008234;GO:0008234;GO:0008234;GO:0016787;	K01373	EC:3.4.22.41	-	106311642	A0A0D3A7Q2
Bo8g104150	1814.95896571141	10.825721215453999	3.94714e-16	2.34659e-14	0.395214218025533	-1.33929324536874	0.00353471	0.024595	C8	36436484	36442623	+	2778	-	GO:0000166;GO:0003677;GO:0003677;GO:0003689;GO:0003689;GO:0003689;GO:0005524;GO:0005524;GO:0005524;GO:0005634;GO:0005634;GO:0005663;GO:0005663;GO:0006260;GO:0006260;GO:0006260;GO:0006281;GO:0006281;	-	-	-	-	-
Bo8g065220	47.2525807994489	5.56232122220809	7.24518e-16	4.18041e-14	0.262129489178534	-1.93164843103988	1.26001e-06	2.92515e-05	C8	20562981	20565600	+	1341	-	GO:0004553;GO:0004553;GO:0005975;GO:0005975;GO:0008152;GO:0016787;GO:0016798;	-	-	-	-	-
Bo5g010030	12.915526451181099	3.69103454539158	9.0099e-16	5.18257e-14	0.496914073883007	-1.00893169159125	0.0019689	0.0154927	C5	3732197	3736536	+	2880	-	GO:0004672;GO:0004672;GO:0005524;GO:0005524;GO:0006468;GO:0006468;GO:0045492;GO:0045492;	-	-	-	-	-
Bo8g104650	17.5188611324016	4.1308370860341697	9.08443e-16	5.20934e-14	0.295168962729819	-1.76038706613769	7.01902e-07	1.7431e-05	C8	36715924	36717347	+	861	-	GO:0016311;GO:0016791;GO:0016791;	K13248	EC:3.1.3.74	-	106310508	A0A0D3DWR5
Bo9g119020	6.5405508731081401	2.70941215077413	1.01319e-15	5.76556e-14	0.370672987195236	-1.43178111234279	3.50474e-07	9.30285e-06	C9	37709288	37711111	-	1824	-	GO:0000287;GO:0000287;GO:0001666;GO:0001666;GO:0003824;GO:0003824;GO:0005829;GO:0005829;GO:0016831;GO:0016831;GO:0030976;GO:0030976;GO:0046872;	K01568	EC:4.1.1.1	-	106318780	A0A0D3EB71
Bo4g195650	7.3534101327977703	2.8784134527692902	1.56967e-15	8.68006e-14	0.423009401616958	-1.24123836649384	2.0601e-05	0.000336894	C4	52992217	52994660	-	1536	-	GO:0004497;GO:0004497;GO:0005506;GO:0005506;GO:0016491;GO:0016705;GO:0016705;GO:0020037;GO:0020037;GO:0046872;GO:0055114;GO:0055114;GO:0055114;	K20556	-	-	106341810	A0A0D3C6F2
Bo7g011420	7.1568454015669403	2.8393238156471501	2.34824e-15	1.27953e-13	0.280626899829459	-1.83327478803042	3.44677e-05	0.000527237	C7	3767885	3769278	+	660	-	GO:0000287;GO:0000287;GO:0004427;GO:0004427;GO:0005737;GO:0005737;GO:0006796;GO:0006796;	-	-	-	-	-
Bo8g103020	Inf	Inf	2.83192e-15	1.52743e-13	0.427498774138528	-1.22600781184041	0.00365175	0.0252497	C8	36369256	36370525	-	375	-	GO:0009058;GO:0009058;	-	-	-	-	-
Bo3g054850	6.4415820122110397	2.6874150487252599	2.98347e-15	1.60452e-13	0.178679458544528	-2.48455430695081	9.69479e-18	2.35445e-15	C3	21641615	21643761	-	1185	-	GO:0046983;GO:0046983;	-	-	-	106328122	A0A0D3B969
Bo2g158560	6.1498843028092196	2.6205592694220501	3.54052e-15	1.89862e-13	0.165372111708794	-2.59621213541916	1.472e-19	5.50529e-17	C2	49362087	49364198	+	1164	-	GO:0005768;GO:0005768;GO:0005794;GO:0005802;GO:0005802;GO:0009651;GO:0009651;	-	-	-	106327416	A0A0D3AXM2
Bo6g117910	10.4165728823712	3.3808087948772201	4.21005e-15	2.2383e-13	0.302240821248731	-1.72622956795229	7.2956e-08	2.27001e-06	C6	36665935	36667595	-	876	-	GO:0005737;GO:0005737;GO:0006629;GO:0006629;GO:0016020;GO:0016021;GO:0016021;GO:0016021;GO:0016627;GO:0016627;GO:0055114;	-	-	-	106296715	A0A0D3D0E6
Bo5g043200	24.199513915513499	4.59690616392768	5.40199e-15	2.83955e-13	2.90369833417271	1.5378915792292	2.2959e-06	4.99739e-05	C5	14348920	14350284	-	966	-	GO:0003824;GO:0003824;GO:0050662;GO:0050662;	-	-	-	106295564	A0A0D3CD69
Bo3g045710	Inf	Inf	5.86611e-15	3.0662e-13	0.48485967090261	-1.04436083498373	0.0123053	0.0645739	C3	19287865	19289118	+	432	-	GO:0016020;GO:0016021;GO:0016021;GO:0016021;GO:0055085;GO:0055085;	-	-	-	-	-
Bo7g058110	24.870097069055799	4.6363402333538097	6.42368e-15	3.34355e-13	0.39082856401288	-1.35539218322643	0.00264396	0.0195694	C7	21393258	21393797	+	540	-	-	-	-	-	-	-
Bo5g146960	8.2392426083313008	3.04251172388599	6.54544e-15	3.39742e-13	0.439800366145635	-1.18507928961155	8.34645e-05	0.00112246	C5	45464492	45467139	-	912	-	GO:0005515;	-	-	-	106292881	A0A0D3CMR5
Bo9g169330	6.5641429185253202	2.7146066504304001	6.65438e-15	3.44436e-13	0.443690314276682	-1.17237503530037	4.50635e-05	0.000668004	C9	49827472	49829609	+	1125	-	-	-	-	-	106317949	A0A0D3EFY6
Bo6g031000	7.7323568193431003	2.9509082140648002	6.75441e-15	3.49128e-13	0.222459192275464	-2.1683873812861	1.77332e-12	1.38171e-10	C6	7272335	7273477	-	762	-	-	-	-	-	106301008	A0A0D3CQK2
Bo2g127560	6.0729559853911699	2.60239891308919	7.94583e-15	4.07878e-13	0.286338074102362	-1.80420857800259	8.48836e-06	0.00015631	C2	39729329	39731921	+	1074	-	GO:0016788;GO:0016788;	-	-	-	106321573	A0A0D3AUF2
Bo3g064800	Inf	Inf	8.28266e-15	4.24583e-13	2.24621650702337	1.16749699209959	0.00120139	0.0103889	C3	24885821	24886631	-	558	-	GO:0004185;GO:0004185;GO:0006508;GO:0006508;	-	-	-	-	-
Bo7g107170	12.3060236235129	3.6212927620409698	8.59825e-15	4.3955e-13	0.233214529938256	-2.10027041948425	8.197e-10	3.67587e-08	C7	41871669	41873276	+	1608	-	GO:0003824;GO:0003824;GO:0016491;GO:0016491;GO:0016614;GO:0016614;GO:0050660;GO:0050660;GO:0055114;GO:0055114;GO:0071949;	-	-	-	106306540	A0A0D3DF69
Bo8g099020	7.0069659152634696	2.8087898783922101	1.29379e-14	6.51551e-13	0.331898797338097	-1.59118469318283	7.6374e-08	2.36065e-06	C8	34015173	34016460	+	891	-	GO:0005829;GO:0005829;	-	-	-	106307352	A0A0D3DVF1
Bo8g109610	6.2527161016746202	2.6444830146096301	1.32356e-14	6.64745e-13	0.283255903745419	-1.81982206923706	1.99317e-10	1.03104e-08	C8	39329284	39330269	+	684	-	GO:0005515;	K00799	EC:2.5.1.18	-	106308197	A0A0D3DY61
Bo7g063990	Inf	Inf	2.12356e-14	1.03443e-12	3.84222548763681	1.94194218853741	5.9213e-08	1.87994e-06	C7	23866364	23867834	+	678	-	GO:0004869;GO:0004869;GO:0004869;GO:0010466;GO:0010951;GO:0030414;	-	-	-	-	-
Bo4g015880	Inf	Inf	2.32579e-14	1.12704e-12	2.19218583536846	1.13237010322561	0.00181348	0.0145079	C4	2142531	2146028	+	2811	-	GO:0004672;GO:0004672;GO:0005524;GO:0005524;GO:0006468;GO:0006468;	-	-	-	-	-
Bo8g106240	6.4133366607093496	2.68107514177535	2.93919e-14	1.40779e-12	0.351133348386097	-1.50990907426964	1.40703e-07	4.10799e-06	C8	37518867	37519334	+	468	-	GO:0004842;GO:0004842;GO:0009651;GO:0009651;GO:0009789;GO:0009789;GO:0016567;GO:0047484;GO:0047484;	K16282	EC:2.3.2.27	-	106309812	A0A0D3DX74
Bo3g001170	Inf	Inf	3.10154e-14	1.48173e-12	3.22171383075837	1.68782835211985	2.24272e-06	4.90227e-05	C3	77146	80558	+	1311	-	-	-	-	-	-	-
Bo1g139590	142.768669926445	7.1575356096120002	3.2958e-14	1.5685e-12	0.110834905163508	-3.1735157949449	1.61031e-07	4.63988e-06	C1	39985254	39986126	+	873	-	GO:0006629;GO:0006629;GO:0016020;GO:0016021;GO:0016021;GO:0016717;GO:0016717;GO:0055114;GO:0055114;	-	-	-	-	-
Bo7g107290	85.149246261952499	6.4119218541633902	4.17526e-14	1.96692e-12	0.167232884293979	-2.58006953130172	1.18989e-06	2.77789e-05	C7	41921678	41921935	+	258	-	-	-	-	-	-	-
Bo6g022360	212.449240739712	7.7309743774691899	4.60596e-14	2.16707e-12	0.399610461038021	-1.32333374426421	0.00241128	0.018237	C6	4885272	4886953	+	1428	-	GO:0043531;GO:0043531;	-	-	-	-	-
Bo1g051380	5.8464297908457299	2.54755589043886	4.92463e-14	2.30825e-12	0.353267449823954	-1.50116726991849	1.3074e-07	3.85015e-06	C1	14629017	14630613	+	1389	-	-	-	-	-	106310253	A0A0D3A788
Bo1g098150	Inf	Inf	7.45437e-14	3.42074e-12	2.12060394701335	1.08447520218225	0.00376087	0.0258465	C1	28692324	28695256	-	2400	-	GO:0000166;GO:0004672;GO:0004672;GO:0004674;GO:0004674;GO:0004674;GO:0005524;GO:0005524;GO:0005524;GO:0006468;GO:0006468;GO:0016301;GO:0016310;GO:0016740;GO:0048544;GO:0048544;	-	-	-	106313086	A0A0D3AAQ0
Bo7g095570	77.782860382424602	6.2813803842192799	1.01588e-13	4.59379e-12	0.318994376132091	-1.64839710537328	8.14624e-05	0.00110108	C7	36685414	36686463	-	1050	-	GO:0005515;GO:0016020;GO:0016021;GO:0016021;	-	-	-	-	-
Bo8g093020	34.618011935799899	5.1134509700044397	1.18836e-13	5.34778e-12	0.309123444521245	-1.69374501975337	1.11101e-05	0.000199672	C8	31848248	31849171	-	924	-	GO:0004857;GO:0004857;GO:0005618;GO:0005618;GO:0016787;GO:0030599;GO:0030599;GO:0042545;GO:0042545;GO:0043086;GO:0045330;GO:0045330;GO:0045490;GO:0045490;	-	-	-	-	-
Bo6g098980	11.4939057389502	3.5227972177389399	1.79144e-13	7.86206e-12	0.182419140898017	-2.45467097815977	2.23797e-11	1.38806e-09	C6	31294072	31294960	+	699	-	-	-	-	-	106296801	A0A0D3CY42
Bo7g064920	5.6863527590994796	2.50750360095306	2.85245e-13	1.22583e-11	0.247557269517666	-2.01416578023443	3.82604e-12	2.78393e-10	C7	24549385	24554861	+	3597	-	GO:0004553;GO:0004553;GO:0005515;GO:0005975;GO:0005975;	-	-	-	-	-
Bo1g037730	6.41911945060943	2.68237540772658	2.87192e-13	1.23277e-11	0.403206627279964	-1.3104087430898	9.64278e-06	0.000175579	C1	11537178	11538736	-	1146	-	GO:0000062;GO:0000062;	-	-	-	106309330	-
Bo6g081050	5.8463679881513304	2.5475406396079801	3.98988e-13	1.69506e-11	0.424947098163703	-1.23464484414835	2.20747e-05	0.000357091	C6	24931238	24933256	-	1140	-	-	K16280	EC:2.3.2.27	-	106300936	A0A0D3CVT9
Bo2g007260	6.21083576544744	2.6347874187736302	4.21166e-13	1.78317e-11	0.423739997639295	-1.2387487809782	1.25783e-05	0.000221544	C2	1376533	1383074	-	2259	-	GO:0000166;GO:0005524;GO:0005524;GO:0005524;GO:0016020;GO:0016020;GO:0016020;GO:0016021;GO:0016021;GO:0016887;GO:0016887;	-	-	-	106327845	A0A0D3AHZ2
Bo5g052370	11.1864767740866	3.4836838201279101	5.21367e-13	2.18998e-11	0.496235478571025	-1.01090320986118	0.00262441	0.0194593	C5	17496712	17499756	-	2307	-	GO:0004842;GO:0004842;GO:0005488;GO:0005515;GO:0016567;GO:0016567;GO:0016567;GO:0016740;	-	-	-	106344059	A0A0D3CE42
Bo1g051500	Inf	Inf	5.64043e-13	2.3639e-11	2.09229941669587	1.06508932198289	0.00425638	0.0284062	C1	14729708	14731120	-	567	-	GO:0016020;GO:0016021;GO:0016021;	-	-	-	-	-
Bo3g026530	6.0420805985660904	2.5950454290800899	9.05636e-13	3.71191e-11	0.254102502738534	-1.9765175098515	4.06661e-11	2.39137e-09	C3	9749566	9751720	-	1305	-	GO:0006486;GO:0006486;GO:0016757;GO:0016757;	-	-	-	-	-
Bo5g083750	Inf	Inf	9.2695e-13	3.79509e-11	2.06721370859916	1.04768754231865	0.00617744	0.0379613	C5	26925310	26926205	+	420	-	GO:0003677;GO:0003677;	-	-	-	106293025	A0A0D3CGA3
Bo8g074980	5.0937283940784601	2.3487220348059101	1.06182e-12	4.32312e-11	0.436330052084338	-1.19650825261933	1.97048e-05	0.000325225	C8	24125915	24128474	-	1614	-	GO:0008152;GO:0008152;GO:0016491;GO:0016491;GO:0016491;GO:0016620;GO:0016620;GO:0055114;GO:0055114;GO:0055114;	K00128	EC:1.2.1.3	-	106312040	-
Bo9g123560	17.108709756279701	4.0966590587822296	1.14446e-12	4.63966e-11	0.498367914032069	-1.00471690725762	0.00569141	0.0356787	C9	39098653	39099556	-	267	-	-	-	-	-	-	-
Bo5g145390	5.3907565983045496	2.43048777094047	1.41867e-12	5.69548e-11	0.487951116572155	-1.0351914704832	0.000299087	0.00328996	C5	45069723	45070634	+	618	-	-	-	-	-	106292587	A0A0D3CMK7
Bo5g076410	8.3146800021206797	3.0556607411749401	1.63017e-12	6.49553e-11	0.14590597115057	-2.77688916863609	3.69542e-19	1.18127e-16	C5	25158932	25160661	-	1572	-	-	-	-	-	106292971	A0A0D3CFW3
Bo4g188710	5.3238060110711301	2.4124580032624801	1.92122e-12	7.56613e-11	0.467751003158839	-1.0961873473524	0.000131041	0.00164461	C4	50795538	50797808	-	1017	-	GO:0016020;GO:0016021;GO:0016021;	K13354	-	-	106337371	A0A0D3C5A5
Bo2g080710	10.8715458681201	3.4424851923548401	1.9701e-12	7.74227e-11	0.354472489761869	-1.49625442912692	1.3705e-05	0.000238182	C2	22467750	22468875	-	1086	-	GO:0005515;	-	-	-	-	-
Bo3g068040	8.0594053736595495	3.0106734000288502	2.16998e-12	8.50084e-11	0.438021917908305	-1.19092503312832	5.37408e-05	0.000774829	C3	26491620	26494270	+	843	-	GO:0016020;GO:0016021;GO:0016021;	-	-	-	106328707	A0A0D3BBJ3
Bo7g109750	25.391248267745699	4.6662594164351701	3.26264e-12	1.25566e-10	0.179557927313699	-2.47747874684888	1.20162e-07	3.55261e-06	C7	43477686	43479181	-	1221	-	GO:0016829;GO:0030570;GO:0030570;GO:0045490;GO:0045490;GO:0046872;GO:0046872;	K01728	EC:4.2.2.2	-	106301626	A0A0D3DFX6
Bo4g133230	Inf	Inf	3.85564e-12	1.4642e-10	0.251378087192717	-1.99206920040438	5.44077e-05	0.000782936	C4	34195887	34197549	+	765	-	GO:0004672;GO:0004672;GO:0005524;GO:0005524;GO:0006468;GO:0006468;	-	-	-	-	-
Bo2g026710	45.089846094053698	5.4947306804954303	4.04315e-12	1.52761e-10	0.398283811633746	-1.32813125277086	0.00437493	0.0290626	C2	7873650	7875135	+	795	-	GO:0008152;GO:0008152;GO:0016787;GO:0016787;	K07025	-	-	106322978	A0A0D3AKZ6
Bo2g139010	484.91728499137702	8.9215948696316598	4.54633e-12	1.70389e-10	0.194929435354851	-2.3589761334142	0.000730643	0.00690401	C2	44869427	44874284	-	2871	-	GO:0005506;GO:0005506;GO:0016020;GO:0016021;GO:0016021;GO:0016705;GO:0016705;GO:0020037;GO:0020037;GO:0055114;GO:0055114;	-	-	-	-	-
Bo8g001020	135.94838140478399	7.0869151645784196	7.50851e-12	2.76396e-10	0.0271773828636189	-5.20144965609292	1.04375e-11	6.89687e-10	C8	18971	20436	-	1170	-	GO:0005337;GO:0005337;GO:0016020;GO:0016021;GO:0016021;GO:0016021;GO:1901642;GO:1901642;	K15014	-	-	106312000	A0A0D3DIJ4
Bo8g117510	13.6259978530385	3.7682899794497202	1.04326e-11	3.78789e-10	0.288405543282777	-1.79382920080198	3.68698e-07	9.73822e-06	C8	41311895	41313709	+	864	-	GO:0046983;GO:0046983;	-	-	-	-	-
Bo2g053880	50.460798936989903	5.65709114332026	1.07659e-11	3.89752e-10	0.392996701265836	-1.34741089204061	0.00275368	0.0202333	C2	15324783	15326209	+	1056	-	GO:0008168;GO:0008168;GO:0032259;	-	-	-	106322877	A0A0D3AND2
Bo3g055880	Inf	Inf	1.09404e-11	3.953e-10	0.331180110772336	-1.59431206139711	0.000999323	0.00895631	C3	22105005	22109090	-	2490	-	GO:0005216;GO:0005216;GO:0005244;GO:0005249;GO:0005249;GO:0005267;GO:0005515;GO:0006811;GO:0006811;GO:0006811;GO:0006813;GO:0006813;GO:0006813;GO:0016020;GO:0016020;GO:0016020;GO:0016021;GO:0016021;GO:0034765;GO:0034765;GO:0055085;GO:0055085;GO:0071805;	K21867	-	-	106328624	A0A0D3B9H2
Bo4g076980	11.4663833846462	3.51933851712139	1.09811e-11	3.96092e-10	0.234884573762905	-2.08997612860647	2.1035e-08	7.35931e-07	C4	16750464	16752997	+	288	-	-	-	-	-	-	-
Bo7g098190	238.73922092835599	7.8992917867377201	1.27201e-11	4.56499e-10	0.471792997969324	-1.08377408764931	0.0205379	0.0954301	C7	38353193	38356418	-	726	-	GO:0000977;GO:0000977;GO:0003677;GO:0003677;GO:0003677;GO:0003700;GO:0003700;GO:0005634;GO:0005634;GO:0005634;GO:0006351;GO:0006351;GO:0006355;GO:0006355;GO:0006355;GO:0045944;GO:0045944;GO:0046983;GO:0046983;	K09264	-	-	106302265	A0A0D3DDG8
Bo9g130620	5.5757846763037602	2.47917484879118	1.31508e-11	4.70596e-10	0.379287909841956	-1.39863470978051	3.09759e-06	6.51941e-05	C9	40145005	40147427	+	1599	-	GO:0016020;GO:0016021;GO:0016021;GO:0016117;GO:0016117;GO:0016705;GO:0016705;GO:0055114;	K06444	EC:5.5.1.18	-	106313003	A0A0D3EBZ0
Bo5g030690	6.9026012434861697	2.7871401436107699	1.89226e-11	6.66877e-10	0.274441007470742	-1.86543202717231	1.15168e-08	4.23111e-07	C5	10529776	10532569	-	2157	-	GO:0005215;GO:0005215;GO:0016020;GO:0016020;GO:0016020;GO:0016021;GO:0016021;GO:0016021;GO:0022857;GO:0022857;GO:0055085;GO:0055085;	-	-	-	106295205	A0A0D3CBW0
Bo7g005280	Inf	Inf	2.22972e-11	7.78437e-10	2.11101442682321	1.0779364381996	0.0121669	0.0640634	C7	1301443	1302356	-	462	-	GO:0005506;GO:0005506;GO:0016226;GO:0016226;GO:0051536;GO:0051536;	-	-	-	-	-
Bo6g095590	5.8152132788219699	2.5398321049669699	2.29528e-11	8.00572e-10	0.479109830474721	-1.06157167959775	0.000390681	0.004094	C6	29973234	29975238	+	864	-	GO:0003677;GO:0003700;GO:0003700;GO:0005634;GO:0005634;GO:0006351;GO:0006351;GO:0006355;GO:0006355;GO:0006355;GO:0043565;GO:0043565;	-	-	-	106296973	A0A0D3CXQ1
Bo1g091760	5.0200077126161204	2.3276895806988498	2.36488e-11	8.24076e-10	0.11829482679507	-3.07954111098386	5.16428e-24	4.10945e-21	C1	27241724	27243754	+	2031	-	GO:0004842;GO:0004842;GO:0005488;GO:0005515;GO:0016567;GO:0016567;GO:0016567;GO:0016740;	-	-	-	-	-
Bo3g101220	13.702589189167799	3.77637662000277	2.5969e-11	8.99036e-10	0.433940081897823	-1.20443224465223	0.000942767	0.00850856	C3	36240287	36241880	-	756	-	GO:0003677;GO:0003677;GO:0003677;GO:0005634;GO:0005634;GO:0006351;GO:0006351;GO:0006355;GO:0006355;GO:0006355;	-	-	-	-	-
Bo5g020810	6.1123519824864303	2.6117276239964302	2.70555e-11	9.34911e-10	0.426197597496506	-1.23040563430932	0.0285409	0.122412	C5	7221148	7222026	+	525	-	-	-	-	-	106292708	A0A0D3CAG7
Bo4g036190	4.5014060644429401	2.1703757137423598	2.72742e-11	9.4072e-10	0.101232309644015	-3.30425827596357	9.91655e-30	1.8544e-26	C4	7882587	7885405	-	1953	-	GO:0003677;GO:0003677;GO:0003677;GO:0005634;GO:0005634;GO:0006355;GO:0006355;	-	-	-	106342326	-
Bo3g018060	7.2041426082915097	2.8488267401335001	3.94802e-11	1.33572e-09	0.228831001992338	-2.1276455734061	4.95104e-08	1.60458e-06	C3	5969327	5971029	+	1101	-	GO:0016491;GO:0016491;GO:0016491;GO:0046872;GO:0046872;GO:0055114;GO:0055114;GO:0055114;	-	-	-	106335606	A0A0D3B2M6
Bo5g052340	4.5566399967417404	2.1879703930689902	5.27975e-11	1.75753e-09	0.412799251869339	-1.27648773877099	7.98552e-06	0.000148365	C5	17476807	17479246	+	1329	-	GO:0005488;	-	-	-	106295201	A0A0D3CE39
Bo4g014720	Inf	Inf	5.66922e-11	1.88044e-09	0.391453641587927	-1.35308663031174	0.00590634	0.0366452	C4	2046602	2047114	-	417	-	-	-	-	-	106340745	A0A0D3BP87
Bo2g133530	9.6312636156785008	3.2677250911610201	6.11907e-11	2.02785e-09	0.311889047072533	-1.68089520588674	8.90499e-07	2.16264e-05	C2	41496313	41496870	+	558	-	GO:0003712;GO:0003712;GO:0005634;GO:0005634;GO:0006355;GO:0006355;GO:0043565;GO:0043565;GO:0046982;GO:0046982;GO:0048574;GO:0048574;	K08065	-	-	106326978	A0A0D3AV03
Bo8g102450	Inf	Inf	7.30794e-11	2.39835e-09	2.09677522026433	1.06817220907799	0.00634248	0.038728	C8	36107640	36108146	+	282	-	GO:0008641;GO:0008641;GO:0019781;GO:0019781;GO:0045116;GO:0045116;	-	-	-	106311327	A0A0D3DWE4
Bo9g152080	4.3383526494770601	2.11714732939868	7.92586e-11	2.59656e-09	0.400160957208575	-1.32134768124022	1.95965e-06	4.37037e-05	C9	45336028	45337846	-	447	-	GO:0000977;GO:0000977;GO:0003677;GO:0003677;GO:0003677;GO:0003700;GO:0003700;GO:0005634;GO:0005634;GO:0005634;GO:0006351;GO:0006351;GO:0006355;GO:0006355;GO:0006355;GO:0045944;GO:0045944;GO:0046983;GO:0046983;	-	-	-	-	-
Bo2g138480	4.4437501585369796	2.1517777062022101	8.80426e-11	2.86416e-09	0.419459459570584	-1.25339671283434	8.41539e-06	0.000155272	C2	44321248	44322411	+	1164	-	-	-	-	-	106323004	A0A0D3AVV0
Bo7g063700	16.118249607176999	4.0106231749716397	9.33335e-11	3.02606e-09	0.392310570297871	-1.34993188740793	0.0119601	0.0632414	C7	23658585	23661315	-	2100	-	GO:0004842;GO:0004842;GO:0005488;GO:0005515;GO:0016567;GO:0016567;GO:0016567;GO:0016740;	-	-	-	-	-
Bo5g043700	152.91647478114399	7.2566000366608696	9.34259e-11	3.02606e-09	2.01785962925525	1.01282581804141	0.00957427	0.0531194	C5	14863449	14864202	-	351	-	-	-	-	-	-	-
Bo1g157400	4.3766103542858499	2.1298139478421301	9.79136e-11	3.15691e-09	0.374343229942752	-1.4175664315741	4.95901e-07	1.27294e-05	C1	43395540	43397130	-	1461	-	GO:0004616;GO:0004616;GO:0004616;GO:0006098;GO:0006098;GO:0006098;GO:0016491;GO:0016491;GO:0016491;GO:0019521;GO:0019521;GO:0050661;GO:0055114;GO:0055114;GO:0055114;	K00033	-	-	106340355	A0A0D3AG16
Bo8g099030	5.2686972941366896	2.3974462940038599	1.02108e-10	3.2844e-09	0.217666135592494	-2.19981112380164	1.25492e-12	1.01809e-10	C8	34018381	34019791	+	1179	-	GO:0003824;GO:0003824;GO:0004721;GO:0004722;GO:0004722;GO:0005634;GO:0005634;GO:0005829;GO:0005829;GO:0006470;GO:0006470;GO:0016787;GO:0043169;GO:0043169;GO:0046872;GO:0046872;GO:0050688;GO:0050688;	K14803	EC:3.1.3.16	-	106307592	A0A0D3DVF2
Bo6g099700	9.7241301094018002	3.2815691968356799	1.2816e-10	4.07309e-09	0.353895600986454	-1.49860426608402	2.8826e-05	0.000450639	C6	31755548	31756819	+	1092	-	GO:0006508;GO:0006508;GO:0008234;GO:0008234;GO:0016491;GO:0016491;GO:0055114;	-	-	-	-	-
Bo7g050050	38.886461019181198	5.2811960387775398	1.34407e-10	4.2571e-09	2.40349427618154	1.26513336776358	0.0005674	0.00562289	C7	18342197	18343237	-	486	-	GO:0016020;GO:0016021;GO:0016021;	-	-	-	-	-
Bo6g065070	5.9954733581567599	2.5838736626479699	1.48741e-10	4.67926e-09	0.290882124404743	-1.78149345374313	2.92497e-08	9.89093e-07	C6	17411020	17412269	-	432	-	GO:0000166;GO:0005524;GO:0005524;GO:0016740;GO:0016740;	-	-	-	-	-
Bo4g183430	Inf	Inf	1.5168e-10	4.76365e-09	5.8143565976728	2.53961955546412	6.3607e-10	2.94783e-08	C4	48723309	48725904	-	1011	-	GO:0004672;GO:0004672;GO:0005524;GO:0005524;GO:0006468;GO:0030244;GO:0030244;	-	-	-	-	-
Bo8g088450	4.2349605186163597	2.0823485197671801	1.53798e-10	4.82374e-09	0.326694371537167	-1.61398649540788	9.67472e-09	3.57898e-07	C8	29608140	29610392	-	2127	-	GO:0000166;GO:0005524;GO:0005524;GO:0005524;GO:0016020;GO:0016020;GO:0016020;GO:0016021;GO:0016021;GO:0016887;GO:0016887;	-	-	-	106311891	A0A0D3DT91
Bo3g142990	17.1348015640813	4.0988575791766904	1.62874e-10	5.09373e-09	3.22626374648763	1.68986438337768	9.23676e-07	2.23306e-05	C3	51373790	51374128	+	339	-	-	-	-	-	106332034	A0A0D3BII9
Bo8g004520	8.3509880516096509	3.0619469009192901	1.78285e-10	5.54771e-09	0.266882072428009	-1.90572569794208	9.12912e-08	2.77785e-06	C8	948844	954502	-	1476	-	GO:0016020;GO:0016021;GO:0016021;	-	-	-	106310274	A0A0D3DIZ6
Bo3g023280	4.2456267441772297	2.0859775417579498	1.82835e-10	5.67979e-09	0.367127910341174	-1.44564529758372	2.85017e-07	7.74209e-06	C3	8383481	8384545	-	1065	-	GO:0005515;GO:0010114;GO:0010114;GO:0010218;GO:0010218;GO:0010224;GO:0010224;GO:0043496;GO:0043496;	-	-	-	-	-
Bo9g008240	4.2620107568203096	2.0915342343199899	1.92843e-10	5.96579e-09	0.499898037782614	-1.0002942307722	0.000366208	0.00386685	C9	1919083	1920279	-	846	-	GO:0005739;GO:0005743;GO:0005743;GO:0006099;GO:0006099;GO:0006099;GO:0008177;GO:0008177;GO:0009055;GO:0009055;GO:0016491;GO:0016491;GO:0022900;GO:0046872;GO:0046872;GO:0051536;GO:0051536;GO:0051536;GO:0051537;GO:0051537;GO:0051537;GO:0051538;GO:0051538;GO:0051539;GO:0051539;GO:0055114;GO:0055114;	K00235	EC:1.3.5.1	-	106318305	A0A0D3E0G9
Bo9g004390	Inf	Inf	1.94817e-10	6.01686e-09	0.186297422562582	-2.42432038025302	1.37376e-05	0.000238638	C9	851762	852025	+	264	-	GO:0016020;GO:0016021;GO:0016021;	-	-	-	-	-
Bo01074s050	9.2139813071237207	3.2038246710756999	1.99194e-10	6.13675e-09	0.293537923684319	-1.768381190268	6.08662e-07	1.52983e-05	Scaffold01074	23458	24694	+	807	-	GO:0008643;GO:0016020;GO:0016021;GO:0016021;GO:0016021;GO:0034219;GO:0051119;GO:0051119;	-	-	-	-	-
Bo3g149680	5.2310016776630501	2.3870872327105701	2.7874e-10	8.48209e-09	0.422589759009584	-1.24267028929248	3.4402e-05	0.000526446	C3	53379788	53381217	+	543	-	GO:0005622;GO:0005622;GO:0008270;GO:0008270;	-	-	-	106332390	A0A0D3BJB2
Bo3g064680	18.1607843443105	4.1827546072745099	3.24796e-10	9.80342e-09	0.103707759782201	-3.26940424914062	6.75431e-12	4.69538e-10	C3	24814815	24815345	+	405	-	GO:0006950;GO:0006950;	-	-	-	-	-
Bo8g065160	6.7511441997064496	2.7551320342152401	3.60757e-10	1.08274e-08	0.118303714136038	-3.07943272719842	4.31596e-17	9.33045e-15	C8	20510139	20511740	+	1509	-	GO:0004497;GO:0004497;GO:0005506;GO:0005506;GO:0016491;GO:0016705;GO:0016705;GO:0020037;GO:0020037;GO:0046872;GO:0055114;GO:0055114;GO:0055114;	-	-	-	106308141	A0A0D3DPF2
Bo6g119560	Inf	Inf	3.68456e-10	1.10406e-08	2.30388171046879	1.20406664555582	0.00475327	0.0310032	C6	37460090	37461826	-	1044	-	GO:0004672;GO:0004672;GO:0004713;GO:0004713;GO:0005524;GO:0005524;GO:0006468;GO:0006468;GO:0018108;	-	-	-	-	-
Bo2g025430	104.899039750838	6.7128576612738398	3.79109e-10	1.13052e-08	0.33515944319936	-1.57708051218409	0.00503504	0.0324115	C2	7704243	7705019	+	777	-	GO:0003723;GO:0003723;GO:0005488;	-	-	-	-	-
Bo8g012900	4.0781456814719599	2.0279133129178102	3.83299e-10	1.1421e-08	0.462933455717962	-1.11112326642418	6.0407e-05	0.000854794	C8	2742093	2742386	-	294	-	GO:0006869;GO:0006869;	-	-	-	106307924	A0A0D3DJP0
Bo1g083550	Inf	Inf	4.64955e-10	1.37441e-08	0.272318277139711	-1.87663428013722	0.000482272	0.00491305	C1	24209332	24210614	-	363	-	-	-	-	-	-	-
Bo9g159740	5.9087083785640298	2.5628427971551901	4.80021e-10	1.41557e-08	0.497675433222191	-1.0067229219437	0.00156781	0.0128936	C9	47066516	47071251	+	3402	-	GO:0005515;GO:0007165;GO:0007165;GO:0043531;GO:0043531;	-	-	-	-	-
Bo4g186890	28.8028598913113	4.8481401616302504	5.1334e-10	1.51024e-08	0.31888966363172	-1.64887075950771	0.000595326	0.00584695	C4	49732956	49734136	+	930	-	GO:0030001;GO:0030001;GO:0046872;GO:0046872;GO:0046872;	-	-	-	106342421	A0A0D3C4S3
Bo9g057190	14.5497772845713	3.8629251646598499	5.5444e-10	1.62473e-08	0.347055721057714	-1.52676078355368	0.000125654	0.00158828	C9	16784558	16787167	-	2610	-	GO:0000166;GO:0004672;GO:0004672;GO:0004674;GO:0004674;GO:0004674;GO:0005524;GO:0005524;GO:0005524;GO:0006468;GO:0006468;GO:0016020;GO:0016021;GO:0016021;GO:0016301;GO:0016310;GO:0016740;	-	-	-	106317606	A0A0D3E5Z4
Bo2g110350	166.33134956746599	7.3779162982859701	5.8604e-10	1.70925e-08	0.411762630244848	-1.28011519159719	0.0228472	0.103348	C2	33180860	33185300	+	906	-	GO:0015267;GO:0015267;GO:0016020;GO:0016020;GO:0016020;GO:0016021;GO:0016021;GO:0055085;GO:0055085;	K09874	-	-	106322762	A0A0D3AT68
Bo3g053000	4.3080857212150496	2.1070469565537699	6.26115e-10	1.82185e-08	0.493033418347678	-1.0202426575124	0.000366214	0.00386685	C3	20999794	21003707	-	2676	-	GO:0000166;GO:0000166;GO:0006812;GO:0006812;GO:0016020;GO:0016021;GO:0016021;GO:0016021;GO:0016787;GO:0019829;GO:0019829;GO:0030001;GO:0030001;GO:0046872;GO:0046872;GO:0046872;GO:0099132;	-	-	-	-	-
Bo1g008330	4.1696937711809703	2.0599414337847501	7.39396e-10	2.13922e-08	0.306042540749162	-1.70819588947883	2.58744e-09	1.07642e-07	C1	2933037	2934870	-	927	-	GO:0003824;GO:0003824;	-	-	-	106342287	A0A0D3A2A7
Bo7g005770	6.8418176904870602	2.7743796620516701	7.39784e-10	2.13922e-08	0.411956865385052	-1.27943480930633	3.66325e-05	0.000556706	C7	1830395	1834643	+	1461	-	GO:0003824;GO:0003824;GO:0009690;GO:0009690;GO:0016491;GO:0016491;GO:0016614;GO:0016614;GO:0019139;GO:0019139;GO:0050660;GO:0050660;GO:0055114;GO:0055114;	-	-	-	-	-
Bo3g162180	5.9594622652090603	2.5751821591579702	9.65622e-10	2.74955e-08	0.447572135551995	-1.15980787347986	0.000266517	0.00299602	C3	57134346	57135245	+	900	-	GO:0003924;GO:0003924;GO:0005525;GO:0005525;	-	-	-	-	-
Bo2g149480	3.9646187962263602	1.9871821554039799	1.04149e-09	2.95201e-08	0.411441951255361	-1.28123919411527	5.19201e-06	0.000102201	C2	46829985	46832131	-	1383	-	GO:0016020;GO:0016021;GO:0016021;	K14207	-	-	106327220	A0A0D3AWQ8
Bo5g002610	Inf	Inf	1.21917e-09	3.42436e-08	0.215354294561389	-2.21521600102368	9.69334e-05	0.00127159	C5	345042	346048	-	936	-	GO:0016020;GO:0016021;GO:0016021;	-	-	-	-	-
Bo4g092570	Inf	Inf	1.28807e-09	3.61349e-08	0.346437775106965	-1.5293318467275	0.00376424	0.0258601	C4	22591525	22593029	+	756	-	-	-	-	-	-	-
Bo04166s010	13.2990582239551	3.7332521794306199	1.32133e-09	3.69733e-08	2.08685354471593	1.06132935577995	0.0022549	0.0173133	Scaffold04166	554	751	-	198	-	-	-	-	-	-	-
Bo9g027890	13.615469141728999	3.7671747883807298	1.41959e-09	3.95742e-08	0.385748341523395	-1.37426814076437	0.000632983	0.00615377	C9	8985562	8988282	-	1212	-	GO:0003779;GO:0003779;GO:0003779;GO:0005856;GO:0005856;GO:0016491;GO:0016491;GO:0055114;	-	-	-	-	-
Bo01800s010	Inf	Inf	1.58718e-09	4.4081e-08	0.421586035148467	-1.2461010157579	0.0133717	0.0689515	Scaffold01800	296	1189	+	894	-	-	-	-	-	-	-
Bo9g028400	Inf	Inf	1.70322e-09	4.69534e-08	2.10141463154021	1.07136084923069	0.0120113	0.0634139	C9	9362484	9363575	-	297	-	-	-	-	-	-	-
Bo4g044220	34.3324846279695	5.1015023632148804	1.9101e-09	5.23463e-08	0.0961145872351711	-3.37910078546899	7.64618e-10	3.45789e-08	C4	10176445	10178880	-	2436	-	GO:0005515;	-	-	-	106342536	A0A0D3BSK5
Bo8g058650	4.4068465624365203	2.13974666574047	1.96286e-09	5.36341e-08	0.182638099106393	-2.45294034567451	1.02892e-15	1.67312e-13	C8	18971287	18972029	+	663	-	GO:0005576;GO:0005576;GO:0030145;GO:0030145;GO:0045735;GO:0045735;GO:0046872;	-	-	-	106309566	A0A0D3DNP7
Bo1g019290	3.9924885611985199	1.9972882742048701	2.48065e-09	6.685e-08	0.18635548765911	-2.42387079177436	8.64777e-09	3.23103e-07	C1	6680656	6688880	+	2661	-	GO:0005215;GO:0005215;GO:0016020;GO:0016021;GO:0016021;GO:0016021;	-	-	-	-	-
Bo9g014080	3.77241566217812	1.9154886475730399	2.62651e-09	7.0373e-08	0.396898555071568	-1.3331577847413	1.54454e-06	3.51802e-05	C9	4158944	4159951	+	1008	-	GO:0008152;GO:0008152;GO:0016787;GO:0016787;	-	-	-	106315805	A0A0D3E1K5
Bo3g019820	4.5363538699336798	2.18153318580163	2.72099e-09	7.26953e-08	0.427810362035562	-1.22495666830709	4.85576e-05	0.000710229	C3	6858337	6858974	+	519	-	-	-	-	-	106335537	A0A0D3B352
Bo1g001100	4.3861288207206099	2.1329481846256302	2.93147e-09	7.79827e-08	0.396002025793259	-1.33642028429356	8.08683e-06	0.000149827	C1	46852	50484	+	1692	-	GO:0004672;GO:0004672;GO:0005524;GO:0005524;GO:0006468;GO:0006468;	-	-	-	106311447	A0A0D3A0T2
Bo2g104480	Inf	Inf	3.01516e-09	8.00944e-08	0.258180532385454	-1.95354787383102	0.0203402	0.0947774	C2	30245155	30249107	-	2376	-	GO:0005524;GO:0005524;GO:0016788;GO:0016788;	-	-	-	-	-
Bo3g156990	33.560106470270703	5.06867538765818	3.02293e-09	8.01864e-08	0.291540699645766	-1.77823079438301	0.000183967	0.0021933	C3	56005891	56006535	-	645	-	GO:0016020;GO:0016021;GO:0016021;	-	-	-	106333617	A0A0D3BK97
Bo7g031000	39.771260742213101	5.3136543909432197	3.37251e-09	8.88263e-08	2.04590329538378	1.03273795419005	0.0076765	0.0447756	C7	11560945	11562811	-	972	-	GO:0003723;GO:0003723;GO:0003723;GO:0008168;GO:0008168;GO:0032259;GO:0032259;	K06442	-	-	106303745	A0A0D3D4R2
Bo7g110660	14.834143305126901	3.8908497062263798	3.49585e-09	9.1864e-08	0.441497174607542	-1.17952388961324	0.0031851	0.0226299	C7	43915469	43916932	-	744	-	-	-	-	-	106303993	A0A0D3DG67
Bo9g123730	Inf	Inf	3.82764e-09	9.95454e-08	2.11163898433828	1.07836320589687	0.00913019	0.0512409	C9	39272372	39273946	-	345	-	GO:0003824;GO:0003824;GO:0006281;GO:0006281;	-	-	-	-	-
Bo7g050640	Inf	Inf	3.94415e-09	1.02432e-07	2.02520056755122	1.0180647936677	0.0179116	0.0863376	C7	18855464	18856178	+	315	-	-	-	-	-	106304147	A0A0D3D6N9
Bo5g030880	Inf	Inf	3.99309e-09	1.03631e-07	2.88928450425147	1.53071227128351	0.000128904	0.00162269	C5	10669969	10671267	+	645	-	-	-	-	-	-	-
Bo9g035430	8.4045750737997604	3.07117488020875	4.02124e-09	1.04289e-07	2.09514961626576	1.06705327157973	0.00122173	0.010538	C9	11912293	11915144	+	1944	-	-	-	-	-	-	-
Bo7g111250	5.1651993275084296	2.36882402445513	4.07087e-09	1.05429e-07	0.421713034097623	-1.24566648247733	6.14086e-05	0.000867327	C7	44204180	44206211	+	1422	-	GO:0000162;GO:0000162;GO:0000162;GO:0004834;GO:0004834;GO:0004834;GO:0006568;GO:0006568;GO:0008652;GO:0009073;GO:0009570;GO:0009570;GO:0009941;GO:0009941;GO:0016829;	K01696	EC:4.2.1.20	-	106305825	A0A0D3DGC6
Bo1g045330	7.59938867037659	2.9258833662286401	4.07641e-09	1.05499e-07	3.027232470762	1.59799946853759	0.00537385	0.0341433	C1	13341026	13346299	+	2751	-	GO:0003824;GO:0003824;GO:0004332;GO:0004332;GO:0004332;GO:0005524;GO:0005524;GO:0006096;GO:0006096;GO:0006096;GO:0008152;GO:0008152;GO:0009116;GO:0009116;GO:0016301;GO:0016301;GO:0016829;	-	-	-	-	-
Bo7g115070	4.9121869867070904	2.2963654792057602	4.56134e-09	1.16991e-07	0.208570983229289	-2.261389633401	3.60924e-12	2.64159e-10	C7	45812645	45815470	+	1308	-	GO:0016020;GO:0016021;GO:0016021;	-	-	-	106303892	A0A0D3DH59
Bo5g055760	Inf	Inf	4.67062e-09	1.1963e-07	2.22011815873229	1.15063646147662	0.048713	0.180133	C5	17886418	17886850	+	150	-	-	-	-	-	-	-
Bo5g093130	125.588819507273	6.9725642243913999	4.78729e-09	1.22534e-07	3.14888011955154	1.65483883393549	0.000638556	0.00619346	C5	30195605	30196558	-	465	-	-	-	-	-	106293973	A0A0D3CGZ8
Bo8g081020	3.9671074259513102	1.9880874649872999	5.21974e-09	1.32599e-07	0.334481267217655	-1.58000268057958	6.60199e-08	2.07143e-06	C8	27453057	27454100	+	1044	-	GO:0008375;GO:0008375;GO:0016020;GO:0016020;	-	-	-	106312169	A0A0D3DS94
Bo2g023390	8.7845544208719293	3.1349691102403199	5.37402e-09	1.36332e-07	0.0840402754105007	-3.57277529986381	1.64845e-13	1.58082e-11	C2	6033962	6036237	+	1722	-	GO:0005507;GO:0005507;GO:0005576;GO:0005576;GO:0016491;GO:0016491;GO:0016491;GO:0046872;GO:0055114;GO:0055114;GO:0055114;	K00423	EC:1.10.3.3	-	106327666	A0A0D3AKB3
Bo3g028560	4.3318636882292303	2.11498784603724	5.81453e-09	1.46907e-07	0.446183735855116	-1.16429016899876	0.000114568	0.00147194	C3	10980875	10983841	+	2358	-	GO:0005509;GO:0005509;GO:0016020;GO:0016021;GO:0016021;GO:0055085;GO:0055085;	-	-	-	106335069	A0A0D3B528
Bo5g042910	67.066673244757197	6.0675241357006602	6.11248e-09	1.54016e-07	2.31555115239032	1.21135562768929	0.00241074	0.0182366	C5	14083271	14085337	-	714	-	GO:0008152;GO:0008152;GO:0016491;GO:0016491;GO:0055114;GO:0055114;	-	-	-	-	-
Bo8g011470	Inf	Inf	6.19041e-09	1.55874e-07	2.0341152240718	1.0244014041161	0.0170055	0.0829322	C8	2334464	2335338	+	423	-	-	-	-	-	-	-
Bo6g080190	8.9409852216731593	3.1604338130760898	6.87068e-09	1.7138e-07	3.48093295114807	1.79947402550147	0.0463751	0.173947	C6	24330170	24330385	-	216	-	-	-	-	-	-	-
Bo8g108090	3.99536925779962	1.99832884527538	7.52049e-09	1.86588e-07	0.437771789284769	-1.19174910695211	4.34175e-05	0.000646938	C8	38507056	38508155	-	960	-	GO:0008152;GO:0008152;GO:0016491;GO:0016616;GO:0016616;GO:0051287;GO:0051287;GO:0055114;GO:0055114;GO:0055114;	K15919	-	-	106309711	-
Bo7g081340	Inf	Inf	7.54193e-09	1.86996e-07	2.22066990064267	1.1509949542988	0.00561756	0.0353401	C7	31420286	31420672	+	387	-	-	-	-	-	-	-
Bo2g105350	Inf	Inf	7.64986e-09	1.89168e-07	3.31756637247796	1.73012532898264	1.33561e-05	0.00023353	C2	31390626	31395013	-	1107	-	GO:0004672;GO:0004672;GO:0005524;GO:0005524;GO:0006468;GO:0006468;	-	-	-	-	-
Bo4g120620	3.6424941693386099	1.86492666292177	7.69248e-09	1.90095e-07	0.212726670825771	-2.23292717087004	3.23713e-15	4.62093e-13	C4	31543329	31546325	+	1221	-	GO:0008146;GO:0008146;GO:0016740;	-	-	-	-	-
Bo4g140140	14.5097249040083	3.8589482618877899	9.40286e-09	2.30373e-07	0.252926666893123	-1.98320894176811	9.1727e-06	0.000167755	C4	37582536	37585882	+	2337	-	GO:0003824;GO:0006979;GO:0006979;GO:0009414;GO:0009414;GO:0009507;GO:0009507;GO:0009737;GO:0009737;	K06617	EC:2.4.1.82	-	106342568	A0A0D3C067
Bo7g043700	12.419038850128301	3.6344816178974	9.7697e-09	2.38576e-07	2.31143141262933	1.20878655395278	0.00646673	0.0392687	C7	16140593	16142291	+	1296	-	-	-	-	-	106303853	A0A0D3D5U1
Bo3g123410	22.313442059331699	4.4798411749819502	1.01574e-08	2.47556e-07	0.343474653915212	-1.54172445296184	0.00224361	0.0172408	C3	44015428	44018275	-	1479	-	GO:0006629;GO:0006629;GO:0009611;GO:0009611;GO:0009651;GO:0009651;GO:0010345;GO:0010345;GO:0016491;GO:0050062;GO:0050062;GO:0055114;GO:0080019;GO:0080019;GO:0102965;GO:0102965;	K13356	EC:1.2.1.84	-	106332116	A0A0D3BGW7
Bo9g154650	3.5724440350517201	1.83691141062529	1.04707e-08	2.54358e-07	0.205740562310606	-2.28110184173728	5.86306e-16	1.01518e-13	C9	46305428	46307444	-	1749	-	GO:0000272;GO:0000272;GO:0000272;GO:0005975;GO:0008152;GO:0016020;GO:0016021;GO:0016021;GO:0016161;GO:0016161;GO:0016161;GO:0016787;GO:0016798;GO:0102229;GO:0102229;	-	-	-	-	-
Bo3g071750	7.62697517270579	2.93111100351123	1.10918e-08	2.67526e-07	0.228493890663562	-2.12977250302726	3.85035e-08	1.27549e-06	C3	27855548	27856213	+	666	-	GO:0016020;GO:0016021;GO:0016021;	K19040	EC:2.3.2.27	-	106328847	A0A0D3BC16
Bo8g011640	4.2151958475719802	2.0755996636126399	1.19039e-08	2.85633e-07	0.158148316372173	-2.66064989770702	2.69098e-17	6.13674e-15	C8	2444496	2447011	-	420	-	-	-	-	-	-	-
Bo3g045430	119.470959693485	6.9005161686691299	1.22842e-08	2.93622e-07	2.30992460994776	1.20784576652038	0.0164213	0.0806826	C3	19111552	19114482	-	2130	-	GO:0003824;GO:0003824;GO:0004630;GO:0004630;GO:0004630;GO:0005509;GO:0005509;GO:0016020;GO:0016020;GO:0016042;GO:0016042;GO:0016787;GO:0046470;GO:0046470;GO:0070290;GO:0070290;	-	-	-	-	-
Bo01367s010	117.99165979147099	6.8825410764573798	1.25386e-08	2.99126e-07	0.379372038749068	-1.39831474466885	0.00641356	0.0390536	Scaffold01367	10229	11227	-	927	-	GO:0005515;	-	-	-	-	-
Bo9g069740	3.6051873100718801	1.8500742176607301	1.25694e-08	2.99668e-07	0.33155441591496	-1.5926824247667	1.73833e-08	6.16244e-07	C9	20789339	20791766	+	1218	-	GO:0003824;GO:0003824;GO:0003985;GO:0003985;GO:0008152;GO:0008152;GO:0016740;GO:0016746;GO:0016747;GO:0016747;	K00626	EC:2.3.1.9	-	106317871	-
Bo5g116780	4.12144730076787	2.04315104784071	1.28794e-08	3.06274e-07	0.304180149486374	-1.71700208768951	1.20963e-08	4.40938e-07	C5	35747421	35748770	+	1059	-	GO:0016491;GO:0016491;GO:0016491;GO:0046872;GO:0046872;GO:0055114;GO:0055114;GO:0055114;	-	-	-	106295251	A0A0D3CIN1
Bo8g102480	Inf	Inf	1.35636e-08	3.21722e-07	2.49300543280578	1.31788602678185	0.00197215	0.0155085	C8	36119781	36123592	-	2130	-	GO:0003735;GO:0003735;GO:0005840;GO:0005840;GO:0006412;GO:0006412;	-	-	-	-	-
Bo8g067010	11.354569505883401	3.5052011040144602	1.3669e-08	3.24017e-07	2.79185408560889	1.48122354202413	1.81722e-05	0.000303411	C8	21590534	21595387	-	2250	-	GO:0005634;GO:0005634;GO:0008270;GO:0008270;	-	-	-	-	-
Bo5g134640	Inf	Inf	1.45304e-08	3.43341e-07	0.38429159939643	-1.37972665541502	0.0225806	0.102341	C5	41780091	41781791	+	984	-	-	-	-	-	106293713	A0A0D3CKX7
Bo6g011100	6.3433937809013496	2.6652549035959701	1.60871e-08	3.75124e-07	0.23183352298689	-2.10883890063051	8.04152e-09	3.01658e-07	C6	2647316	2651361	-	1281	-	GO:0000166;GO:0004672;GO:0004672;GO:0004674;GO:0004674;GO:0005524;GO:0005524;GO:0005524;GO:0006468;GO:0006468;GO:0007165;GO:0007165;GO:0016301;GO:0016310;GO:0016740;	K07198	EC:2.7.11.11	-	106296333	A0A0D3CP47
Bo3g038900	5.1073136985231704	2.35256467416774	1.75528e-08	4.07768e-07	0.471699956817609	-1.08405862609326	0.000734594	0.00693608	C3	15426263	15427144	-	882	-	GO:0003677;GO:0003677;GO:0005634;GO:0005634;GO:0006351;GO:0006351;GO:0006355;GO:0006355;	-	-	-	106332053	A0A0D3B6W6
Bo9g123510	8.6555086151598299	3.1136185977559001	1.8505e-08	4.28819e-07	0.366920935465708	-1.44645887187388	0.000415092	0.00432074	C9	39072538	39076905	+	2154	-	GO:0016020;GO:0016021;GO:0016021;	-	-	-	-	-
Bo9g171910	20.174948800908599	4.3344931071874901	1.85785e-08	4.30254e-07	0.303390824228342	-1.72075064160449	0.0140558	0.0716195	C9	50743619	50743948	-	330	-	GO:0009909;	-	-	-	106316938	A0A0D3EGE5
Bo2g062420	7.9812194579736397	2.9966091940116901	1.95745e-08	4.51633e-07	2.29146554205897	1.19627059133107	0.000311695	0.00339075	C2	18139509	18148548	+	5163	-	GO:0003824;GO:0003824;GO:0009063;GO:0009063;GO:0009234;GO:0009234;GO:0030976;GO:0030976;GO:0042372;GO:0042372;GO:0042550;GO:0042550;GO:0070204;GO:0070204;	-	-	-	-	-
Bo5g098810	62.769805327652598	5.9719988294851802	1.98724e-08	4.58223e-07	0.287792881744208	-1.7968971859201	0.000506833	0.00511483	C5	32109864	32110238	-	375	-	GO:0010089;	-	-	-	-	-
Bo9g004250	4.0011390327859502	2.0004107607569499	2.13648e-08	4.88699e-07	0.321072191481599	-1.63903037827878	4.57794e-08	1.49272e-06	C9	784183	785758	+	1194	-	GO:0005267;GO:0005267;GO:0006811;GO:0009705;GO:0009705;GO:0016020;GO:0016020;GO:0016020;GO:0016021;GO:0016021;GO:0071805;GO:0071805;	K05389	-	-	106313280	A0A0D3DZW8
Bo8g005920	4.79262962222107	2.2608174517800399	2.35199e-08	5.3308e-07	0.448349645614122	-1.15730383748911	0.000245316	0.00279356	C8	1278953	1279872	-	726	-	GO:0005622;GO:0005622;GO:0008270;GO:0008270;GO:0046872;	-	-	-	106308115	A0A0D3DJ37
Bo3g116110	Inf	Inf	2.36908e-08	5.36299e-07	2.00248969409705	1.00179481775841	0.020365	0.0948508	C3	41213404	41213740	+	237	-	-	-	-	-	-	-
Bo3g026440	4.3317693949691396	2.1149564420252198	2.46382e-08	5.55718e-07	0.391461785771145	-1.35305661538975	1.40878e-05	0.00024404	C3	9692325	9696871	-	1551	-	GO:0004672;GO:0004672;GO:0005515;GO:0005524;GO:0005524;GO:0006468;GO:0006468;	-	-	-	-	-
Bo3g057080	3.5106844915545401	1.8117523457137299	2.55264e-08	5.74353e-07	0.314321087198693	-1.66968903186152	3.38596e-09	1.37199e-07	C3	22219543	22220733	-	1191	-	GO:0005506;GO:0005506;GO:0016020;GO:0016021;GO:0016021;GO:0016705;GO:0016705;GO:0020037;GO:0020037;GO:0055114;GO:0055114;	-	-	-	-	-
Bo3g143250	12.984992080493299	3.6987732290086801	2.6235e-08	5.87816e-07	0.0667648760110973	-3.90476686748665	9.00365e-14	9.47809e-12	C3	51545841	51547440	-	1065	-	GO:0005215;GO:0005215;GO:0016020;GO:0016021;GO:0016021;GO:0016021;	-	-	-	106331954	A0A0D3BIL5
Bo01184s010	30.110867570770498	4.9122123712666799	2.86989e-08	6.38028e-07	0.404058626629559	-1.30736345980295	0.0131853	0.0682062	Scaffold01184	17966	18614	-	609	-	-	-	-	-	-	-
Bo00641s110	35.274121173602197	5.1405382345694397	2.98234e-08	6.60265e-07	0.23193140103	-2.10822993620827	5.19293e-05	0.000752482	Scaffold00641	132189	132548	+	360	-	-	-	-	-	-	-
Bo9g024390	7.3940454488607203	2.8863639113429098	2.9932e-08	6.62276e-07	0.23062452211623	-2.11638217316152	5.84072e-08	1.85909e-06	C9	7760018	7761898	-	1245	-	GO:0000166;GO:0004672;GO:0004672;GO:0004674;GO:0004674;GO:0005524;GO:0005524;GO:0005524;GO:0006468;GO:0006468;	-	-	-	106313741	A0A0D3E341
Bo4g019600	4.1578135311931099	2.0558250579424802	3.04356e-08	6.72619e-07	0.176016575344543	-2.50621680215323	2.75311e-15	3.99094e-13	C4	2519218	2520828	+	957	-	-	K06911	-	-	106339448	A0A0D3BPH9
Bo3g064660	3.7535306296136599	1.9082482557453699	3.5534e-08	7.76076e-07	0.469860504330356	-1.08969559252713	0.000194715	0.00229076	C3	24800767	24802888	+	1281	-	GO:0016020;GO:0016021;GO:0016021;	K14209	-	-	106328119	A0A0D3BAV4
Bo4g182830	23.017386327435499	4.5246521166056999	3.87126e-08	8.42039e-07	2.36356325294176	1.2409634741674	0.000995401	0.00892677	C4	48400914	48401298	+	183	-	GO:0016020;GO:0016020;GO:0016760;GO:0016760;GO:0030244;GO:0030244;	-	-	-	-	-
Bo8g112420	3.4490803291304499	1.78621172957829	4.30331e-08	9.27342e-07	0.192372262782983	-2.37802729593627	1.01194e-16	2.06812e-14	C8	39814850	39815944	-	783	-	GO:0005623;GO:0005623;GO:0045454;GO:0045454;	-	-	-	106312710	A0A0D3DYE4
Bo7g064510	14.4725446478996	3.8552467021851302	4.31135e-08	9.28537e-07	0.0725242090583013	-3.78539353315205	2.28453e-12	1.7437e-10	C7	24275302	24275854	-	354	-	-	-	-	-	106306577	A0A0D3D8D4
Bo1g108320	6.5358504116681297	2.70837496438718	4.34265e-08	9.34197e-07	0.267371322271859	-1.90308336182296	1.57879e-06	3.58947e-05	C1	33222745	33225838	+	1590	-	GO:0003951;GO:0003951;GO:0006741;GO:0006741;GO:0008152;GO:0008152;GO:0016310;GO:0019674;GO:0019674;	K00858	EC:2.7.1.23	-	106314734	A0A0D3ABX3
Bo7g045200	11.1937017545229	3.4846153090161298	4.53226e-08	9.71617e-07	0.446709182690008	-1.16259218346273	0.00512033	0.0328024	C7	16708312	16715152	+	2925	-	GO:0004672;GO:0004672;GO:0005524;GO:0005524;GO:0006468;GO:0006468;	-	-	-	-	-
Bo9g003740	12.041692582882799	3.5899662867613502	4.6827e-08	1.00271e-06	0.127766967434402	-2.96841320131348	6.59804e-07	1.65061e-05	C9	416373	419326	+	1434	-	GO:0008152;GO:0008152;GO:0016740;GO:0016757;GO:0016758;GO:0016758;	K08237	EC:2.4.1.218	-	106319293	A0A0D3DZR7
Bo4g097090	3.4902423788182801	1.8033272274312599	4.88073e-08	1.04331e-06	0.398888938253605	-1.32594097885247	3.42694e-06	7.12438e-05	C4	24350948	24354989	+	2178	-	GO:0004672;GO:0004672;GO:0005524;GO:0005524;GO:0005737;GO:0006468;GO:0006468;GO:0008168;GO:0008168;GO:0008270;GO:0009086;GO:0010269;GO:0016205;GO:0016740;GO:0032259;GO:0046872;GO:0046872;GO:0047150;	-	-	-	-	-
Bo4g111320	3.6326130942683199	1.8610077140315999	5.49582e-08	1.16876e-06	0.277181281761599	-1.85109826028929	2.52185e-10	1.28323e-08	C4	28366587	28367780	+	1098	-	GO:0004553;GO:0004553;GO:0005975;GO:0005975;GO:0008152;GO:0016787;GO:0016798;	-	-	-	106341843	A0A0D3BXB6
Bo6g108870	3.46180356876377	1.7915238649673	5.86528e-08	1.24306e-06	0.322369679357179	-1.63321203805041	1.21527e-08	4.42563e-07	C6	34081480	34084487	-	2148	-	GO:0016020;GO:0016020;GO:0016020;GO:0016021;GO:0016021;	K21989	-	-	106300777	A0A0D3CZ87
Bo6g031270	Inf	Inf	6.65407e-08	1.39908e-06	2.61081055700332	1.38449777806923	0.00142142	0.0118849	C6	7529268	7531903	-	1311	-	-	-	-	-	-	-
Bo3g097830	15.7236527606339	3.9748645037999801	7.31194e-08	1.5262e-06	0.135540053516982	-2.88320884868505	8.21578e-08	2.52274e-06	C3	35096215	35099013	-	2001	-	GO:0004611;GO:0004611;GO:0004612;GO:0004612;GO:0005524;GO:0005524;GO:0006094;GO:0006094;GO:0017076;GO:0017076;	K01610	EC:4.1.1.49	-	106329348	A0A0D3BEP1
Bo3g157260	5.2249385209020298	2.3854140618611601	7.47608e-08	1.55697e-06	3.09149646787714	1.62830535727905	4.80515e-07	1.23514e-05	C3	56257927	56259724	-	1752	-	GO:0000166;GO:0004672;GO:0004672;GO:0004674;GO:0004674;GO:0005524;GO:0005524;GO:0005524;GO:0006468;GO:0006468;GO:0007165;GO:0007165;GO:0016301;GO:0016310;GO:0016740;	-	-	-	-	-
Bo9g171780	33.7162446381517	5.0753719507513599	7.75041e-08	1.60959e-06	2.03371547874321	1.02411785711174	0.0100955	0.0554031	C9	50678114	50678697	-	348	-	-	-	-	-	-	-
Bo7g116760	6.4052590191562002	2.6792569121900902	8.53627e-08	1.75906e-06	0.262762038944656	-1.92817122935695	2.98537e-07	8.09665e-06	C7	46633203	46636292	-	771	-	GO:0000977;GO:0000977;GO:0003677;GO:0003677;GO:0003677;GO:0003700;GO:0003700;GO:0005634;GO:0005634;GO:0005634;GO:0006351;GO:0006351;GO:0006355;GO:0006355;GO:0006355;GO:0045944;GO:0045944;GO:0046983;GO:0046983;	-	-	-	-	-
Bo6g067010	4.1333638053567396	2.0473163506674701	9.55585e-08	1.94973e-06	0.461804668271001	-1.11464533784857	0.000330356	0.0035559	C6	18394684	18396053	+	621	-	-	-	-	-	-	-
Bo8g079660	3.4503001475484401	1.78672186987472	1.22297e-07	2.46023e-06	0.157039619531238	-2.67079951226522	2.29895e-19	8.18863e-17	C8	26530272	26530760	+	489	-	GO:0003677;GO:0003677;GO:0003677;GO:0003700;GO:0003700;GO:0005634;GO:0005634;GO:0006351;GO:0006351;GO:0006355;GO:0006355;GO:0006355;GO:0009409;GO:0009409;GO:0009617;GO:0010200;GO:0010200;GO:0010941;GO:0010941;GO:0042742;GO:0042742;	-	-	-	106308117	A0A0D3DRV8
Bo1g138650	10.133612264416801	3.3410766290475	1.2886e-07	2.58387e-06	0.344009480441733	-1.53947977066404	0.000550137	0.0054911	C1	39473474	39475328	+	1317	-	GO:0003677;GO:0003677;GO:0005634;GO:0005634;GO:0006351;GO:0006351;GO:0006355;GO:0006355;	-	-	-	106317859	A0A0D3AE29
Bo8g081490	4.4847601996651196	2.1650308462363999	1.31971e-07	2.64339e-06	0.155649174355724	-2.68363017086576	8.88918e-13	7.48774e-11	C8	27743111	27745381	-	1362	-	-	-	-	-	106308249	A0A0D3DSE1
Bo4g136860	17.9280209733056	4.1641443366030098	1.35195e-07	2.70651e-06	0.376666948341644	-1.40863864921979	0.00233492	0.0177745	C4	35830890	35832328	+	858	-	GO:0015267;GO:0015267;GO:0016020;GO:0016020;GO:0016020;GO:0016021;GO:0016021;GO:0055085;GO:0055085;	K09874	-	-	106340767	A0A0D3BZI8
Bo4g194280	3.2810879462546301	1.7141742643607401	1.40462e-07	2.80291e-06	0.350767183351557	-1.51141431469478	9.97789e-08	3.0022e-06	C4	52289955	52292316	+	1533	-	GO:0005215;GO:0005215;GO:0016020;GO:0016020;GO:0016020;GO:0016021;GO:0016021;GO:0016021;GO:0022857;GO:0022857;GO:0055085;GO:0055085;	K08150	-	-	106342718	A0A0D3C615
Bo1g032020	5.4346108677415197	2.4421767382373298	1.65418e-07	3.26588e-06	0.107364788288834	-3.21940717503143	3.6387e-16	6.60619e-14	C1	10211730	10214804	-	2103	-	GO:0007037;GO:0009705;GO:0009705;GO:0016020;GO:0016021;GO:0016021;GO:0016021;GO:0055085;GO:0055085;	-	-	-	106325754	A0A0D3A5D9
Bo7g113180	4.1978375141231901	2.0696463252519299	1.82671e-07	3.57993e-06	0.240633370422455	-2.05509136922858	4.24879e-10	2.03985e-08	C7	44665955	44671143	-	1053	-	GO:0003677;GO:0003677;GO:0003677;GO:0005634;GO:0005634;GO:0006351;GO:0006351;GO:0006355;GO:0006355;GO:0006355;	-	-	-	106302166	A0A0D3DGM0
Bo3g164390	Inf	Inf	2.07011e-07	4.02303e-06	2.37937019034203	1.2505797485273	0.00575521	0.0359581	C3	58064130	58065075	-	447	-	-	-	-	-	-	-
Bo00877s030	4.1264012822841698	2.0448841265590598	2.3585e-07	4.55022e-06	0.202093158151955	-2.3069076146706	3.21928e-12	2.37947e-10	Scaffold00877	10264	12611	-	1407	-	-	-	-	-	106320306	A0A0D2ZRV0
Bo5g094560	7.0127497834952299	2.8099802532425802	2.45814e-07	4.73265e-06	5.64097689192663	2.49594502700285	3.21821e-06	6.73537e-05	C5	30723723	30725640	+	1137	-	GO:0004672;GO:0004672;GO:0005524;GO:0005524;GO:0006468;GO:0006468;	-	-	-	106292665	A0A0D3CH42
Bo1g016210	4.0327940887582097	2.01177974476902	2.5e-07	4.81076e-06	0.413110752899561	-1.27539948215648	0.00357298	0.0248382	C1	5215541	5219026	-	2262	-	GO:0003824;GO:0003824;GO:0005623;GO:0005623;GO:0008152;GO:0008152;GO:0016020;GO:0016021;GO:0016021;GO:0045454;GO:0045454;	-	-	-	-	-
Bo5g146980	40.483671349151599	5.3392682247673804	2.52151e-07	4.83963e-06	0.351419813041651	-1.50873256213205	0.00113076	0.00989948	C5	45474298	45475125	-	828	-	GO:0004751;GO:0004751;GO:0009052;GO:0009052;GO:0009507;GO:0009535;GO:0009535;GO:0009570;GO:0009570;GO:0009579;GO:0009735;GO:0009735;GO:0009941;GO:0009941;GO:0042742;GO:0042742;	K01807	EC:5.3.1.6	-	106343538	A0A0D3CMR7
Bo8g082640	Inf	Inf	2.69732e-07	5.15581e-06	0.332303743348596	-1.58942555003666	0.0092738	0.0517981	C8	28522776	28524768	+	1506	-	GO:0004497;GO:0004497;GO:0005506;GO:0005506;GO:0016491;GO:0016705;GO:0016705;GO:0020037;GO:0020037;GO:0046872;GO:0055114;GO:0055114;GO:0055114;	-	-	-	106310564	A0A0D3DSQ6
Bo6g035900	3.0991058180528501	1.63185201616121	2.82143e-07	5.37096e-06	0.343022876154877	-1.54362330211995	3.09767e-08	1.04372e-06	C6	8919675	8921515	-	1137	-	GO:0008289;GO:0008289;GO:0016020;GO:0016021;GO:0016021;	-	-	-	106296385	A0A0D3CR45
Bo7g048550	4.1894774604342997	2.0667703125996399	2.85394e-07	5.42731e-06	0.291901310391875	-1.77644740754285	6.01565e-08	1.90665e-06	C7	18007091	18007960	+	870	-	GO:0016020;GO:0016021;GO:0016021;GO:0045492;GO:0045492;	-	-	-	106301246	A0A0D3D6C9
Bo6g109180	3.2258743764490201	1.68969025746353	2.87027e-07	5.45313e-06	0.236541924350015	-2.07983218746862	5.19151e-13	4.56853e-11	C6	34291237	34292007	+	771	-	GO:0003677;GO:0003677;	-	-	-	106298620	A0A0D3CZB8
Bo5g072900	4.0929946378361501	2.0331567767315799	3.14707e-07	5.95734e-06	0.356942354985013	-1.48623699232	1.54379e-05	0.000263764	C5	24336306	24339013	+	2085	-	GO:0016020;GO:0016021;GO:0016021;	-	-	-	106295041	A0A0D3CFQ9
Bo4g192990	18.586683044580099	4.2161974266238396	3.25943e-07	6.14503e-06	2.77130577234217	1.47056589952535	0.000104952	0.00136529	C4	52143111	52143739	-	309	-	-	-	-	-	106337693	A0A0D3C5Y5
Bo6g081060	Inf	Inf	3.26555e-07	6.15345e-06	0.333680455532084	-1.58346090801561	0.0101097	0.055432	C6	24933622	24938108	-	1500	-	GO:0004672;GO:0004672;GO:0005524;GO:0005524;GO:0006468;GO:0006468;	-	-	-	-	-
Bo2g151530	3.9146246595274201	1.9688739862397799	3.36976e-07	6.32102e-06	0.371063378641159	-1.43026247073107	1.83305e-06	4.11502e-05	C2	47617894	47623447	-	2319	-	GO:0004553;GO:0004553;GO:0005975;GO:0005975;GO:0016787;	-	-	-	106327099	A0A0D3AX14
Bo8g090790	3.4290089064068998	1.77779165149209	3.54867e-07	6.63988e-06	0.253496205516596	-1.9799639426227	3.49437e-11	2.08436e-09	C8	30520980	30521657	+	678	-	-	-	-	-	-	-
Bo3g158520	5.3092229900000003	2.4085007366417499	3.96835e-07	7.39171e-06	2.72297277605641	1.44518255856799	1.13657e-05	0.000203582	C3	56480255	56484585	+	1689	-	-	-	-	-	-	-
Bo7g100560	3.9488000138544099	1.9814143046616799	4.21531e-07	7.83209e-06	0.370220139072595	-1.43354471845279	6.36024e-06	0.000121488	C7	39130237	39131266	-	612	-	GO:0016020;GO:0016021;GO:0016021;GO:0016021;	-	-	-	106303939	A0A0D3DDV6
Bo1g039770	5.8876928213701696	2.5577024036221099	4.23614e-07	7.86688e-06	0.334760332603284	-1.57879950889577	1.02019e-05	0.000184681	C1	12184001	12186070	+	1047	-	-	-	-	-	106323195	A0A0D3A669
Bo1g093100	4.3945666152981904	2.1357208962471201	4.24752e-07	7.88408e-06	2.0086546225257	1.00622952165967	0.00122276	0.010542	C1	27582207	27584173	-	1131	-	GO:0004659;GO:0004659;GO:0009507;GO:0009507;GO:0009772;GO:0009772;GO:0010236;GO:0010236;GO:0016020;GO:0016021;GO:0016021;GO:0016021;GO:0016765;GO:0016765;GO:0042372;GO:0042372;GO:0042372;	K02548	-	-	106323857	A0A0D3AAE1
Bo7g050000	4.58664000774532	2.1974376788562	4.37643e-07	8.09107e-06	0.325997876568254	-1.61706552759183	0.00010542	0.001369	C7	18301975	18303052	-	594	-	-	-	-	-	106301346	A0A0D3D6H5
Bo2g137040	9.5084479943443796	3.2492098780376999	4.6014e-07	8.47331e-06	0.484541835418592	-1.04530686135165	0.0124432	0.0651971	C2	43865043	43866612	+	1173	-	GO:0005274;GO:0015210;GO:0015720;GO:0015857;GO:0016020;GO:0016021;GO:0016021;GO:0016021;GO:0022857;GO:0022857;GO:0055085;GO:0071705;GO:0071705;	-	-	-	106322997	-
Bo3g001590	3.3216522677703502	1.73190105047624	4.815e-07	8.83609e-06	0.495882239441616	-1.0119305402929	0.000488731	0.0049616	C3	269811	270878	-	1068	-	GO:0016020;GO:0016021;GO:0016021;GO:0030246;GO:0030246;GO:0030246;	-	-	-	106336097	A0A0D3AZC4
Bo2g098940	11.3153492923065	3.5002092145783799	4.81502e-07	8.83609e-06	0.313664857758562	-1.67270419266622	0.00022381	0.00258428	C2	28087277	28088451	-	234	-	GO:0003677;GO:0003677;	K09422	-	-	106325951	A0A0D3AS69
Bo6g081440	7.3736159841753501	2.8823722832405001	4.88645e-07	8.95393e-06	0.447136792444941	-1.16121183262578	0.00119648	0.0103632	C6	25230147	25231128	+	642	-	GO:0016020;GO:0016021;GO:0016021;	-	-	-	106298721	A0A0D3CVX8
Bo1g139020	3.4398521108668398	1.78234654065255	5.17413e-07	9.42538e-06	0.462685732572374	-1.11189548239962	9.3622e-05	0.00123596	C1	39714822	39716964	-	1338	-	GO:0004190;GO:0004190;GO:0004190;GO:0006508;GO:0006508;GO:0006508;GO:0008233;GO:0016787;	-	-	-	106312497	A0A0D3AE66
Bo3g066810	Inf	Inf	5.42478e-07	9.84342e-06	3.18962173019712	1.67338533924799	0.0250579	0.111015	C3	26340628	26341991	-	507	-	-	-	-	-	-	-
Bo3g064450	24.9711379111212	4.6421896598990404	5.79864e-07	1.04657e-05	2.73579146075995	1.45195826312081	0.000265209	0.00298311	C3	24639604	24641074	+	819	-	GO:0050832;GO:0050832;	-	-	-	-	-
Bo8g108320	10.299517943255999	3.3645049102425699	6.10177e-07	1.09808e-05	2.24913469639817	1.1693700639644	0.00180362	0.0144469	C8	38598891	38599979	-	717	-	GO:0006139;GO:0006139;GO:0006364;GO:0006364;	K07447	EC:3.1.-.-	-	106312531	A0A0D3DXT2
Bo00852s050	4.1707346999092296	2.0603015454330098	6.11113e-07	1.09924e-05	35.50234092903	5.14984225007812	4.55889e-12	3.24149e-10	Scaffold00852	64641	66730	-	1776	-	-	K20929	EC:1.2.3.15	-	106320217	A0A0D2ZRM0
Bo4g098550	18.690899351432101	4.2242640839080998	6.28014e-07	1.12528e-05	14.7748641314042	3.88507295843056	5.76146e-31	1.1971e-27	C4	24630628	24633720	+	1932	-	GO:0004553;GO:0004553;GO:0005975;GO:0005975;GO:0016787;	K05349	EC:3.2.1.21	-	106341780	A0A0D3BW80
Bo4g188890	6.8577299987190496	2.7777311038685899	6.7476e-07	1.20325e-05	0.295493433379145	-1.75880202450691	1.37865e-05	0.000239376	C4	50915082	50916522	+	762	-	GO:0046983;GO:0046983;	-	-	-	106339619	A0A0D3C5C3
Bo5g019360	8.3096271207861907	3.0547837401650302	6.82046e-07	1.21566e-05	4.8564374384545	2.27989837667303	0.0102195	0.0559274	C5	6436578	6438888	+	1413	-	GO:0016020;GO:0016021;GO:0016021;GO:0016787;GO:0016787;GO:0016787;	K01510	EC:3.6.1.5	-	106295086	A0A0D3CA22
Bo8g075190	92.289822987874601	6.5280996622121297	7.24938e-07	1.28168e-05	0.322259144133465	-1.63370679911242	0.00636982	0.0388441	C8	24306921	24309201	+	1914	-	GO:0005488;GO:0005874;GO:0005874;GO:0008017;GO:0008017;	-	-	-	-	-
Bo2g025470	62.595820703989297	5.9679944317432296	7.2864e-07	1.28761e-05	0.37476202495382	-1.41595332435155	0.0317032	0.131847	C2	7715703	7717902	-	1500	-	GO:0003935;GO:0003935;GO:0008686;GO:0008686;GO:0009231;GO:0009231;GO:0009507;GO:0009507;	K14652	-	-	106322162	A0A0D3AKX1
Bo3g153790	3.1341583348820299	1.64807806531751	7.49782e-07	1.32246e-05	0.448485482468802	-1.15686680920603	5.33737e-05	0.000771022	C3	55042254	55043279	+	612	-	GO:0009744;GO:0009744;GO:0009749;GO:0009749;GO:0009750;GO:0009750;GO:0016020;GO:0016021;GO:0016021;GO:0016021;	-	-	-	106331795	A0A0D3BJX5
Bo5g014750	3.1039163164311701	1.63408966206846	8.22948e-07	1.44007e-05	0.276010872189745	-1.85720299837196	1.19689e-10	6.4594e-09	C5	4701792	4704817	+	2529	-	GO:0000166;GO:0004672;GO:0004672;GO:0004674;GO:0004674;GO:0004674;GO:0005524;GO:0005524;GO:0005524;GO:0006468;GO:0006468;GO:0016020;GO:0016021;GO:0016021;GO:0016301;GO:0016310;GO:0016740;GO:0048544;GO:0048544;	-	-	-	106292447	A0A0D3C9B0
Bo4g030200	11.290369764081801	3.49702083060604	9.48425e-07	1.64783e-05	0.297884856667243	-1.74717331056268	0.00320664	0.0227309	C4	6403488	6405116	-	936	-	GO:0016491;GO:0016491;GO:0055114;GO:0055114;	K00002	EC:1.1.1.2	-	106341758	A0A0D3BR44
Bo4g052140	3.3908042031318102	1.7616274805219501	9.66401e-07	1.67438e-05	0.135076289859147	-2.88815363639409	8.47728e-20	3.4462e-17	C4	11762472	11763497	-	732	-	GO:0005622;GO:0005622;GO:0008270;GO:0008270;GO:0010100;GO:0010100;GO:0046872;	-	-	-	106342078	A0A0D3BT53
Bo6g122460	4.1813415701153103	2.06396590068496	1.12605e-06	1.92764e-05	0.351177300114313	-1.50972850192447	3.23969e-07	8.67795e-06	C6	39110903	39115214	+	2331	-	GO:0016853;GO:0016866;GO:0016866;	-	-	-	-	-
Bo7g063820	17.583821383969401	4.1361767315003801	1.13864e-06	1.94741e-05	0.329798424725045	-1.6003435870968	0.00194373	0.0153334	C7	23746312	23748355	+	1500	-	GO:0004497;GO:0004497;GO:0005506;GO:0005506;GO:0016491;GO:0016705;GO:0016705;GO:0020037;GO:0020037;GO:0046872;GO:0055114;GO:0055114;GO:0055114;	-	-	-	-	-
Bo4g006850	3.0537158145332599	1.6105658080285501	1.17874e-06	2.00953e-05	0.388005949523607	-1.36584932061311	1.81389e-06	4.07689e-05	C4	615200	615919	+	720	-	-	-	-	-	106339831	A0A0D3BNP4
Bo8g054200	5.9504066836169596	2.5729882735276601	1.21386e-06	2.06751e-05	0.077183083084616	-3.69557151617221	9.84718e-16	1.60823e-13	C8	17830570	17830991	-	225	-	-	-	-	-	106310901	A0A0D3DN99
Bo5g049160	Inf	Inf	1.23197e-06	2.09643e-05	2.40328305936056	1.26500657950646	0.00651209	0.039512	C5	16457303	16458307	+	1005	-	-	-	-	-	-	-
Bo3g042120	19.945177943354398	4.3179680895508401	1.26349e-06	2.14614e-05	0.273207281473373	-1.87193216028741	0.000356345	0.00378617	C3	17191339	17193477	+	1107	-	GO:0046983;GO:0046983;	-	-	-	-	-
Bo8g061250	Inf	Inf	1.47821e-06	2.46695e-05	0.0659291074692988	-3.92294063910406	1.11712e-06	2.63266e-05	C8	19993670	19997025	-	1518	-	GO:0006855;GO:0006855;GO:0015238;GO:0015238;GO:0015297;GO:0015297;GO:0016020;GO:0016020;GO:0016020;GO:0016021;GO:0016021;GO:0055085;GO:0055085;	K03327	-	-	106307981	A0A0D3DP58
Bo8g092130	6.2212220635201403	2.6371980034756999	1.47904e-06	2.46724e-05	0.388510180074295	-1.36397569303615	0.000216885	0.00251988	C8	31348689	31351087	+	1536	-	GO:0005515;GO:0006508;GO:0006508;GO:0008236;GO:0008236;GO:0016020;GO:0016020;	K03797	EC:3.4.21.102	-	106308109	A0A0D3DU10
Bo6g094690	16.462686757144301	4.0411279017823798	1.50335e-06	2.50442e-05	0.42012844798976	-1.25109761712245	0.0139583	0.0712293	C6	29257927	29259297	+	1371	-	GO:0016747;GO:0016747;	-	-	-	106298572	A0A0D3CXG1
Bo2g155430	3.13636500438309	1.6490934674156199	1.65585e-06	2.73763e-05	0.466227935297905	-1.10089264488578	0.000157785	0.00192723	C2	48473581	48476582	+	1065	-	GO:0003677;GO:0003677;GO:0006260;GO:0006260;	K10756	-	-	106324668	A0A0D3AXA7
Bo2g146560	10.7265645015439	3.4231161793495701	1.69711e-06	2.80087e-05	0.308677612708275	-1.69582724169122	0.000302733	0.00331544	C2	46129907	46131812	-	933	-	-	-	-	-	-	-
Bo00706s040	52.517355148680799	5.7147223567015004	1.83127e-06	3.00099e-05	4.91476372421036	2.29712206110226	0.00418186	0.0280289	Scaffold00706	59738	62023	-	741	-	GO:0016020;GO:0016021;GO:0016021;	-	-	-	-	-
Bo3g074790	11.162212057016999	3.4805510546216198	1.83914e-06	3.01125e-05	7.07442039289538	2.82261195281387	1.25624e-09	5.48229e-08	C3	28670185	28672294	+	2040	-	GO:0004672;GO:0004672;GO:0005515;GO:0005524;GO:0005524;GO:0006468;GO:0006468;GO:0016020;GO:0016021;GO:0016021;	-	-	-	106328586	A0A0D3BCC2
Bo6g003330	3.0643248348063898	1.61556923875254	1.84044e-06	3.01205e-05	0.383202597241613	-1.38382075559068	2.50303e-06	5.38007e-05	C6	435576	441243	-	1458	-	GO:0008152;GO:0008152;GO:0009694;GO:0009694;GO:0009753;GO:0009753;GO:0010112;GO:0010112;GO:0016020;GO:0016021;GO:0016021;GO:0016787;GO:0016787;GO:1990206;GO:1990206;	K21604	EC:3.5.1.127	-	106296853	A0A0D3CNL4
Bo5g146620	10.6414996930821	3.4116295772404301	1.85797e-06	3.03755e-05	0.325773571723192	-1.61805852445059	0.000462319	0.0047333	C5	45266698	45270376	-	1389	-	GO:0005215;GO:0005215;GO:0016020;GO:0016020;GO:0016020;GO:0016021;GO:0016021;GO:0016021;GO:0022857;GO:0022857;GO:0055085;GO:0055085;	-	-	-	106293115	A0A0D3CMN1
Bo5g025680	2.9699775694775301	1.57045203522613	1.8606e-06	3.03897e-05	0.40810305224568	-1.29299459418295	5.73073e-06	0.000111224	C5	8935473	8939085	+	1461	-	GO:0005515;	-	-	-	106343155	A0A0D3CBA6
Bo1g107160	33.600074013893497	5.0703925058485302	1.95561e-06	3.18513e-05	0.481895255788085	-1.05320849693188	0.0420902	0.161835	C1	33051197	33052959	-	1509	-	-	-	-	-	-	-
Bo7g067420	12.0995304388622	3.5968791550591499	2.04163e-06	3.31506e-05	0.291270220670972	-1.77956988632523	0.000240328	0.00274954	C7	26349948	26351543	-	1596	-	GO:0003824;GO:0003824;GO:0009505;GO:0009505;GO:0016491;GO:0016491;GO:0016614;GO:0016614;GO:0050660;GO:0050660;GO:0055114;GO:0055114;GO:0071949;	-	-	-	106305538	A0A0D3D8X6
Bo4g092640	Inf	Inf	2.13093e-06	3.44953e-05	3.08901242698193	1.62714567488563	0.000286631	0.00317442	C4	22634049	22635981	-	408	-	-	-	-	-	-	-
Bo1g088040	3.1537360074190399	1.65706190022751	2.13553e-06	3.45547e-05	0.340964235532963	-1.55230767506669	2.28063e-07	6.3464e-06	C1	26334856	26336632	-	1593	-	GO:0006779;GO:0006782;GO:0006782;GO:0008883;GO:0008883;GO:0008883;GO:0016491;GO:0033014;GO:0033014;GO:0050661;GO:0050661;GO:0055114;GO:0055114;GO:0055114;	K02492	EC:1.2.1.70	-	106312231	A0A0D3AA31
Bo6g117920	3.0594000718216798	1.6132487776686	2.19648e-06	3.54843e-05	0.320372897414981	-1.64217598964654	2.17571e-08	7.57651e-07	C6	36668419	36672909	-	2850	-	GO:0004672;GO:0004672;GO:0005524;GO:0005524;GO:0005634;GO:0005634;GO:0006468;GO:0006468;GO:0009651;GO:0009651;GO:0010182;GO:0010182;	-	-	-	106300318	A0A0D3D0E7
Bo9g169320	3.1051881230985301	1.63468067457775	2.1966e-06	3.54843e-05	0.468839304125305	-1.09283457485038	0.000201544	0.00235997	C9	49824798	49826954	+	1608	-	GO:0004672;GO:0004672;GO:0005509;GO:0005509;GO:0005524;GO:0005524;GO:0005886;GO:0005886;GO:0006468;GO:0006468;	K13412	EC:2.7.11.1	-	106317947	A0A0D3EFY5
Bo9g088470	5.8556095234083099	2.5498193518758998	2.19679e-06	3.54843e-05	2.17148033098983	1.11867888509117	0.00112905	0.00988989	C9	27388155	27388848	+	381	-	GO:0000786;GO:0000786;GO:0000786;GO:0003677;GO:0003677;GO:0003677;GO:0005634;GO:0005634;GO:0005634;GO:0005694;GO:0046982;GO:0046982;	-	-	-	-	-
Bo3g148950	3.1840094293410002	1.6708446083826201	2.47269e-06	3.94612e-05	0.485342850336641	-1.04292385535173	0.000461377	0.00472753	C3	52865577	52869734	-	2550	-	GO:0003677;GO:0003677;GO:0003677;GO:0005515;GO:0005634;GO:0005634;GO:0005634;GO:0006351;GO:0006351;GO:0006355;GO:0006355;GO:0006355;GO:0009725;GO:0009725;GO:0009734;GO:0009734;	-	-	-	106335498	A0A0D3BJ39
Bo2g160740	22.6017904407177	4.4983651576884904	2.49386e-06	3.9782e-05	0.152130804314164	-2.71661578711344	6.27567e-06	0.000120056	C2	50251485	50253624	+	1305	-	GO:0004506;GO:0004506;GO:0016021;GO:0016021;GO:0050660;GO:0050660;GO:0055114;GO:0055114;	-	-	-	-	-
Bo1g037710	3.9145818625191202	1.96885821375212	2.56134e-06	4.07362e-05	0.496906190476755	-1.00895457973614	0.000425321	0.00440759	C1	11532794	11534057	+	1170	-	GO:0003824;GO:0003824;GO:0050662;GO:0050662;	K22419	EC:1.3.1.3	-	106306475	A0A0D3A5W2
Bo4g086410	Inf	Inf	2.68464e-06	4.24975e-05	2.45974209569805	1.29850705671779	0.00580688	0.0361824	C4	20775470	20776648	+	567	-	-	-	-	-	-	-
Bo8g058960	3.9974930783692302	1.99909553569159	2.69747e-06	4.26824e-05	0.336509716715883	-1.57127993164039	6.9537e-05	0.000964645	C8	19121706	19124824	-	2007	-	GO:0003824;GO:0003824;GO:0005975;GO:0005975;GO:0030246;GO:0030246;	-	-	-	-	-
Bo3g086830	3.2352100323390198	1.69385937613673	2.73076e-06	4.31552e-05	0.221016133554116	-2.17777640875952	2.31145e-12	1.76066e-10	C3	31983215	31984402	-	900	-	-	-	-	-	-	-
Bo3g065390	3.7753005583852599	1.91659150452542	2.85167e-06	4.48743e-05	0.21631664526688	-2.20878341192666	1.30485e-10	6.96645e-09	C3	25228904	25229533	+	630	-	GO:0016020;GO:0016021;GO:0016021;	-	-	-	106333255	A0A0D3BB27
Bo3g060260	3.0529204013533602	1.6101899747167101	2.91919e-06	4.58206e-05	0.462591970661694	-1.11218786995755	0.000135092	0.00168246	C3	22846981	22851447	-	2778	-	GO:0016787;GO:0016787;	-	-	-	-	-
Bo6g113040	3.2972716114340801	1.7212727333319899	3.00535e-06	4.70144e-05	0.460886368387522	-1.11751699709901	0.000249424	0.00283282	C6	35601993	35603033	+	720	-	-	-	-	-	-	-
Bo2g001260	2.8183667097571701	1.49485933908833	3.01747e-06	4.71841e-05	0.293125358423035	-1.77041031318321	2.99237e-10	1.49419e-08	C2	224411	225340	+	930	-	GO:0003824;GO:0003824;GO:0008152;GO:0008152;GO:0042819;GO:0042819;GO:0042823;GO:0042823;	K06215	EC:4.3.3.6	-	106327790	A0A0D3AHD8
Bo5g052400	4.9625065441713598	2.31106900477194	3.02581e-06	4.72748e-05	0.188811466906814	-2.40498170970439	1.85241e-07	5.24851e-06	C5	17524269	17527955	-	3096	-	GO:0000166;GO:0005524;GO:0005524;GO:0005524;GO:0016020;GO:0016021;GO:0016021;GO:0016021;GO:0016887;GO:0016887;GO:0042626;GO:0042626;GO:0055085;GO:0055085;	-	-	-	-	-
Bo3g018170	Inf	Inf	3.1263e-06	4.87425e-05	2.19498361870935	1.13421017288365	0.0186003	0.0887312	C3	6039270	6042533	-	3024	-	GO:0000166;GO:0004672;GO:0004672;GO:0004674;GO:0004674;GO:0005515;GO:0005524;GO:0005524;GO:0005524;GO:0006468;GO:0006468;GO:0016020;GO:0016021;GO:0016021;GO:0016301;GO:0016310;GO:0016740;	-	-	-	106333043	A0A0D3B2N7
Bo1g040550	2.9108663928240501	1.54144862206674	3.14198e-06	4.89462e-05	0.1738029926804	-2.52447517103194	3.96162e-14	4.51722e-12	C1	12690102	12691145	+	528	-	GO:0005886;GO:0005886;GO:0016020;GO:0016021;GO:0016021;	-	-	-	106342811	A0A0D3A6E7
Bo5g005750	4.3126254456460602	2.1085664225009002	3.25206e-06	5.0555e-05	0.270082027115358	-1.88853045746282	3.23757e-07	8.67795e-06	C5	1968077	1978129	-	5850	-	GO:0000148;GO:0000148;GO:0003843;GO:0003843;GO:0005886;GO:0006075;GO:0006075;GO:0009504;GO:0009504;GO:0009506;GO:0009506;GO:0016020;GO:0016020;GO:0016020;GO:0016021;GO:0016021;	K11000	EC:2.4.1.-	-	106294676	A0A0D3C7V6
Bo5g065530	Inf	Inf	3.33169e-06	5.17281e-05	0.294016215973205	-1.76603236819658	0.0071557	0.0424193	C5	20703661	20704244	+	387	-	-	-	-	-	-	-
Bo2g052880	3.17035904547773	1.6646462358844001	3.47644e-06	5.37959e-05	0.386806664725129	-1.37031544205023	6.68075e-06	0.000126895	C2	15300744	15302267	+	1524	-	GO:0000989;GO:0000989;GO:0003712;GO:0005634;GO:0005634;GO:0005634;GO:0006351;GO:0006351;GO:0006355;GO:0006355;GO:0009739;GO:0009739;GO:0009938;GO:0009938;	K14494	-	-	106319195	A0A0D3AND1
Bo8g097880	3.29092081241253	1.7184913121157901	3.8133e-06	5.86187e-05	0.455183045199038	-1.13548127419985	0.00023152	0.00266344	C8	33415341	33416185	+	492	-	GO:0006950;GO:0006950;	-	-	-	106310020	A0A0D3DV37
Bo8g112900	Inf	Inf	3.88919e-06	5.9662e-05	2.02158118534158	1.01548414243613	0.0233371	0.105081	C8	40057756	40058347	-	393	-	GO:0003735;GO:0003735;GO:0003735;GO:0005618;GO:0005774;GO:0005840;GO:0005840;GO:0005840;GO:0005886;GO:0006412;GO:0006412;GO:0009506;GO:0022626;GO:0022627;GO:0022627;GO:0030529;GO:0042788;GO:0042788;	K02957	-	-	106331900	A0A0D3BHF9
Bo6g076170	2.88445946331277	1.5283009886586001	4.12997e-06	6.29921e-05	0.340796494393112	-1.55301759954569	6.25307e-08	1.97521e-06	C6	22130678	22135730	-	2775	-	GO:0005515;GO:0016491;GO:0016491;GO:0055114;GO:0055114;	-	-	-	-	-
Bo6g083440	3.5379869877526802	1.82292874199694	4.31354e-06	6.56575e-05	0.468853562544751	-1.09279070003431	0.00657205	0.0397726	C6	26046443	26048328	-	1140	-	GO:0008270;GO:0008270;GO:0016491;GO:0016491;GO:0046872;GO:0055114;GO:0055114;	K18857	EC:1.1.1.1	-	106298631	A0A0D3CW79
Bo8g015050	19.0221107527626	4.2496054359116	4.38105e-06	6.65013e-05	11.7630343801632	3.55618835918864	2.11416e-08	7.38967e-07	C8	2935012	2935745	+	513	-	GO:0005634;GO:0005634;GO:0005886;GO:0005886;GO:0009789;GO:0009789;	-	-	-	106310533	A0A0D3DJQ7
Bo2g011740	44.881072929391202	5.4880352603931	4.54866e-06	6.88143e-05	78.7978299574459	6.3000839942043	3.63668e-11	2.15892e-09	C2	3208354	3208575	+	222	-	-	-	-	-	-	-
Bo3g032300	5.9609737711786099	2.5755480253346099	4.55341e-06	6.88581e-05	0.30004209824715	-1.73676315859487	2.24738e-05	0.000361981	C3	12303896	12306848	-	1062	-	GO:0016491;GO:0016491;GO:0016491;GO:0046872;GO:0046872;GO:0055114;GO:0055114;GO:0055114;	-	-	-	106335851	A0A0D3B5K4
Bo3g184900	2.69514258664202	1.43036160084409	4.85809e-06	7.31091e-05	0.377873018495139	-1.4040265862735	1.52924e-05	0.000261636	C3	64364901	64366284	+	594	-	GO:0016020;GO:0016021;GO:0016021;	-	-	-	106329372	A0A0D3BN55
Bo6g095640	3.4433043526978202	1.78379370595047	4.89946e-06	7.36891e-05	0.114280669999149	-3.12934669531339	3.1387e-19	1.03883e-16	C6	30007994	30009254	-	1035	-	GO:0007165;GO:0007165;	-	-	-	106298364	A0A0D3CXQ6
Bo9g095440	2.8830527982079102	1.52759725758039	4.9006e-06	7.36891e-05	0.461825076332092	-1.11458158371179	0.000107729	0.00139607	C9	29724554	29727817	-	2226	-	GO:0016020;GO:0016021;GO:0016021;GO:0016491;GO:0016491;GO:0016491;GO:0055114;GO:0055114;GO:0055114;	K00521	EC:1.16.1.7	-	106318432	A0A0D3E9J5
Bo6g030880	4.3561746100004397	2.1230617832405398	5.03683e-06	7.5585e-05	0.337269971214444	-1.56802422096817	1.6966e-05	0.000286211	C6	7196463	7196669	-	207	-	-	-	-	-	106298772	A0A0D3CQJ0
Bo9g046510	3.7638792467426501	1.9122203440813199	5.26616e-06	7.87407e-05	0.309840484170834	-1.69040243398581	3.16998e-06	6.65679e-05	C9	15031039	15031500	-	333	-	GO:0005515;	-	-	-	-	-
Bo1g123670	Inf	Inf	5.27315e-06	7.87511e-05	2.49385379920082	1.31837689044808	0.00508855	0.0326548	C1	37047411	37050829	-	1767	-	GO:0003824;GO:0003824;GO:0008152;GO:0008152;	K18660	EC:6.2.1.-	-	106316369	A0A0D3AD69
Bo1g078730	2.7766569288922902	1.4733489353270099	5.34751e-06	7.97966e-05	0.347549626343306	-1.52470910102936	7.86758e-08	2.42301e-06	C1	23208179	23211189	-	1533	-	GO:0004144;GO:0004144;GO:0016020;GO:0016021;GO:0016021;GO:0045017;GO:0045017;	-	-	-	106322677	A0A0D3A9E3
Bo3g054810	2.9063888339907602	1.53922772820945	5.38137e-06	8.02376e-05	0.414590097416285	-1.27024243714489	1.35624e-05	0.000236189	C3	21603357	21604289	-	813	-	GO:0005783;GO:0005783;GO:0016020;GO:0016021;GO:0016021;GO:0043231;	-	-	-	106328495	A0A0D3B965
Bo5g141640	2.7756907193691398	1.4728468249441999	5.68218e-06	8.42409e-05	0.49088475855029	-1.02654372163476	0.000333207	0.00357896	C5	43943291	43945225	+	1110	-	-	-	-	-	106295721	A0A0D3CM30
Bo4g137920	6.6429091515084302	2.7318151842398199	5.88475e-06	8.71149e-05	2.09971551233127	1.07019387229528	0.00246523	0.0185316	C4	36736399	36740258	+	1755	-	GO:0000105;GO:0000105;GO:0000105;GO:0000107;GO:0000107;GO:0000107;GO:0003824;GO:0003824;GO:0003824;GO:0005737;GO:0005737;GO:0006541;GO:0006541;GO:0008152;GO:0008152;GO:0008152;GO:0008652;GO:0009507;GO:0009507;GO:0016740;GO:0016763;GO:0016763;GO:0016833;GO:0016833;GO:0016833;	K01663	-	-	106337126	A0A0D3BZU4
Bo1g009900	5.5588714686403797	2.4747920247021198	5.9781e-06	8.83913e-05	0.437686921453517	-1.19202881951459	0.0474528	0.176767	C1	3238037	3239835	-	879	-	GO:0000166;GO:0004672;GO:0004672;GO:0004674;GO:0004674;GO:0005524;GO:0005524;GO:0005524;GO:0006468;GO:0006468;GO:0007049;GO:0007049;	K08850	EC:2.7.11.1	-	106316140	A0A0D3A2G5
Bo3g057150	9.8057465888004298	3.2936274783475499	6.3412e-06	9.34259e-05	0.352528464171857	-1.50418834528607	0.00106596	0.00944486	C3	22254825	22259832	+	2727	-	GO:0003676;GO:0003676;GO:0003723;GO:0003723;GO:0004654;GO:0004654;GO:0006396;GO:0006396;GO:0006402;GO:0006402;	K00962	EC:2.7.7.8	-	106336024	A0A0D3B9K0
Bo5g034970	2.7279143624742002	1.4477983544892701	6.47365e-06	9.51138e-05	0.41822149114206	-1.25766089530461	6.58818e-06	0.00012533	C5	11521095	11521927	-	561	-	-	K14496	-	-	106292600	A0A0D3CC91
Bo3g017790	2.7785035911823699	1.47430810495554	6.52322e-06	9.58043e-05	0.441807736493859	-1.17850941294474	3.41415e-05	0.000522888	C3	5851040	5852908	+	1869	-	GO:0000145;GO:0000145;GO:0006887;GO:0006887;	-	-	-	106336000	A0A0D3B2J9
Bo2g133800	7.0364662891798799	2.81485108980212	6.93544e-06	0.000101538	0.289336558271816	-1.78917947260411	0.000942467	0.00850791	C2	41674431	41676702	-	1629	-	GO:0003333;GO:0006865;GO:0006865;GO:0015171;GO:0016020;GO:0016020;GO:0016020;GO:0016021;GO:0016021;GO:0016021;GO:0022857;GO:0022857;GO:0055085;GO:0055085;	-	-	-	-	-
Bo02109s010	14.171177136710901	3.8248876963867802	7.16435e-06	0.000104766	0.362272034873742	-1.46485465179593	0.00473748	0.0309272	Scaffold02109	32	1068	+	834	-	GO:0003677;GO:0003677;GO:0003677;GO:0005634;GO:0005634;GO:0006351;GO:0006351;GO:0006355;GO:0006355;GO:0006355;	-	-	-	106322542	A0A0D2ZVV6
Bo7g078740	13.0446345752136	3.7053846247911801	7.72987e-06	0.000112163	11.8600239718343	3.56803502079248	5.43991e-06	0.000106515	C7	30008687	30010413	-	1251	-	GO:0003333;GO:0015171;GO:0016020;GO:0016020;GO:0016020;GO:0016021;GO:0016021;GO:0022857;GO:0022857;GO:0055085;GO:0055085;	-	-	-	-	-
Bo9g171800	10.611745249650101	3.4075900419934899	8.32551e-06	0.00012028	2.37661585546282	1.24890873196957	0.0113083	0.0606005	C9	50682546	50684474	+	1434	-	GO:0004190;GO:0004190;GO:0004190;GO:0006508;GO:0006508;GO:0006508;GO:0008233;GO:0016787;	-	-	-	106312901	A0A0D3EGD4
Bo2g010050	2.6510923721617901	1.4065869389860199	8.42467e-06	0.000121383	0.366756585471482	-1.44710522376238	1.72565e-07	4.93548e-06	C2	2254402	2256303	-	1434	-	GO:0004190;GO:0004190;GO:0004190;GO:0006508;GO:0006508;GO:0006508;GO:0008233;GO:0016787;	-	-	-	106327738	A0A0D3AIH2
Bo2g013060	2.88176380654326	1.52695209502247	8.76236e-06	0.000125907	0.342098545773392	-1.54751612352044	1.68268e-07	4.83349e-06	C2	3961506	3962578	-	564	-	GO:0005829;GO:0005829;GO:0006662;GO:0006662;GO:0008047;GO:0008047;GO:0009507;GO:0009570;GO:0009570;GO:0009642;GO:0009642;GO:0015035;GO:0015035;GO:0043085;GO:0045454;GO:0045454;GO:0045454;GO:0055114;	K03671	-	-	106324740	A0A0D3AJC3
Bo5g055780	8.0746241425166794	3.0133951068223701	8.92365e-06	0.00012783	3.61966670230395	1.85585686054863	1.79749e-08	6.3421e-07	C5	17928093	17928499	-	324	-	GO:0009744;GO:0009744;GO:0009749;GO:0009749;GO:0009750;GO:0009750;	-	-	-	-	-
Bo5g015280	2.83508196190034	1.5033904439216099	8.92722e-06	0.000127832	0.268107062332748	-1.8991188723657	1.03281e-10	5.63078e-09	C5	5071206	5072634	+	801	-	-	-	-	-	106294930	A0A0D3C9G3
Bo5g007340	3.4298877314322098	1.7781613542532499	9.31345e-06	0.000132851	0.22324887881674	-2.16327516491417	1.35372e-10	7.21214e-09	C5	2313985	2315654	+	1137	-	GO:0005622;GO:0005622;GO:0006886;GO:0006886;	-	-	-	106292819	A0A0D3C816
Bo6g110420	2.8961228240218801	1.53412278814272	1.00607e-05	0.000142527	0.343584996106615	-1.54126105758212	2.45359e-07	6.77327e-06	C6	34486056	34487603	-	1257	-	-	-	-	-	106301067	A0A0D3CZE3
Bo3g151430	20.268432306354399	4.3411626004996098	1.03116e-05	0.000145749	0.155890347462521	-2.6813964939785	1.87754e-05	0.000312089	C3	53893246	53894124	-	879	-	-	-	-	-	106332135	A0A0D3BJI8
Bo3g002570	23.6275530311257	4.5623983203626199	1.03677e-05	0.000146431	0.165001819135979	-2.59944616469513	0.000301402	0.00330764	C3	748492	751752	-	1548	-	GO:0006486;GO:0006486;GO:0016020;GO:0016021;GO:0016021;GO:0016757;GO:0016757;	-	-	-	106332530	A0A0D3AZM2
Bo3g042030	3.9051796690432901	1.9653889252366199	1.04727e-05	0.000147857	0.314147241218033	-1.67048718422413	3.47655e-06	7.22349e-05	C3	17115944	17118314	+	1410	-	GO:0016020;GO:0016021;GO:0016021;GO:0016021;	-	-	-	-	-
Bo7g119170	2.6612779056140901	1.41211917256108	1.07545e-05	0.000151319	0.321639653395162	-1.63648281452109	6.50703e-09	2.51083e-07	C7	47984314	47985846	-	1533	-	GO:0004497;GO:0004497;GO:0005506;GO:0005506;GO:0016020;GO:0016021;GO:0016021;GO:0016491;GO:0016705;GO:0016705;GO:0020037;GO:0020037;GO:0046872;GO:0055114;GO:0055114;GO:0055114;	-	-	-	106301142	A0A0D3DIB9
Bo1g006000	4.9357109403716297	2.3032579056089602	1.09049e-05	0.000153089	2.22541719705299	1.15407582223552	0.000995549	0.00892677	C1	1702556	1703308	+	753	-	GO:0003676;GO:0003676;GO:0003677;GO:0003677;GO:0006355;GO:0006355;GO:0008270;GO:0008270;	K09250	-	-	106321069	A0A0D3A1M4
Bo9g154270	Inf	Inf	1.09363e-05	0.000153413	3.54704278585349	1.82661673274459	4.65203e-05	0.00068688	C9	45989222	45991173	-	1410	-	GO:0003676;GO:0003676;GO:0005777;GO:0005777;GO:0008270;GO:0008270;GO:0010468;GO:0010468;GO:0046872;	-	-	-	106315809	A0A0D3EE71
Bo5g050570	4.4672573779678499	2.1593893769203398	1.11685e-05	0.000156376	0.204685511673621	-2.28851910770125	3.38688e-08	1.13503e-06	C5	16915418	16916832	+	1155	-	GO:0016020;GO:0016021;GO:0016021;	-	-	-	106293367	-
Bo1g028370	2.88916012391911	1.53065016360566	1.19589e-05	0.000166565	0.4625012622861	-1.11247079176347	0.000815421	0.00755651	C1	9707196	9708280	-	909	-	GO:0005634;GO:0005634;GO:0005737;GO:0005829;GO:0005829;GO:0008152;GO:0008152;GO:0008168;GO:0008168;GO:0032259;	-	-	-	-	-
Bo3g035530	2.62986231682441	1.39498727098747	1.20685e-05	0.000167966	0.401804613405905	-1.31543396610832	2.7715e-06	5.89278e-05	C3	13810844	13813571	-	1128	-	GO:0009058;GO:0009058;GO:0016844;GO:0016844;	-	-	-	106329150	A0A0D3B678
Bo3g054790	2.6216117983560401	1.3904540707425701	1.22377e-05	0.00016997	0.198739724021842	-2.33104782813059	2.8592e-16	5.37358e-14	C3	21597639	21598895	+	873	-	GO:0015267;GO:0015267;GO:0016020;GO:0016020;GO:0016020;GO:0016021;GO:0016021;GO:0055085;GO:0055085;	K09872	-	-	106336322	A0A0D3B963
Bo1g093160	Inf	Inf	1.22399e-05	0.00016997	3.34961926683061	1.74399712151932	0.000259628	0.0029256	C1	27626295	27628112	+	801	-	GO:0003676;GO:0003676;GO:0003676;GO:0003723;GO:0003723;GO:0005634;GO:0008270;GO:0008270;GO:0009409;GO:0009409;GO:0009414;GO:0009414;GO:0016607;GO:0016607;GO:0045892;GO:0045892;GO:0048026;GO:0048026;	-	-	-	-	-
Bo00629s150	6.3567043633663003	2.6682789933512798	1.22685e-05	0.000170303	0.291328470292408	-1.77928139806886	5.09041e-05	0.000740496	Scaffold00629	145925	150301	-	2676	-	-	-	-	-	-	-
Bo5g034330	4.0413356597762604	2.0148321819058799	1.23383e-05	0.000171081	0.470924887700676	-1.08643112588434	0.000349611	0.0037281	C5	11063972	11066836	+	1419	-	GO:0008152;GO:0008152;GO:0016624;GO:0016624;GO:0055114;	K00166	EC:1.2.4.4	-	106295683	A0A0D3CC27
Bo7g107320	78.943233181753499	6.3027437020302299	1.24472e-05	0.000172335	0.15811929854653	-2.66091463472906	0.0028774	0.020892	C7	41926960	41931206	+	1785	-	GO:0003333;GO:0015171;GO:0016020;GO:0016020;GO:0016020;GO:0016021;GO:0016021;GO:0022857;GO:0022857;GO:0055085;GO:0055085;	-	-	-	106306719	A0A0D3DF84
Bo2g092800	34.086161633166597	5.0911142448324602	1.30723e-05	0.000179852	0.197247235470009	-2.34192301468238	0.000838918	0.00774131	C2	25290600	25292952	-	1419	-	GO:0016020;GO:0016021;GO:0016021;	K13946	-	-	106322914	A0A0D3ARA3
Bo04739s010	11.3019960793305	3.4985056887169499	1.34075e-05	0.000184395	0.372313519116941	-1.42541009188929	0.00551671	0.0348645	Scaffold04739	1	740	-	740	-	GO:0003676;GO:0003682;GO:0005524;GO:0007219;GO:0016020;GO:0016021;GO:0045892;	-	-	-	-	-
Bo3g018600	4.9098967562756197	2.2956926883332098	1.34602e-05	0.000185052	0.128420161722538	-2.96105637425205	1.31126e-11	8.49932e-10	C3	6251803	6253459	-	999	-	GO:0016020;GO:0016021;GO:0016021;	-	-	-	-	-
Bo1g003400	2.7845717388543498	1.4774554612311499	1.38934e-05	0.000190375	0.307152769548852	-1.70297170296961	8.09008e-09	3.03175e-07	C1	714014	715047	-	849	-	GO:0003677;GO:0003677;GO:0003677;GO:0003700;GO:0003700;GO:0005634;GO:0005634;GO:0006355;GO:0006355;GO:0043565;GO:0043565;	K09338	-	-	106341549	A0A0D3A163
Bo2g137120	5.1226624701119299	2.3568938364073801	1.4237e-05	0.000194652	0.0801522228831237	-3.64111365819104	8.763e-14	9.28431e-12	C2	43940211	43941167	-	579	-	GO:0009507;GO:0009507;	-	-	-	106325838	A0A0D3AVR3
Bo4g027420	8.2399675827691006	3.04263866164754	1.47238e-05	0.000200718	0.231636184631167	-2.11006745593716	1.90793e-05	0.000316041	C4	5747073	5748956	+	1416	-	GO:0016020;GO:0016021;GO:0016021;	-	-	-	-	-
Bo1g004770	2.5902830734218099	1.37310976830029	1.74146e-05	0.000233718	0.159820263435213	-2.64547775730893	4.90446e-20	2.10835e-17	C1	976293	979013	+	1509	-	GO:0004497;GO:0004497;GO:0005506;GO:0005506;GO:0016020;GO:0016021;GO:0016021;GO:0016491;GO:0016705;GO:0016705;GO:0020037;GO:0020037;GO:0046872;GO:0055114;GO:0055114;GO:0055114;	-	-	-	106312565	A0A0D3A1A1
Bo2g021930	6.2336979892703202	2.6400882608445002	1.74986e-05	0.000234677	2.3149084669429	1.21095514946897	0.000890893	0.00813669	C2	5701965	5703166	-	360	-	GO:0008270;GO:0008270;	K03868	EC:2.3.2.32	-	106325067	A0A0D3AK66
Bo6g048070	7.50441948782822	2.9077404749874001	1.75557e-05	0.000235253	2.650382997203	1.40620085335137	0.000163281	0.00198141	C6	13070570	13070839	-	270	-	-	-	-	-	106299496	A0A0D3CS21
Bo2g106430	14.196590947851901	3.8274726293291801	1.80743e-05	0.000241614	2.18127023642956	1.12516851578585	0.00623132	0.0382365	C2	31572491	31573952	-	672	-	GO:0003677;GO:0003680;GO:0005634;GO:0005654;GO:0005730;GO:0005737;GO:0005739;GO:0043565;GO:0098687;	-	-	-	-	-
Bo3g147610	2.6344290741022198	1.39749033901357	1.87364e-05	0.000249479	0.494265929946018	-1.01664063083724	0.000372309	0.00392235	C3	52606248	52607745	+	921	-	GO:0016020;GO:0016021;GO:0016021;	-	-	-	106328332	A0A0D3BJ04
Bo5g145480	54.912754302043901	5.7790693703699496	1.88617e-05	0.000250968	0.135221103631011	-2.88660776776537	0.000296579	0.00326813	C5	45108099	45110014	+	1341	-	-	K18636	-	-	106293268	A0A0D3CML6
Bo7g065730	3.4678068213008899	1.7940235335904	1.88724e-05	0.000251021	0.436669787727551	-1.19538537737911	0.00143656	0.0119901	C7	25413645	25415792	-	1404	-	GO:0000103;GO:0000103;GO:0004781;GO:0004781;GO:0004781;GO:0005739;GO:0005739;GO:0009507;GO:0009570;GO:0009570;	K13811	-	-	106301631	A0A0D3D8Q6
Bo2g012810	4.7933406504451703	2.2610314722423501	1.9081e-05	0.000253523	0.106695479421333	-3.22842904294794	9.51867e-13	7.98203e-11	C2	3815932	3816897	-	966	-	GO:0005515;GO:0005622;GO:0005622;GO:0005634;GO:0005634;GO:0008270;GO:0008270;	-	-	-	106323080	A0A0D3AJ98
Bo01011s010	4.1660994040582704	2.0586972628137499	2.02292e-05	0.000267727	0.205751427836325	-2.28102565245316	7.94555e-09	2.98657e-07	Scaffold01011	12692	13914	-	750	-	GO:0005576;GO:0005576;GO:0005576;GO:0005618;GO:0005618;GO:0006949;GO:0006949;GO:0009664;GO:0009664;GO:0009828;GO:0009828;GO:0016020;GO:0016020;	-	-	-	106320674	-
Bo9g009100	5.6153538546949804	2.4893769377333501	2.06438e-05	0.000272633	5.59645133674365	2.48451231615257	8.69177e-05	0.00116014	C9	2408152	2410825	-	1497	-	GO:0004657;GO:0004657;GO:0006560;GO:0006562;GO:0006562;GO:0016491;GO:0055114;	K00318	EC:1.5.-.-	-	106315443	A0A0D3E0Q5
Bo8g084840	5.7858119395034198	2.53251943105266	2.11041e-05	0.000277923	0.375324512345485	-1.41378957955071	0.000695422	0.00662982	C8	29242189	29242794	+	606	-	-	-	-	-	106309539	A0A0D3DT27
Bo9g007900	10.859666961768299	3.44090795493823	2.12582e-05	0.000279772	2.03077925616521	1.0220334285343	0.0467171	0.174774	C9	1759376	1762615	-	1545	-	GO:0004497;GO:0004497;GO:0005506;GO:0005506;GO:0016020;GO:0016021;GO:0016021;GO:0016491;GO:0016705;GO:0016705;GO:0020037;GO:0020037;GO:0046872;GO:0055114;GO:0055114;GO:0055114;	-	-	-	106318709	A0A0D3E0D5
Bo4g147110	5.5618356028543197	2.47556110202872	2.14e-05	0.000281422	0.265351290124896	-1.91402453180859	0.00471147	0.0308435	C4	40067293	40068598	-	1095	-	GO:0016747;GO:0016747;	-	-	-	-	-
Bo4g194720	2.8689585063752299	1.5205271026204901	2.16312e-05	0.00028416	2.54420936917038	1.34721739838761	0.00560381	0.0352714	C4	52488121	52489572	+	1185	-	GO:0004650;GO:0004650;GO:0005576;GO:0005576;GO:0005975;GO:0005975;GO:0008152;GO:0016787;GO:0016798;GO:0071555;GO:0071555;	K01184	EC:3.2.1.15	-	106342347	A0A0D3C659
Bo1g025790	2.60163017656427	1.37941589658429	2.30119e-05	0.000300812	0.382196619691901	-1.38761307631898	1.40498e-06	3.22766e-05	C1	9320002	9322428	+	1719	-	GO:0004672;GO:0004672;GO:0005509;GO:0005509;GO:0005524;GO:0005524;GO:0006468;GO:0006468;	K13412	EC:2.7.11.1	-	106308615	A0A0D3A511
Bo4g111490	2.7012891386745101	1.4336480702823999	2.30978e-05	0.000301617	0.409234758048214	-1.28899941037547	9.87235e-06	0.00017941	C4	28504971	28507353	-	1035	-	GO:0005515;	-	-	-	-	-
Bo3g157370	11.907452195129199	3.57379285161042	2.36322e-05	0.000307409	0.288821253213018	-1.79175118653744	0.00141978	0.0118738	C3	56352918	56353880	+	963	-	GO:0005730;GO:0005730;GO:0009553;GO:0009553;GO:0030863;GO:0030863;GO:0045892;GO:0045892;GO:0045892;	-	-	-	106332414	A0A0D3BKD5
Bo3g087080	2.5487768755072699	1.3498050827800301	2.49385e-05	0.000322709	0.370166929670549	-1.43375208279999	3.58475e-07	9.49503e-06	C3	32139541	32141089	+	1206	-	GO:0003824;GO:0003824;	K00830	-	-	106335155	A0A0D3BDK9
Bo2g024120	3.0135084818108901	1.5914441254027101	2.74965e-05	0.000353231	0.400096344792974	-1.32158064634166	2.42583e-05	0.000386892	C2	6553015	6555453	-	1425	-	GO:0003824;GO:0003824;GO:0008152;GO:0008152;GO:0009507;GO:0009507;	K22200	EC:3.1.3.63	-	106319629	-
Bo8g050440	4.28849740059347	2.1004722462230898	2.79323e-05	0.000357964	4.41609629314457	2.1427716304783	0.0215747	0.098981	C8	16636252	16637670	-	1221	-	GO:0016829;GO:0030570;GO:0030570;GO:0045490;GO:0045490;GO:0046872;GO:0046872;	K01728	EC:4.2.2.2	-	106307150	A0A0D3DMS1
Bo9g019130	2.8474408769689901	1.5096658867484301	2.81378e-05	0.000360102	2.64003273955427	1.40055582083362	4.18107e-06	8.469e-05	C9	6122522	6124682	+	1689	-	GO:0005515;	-	-	-	106319022	A0A0D3E2G2
Bo5g085130	4.5924139616620296	2.1992526928671099	2.85851e-05	0.000365073	2.05987317395432	1.04255551365131	0.012548	0.0655806	C5	27432309	27437206	+	2484	-	GO:0004672;GO:0004672;GO:0005524;GO:0005524;GO:0006468;GO:0006468;GO:0016020;GO:0016021;GO:0016021;	-	-	-	-	-
Bo7g097970	4.5720168004294104	2.1928307049197699	2.87616e-05	0.000367045	0.230083147846401	-2.11977277585719	1.32853e-06	3.06331e-05	C7	38195330	38199577	+	2175	-	GO:0003824;GO:0003824;GO:0008152;GO:0008152;	-	-	-	106306130	A0A0D3DDE6
Bo1g019560	4.1949448756894201	2.0686518528362501	2.92816e-05	0.000372562	0.429911261419868	-1.21788919302904	0.00704559	0.0418993	C1	6898452	6898697	-	246	-	GO:0016020;GO:0016021;GO:0016021;	-	-	-	106318839	A0A0D3A435
Bo1g134630	2.4860203941007999	1.3138381316065699	2.94634e-05	0.000374235	0.351142613802599	-1.50987100612788	6.15074e-08	1.94617e-06	C1	38681778	38684105	+	2328	-	GO:0004252;GO:0004252;GO:0006508;GO:0006508;GO:0006508;GO:0008233;GO:0008236;GO:0016787;	-	-	-	106317378	A0A0D3ADS4
Bo6g067800	3.0618272180940198	1.6143928724418499	2.95247e-05	0.000374887	2.4509896074595	1.29336436698793	3.31219e-05	0.000509149	C6	19156864	19160674	+	1776	-	GO:0000413;GO:0003755;GO:0003755;GO:0005515;GO:0016020;GO:0016021;GO:0016021;GO:0016853;GO:0030154;GO:0030154;GO:0042761;GO:0042761;GO:0099402;GO:0099402;	-	-	-	-	-
Bo7g106500	Inf	Inf	2.99247e-05	0.000379434	0.175535329486111	-2.51016666809083	0.00155801	0.0128318	C7	41344242	41346879	+	2022	-	GO:0003676;GO:0003676;GO:0005777;GO:0005777;GO:0010468;GO:0010468;	-	-	-	106303318	A0A0D3DF02
Bo6g081070	9.2246054832435291	3.2054872114940101	3.04238e-05	0.000385382	0.320333262752356	-1.64235448248723	0.00128469	0.010959	C6	24944694	24945955	-	1113	-	-	-	-	-	106299647	A0A0D3CVU1
Bo2g068110	Inf	Inf	3.09162e-05	0.00039122	2.05156509938519	1.03672493393802	0.0426048	0.163441	C2	19835237	19835548	-	312	-	-	-	-	-	-	-
Bo2g061350	4.7814732804059199	2.2574552137803501	3.20779e-05	0.000404956	0.280670079621016	-1.83305281900672	1.07006e-05	0.000192682	C2	18060788	18061393	+	453	-	-	-	-	-	-	-
Bo7g107870	Inf	Inf	3.2837e-05	0.000412859	3.37907642645638	1.7566289811092	0.000184732	0.00219892	C7	42299718	42307743	-	3498	-	GO:0000049;GO:0000049;GO:0000166;GO:0000166;GO:0000166;GO:0002161;GO:0002161;GO:0004812;GO:0004812;GO:0004812;GO:0004822;GO:0004822;GO:0005524;GO:0005524;GO:0005524;GO:0005737;GO:0005737;GO:0006412;GO:0006418;GO:0006418;GO:0006428;GO:0006428;GO:0006450;GO:0016874;GO:0106074;	-	-	-	-	-
Bo1g057030	3.5025552210675999	1.80840779627561	3.32807e-05	0.000418014	0.183544852488676	-2.44579544023303	1.86035e-09	7.89753e-08	C1	16915192	16916649	-	1458	-	GO:0008152;GO:0008152;GO:0016740;GO:0016757;GO:0016758;GO:0016758;	-	-	-	106311042	A0A0D3A806
Bo1g103720	4.7741611439149203	2.2552472630270102	3.41775e-05	0.00042841	0.306590241260384	-1.70561631801236	2.52722e-05	0.00040101	C1	31653519	31656152	+	1032	-	GO:0000166;GO:0000166;GO:0000166;GO:0003677;GO:0003677;GO:0005524;GO:0005524;GO:0005524;GO:0005634;GO:0005634;GO:0006259;GO:0006259;GO:0006281;GO:0006281;GO:0007131;GO:0007131;GO:0008094;GO:0008094;	K10872	-	-	106341492	A0A0D3ABG0
Bo8g070900	6.8781208682685904	2.7820144683682702	3.65172e-05	0.00045498	0.151477923201037	-2.72282054811474	1.54437e-07	4.47399e-06	C8	23352720	23354860	+	1029	-	GO:0008152;GO:0008152;GO:0016624;GO:0016624;GO:0055114;	-	-	-	-	-
Bo7g078660	9.9162774003542307	3.3097986302908802	3.82391e-05	0.000474027	0.210107666237745	-2.25079929203205	0.000106047	0.00137571	C7	29925292	29926263	-	549	-	GO:0016787;GO:0016787;	K07766	EC:3.6.1.52	-	106301668	A0A0D3DA57
Bo9g135560	2.5557847306793202	1.35376632569792	3.83669e-05	0.00047532	0.216524411922337	-2.20739840492913	2.6788e-14	3.16047e-12	C9	41681462	41682732	+	1095	-	GO:0016740;GO:0016765;GO:0016765;	K11778	EC:2.5.1.87	-	106313585	A0A0D3ECI7
Bo9g094320	6.6198472913467103	2.7267979368877899	3.9019e-05	0.000482757	0.368303986396605	-1.44103108232664	0.00189562	0.0150299	C9	29378840	29380218	+	1050	-	GO:0008168;GO:0008168;GO:0008168;GO:0008171;GO:0008171;GO:0016740;GO:0032259;GO:0046983;GO:0046983;	-	-	-	-	-
Bo5g155160	Inf	Inf	4.05921e-05	0.000500555	3.44261306780643	1.78350403843717	0.000209492	0.00244309	C5	46716432	46717703	+	1272	-	GO:0016020;GO:0016021;GO:0016021;	-	-	-	-	-
Bo5g099880	2.45677408718183	1.29676520068456	4.34431e-05	0.000533414	0.28862823132767	-1.79271567515368	2.04211e-10	1.0549e-08	C5	32207321	32209362	+	1830	-	GO:0016020;GO:0016020;GO:0016020;GO:0016021;GO:0016021;GO:0022857;GO:0022857;GO:0055085;GO:0055085;	-	-	-	-	-
Bo4g173300	3.5625106436462701	1.83289432448411	4.42744e-05	0.000542012	2.30637033069829	1.20562418313963	3.41128e-05	0.000522719	C4	45979738	45983537	+	2406	-	GO:0005515;	-	-	-	106342179	-
Bo1g107190	6.1254793090607498	2.6148227371356199	4.4915e-05	0.000548591	0.445838731172193	-1.16540614216839	0.00250592	0.0187331	C1	33105324	33106960	+	705	-	GO:0005737;GO:0005737;GO:0120009;GO:0120009;GO:0120013;GO:0120013;	K08051	-	-	106294562	A0A0D3ABV9
Bo8g102250	3.17261922221285	1.6656743793740001	4.49932e-05	0.000549366	0.29111710056882	-1.7803285072947	3.80397e-06	7.80836e-05	C8	35996333	35997750	+	843	-	GO:0003824;GO:0003824;GO:0004722;GO:0004722;GO:0006470;GO:0006470;	K17506	EC:3.1.3.16	-	106310071	A0A0D3DWC4
Bo2g166450	2.5288713173724102	1.3384936267551999	4.62441e-05	0.00056353	0.449312772822037	-1.15420802028377	0.000100794	0.00131799	C2	52213177	52215497	+	354	-	-	-	-	-	106322703	A0A0D3AYR5
Bo01714s010	18.132188309922402	4.1804811442583398	4.73476e-05	0.000575469	2.09840809892134	1.06929528088705	0.0144224	0.0730197	Scaffold01714	4962	5697	+	357	-	-	-	-	-	-	-
Bo5g049080	2.4525685809889999	1.2942934789804501	4.88104e-05	0.00059151	0.263744543519132	-1.92278684796543	9.51019e-12	6.32884e-10	C5	16357118	16361205	-	1860	-	GO:0016020;GO:0016020;GO:0016020;GO:0016021;GO:0016021;GO:0022857;GO:0022857;GO:0055085;GO:0055085;	-	-	-	106295019	A0A0D3CDR1
Bo3g101180	2.9572343492132198	1.5642485759070299	4.88433e-05	0.000591716	0.345406933663923	-1.53363105121521	3.17538e-06	6.66437e-05	C3	36213480	36216536	+	2376	-	GO:0004553;GO:0004553;GO:0005975;GO:0005975;GO:0016787;	K15920	EC:3.2.1.37	-	106335218	A0A0D3BF28
Bo4g187640	5.2464670043000998	2.3913462320788601	5.22707e-05	0.000629753	0.375760577967823	-1.41211437712785	0.00634204	0.038728	C4	50260700	50261555	-	570	-	GO:0005886;GO:0005886;GO:0005886;GO:0016020;GO:0016021;GO:0016021;	-	-	-	106342988	A0A0D3C4Z8
Bo4g133280	2.7307323979257299	1.44928794204113	5.25923e-05	0.000633217	0.373526304143053	-1.42071825208569	2.95317e-06	6.24003e-05	C4	34229671	34230885	-	1215	-	GO:0009507;GO:0009507;	-	-	-	106342835	A0A0D3BZ28
Bo3g101310	2.6573337451622598	1.40997943304218	5.30035e-05	0.000637343	0.492795042947186	-1.02094035093142	0.000635043	0.0061722	C3	36335099	36336571	+	1473	-	GO:0005515;	-	-	-	106336122	A0A0D3BF41
Bo8g011670	10.5746413049417	3.40253682240674	5.61827e-05	0.000670373	2.66912861899302	1.41636882721555	0.000454785	0.00467151	C8	2497946	2498418	-	336	-	GO:0003735;GO:0003735;GO:0005622;GO:0005622;GO:0005840;GO:0005840;GO:0006412;GO:0006412;	K02961	-	-	106307440	A0A0D3DJL6
Bo12079s010	3.9522514694214199	1.9826747440241199	5.73237e-05	0.000682857	0.481759986569627	-1.05361352193119	0.00493974	0.0319402	Scaffold12079	64	465	+	402	-	-	-	-	-	-	-
Bo1g057410	2.6025306072947001	1.3799151305689299	5.79632e-05	0.000689363	0.381508680918146	-1.39021221010784	2.5923e-06	5.54963e-05	C1	17301560	17305213	+	1896	-	GO:0004004;GO:0004004;GO:0005739;GO:0005739;GO:0009555;GO:0009555;GO:0009561;GO:0009561;GO:0016070;GO:0016070;GO:0016817;GO:0016817;GO:0032508;	-	-	-	-	-
Bo2g089980	6.7767362981803796	2.7605906332332699	5.82668e-05	0.000691913	0.267519959513804	-1.9022815606919	9.67895e-05	0.00127015	C2	24418219	24420207	+	1149	-	GO:0005515;	-	-	-	106322864	A0A0D3AR19
Bo9g175480	2.7410594083385602	1.4547335967469199	5.84647e-05	0.000693821	4.87472137068798	2.28531975965926	2.89114e-06	6.12281e-05	C9	52035438	52037630	+	1416	-	GO:0006520;GO:0006520;GO:0016491;GO:0016491;GO:0016491;GO:0016639;GO:0016639;GO:0055114;GO:0055114;GO:0055114;	K00261	EC:1.4.1.3	-	106313607	A0A0D3EH53
Bo2g024230	Inf	Inf	6.04499e-05	0.00071601	2.56525752073894	1.35910366218481	0.00839338	0.0479475	C2	6620604	6621606	+	636	-	-	-	-	-	-	-
Bo6g050830	25.831685155012401	4.69106985702226	6.05085e-05	0.000716248	0	-Inf	5.33034e-11	3.06699e-09	C6	13932026	13932297	-	180	-	-	-	-	-	-	-
Bo2g002770	5.1654159066506198	2.3688845160419998	6.14031e-05	0.000725914	0.291767353529849	-1.77710962881966	4.17157e-05	0.000625318	C2	519985	521360	-	1080	-	GO:0016747;GO:0016747;	-	-	-	106322870	A0A0D3AHJ0
Bo6g112210	2.4679616400184399	1.30331997058731	6.16844e-05	0.000728326	0.390043847325026	-1.3582917792135	1.62265e-06	3.678e-05	C6	35043261	35044173	+	699	-	-	-	-	-	106300858	A0A0D3CZM3
Bo01158s030	63.878288733819602	5.9972537591032999	6.22869e-05	0.00073424	0.161578364151597	-2.62969406524397	0.000693744	0.00661719	Scaffold01158	7110	7481	+	372	-	-	-	-	-	106320977	A0A0D2ZTY3
Bo1g153440	2.5720976736242802	1.3629454290491401	6.36009e-05	0.000748095	0.447564183366849	-1.15983350662162	7.39454e-05	0.00101638	C1	42869749	42873374	+	2112	-	GO:0004672;GO:0004672;GO:0005524;GO:0005524;GO:0006468;GO:0006468;	-	-	-	106335619	A0A0D3AFR7
Bo2g092440	2.4729427511794499	1.3062288416099701	6.38051e-05	0.000749786	0.303872956482773	-1.71845980859002	3.06973e-09	1.25748e-07	C2	24884405	24887255	-	2109	-	GO:0004672;GO:0004672;GO:0005524;GO:0005524;GO:0006468;GO:0006468;GO:0006950;GO:0006950;	-	-	-	106327255	A0A0D3AR67
Bo3g001180	Inf	Inf	6.5195e-05	0.00076467	3.93959374306909	1.97804686443329	2.23406e-05	0.000360788	C3	82032	86509	+	2859	-	GO:0000166;GO:0004672;GO:0004672;GO:0004674;GO:0004674;GO:0005515;GO:0005524;GO:0005524;GO:0005524;GO:0006468;GO:0006468;GO:0016020;GO:0016021;GO:0016021;GO:0016301;GO:0016310;GO:0016740;	-	-	-	106331332	A0A0D3AZ83
Bo5g049120	2.7661749739066499	1.46789241679333	6.53738e-05	0.000766525	0.223440834724159	-2.16203522656612	9.34294e-12	6.26211e-10	C5	16431138	16432223	+	756	-	-	-	-	-	106292850	A0A0D3CDR5
Bo7g009580	3.5384999115915501	1.8231378832531899	6.65712e-05	0.000778603	3.79817831159638	1.92530763671891	4.09393e-06	8.31684e-05	C7	2763109	2767133	+	975	-	GO:0003824;GO:0003824;	-	-	-	-	-
Bo3g149340	2.70661463365209	1.43648949202415	6.79015e-05	0.000792523	0.443541129635418	-1.17286020283052	0.000131385	0.0016469	C3	53181913	53185377	+	1731	-	GO:0004672;GO:0004672;GO:0005524;GO:0005524;GO:0006468;GO:0006468;	-	-	-	106336277	A0A0D3BJ78
Bo2g068440	2.6089789283495102	1.38348529214754	6.82389e-05	0.000795607	0.377418035801766	-1.40576472775176	2.10569e-06	4.64344e-05	C2	20126669	20127902	+	930	-	GO:0016020;GO:0016021;GO:0016021;	-	-	-	106324897	-
Bo7g062450	3.4666116840378498	1.7935262406686401	6.88319e-05	0.000801516	0.39226309945157	-1.35010646873093	0.0186271	0.088825	C7	23449093	23451877	-	1407	-	GO:0005215;GO:0005215;GO:0016020;GO:0016020;GO:0016020;GO:0016021;GO:0016021;GO:0016021;GO:0022857;GO:0022857;GO:0055085;GO:0055085;	K08145	-	-	106307069	A0A0D3D827
Bo1g116120	4.21281448416876	2.0747843866662201	6.98074e-05	0.000812114	0.358511103116381	-1.47991029489214	0.000156233	0.00191264	C1	34990015	34992921	+	1596	-	GO:0005215;GO:0005215;GO:0015749;GO:0015752;GO:0015753;GO:0015757;GO:0015793;GO:0015795;GO:0015797;GO:0015798;GO:0015992;GO:0016020;GO:0016020;GO:0016020;GO:0016021;GO:0016021;GO:0016021;GO:0022857;GO:0022857;GO:0055085;GO:0055085;GO:1904659;	-	-	-	106316512	A0A0D3ACF9
Bo3g027270	2.5277309232904299	1.3378428969424401	7.02663e-05	0.000816942	0.382407695881403	-1.38681653731605	2.42581e-06	5.24121e-05	C3	10169180	10170010	+	297	-	GO:0009642;GO:0009642;	-	-	-	106331518	-
Bo01158s040	3.6255490325200701	1.8581994852010699	7.0432e-05	0.000818101	0.159157057886253	-2.65147695958037	2.8276e-07	7.70229e-06	Scaffold01158	10611	11425	-	642	-	GO:0005515;GO:0016740;	K00799	EC:2.5.1.18	-	106320974	A0A0D2ZTY4
Bo3g107600	3.3444054260179099	1.7417497489293801	7.0839e-05	0.000822315	0.316313254349675	-1.66057408508356	2.64893e-06	5.65468e-05	C3	38071411	38072822	+	1053	-	GO:0003677;GO:0003677;	K09422	-	-	106329182	A0A0D3BFS4
Bo4g150910	Inf	Inf	7.19981e-05	0.000833172	2.77718907054045	1.47362539892333	0.00365269	0.0252515	C4	40828561	40829265	+	285	-	-	-	-	-	-	-
Bo9g008900	2.4531051776241299	1.2946090912064701	7.20752e-05	0.000833546	0.119275036149649	-3.06763597131583	4.99855e-25	4.45109e-22	C9	2290928	2292118	-	765	-	GO:0007165;GO:0007165;	-	-	-	106315692	A0A0D3E0N5
Bo6g018220	3.96301758330427	1.98659936833784	7.25995e-05	0.000838836	0.39099009680066	-1.35479602821794	0.000391726	0.00410265	C6	3693750	3694965	+	831	-	-	-	-	-	106298528	A0A0D3CPG5
Bo5g007030	2.6394828413244702	1.40025528740784	7.26002e-05	0.000838836	0.398823173162927	-1.32617885657563	1.17957e-05	0.000210276	C5	2179963	2182199	+	1083	-	GO:0046983;GO:0046983;	-	-	-	106343517	A0A0D3C7Y5
Bo8g051010	17.386230626045201	4.1198732818987001	7.53093e-05	0.000866372	0.310182386090549	-1.68881133056786	0.00467175	0.0306532	C8	16999742	17000156	+	333	-	GO:0005886;GO:0005886;GO:0016020;GO:0016021;GO:0016021;	-	-	-	-	-
Bo2g025420	3.01778034052007	1.59348779818551	7.67062e-05	0.000879994	0.282667044736528	-1.82282440120041	5.73643e-08	1.83057e-06	C2	7700750	7702389	+	675	-	GO:0005783;GO:0005789;GO:0005789;GO:0006629;GO:0006631;GO:0006633;GO:0006633;GO:0016020;GO:0016021;GO:0016021;GO:0016829;GO:0102158;GO:0102158;GO:0102343;GO:0102343;GO:0102344;GO:0102344;GO:0102345;GO:0102345;	K10703	EC:4.2.1.134	-	106325112	A0A0D3AKW6
Bo6g111030	2.8699984419951798	1.52104995372102	7.69383e-05	0.000882384	0.415749779681358	-1.26621259590325	0.000709415	0.00673279	C6	34954798	34958484	+	1686	-	GO:0004672;GO:0004672;GO:0005524;GO:0005524;GO:0006468;GO:0006468;	-	-	-	-	-
Bo4g026640	2.63709072277253	1.3989472045140401	7.74443e-05	0.000887367	0.492260706855872	-1.02250550925849	0.000693199	0.00661537	C4	5155126	5156283	-	909	-	GO:0004017;GO:0004017;GO:0005524;GO:0005524;GO:0006139;GO:0006139;GO:0016301;GO:0016310;GO:0016740;GO:0016776;GO:0016776;GO:0019205;GO:0019205;GO:0046939;GO:0046940;	K00939	EC:2.7.4.3	-	106342390	A0A0D3BQN6
Bo1g083500	7.9532610926506999	2.99154653303993	7.91012e-05	0.000905237	2.79469718239318	1.4826919692483	0.00242694	0.0183332	C1	24157282	24158605	-	1059	-	GO:0005634;GO:0005634;	K14505	-	-	106342277	A0A0D3A9M4
Bo8g027110	2.4396821699181399	1.2866932126449999	7.94464e-05	0.00090835	0.436524827200635	-1.19586438591089	2.79505e-05	0.000438853	C8	7734175	7736427	+	1743	-	GO:0015031;GO:0015031;	K19476	-	-	106311609	A0A0D3DKM2
Bo1g141540	2.6021490979150301	1.3797036279511801	7.96059e-05	0.000909614	0.138188970311927	-2.85528562468437	1.19927e-19	4.67217e-17	C1	40590792	40593293	+	1698	-	GO:0004857;GO:0004857;GO:0005618;GO:0005618;GO:0016787;GO:0030599;GO:0030599;GO:0030599;GO:0042545;GO:0042545;GO:0042545;GO:0043086;GO:0045330;GO:0045330;GO:0045490;GO:0045490;	-	-	-	-	-
Bo5g015210	6.53598612172578	2.70840492012089	8.05686e-05	0.000918922	0.222287973223336	-2.16949820068542	2.72503e-05	0.000430027	C5	4992343	4993368	-	1026	-	GO:0003677;GO:0003677;GO:0003677;GO:0003700;GO:0003700;GO:0005634;GO:0005634;GO:0006351;GO:0006351;GO:0006355;GO:0006355;GO:0006355;	K09287	-	-	106343158	A0A0D3C9F6
Bo3g006920	2.4022348182992599	1.26437718128413	8.25042e-05	0.000939845	0.461485401030552	-1.11564308557311	7.57347e-05	0.00103716	C3	2430225	2430893	+	669	-	-	-	-	-	106328258	A0A0D3B0K8
Bo3g027380	Inf	Inf	8.29757e-05	0.000944928	2.26125292310246	1.17712236780735	0.0206898	0.095957	C3	10227299	10233093	-	831	-	-	-	-	-	-	-
Bo9g154690	2.50543649244542	1.3250619689408101	8.4899e-05	0.000963881	0.379681543979931	-1.39713822249281	1.84609e-06	4.13931e-05	C9	46316955	46322831	-	2271	-	GO:0006629;GO:0006629;GO:0016787;GO:0016787;	-	-	-	-	-
Bo9g004160	2.3669302790601501	1.2430172102822501	8.54707e-05	0.000969189	0.415038462487311	-1.26868305464839	5.5866e-06	0.000108936	C9	670892	672924	+	1074	-	GO:0004197;GO:0004197;GO:0004197;GO:0005773;GO:0005773;GO:0005829;GO:0005829;GO:0006508;GO:0006508;GO:0008234;GO:0008234;GO:0050790;GO:0050790;	K01363	EC:3.4.22.1	-	106313065	A0A0D3DZV9
Bo7g087230	5.52086152635417	2.4648934160642	8.89851e-05	0.00100323	0.382537201222825	-1.386328040128	0.00182368	0.0145707	C7	33823714	33825842	+	669	-	GO:0005789;GO:0005789;GO:0016020;GO:0016021;GO:0016021;	K20352	-	-	106306825	A0A0D3DBG8
Bo9g133380	2.3566421510187099	1.23673270634137	8.90861e-05	0.00100407	0.459894027603801	-1.12062663255183	6.11794e-05	0.000864416	C9	40839013	40841874	+	1476	-	GO:0005773;GO:0005774;GO:0005774;GO:0005783;GO:0005783;GO:0005794;GO:0005794;GO:0005975;GO:0005975;GO:0005975;GO:0006098;GO:0006098;GO:0009045;GO:0009045;GO:0009045;GO:0016853;GO:0042732;GO:0042732;GO:0046872;GO:0046872;	K01805	EC:5.3.1.5	-	106318390	A0A0D3EC68
Bo2g075410	3.36559390612224	1.7508611110208701	8.97298e-05	0.00101014	0.405260969839014	-1.30307685690976	0.000754403	0.00708733	C2	21177726	21179688	+	1728	-	-	-	-	-	106327411	A0A0D3AQ01
Bo3g047030	6.1690055622758004	2.6250379470731202	9.00154e-05	0.00101301	2.02788552784899	1.01997621591831	0.010023	0.0551021	C3	19517668	19518368	+	366	-	GO:0016020;GO:0016021;GO:0016021;	-	-	-	-	-
Bo3g023310	2.59075076029773	1.3733702296522401	9.09682e-05	0.00102218	0.419694396465702	-1.25258889362473	2.44441e-05	0.000389356	C3	8392845	8393459	+	615	-	GO:0016853;GO:0016853;GO:0097367;GO:0097367;GO:1901135;GO:1901135;	-	-	-	106328293	A0A0D3B3V2
Bo6g050780	3.9397245176709501	1.97809475382254	9.10127e-05	0.00102237	0.401676741196081	-1.31589316930819	0.0289182	0.12359	C6	13853563	13855967	+	1119	-	GO:0016788;GO:0016788;	-	-	-	106298267	A0A0D3CS94
Bo9g027400	Inf	Inf	9.26268e-05	0.00103894	7.98035448169964	2.99645283136388	0.00751559	0.0440224	C9	8597143	8598371	-	522	-	-	-	-	-	106316498	-
Bo5g098600	4.83180521130478	2.2725622952364501	9.94622e-05	0.00110793	0.172569087767988	-2.53475403661558	3.73637e-08	1.24214e-06	C5	31902997	31903374	+	378	-	GO:0005622;GO:0005622;GO:0008270;GO:0008270;	-	-	-	106294034	A0A0D3CHE9
Bo8g076580	2.6058846296414799	1.3817732128667	0.000100112	0.00111316	0.243043499456732	-2.04071354717087	3.26165e-05	0.000502619	C8	24653930	24656689	-	1617	-	GO:0005524;GO:0005739;GO:0008152;GO:0008152;GO:0009507;GO:0016491;GO:0016491;GO:0016491;GO:0016620;GO:0016620;GO:0046686;GO:0055114;GO:0055114;GO:0055114;	K00128	EC:1.2.1.3	-	106311632	A0A0D3DR99
Bo2g011610	13.3028826157081	3.7336669936043498	0.000107534	0.00118648	0.442859196222375	-1.17508001732881	0.0363606	0.146004	C2	3151970	3154628	-	1560	-	GO:0016020;GO:0016021;GO:0016021;	-	-	-	106327740	A0A0D3AIX8
Bo2g007050	11.324065560113899	3.5013201016789601	0.000109292	0.00120444	0.336336049903876	-1.57202467364946	0.00213146	0.0165182	C2	1240015	1240690	+	576	-	GO:0003677;GO:0003677;GO:0003677;GO:0005634;GO:0005634;	-	-	-	106326031	A0A0D3AHX1
Bo8g058660	Inf	Inf	0.000113108	0.00124135	2.16856433368738	1.11674024353073	0.044464	0.168605	C8	18974620	18975578	-	876	-	GO:0005739;GO:0016020;GO:0016021;GO:0016021;GO:0051560;	K20858	-	-	106310730	A0A0D3DNP8
Bo4g151060	2.5862594347806098	1.37086700310563	0.000115676	0.00126767	0.452080696008709	-1.14534777945806	0.000146357	0.00180592	C4	41015205	41017166	-	1962	-	GO:0016020;GO:0016021;GO:0016021;	-	-	-	106342325	A0A0D3C1B6
Bo6g030940	2.4888895277057199	1.31550219602078	0.000117195	0.0012828	0.245150598748749	-2.02825980966272	3.9149e-08	1.29573e-06	C6	7236614	7237773	-	951	-	GO:0003677;GO:0003677;GO:0003677;GO:0003700;GO:0003700;GO:0005634;GO:0005634;GO:0006351;GO:0006351;GO:0006355;GO:0006355;GO:0006355;GO:0009414;GO:0009414;	-	-	-	106296711	A0A0D3CQJ6
Bo7g066890	3.2649737038356501	1.7070713723234101	0.000118389	0.00129435	0.408782023794295	-1.29059633978855	0.000245037	0.00279232	C7	25644740	25646121	-	897	-	GO:0009505;GO:0009505;GO:0009506;GO:0009506;GO:0010497;GO:0010497;GO:0016020;GO:0016021;GO:0016021;GO:0046739;GO:0046739;	-	-	-	106302099	A0A0D3D8S3
Bo9g134980	3.50439606381333	1.8091658362999901	0.000122384	0.00133216	0.280569262782841	-1.83357112890785	5.20472e-05	0.000753899	C9	41344347	41346516	-	1332	-	GO:0003824;GO:0003824;GO:0005975;GO:0005975;GO:0006108;GO:0006108;GO:0016491;GO:0016491;GO:0016615;GO:0016615;GO:0016616;GO:0016616;GO:0046554;GO:0046554;GO:0055114;GO:0055114;	-	-	-	-	-
Bo3g175430	2.3297899656785401	1.2201998994579899	0.000126115	0.00137116	0.129910247281132	-2.94441286026331	2.73717e-24	2.32659e-21	C3	61443158	61445462	+	1434	-	GO:0004180;GO:0004185;GO:0004185;GO:0004185;GO:0006508;GO:0006508;GO:0006508;GO:0008233;GO:0016787;	K16297	EC:3.4.16.-	-	106328067	A0A0D3BM52
Bo4g191030	3.5124463456749502	1.8124761876339499	0.000134355	0.00145354	0.497892749237821	-1.00609308915363	0.00564344	0.035473	C4	51599639	51601413	+	1377	-	GO:0016020;GO:0016021;GO:0016021;GO:0016021;	K06199	-	-	106337342	A0A0D3C5N8
Bo9g007930	32.9888954186574	5.0439085672217301	0.000135085	0.00145973	3.8146610662407	1.93155487887475	0.00554087	0.0349871	C9	1786250	1788159	+	1503	-	GO:0004497;GO:0004497;GO:0005506;GO:0005506;GO:0016020;GO:0016021;GO:0016021;GO:0016491;GO:0016705;GO:0016705;GO:0020037;GO:0020037;GO:0046872;GO:0055114;GO:0055114;GO:0055114;	-	-	-	-	-
Bo2g080600	2.56830770338882	1.36081805898645	0.00013619	0.00147082	0.259109961432542	-1.94836361417031	2.89368e-10	1.45072e-08	C2	22331979	22332899	-	921	-	GO:0000166;GO:0004672;GO:0004672;GO:0004674;GO:0004674;GO:0005524;GO:0005524;GO:0005524;GO:0006468;GO:0006468;	K20604	EC:2.7.12.2	-	106322919	A0A0D3AQC4
Bo2g164160	5.7226149263572097	2.51667453148489	0.000140859	0.00151772	0.056876313554305	-4.13602823025474	1.91433e-10	9.93006e-09	C2	51286969	51288364	-	1047	-	GO:0003677;GO:0003677;	K09422	-	-	106322752	A0A0D3AYD5
Bo7g108340	3.3661111280186802	1.7510828062563899	0.000141165	0.00152057	0.384515277201867	-1.37888717574961	0.0005402	0.00540489	C7	42578771	42579876	-	801	-	-	K22013	EC:4.99.1.10	-	106306852	A0A0D3DFI5
Bo4g194270	2.5300484889745798	1.3391650347744499	0.000141247	0.00152102	0.449656830299451	-1.15310371144183	0.000115511	0.00148152	C4	52286208	52288369	-	1053	-	-	-	-	-	106336832	A0A0D3C614
Bo7g033000	4.8921123114935403	2.2904575251602401	0.000141916	0.00152712	0.259982597745272	-1.9435130369676	2.31319e-05	0.000370666	C7	12824213	12825241	-	948	-	GO:0003677;GO:0003700;GO:0003700;GO:0005634;GO:0005634;GO:0005634;GO:0006355;GO:0006355;GO:0043565;GO:0043565;	K09419	-	-	106301393	A0A0D3D513
Bo8g076320	4.0214769700080897	2.0077254581119401	0.000141936	0.00152712	0.363194133001939	-1.46118719720725	0.00232769	0.0177339	C8	24423804	24425837	-	1197	-	GO:0000166;GO:0004672;GO:0004672;GO:0004674;GO:0004674;GO:0005524;GO:0005524;GO:0005524;GO:0006468;GO:0006468;	-	-	-	106307784	A0A0D3DR73
Bo3g108000	2.4348841014051801	1.28385310277687	0.000142168	0.00152873	0.4589165773638	-1.12369617297356	0.000113072	0.00145372	C3	38522691	38524706	+	1038	-	GO:0016020;GO:0016021;GO:0016021;	-	-	-	106328140	A0A0D3BFW4
Bo5g002410	2.3084809213633499	1.20694380916085	0.000144466	0.00154852	0.234119812012513	-2.09468106952421	1.05634e-13	1.07356e-11	C5	241269	242306	-	1038	-	GO:0005886;GO:0005886;GO:0009793;GO:0009793;GO:0048364;GO:0048364;GO:0048367;GO:0048367;	-	-	-	106295506	A0A0D3C6X2
Bo1g121610	Inf	Inf	0.000150475	0.00160645	4.30645214332407	2.10649979899581	1.04117e-05	0.000188024	C1	36236292	36236853	-	324	-	-	-	-	-	106316088	A0A0D3ACW2
Bo4g165310	2.73082877717582	1.4493388600338799	0.000152987	0.00163046	0.404025301476897	-1.30748245247398	0.000185569	0.00220397	C4	44474852	44475349	-	498	-	-	-	-	-	106339514	A0A0D3C2K1
Bo5g017280	2.3251591025790601	1.2173294382199999	0.000155786	0.00165839	0.357763737021944	-1.48292093184053	1.5952e-07	4.60342e-06	C5	5744167	5747220	-	1368	-	GO:0003824;GO:0003824;GO:0004334;GO:0004334;GO:0008152;GO:0008152;GO:0009072;GO:0009072;	-	-	-	-	-
Bo3g022260	3.87442741428322	1.95398311616454	0.000162505	0.00172448	0.333673689150677	-1.58349016332174	7.18516e-05	0.000992337	C3	7668917	7670662	+	1329	-	GO:0008289;GO:0008289;GO:0016020;GO:0016021;GO:0016021;	-	-	-	106329354	A0A0D3B3J7
Bo4g198710	3.6556477308900601	1.87012705470019	0.000165654	0.0017554	0.404968253562792	-1.30411927879796	0.000586386	0.00577965	C4	53587892	53590612	+	1692	-	GO:0004857;GO:0004857;GO:0005618;GO:0005618;GO:0016787;GO:0030599;GO:0030599;GO:0030599;GO:0042545;GO:0042545;GO:0042545;GO:0043086;GO:0045330;GO:0045330;GO:0045490;GO:0045490;	K01051	EC:3.1.1.11	-	106337119	A0A0D3C6R0
Bo4g127160	16.213945296722098	4.0191632756544102	0.000167827	0.00177641	0.280325508174184	-1.83482506674237	0.00415975	0.0278908	C4	33075574	33076857	+	1284	-	GO:0005515;	-	-	-	106336949	A0A0D3BYR1
Bo4g044210	Inf	Inf	0.000176662	0.0018604	0.0761036457184281	-3.71589062259106	0.000157745	0.00192723	C4	10174384	10175919	-	1536	-	GO:0003676;GO:0003676;GO:0008270;GO:0008270;	-	-	-	106338076	A0A0D3BSK4
Bo1g123460	Inf	Inf	0.000179629	0.0018879	4.67344822457853	2.22448741091679	2.51812e-06	5.4054e-05	C1	36837550	36843552	-	705	-	GO:0005634;GO:0009409;GO:0009506;GO:0010043;	-	-	-	-	-
Bo9g161700	2.3777895586969802	1.24962103801935	0.000185476	0.00194222	0.360070237547713	-1.47364973978252	3.90452e-07	1.02477e-05	C9	47671621	47673087	-	1230	-	GO:0005622;GO:0005622;GO:0006886;GO:0006886;	-	-	-	106317927	A0A0D3EEW9
Bo4g188040	9.4683594898346506	3.2431144826204701	0.00018838	0.00196987	0.406124845967498	-1.30000480350889	0.0125329	0.06552	C4	50471831	50472259	+	429	-	GO:0004672;GO:0004674;GO:0005524;GO:0006468;GO:0016020;GO:0016021;GO:0016301;GO:0016310;GO:0048544;	-	-	-	-	-
Bo6g029260	2.3424483392906699	1.22801723082106	0.000197789	0.00205876	0.499347131644278	-1.00188501081021	0.000566196	0.0056139	C6	6705361	6708179	+	2310	-	GO:0004672;GO:0004672;GO:0005515;GO:0005524;GO:0005524;GO:0006468;GO:0006468;GO:0009637;GO:0009637;GO:0042802;GO:0042802;	-	-	-	106300587	A0A0D3CQC7
Bo6g106970	7.9302717535931002	2.9873703048754798	0.000198337	0.00206355	0.423523119600967	-1.23948736825018	0.0158171	0.0783106	C6	33371724	33373561	-	1377	-	GO:0030246;GO:0030246;GO:0030246;	-	-	-	106301076	A0A0D3CYZ6
Bo6g106990	4.2629591797983304	2.0918552407617401	0.000202284	0.00209466	2.8653992676869	1.51873617960288	1.91274e-05	0.000316509	C6	33383396	33384304	-	909	-	GO:0003677;GO:0003677;GO:0003677;GO:0003700;GO:0003700;GO:0005634;GO:0005634;GO:0006351;GO:0006351;GO:0006355;GO:0006355;GO:0006355;	-	-	-	106300428	A0A0D3CYZ8
Bo5g118640	2.7208152314274701	1.4440389875489299	0.000203719	0.00210776	0.421235085231123	-1.24730248952824	0.000119175	0.00152121	C5	36375859	36378597	-	2139	-	-	-	-	-	-	-
Bo2g127010	6.3696370746921298	2.6712111738225501	0.00020996	0.00216451	2.00323928021201	1.00233475652628	0.0130996	0.0678849	C2	39071258	39073958	-	1626	-	GO:0016020;GO:0016021;GO:0016021;	-	-	-	-	-
Bo7g097710	18.401159618364499	4.2017247808950904	0.000210161	0.00216598	0.289490220718494	-1.78841348159247	0.0062795	0.0384627	C7	38060582	38061223	+	642	-	-	-	-	-	106304081	A0A0D3DDC0
Bo5g099900	2.7290788146797702	1.4484140596563	0.000212451	0.00218716	0.403118522944473	-1.31072401959672	5.41745e-05	0.00078018	C5	32222457	32225439	+	1860	-	GO:0000166;GO:0002752;GO:0002752;GO:0004672;GO:0004672;GO:0004672;GO:0004674;GO:0004674;GO:0004674;GO:0005524;GO:0005524;GO:0005524;GO:0005622;GO:0005622;GO:0005886;GO:0005886;GO:0006468;GO:0006468;GO:0006468;GO:0008061;GO:0008061;GO:0009817;GO:0009817;GO:0010200;GO:0016020;GO:0016021;GO:0016021;GO:0016301;GO:0016301;GO:0016310;GO:0016740;GO:0019199;GO:0019199;GO:0032491;GO:0032491;GO:0032499;GO:…	K13429	-	-	106343547	-
Bo3g175690	Inf	Inf	0.000218142	0.00224079	0.327402034058239	-1.61086480998239	0.0400348	0.15638	C3	61610587	61611201	-	435	-	GO:0016491;GO:0016491;GO:0055114;GO:0055114;	-	-	-	-	-
Bo5g012040	10.035432079429199	3.3270308287209298	0.000221174	0.00227005	2.70443472448377	1.43532707634146	0.000585584	0.00577554	C5	4304443	4305504	-	870	-	-	-	-	-	-	-
Bo3g015440	2.5721223640662099	1.3629592779039199	0.000221494	0.00227271	0.369253024186957	-1.43731835815821	4.03307e-06	8.21551e-05	C3	5206174	5207916	-	927	-	-	K16274	EC:2.3.2.27	-	106331507	A0A0D3B263
Bo6g087190	2.8833117540469302	1.5277268346481001	0.000222983	0.00228484	0.397815063205404	-1.32983019025844	8.35433e-05	0.0011228	C6	27500939	27503062	-	1176	-	GO:0006629;GO:0006629;GO:0008081;GO:0008081;	K01126	EC:3.1.4.46	-	106301127	A0A0D3CWQ6
Bo9g038600	2.2932157138426601	1.1973720699878201	0.000226354	0.00231302	0.390429774639563	-1.35686501614929	1.99626e-06	4.43614e-05	C9	13212885	13215292	-	1659	-	GO:0003677;GO:0003700;GO:0003700;GO:0005634;GO:0005634;GO:0006351;GO:0006351;GO:0006355;GO:0006355;GO:0006355;GO:0043565;GO:0043565;	-	-	-	106313108	A0A0D3E4X0
Bo4g107620	3.03176835170418	1.60015952573367	0.000227515	0.00232297	0.319081047121712	-1.64800517738756	0.000184901	0.00220022	C4	26820024	26822000	-	1977	-	GO:0004672;GO:0004672;GO:0005524;GO:0005524;GO:0006468;GO:0006468;GO:0016020;GO:0016021;GO:0016021;GO:0030246;GO:0030246;GO:0030246;	-	-	-	106337529	A0A0D3BWU4
Bo9g163140	2.4512630397267299	1.2935253049912401	0.000231476	0.00235629	0.462334393825145	-1.11299140383573	0.000201114	0.00235642	C9	47930438	47932234	-	1797	-	GO:0008270;GO:0008270;	-	-	-	106319080	A0A0D3EF14
Bo5g098820	2.2918161616307802	1.19649132274196	0.000232742	0.00236724	0.341181550055321	-1.55138846219182	6.9139e-08	2.16385e-06	C5	32112020	32114102	-	861	-	GO:0003924;GO:0003924;GO:0005525;GO:0005525;	K07976	-	-	106344012	A0A0D3CHH1
Bo3g062710	2.4292966961401099	1.28053870072306	0.000233775	0.0023758	0.466927456459958	-1.09872966986695	0.000242085	0.00276457	C3	24128557	24131889	+	1266	-	GO:0003677;GO:0003677;GO:0003677;GO:0005634;GO:0005634;GO:0006351;GO:0006351;GO:0006355;GO:0006355;GO:0006355;	-	-	-	106328589	A0A0D3BAK8
Bo5g003130	64.470608157737502	6.0105696875259698	0.000238738	0.00241963	0.0991119898748708	-3.33479659465665	0.0036351	0.0251531	C5	601166	603805	+	1584	-	GO:0008152;GO:0008152;GO:0016020;GO:0016021;GO:0016021;GO:0016746;GO:0016746;	K13508	-	-	106294683	A0A0D3C744
Bo8g052960	2.4357912008871199	1.2843904688947501	0.000242088	0.00245091	0.258566770758512	-1.9513912131739	1.71862e-10	9.01734e-09	C8	17625485	17627511	+	1248	-	GO:0016020;GO:0016021;GO:0016021;	K15119	-	-	106307394	A0A0D3DN74
Bo7g064130	2.2507635134411599	1.17041448153274	0.000242543	0.00245485	0.295090889463609	-1.76076871470899	4.3341e-10	2.07815e-08	C7	23997140	24000593	+	2172	-	GO:0005515;GO:0009507;GO:0009507;GO:0009540;GO:0009540;GO:0009688;GO:0009688;GO:0016020;GO:0016020;GO:0055114;GO:0055114;GO:0071949;GO:0071949;	-	-	-	-	-
Bo7g117620	2.7031475035434598	1.4346402380378001	0.000250129	0.00252476	0.43672965713282	-1.19518759091445	0.000191323	0.00225868	C7	47065144	47068751	-	2589	-	GO:0003824;GO:0003824;GO:0004630;GO:0004630;GO:0004630;GO:0004630;GO:0005509;GO:0005509;GO:0005773;GO:0005886;GO:0009409;GO:0009506;GO:0009789;GO:0012501;GO:0016020;GO:0016020;GO:0016020;GO:0016042;GO:0016042;GO:0016787;GO:0046470;GO:0046470;GO:0046473;GO:0070290;GO:0070290;GO:0090333;	K01115	EC:3.1.4.4	-	106306155	A0A0D3DHW4
Bo7g063670	2.4116425181138399	1.27001606993833	0.00026035	0.00261729	0.449523894675456	-1.15353028990724	0.000125661	0.00158828	C7	23639839	23642057	-	1812	-	-	-	-	-	106306692	A0A0D3D850
Bo8g071190	2.2388984668743199	1.1627891040465601	0.000261135	0.00262305	0.459101647778519	-1.12311448479824	6.92078e-05	0.000961148	C8	23566022	23567454	-	1275	-	GO:0016020;GO:0016021;GO:0016021;	-	-	-	106310959	A0A0D3DQV6
Bo3g086680	6.6255292676781599	2.7280357060885598	0.000278025	0.0027651	0.323958735263746	-1.62611803554818	0.00167625	0.0136256	C3	31871069	31871921	-	375	-	-	-	-	-	106336523	A0A0D3BDG9
Bo01868s010	2.4187540903578402	1.2742641010023601	0.000282547	0.00280258	0.416144135525708	-1.26484478865474	2.24455e-05	0.000361981	Scaffold01868	3603	4160	+	558	-	GO:0000166;GO:0004672;GO:0004672;GO:0004674;GO:0004674;GO:0005524;GO:0005524;GO:0005524;GO:0006468;GO:0006468;	-	-	-	-	-
Bo1g028410	2.4302071200546802	1.2810792761117	0.000296019	0.00291833	0.303787277696731	-1.71886664238825	2.21061e-08	7.68371e-07	C1	9749626	9751267	-	1128	-	GO:0003824;GO:0003824;GO:0004805;GO:0004805;GO:0005992;GO:0005992;GO:0005992;GO:0016311;GO:0016787;	K01087	EC:3.1.3.12	-	106322665	A0A0D3A575
Bo7g056170	2.69903779576831	1.4324451796153299	0.000297534	0.00292937	0.376597081632492	-1.40890627478292	1.76452e-05	0.000295801	C7	20434126	20435242	-	648	-	GO:0005829;GO:0005829;GO:0006508;GO:0006508;GO:0016920;GO:0016920;	K01304	EC:3.4.19.3	-	106306252	A0A0D3D746
Bo3g153010	4.1873125645662501	2.0660246129717201	0.00030304	0.00297806	0.140910826146611	-2.8271456370509	7.75622e-08	2.39342e-06	C3	54299400	54300063	+	423	-	-	-	-	-	106335662	A0A0D3BJP7
Bo3g084320	7.3620767974175001	2.8801127992568198	0.000306323	0.00300557	0.348209870003701	-1.52197099814883	0.00461595	0.0303345	C3	31537757	31539507	+	1062	-	GO:0016788;GO:0016788;	-	-	-	106331357	A0A0D3BDD1
Bo9g159770	2.2724597509045199	1.1842547420828899	0.000306554	0.00300705	0.389999134060782	-1.35845717421402	2.29034e-06	4.98885e-05	C9	47088667	47090394	+	1728	-	GO:0016020;GO:0016021;GO:0016021;GO:0016021;GO:0055085;GO:0055085;	K13754	-	-	106313442	A0A0D3EEM5
Bo3g009740	2.3907800525235299	1.25748141079842	0.000313698	0.00306661	0.277852417025201	-1.84760930460758	1.11936e-09	4.91361e-08	C3	3355935	3357866	-	1932	-	GO:0005515;	-	-	-	106336022	A0A0D3B141
Bo1g002410	3.79986727904677	1.92594902929177	0.000317467	0.0030962	0.477276538894208	-1.06710267417474	0.0291281	0.12428	C1	192637	194204	-	1263	-	-	-	-	-	106324198	A0A0D3A0W4
Bo1g050840	2.4031205204696402	1.26490900382515	0.00031793	0.00309821	0.445115701054251	-1.16774770343533	0.000104647	0.00136226	C1	14335275	14336098	+	444	-	GO:0046872;GO:0046872;	-	-	-	-	-
Bo1g017300	4.6477530412967996	2.2165334130707799	0.000328995	0.003196	0.308821046422929	-1.69515701800898	0.00133348	0.011296	C1	5939308	5943351	-	1743	-	GO:0003824;GO:0003824;GO:0006520;GO:0006520;GO:0016829;GO:0016831;GO:0016831;GO:0019752;GO:0019752;GO:0030170;GO:0030170;	-	-	-	-	-
Bo13142s010	Inf	Inf	0.000333191	0.00323086	2.646784889967	1.40424094859665	0.00862477	0.0489999	Scaffold13142	123	314	+	192	-	-	-	-	-	-	-
Bo5g017130	2.3055986089378702	1.2051413701885201	0.000333714	0.00323425	0.40480459238799	-1.30470243781513	5.59776e-06	0.000109096	C5	5636100	5639891	-	1989	-	GO:0004553;GO:0004553;GO:0004564;GO:0004564;GO:0004564;GO:0004575;GO:0004575;GO:0004575;GO:0005975;GO:0005975;GO:0008152;GO:0016020;GO:0016021;GO:0016021;GO:0016787;GO:0016798;	K01193	EC:3.2.1.26	-	106295578	A0A0D3C9P9
Bo4g197460	3.1821328742124799	1.66999407858696	0.000338169	0.00327145	82.4250387288878	6.36501075465941	1.25126e-14	1.58634e-12	C4	53432058	53433947	-	1791	-	GO:0004857;GO:0004857;GO:0005576;GO:0005576;GO:0005618;GO:0005618;GO:0005618;GO:0016787;GO:0030599;GO:0030599;GO:0030599;GO:0042545;GO:0042545;GO:0042545;GO:0043086;GO:0045330;GO:0045330;GO:0045490;GO:0045490;GO:0071555;	-	-	-	106341487	A0A0D3C6N4
Bo3g151380	8.8546640573008002	3.1464375726959899	0.000348814	0.00336481	0.436855843518026	-1.19477080635634	0.0151901	0.0760043	C3	53873199	53875396	+	1344	-	GO:0003824;GO:0003824;GO:0008483;GO:0008483;GO:0030170;GO:0030170;	-	-	-	-	-
Bo1g051140	7.37415676065645	2.8824780857316799	0.000355772	0.00342838	0.219307516582801	-2.18897283485537	0.00233324	0.0177689	C1	14495631	14497069	+	1086	-	GO:0016020;GO:0016020;GO:0016020;GO:0016021;GO:0016021;GO:0016021;GO:0022857;GO:0022857;GO:0055085;	-	-	-	106308516	A0A0D3A764
Bo7g107300	2.87700234334394	1.52456639616559	0.000362561	0.00348658	2.34507480381695	1.229633942943	0.000157966	0.00192881	C7	41923508	41923862	+	207	-	GO:0016020;GO:0016021;GO:0016021;	-	-	-	106306721	A0A0D3DF82
Bo9g135680	2.21093743918092	1.1446582031458301	0.000368336	0.00353755	0.440236071288218	-1.18365073580828	3.04972e-05	0.000473866	C9	41790860	41794352	-	2403	-	GO:0004222;GO:0004222;GO:0005524;GO:0005524;GO:0006508;GO:0006508;GO:0008270;GO:0008270;GO:0009507;GO:0009941;GO:0009941;GO:0016020;GO:0016020;GO:0016021;GO:0016021;	K03798	EC:3.4.24.-	-	106318241	A0A0D3ECJ9
Bo9g008010	4.3556530247066698	2.1228890322291099	0.000370049	0.00354952	8.70758268494059	3.12227226733395	0.0256786	0.112986	C9	1825059	1825623	+	417	-	GO:0009507;GO:0009507;	-	-	-	106313182	A0A0D3E0E6
Bo1g007090	2.4929802442295101	1.3178714501519	0.000372846	0.00357072	0.478564776364717	-1.06321388028013	0.000598264	0.00586656	C1	2308601	2311155	+	1110	-	GO:0005515;	-	-	-	106308577	A0A0D3A1Y3
Bo00927s010	5.06336455086978	2.3400963587882	0.000382385	0.00365456	0.219253554278037	-2.18932786477044	8.65236e-07	2.10265e-05	Scaffold00927	7287	9172	+	1113	-	GO:0009058;GO:0009058;GO:0016844;GO:0016844;	-	-	-	106320455	A0A0D2ZSA7
Bo5g039590	2.34799485552979	1.23142924749831	0.000400971	0.00380095	0.367496456258521	-1.44419775667416	1.45054e-06	3.33026e-05	C5	12971327	12972470	+	543	-	-	-	-	-	-	-
Bo3g013510	3.5166273403450301	1.8141924595802501	0.000412152	0.00390098	2.39498051934671	1.26001392119895	0.000285503	0.00316473	C3	4732844	4734019	+	1176	-	GO:0004190;GO:0004190;GO:0006508;GO:0006508;	-	-	-	106335704	A0A0D3B1W9
Bo9g160360	4.8160441922942399	2.26784863040975	0.000419169	0.00395934	2.22849529256745	1.15606991343126	0.0307674	0.128973	C9	47444845	47445399	-	555	-	-	-	-	-	106313770	A0A0D3EET4
Bo5g155050	2.1705710462541199	1.11807464507456	0.000419471	0.00396119	0.468020339089497	-1.09535686750186	8.7636e-05	0.00116733	C5	46660812	46661980	+	729	-	GO:0003677;GO:0003677;	-	-	-	-	-
Bo2g083760	35.482389064030698	5.1490312458677199	0.000421051	0.0039751	0.19896781715837	-2.32939299970046	0.00567872	0.0356409	C2	23367694	23368191	+	498	-	GO:0003700;GO:0003700;GO:0006355;GO:0006355;	-	-	-	106325023	A0A0D3AQP2
Bo8g071470	Inf	Inf	0.000433726	0.00407924	0.319210854965418	-1.64741838274282	0.0472723	0.176305	C8	23783725	23785797	+	1170	-	GO:0005829;GO:0005829;GO:0008270;GO:0008270;GO:0016491;GO:0016491;GO:0046872;GO:0055114;GO:0055114;	K00121	-	-	106309583	A0A0D3DQY4
Bo7g089330	2.79593408898304	1.4833303511932801	0.000447665	0.00420184	0.48509641941847	-1.0436565640998	0.0071374	0.0423444	C7	34562622	34563407	-	786	-	GO:0080167;GO:0080167;	-	-	-	106301755	A0A0D3DBS9
Bo5g143380	2.6737164967664402	1.41884649968981	0.000455537	0.0042639	2.18445618216221	1.12727416716401	0.0128068	0.0666631	C5	44369111	44371789	+	1491	-	GO:0004335;GO:0004335;GO:0005524;GO:0005524;GO:0005534;GO:0005534;GO:0005737;GO:0005737;GO:0006012;GO:0006012;GO:0008152;GO:0008152;GO:0016301;GO:0016301;GO:0016773;GO:0016773;GO:0046835;GO:0046835;	K18674	EC:2.7.1.157	-	106296154	A0A0D3CMA5
Bo8g082800	2.1197479921820901	1.08389275910924	0.000472775	0.0043998	0.345119295403327	-1.53483295868423	3.45084e-08	1.15336e-06	C8	28640543	28642126	-	864	-	GO:0015267;GO:0015267;GO:0016020;GO:0016020;GO:0016020;GO:0016021;GO:0016021;GO:0055085;GO:0055085;	K09872	-	-	106312266	A0A0D3DSS2
Bo1g003170	3.2588747078303202	1.70437388663721	0.000478196	0.00444358	0.294336629580554	-1.76446100104319	4.16988e-05	0.000625315	C1	568201	568758	+	402	-	-	-	-	-	106341926	A0A0D3A140
Bo8g010920	50.524562197624597	5.6589130103928698	0.000500088	0.00462622	0.295865979198026	-1.75698428028884	0.0259498	0.113858	C8	1888203	1888556	+	354	-	-	-	-	-	106307561	A0A0D3DJE1
Bo2g144900	2.48800335733551	1.3149884322563099	0.000521202	0.00479413	0.446870372282311	-1.16207169834938	0.000257097	0.00290496	C2	45593339	45594221	+	801	-	GO:0009507;GO:0009522;GO:0009522;GO:0009523;GO:0009523;GO:0009535;GO:0009535;GO:0009536;GO:0009579;GO:0009765;GO:0009765;GO:0015979;GO:0016020;GO:0016020;GO:0016020;GO:0016021;GO:0016021;GO:0016168;GO:0016168;GO:0018298;GO:0018298;	K08913	-	-	106326940	A0A0D3AW97
Bo2g012590	2.5976909498509899	1.37722980197947	0.000528893	0.00485767	0.481334634798706	-1.05488785763367	0.00118535	0.0102811	C2	3681047	3682489	-	1443	-	GO:0003979;GO:0003979;GO:0003979;GO:0016491;GO:0016616;GO:0016616;GO:0051287;GO:0051287;GO:0055114;GO:0055114;GO:0055114;	K00012	EC:1.1.1.22	-	106319126	A0A0D3AJ76
Bo9g089650	2.1962162620675798	1.13502012394719	0.000534051	0.00489837	0.423617518844818	-1.23916584118525	1.60301e-05	0.000272265	C9	27555539	27560697	-	2298	-	GO:0016020;GO:0016021;GO:0016021;GO:0055085;GO:0055085;	-	-	-	106312972	A0A0D3E912
Bo1g007480	2.14045772616213	1.0979193427254399	0.000537405	0.00492491	0.205441218538609	-2.28320243019615	8.95662e-16	1.47567e-13	C1	2524980	2528061	-	1791	-	GO:0004029;GO:0004029;GO:0008152;GO:0008152;GO:0009414;GO:0009414;GO:0009507;GO:0009737;GO:0009737;GO:0009941;GO:0009941;GO:0016491;GO:0016491;GO:0016620;GO:0016620;GO:0033721;GO:0033721;GO:0055114;GO:0055114;	K00128	EC:1.2.1.3	-	106315472	-
Bo8g100260	2.6005440823286898	1.3788134935457099	0.000546374	0.00500315	0.40966444864178	-1.28748539609805	5.38448e-06	0.000105515	C8	34725249	34726966	+	1011	-	GO:0005739;GO:0016020;GO:0016021;GO:0016021;GO:0051560;	K20858	-	-	106312319	A0A0D3DVS5
Bo1g014310	14.937953915756101	3.9009106474492401	0.000554335	0.00505764	0.303605012052995	-1.71973248725548	0.0118669	0.0628553	C1	4582105	4583151	+	849	-	GO:0004553;GO:0004553;GO:0005576;GO:0005618;GO:0005618;GO:0005618;GO:0005975;GO:0005975;GO:0006073;GO:0006073;GO:0008152;GO:0010411;GO:0010411;GO:0016740;GO:0016762;GO:0016762;GO:0016762;GO:0016787;GO:0016798;GO:0042546;GO:0042546;GO:0048046;GO:0048046;GO:0048046;GO:0071555;GO:0071555;	K08235	EC:2.4.1.207	-	106314299	A0A0D3A358
Bo3g047080	2.8300867283642299	1.5008462653058401	0.000579076	0.00526848	2.22460914642161	1.15355188347134	0.000409421	0.00426647	C3	19530119	19531222	-	957	-	GO:0005515;	-	-	-	106336367	A0A0D3B8D7
Bo2g018320	3.8494827837123999	1.94466461840503	0.000579111	0.00526848	2.14004928637953	1.09764402297994	0.00215438	0.0166682	C2	5347135	5350045	+	2031	-	-	K01301	EC:3.4.17.21	-	106326952	-
Bo6g016870	Inf	Inf	0.000580416	0.0052762	2.24932534371974	1.16949234845424	0.0354949	0.143437	C6	3363766	3364430	+	366	-	GO:0016020;GO:0016021;GO:0016021;	-	-	-	-	-
Bo1g112320	4.4718675373892802	2.1608774542853202	0.000590181	0.0053532	2.92774722609215	1.54979100054633	2.91168e-05	0.000454495	C1	34237232	34240061	+	1824	-	GO:0005515;	-	-	-	-	-
Bo5g063230	5.4946654707490996	2.4580316488937601	0.000600526	0.00543908	0.432225293442209	-1.21014459498074	0.0134224	0.0691458	C5	20261341	20264957	-	1971	-	GO:0016788;GO:0016788;	-	-	-	-	-
Bo4g190790	2.1236604396860401	1.08655310646998	0.000609302	0.00550517	0.32341949422903	-1.62852145448045	6.41005e-09	2.47917e-07	C4	51419216	51420992	-	891	-	GO:0008152;GO:0008152;GO:0016787;GO:0016787;	-	-	-	106337394	A0A0D3C5L4
Bo6g035910	Inf	Inf	0.000610586	0.00551543	0.190668741968544	-2.39085974574769	0.00937701	0.0522965	C6	8928445	8930051	+	1062	-	GO:0003677;GO:0003677;GO:0005634;GO:0005634;GO:0006351;GO:0006351;GO:0006355;GO:0006355;	-	-	-	106298965	A0A0D3CR46
Bo3g038870	6.22540647560528	2.6381680381759001	0.000621557	0.00560229	3.43384070275262	1.77982311369083	0.00579152	0.0361065	C3	15394403	15395784	+	717	-	GO:0003700;GO:0003700;GO:0005634;GO:0005634;GO:0006355;GO:0006355;	-	-	-	-	-
Bo3g138360	5.8724850719380299	2.553971140861	0.000629501	0.0056643	0.267405900491592	-1.90289679506552	0.000357467	0.00379593	C3	50170061	50170477	-	417	-	-	-	-	-	106331822	A0A0D3BI23
Bo5g004220	2.3125226128718199	1.20946747300994	0.000639963	0.00575148	0.47154155095061	-1.08454319204807	0.000339148	0.00363442	C5	1112835	1114501	-	636	-	GO:0005622;GO:0007034;GO:0007034;	K12192	-	-	106293004	A0A0D3C7F3
Bo8g097620	2.5879614399398498	1.3718161216495901	0.000666269	0.00595625	0.438208840062035	-1.19030950653134	0.000350532	0.00373501	C8	33307437	33309586	+	1272	-	GO:0005622;GO:0007034;GO:0007034;	K15053	-	-	106312770	A0A0D3DV11
Bo2g061330	29.749319015066099	4.8947847392800004	0.000667353	0.00596308	0.122240231029763	-3.03220891975529	0.00108481	0.00957561	C2	18038920	18040924	-	1008	-	GO:0004601;GO:0004601;GO:0004601;GO:0005576;GO:0005576;GO:0006979;GO:0006979;GO:0006979;GO:0016491;GO:0020037;GO:0020037;GO:0020037;GO:0042744;GO:0042744;GO:0042744;GO:0046872;GO:0046872;GO:0055114;GO:0055114;GO:0055114;GO:0098869;	K00430	EC:1.11.1.7	-	106325806	A0A0D3AP32
Bo1g114740	3.3405294694305798	1.7400767860475299	0.000671859	0.00599902	0.123760705608861	-3.01437476758779	9.9131e-12	6.58526e-10	C1	34588614	34590481	-	1350	-	GO:0006508;GO:0006508;GO:0006508;GO:0008233;GO:0008234;GO:0008234;GO:0008234;GO:0016787;	-	-	-	106293355	A0A0D3ACC0
Bo3g062700	2.2738271185897299	1.18512256881474	0.000674581	0.00602044	0.380576271038235	-1.3937424826256	3.28952e-06	6.86541e-05	C3	24125046	24127872	+	1287	-	GO:0003677;GO:0003677;GO:0003677;GO:0005634;GO:0005634;GO:0006351;GO:0006351;GO:0006355;GO:0006355;GO:0006355;	-	-	-	106329064	A0A0D3BAK7
Bo7g104170	2.2392913859435799	1.16304226990723	0.000683119	0.00609079	0.405120928718677	-1.30357547770127	1.12646e-05	0.000201964	C7	40023174	40026641	-	1950	-	GO:0006629;GO:0006629;GO:0016042;GO:0016042;GO:0016787;GO:0016787;	-	-	-	106301282	A0A0D3DEB9
Bo6g065250	6.3401097065262704	2.6645078043539701	0.000692919	0.00616782	2.17778457373972	1.12286124984511	0.00730401	0.0430596	C6	17640280	17650124	-	3729	-	GO:0005515;GO:0007165;GO:0007165;GO:0043531;GO:0043531;	-	-	-	-	-
Bo9g154810	2.2341087805691	1.15969943352348	0.000702202	0.00624149	0.489951939520295	-1.02928785589689	0.000491711	0.00498557	C9	46417138	46418466	-	1329	-	GO:0016020;GO:0016021;GO:0016021;GO:0016021;	-	-	-	106319429	A0A0D3EEC5
Bo1g041900	2.77832192994184	1.4742137770807699	0.000716206	0.00635232	0.430378821283048	-1.21632100951534	0.00057113	0.00565684	C1	13012128	13014501	+	1821	-	GO:0005515;	-	-	-	-	-
Bo6g081770	2.2077664043864198	1.14258753395422	0.000759262	0.00670861	0.315790413937909	-1.66296071714755	2.40032e-08	8.27391e-07	C6	25497293	25498160	-	792	-	-	-	-	-	106298417	A0A0D3CW11
Bo9g140960	2.2247640528552899	1.1536523393035401	0.000786026	0.00691718	0.409642416703682	-1.28756298697196	1.55667e-05	0.000265357	C9	42869561	42871999	-	1071	-	GO:0016020;GO:0016021;GO:0016021;	-	-	-	106318720	A0A0D3ECY1
Bo9g004510	2.3920136270457699	1.25822560843876	0.000790954	0.00695396	0.475163490058483	-1.07350410625524	0.000643831	0.00623332	C9	925617	928355	-	642	-	GO:0005886;GO:0005886;GO:0008270;GO:0008270;GO:0016020;GO:0016021;GO:0016021;GO:0046872;	-	-	-	106316035	A0A0D3DZZ4
Bo3g064190	4.4228630860886797	2.1449805829378699	0.000805872	0.00706531	0.0412315212935698	-4.60010849735304	1.55522e-10	8.23669e-09	C3	24477408	24480416	+	1152	-	GO:0008168;GO:0008168;GO:0032259;	K21484	-	-	106329214	A0A0D3BAQ7
Bo9g161390	3.7006057267904802	1.8877614349343499	0.000808521	0.00708165	0.358115178587087	-1.48150442680631	0.000388526	0.00407255	C9	47465041	47468720	-	1509	-	GO:0003824;GO:0003824;GO:0004351;GO:0004351;GO:0004351;GO:0006536;GO:0006536;GO:0016829;GO:0016831;GO:0016831;GO:0016831;GO:0019752;GO:0019752;GO:0030170;GO:0030170;	K01580	EC:4.1.1.15	-	106313481	A0A0D3EET8
Bo3g019310	2.2019068252520002	1.13875342185827	0.000820969	0.00718222	0.377867755991881	-1.4040466783146	2.01578e-06	4.46625e-05	C3	6577262	6579190	-	1929	-	-	-	-	-	106335463	A0A0D3B301
Bo7g058150	3.6890006851151198	1.8832300569677001	0.000821679	0.00718675	0.349033055954066	-1.51856441833022	0.000511411	0.00515331	C7	21400064	21401150	+	1005	-	GO:0008152;GO:0008152;GO:0016740;GO:0016757;GO:0016758;GO:0016758;	-	-	-	-	-
Bo1g141510	2.8578916602951701	1.5149512263996301	0.000821947	0.0071874	0.405722014269348	-1.30143651032305	4.88618e-05	0.000714399	C1	40576053	40579582	+	2028	-	GO:0046373;GO:0046373;GO:0046556;GO:0046556;	K01209	EC:3.2.1.55	-	106342741	A0A0D3AEL6
Bo7g077190	2.10065105067555	1.0708365288500901	0.000854294	0.00744228	0.475329783632198	-1.07299929275846	0.000158245	0.00192991	C7	28899218	28904339	-	2664	-	GO:0000166;GO:0004176;GO:0004176;GO:0004176;GO:0004252;GO:0004252;GO:0004252;GO:0005524;GO:0005524;GO:0005524;GO:0005777;GO:0005777;GO:0005782;GO:0005782;GO:0006508;GO:0006508;GO:0006508;GO:0006515;GO:0006515;GO:0006515;GO:0008233;GO:0008236;GO:0016485;GO:0016485;GO:0016558;GO:0016560;GO:0016560;GO:0016787;GO:0016887;GO:0030163;GO:0030163;GO:0040007;GO:0040007;GO:0043233;GO:0048527;GO:0048527;	K01338	EC:3.4.21.53	-	106306157	A0A0D3D9R0
Bo2g107540	3.4909460570327302	1.8036180641800801	0.00086397	0.00751426	0.274694101821537	-1.86410216140906	0.000164135	0.00198855	C2	31931570	31935781	+	3042	-	GO:0016020;GO:0016021;GO:0016021;GO:0016787;GO:0016787;	-	-	-	106327557	A0A0D3ASY5
Bo2g164070	7.7894064290481104	2.9615133957458002	0.000868747	0.00753995	3.57768604060001	1.83902678941805	7.18069e-06	0.000135021	C2	51240777	51245795	+	1218	-	GO:0004857;GO:0004857;GO:0043086;	-	-	-	-	-
Bo6g008190	Inf	Inf	0.000876142	0.00759173	0.282189875104946	-1.82526186952459	0.0381069	0.150755	C6	1562070	1562592	+	447	-	GO:0051287;GO:0051287;GO:0055114;GO:0055114;	K15919	-	-	106297166	A0A0D3CNV4
Bo2g052760	2.2195403266079201	1.1502609210841599	0.000879326	0.00761578	0.41078693846533	-1.28353778497145	1.80052e-05	0.000300891	C2	15165421	15167476	-	1071	-	GO:0000166;GO:0003824;GO:0003824;GO:0004356;GO:0004356;GO:0004356;GO:0004356;GO:0005507;GO:0005507;GO:0005524;GO:0005524;GO:0005773;GO:0005773;GO:0005829;GO:0006542;GO:0006542;GO:0006807;GO:0006807;GO:0009570;GO:0009570;GO:0009651;GO:0009651;GO:0009941;GO:0009941;GO:0016874;GO:0022626;GO:0022626;GO:0048046;GO:0048046;	K01915	EC:6.3.1.2	-	106327883	A0A0D3ANB9
Bo7g074100	3.25445966866944	1.7024180355446401	0.000896404	0.00774746	0.410536437944239	-1.28441781805246	0.00349314	0.0243783	C7	27879065	27881310	-	1431	-	GO:0003824;GO:0003824;GO:0004587;GO:0004587;GO:0008483;GO:0008483;GO:0030170;GO:0030170;	K00819	EC:2.6.1.13	-	106301233	A0A0D3D9E9
Bo4g041150	2.57608036819857	1.36517760315473	0.000904154	0.00780357	0.473542004158948	-1.07843569347228	0.00132239	0.0112173	C4	9284518	9286278	-	1470	-	-	-	-	-	106342530	A0A0D3BS96
Bo9g176240	26.1675398092809	4.7097063879476604	0.000904467	0.00780447	3.79816093085183	1.92530103482472	8.29613e-05	0.00111771	C9	52402594	52404151	-	783	-	-	K14842	-	-	106315803	A0A0D3EHC9
Bo8g081980	3.5370584314146698	1.82255005223529	0.000917887	0.00789828	0.487029752203516	-1.03791818696297	0.0113536	0.0607733	C8	28033327	28033956	-	630	-	GO:0016020;GO:0016021;GO:0016021;	-	-	-	106309880	A0A0D3DSJ0
Bo5g043580	46.2914300621987	5.5326732267929097	0.000929289	0.00798532	3.2533606571994	1.70193076382127	0.000847343	0.00780173	C5	14716482	14719171	+	615	-	-	-	-	-	-	-
Bo7g067590	7.4059870580786198	2.88869202841015	0.000942197	0.00808691	2.03915817654918	1.0279736888769	0.0181392	0.087112	C7	26572014	26573520	-	861	-	GO:0004751;GO:0004751;GO:0009052;GO:0009052;GO:0009507;GO:0009507;	K01807	EC:5.3.1.6	-	106303662	A0A0D3D8Z3
Bo9g169710	2.5772650143846398	1.3658408939226001	0.000959551	0.00822257	4.64069980224318	2.21434237541745	7.43485e-06	0.000138962	C9	50069830	50072650	+	2097	-	GO:0004672;GO:0004672;GO:0005524;GO:0005524;GO:0006468;GO:0006468;	-	-	-	-	-
Bo2g024220	2.8704785401144299	1.5212912699668899	0.000983912	0.00840617	0.47827468063739	-1.06408867631192	0.00301051	0.021665	C2	6614008	6616054	+	939	-	GO:0003676;GO:0003676;GO:0003723;GO:0003723;	-	-	-	106322853	A0A0D3AKJ6
Bo4g056340	4.12125649762653	2.0430842564692	0.0010234	0.00870757	2.07360187956016	1.05213893102754	0.00497594	0.0321139	C4	12843792	12844542	+	366	-	-	-	-	-	-	-
Bo5g008260	9.79189381706448	3.2915879135835602	0.00104331	0.00885067	0.148397592494845	-2.75246040807637	0.000109625	0.00141819	C5	2753927	2756011	-	2085	-	GO:0006351;GO:0006351;GO:0006355;GO:0006355;	-	-	-	106292642	A0A0D3C8A8
Bo2g068220	7.6815911429407899	2.9414051776480501	0.00108233	0.00914419	0.346851679426964	-1.52760922487913	0.0134468	0.0692428	C2	19903966	19905366	-	1401	-	GO:0016747;GO:0016747;	-	-	-	106322989	A0A0D3APM6
Bo00613s090	5.8841225619517399	2.5568272971839199	0.00108648	0.0091688	2.39089587168279	1.25755129915112	0.0026006	0.0193365	Scaffold00613	94256	99223	-	2490	-	-	-	-	-	-	-
Bo4g071820	2.1683979797998698	1.11662956794201	0.00111656	0.00937164	0.494314424641767	-1.01649908835807	0.000597609	0.00586168	C4	15391400	15392281	-	882	-	GO:0003676;GO:0003676;	-	-	-	106339426	A0A0D3BU87
Bo7g116820	5.1964058489411897	2.37751411234647	0.00112537	0.00943491	0.300593412089866	-1.73411470389466	0.000914972	0.00830985	C7	46664181	46665704	+	1137	-	GO:0016020;GO:0016021;GO:0016021;	-	-	-	106304074	A0A0D3DHN4
Bo3g047000	15.1879019881621	3.9248506888668899	0.00113395	0.00948556	2.55990191880617	1.35608853523985	0.00623498	0.0382527	C3	19492900	19494003	+	1104	-	GO:0005515;	-	-	-	106329509	A0A0D3B8C9
Bo8g094600	3.9646430227834601	1.98719097123945	0.00115859	0.00966123	2.83604952404805	1.5038827256221	6.37722e-05	0.000894965	C8	32160909	32175354	-	5067	-	GO:0004650;GO:0004650;GO:0004672;GO:0004672;GO:0005515;GO:0005524;GO:0005524;GO:0005576;GO:0005576;GO:0005975;GO:0005975;GO:0006468;GO:0006468;GO:0008152;GO:0016787;GO:0016798;GO:0055114;GO:0055114;GO:0071555;GO:0071555;	-	-	-	-	-
Bo8g097390	2.0369114799965402	1.0263832850927399	0.00116041	0.00967205	0.144974410318611	-2.78612982474705	3.26407e-22	2.00125e-19	C8	33147677	33148759	-	690	-	GO:0003677;GO:0003677;GO:0003677;GO:0003700;GO:0003700;GO:0005634;GO:0005634;GO:0006355;GO:0006355;GO:0043565;GO:0043565;	K09338	-	-	106309545	A0A0D3DUY8
Bo8g101440	2.0471477429466902	1.0336152256270099	0.00118926	0.00988595	0.34725166569639	-1.52594648034618	5.41411e-08	1.7366e-06	C8	35615290	35616199	+	672	-	GO:0009535;GO:0009535;GO:0009611;GO:0009611;GO:0016020;GO:0016021;GO:0016021;GO:0071486;GO:0071486;GO:0071492;GO:0071492;	-	-	-	106307668	A0A0D3DW43
Bo4g173470	2.9503172321640099	1.5608700882587301	0.00119238	0.00990973	3.85421207710652	1.94643595777062	1.21863e-05	0.000216105	C4	46113983	46114909	-	927	-	GO:0000413;GO:0000413;GO:0003755;GO:0003755;GO:0003755;GO:0016853;	-	-	-	-	-
Bo9g142390	25.154893886245802	4.6527671986387897	0.00120978	0.0100386	3.10310303204845	1.63371159933444	0.0012738	0.0108767	C9	43242787	43244901	+	2115	-	GO:0004672;GO:0004672;GO:0005524;GO:0005524;GO:0006468;GO:0006468;GO:0016020;GO:0016021;GO:0016021;GO:0030246;GO:0030246;GO:0030246;	-	-	-	106318599	A0A0D3ED25
Bo3g018930	2.2450078578377801	1.16672049460729	0.00126728	0.0104505	0.495753029263379	-1.01230650692159	0.000876485	0.00802461	C3	6393215	6393859	+	564	-	GO:0005215;GO:0005215;	K03098	-	-	106329091	A0A0D3B2W3
Bo6g010530	Inf	Inf	0.00128892	0.0106101	3.78765184821253	1.92130372786528	0.000322659	0.00349073	C6	2027563	2028620	+	153	-	-	-	-	-	-	-
Bo9g163710	2.1104935228479702	1.0775804016389099	0.00128993	0.0106161	0.369655273586441	-1.43574759958665	9.58797e-07	2.30013e-05	C9	48265635	48268316	+	2277	-	GO:0052861;GO:0052861;	K01180	EC:3.2.1.6	-	106318639	A0A0D3EF71
Bo8g090570	2.1273634872485401	1.0890665572515801	0.00129878	0.0106677	0.467041529564913	-1.09837725408849	0.000186064	0.00220704	C8	30430371	30432165	+	972	-	GO:0000166;GO:0000166;GO:0003676;GO:0003676;GO:0004518;GO:0004518;GO:0004518;GO:0004812;GO:0004812;GO:0005524;GO:0005524;GO:0006418;GO:0006418;GO:0090305;	-	-	-	106307622	A0A0D3DTK4
Bo6g058740	2.5741389576998901	1.3640899355218701	0.00131078	0.010745	0.410128473725864	-1.2858521866841	0.000183936	0.0021933	C6	15801613	15802102	+	405	-	-	-	-	-	106298576	A0A0D3CSU6
Bo5g152710	2.0836367139888199	1.0591037629264199	0.00131302	0.0107586	0.455112230390686	-1.13570573801017	8.4232e-05	0.00112994	C5	46451448	46453719	-	1419	-	-	-	-	-	106293464	A0A0D3CN94
Bo3g138590	2.0285238917141299	1.0204302945355599	0.00132569	0.0108552	0.391117645971445	-1.35432546758357	1.67261e-06	3.78207e-05	C3	50345966	50347837	-	687	-	GO:0016020;GO:0016021;GO:0016021;	-	-	-	106331463	A0A0D3BI46
Bo1g057630	2.0971606505994602	1.06843738167566	0.00133365	0.010906	0.493439514993511	-1.01905484256004	0.000496161	0.00502611	C1	17560599	17564080	-	1407	-	GO:0016020;GO:0016021;GO:0016021;	-	-	-	106322653	A0A0D3A866
Bo4g045400	4.0190632889174296	2.0068592959556	0.00133622	0.0109206	0.375336152287148	-1.41374483793334	0.00191023	0.0151137	C4	10349044	10353431	+	2673	-	GO:0016020;GO:0016021;GO:0016021;GO:0016788;GO:0016788;	-	-	-	-	-
Bo4g146000	2.5609162101008902	1.35666005057323	0.0013437	0.0109689	3.24856075563491	1.69980068718634	0.00393455	0.0267209	C4	39966514	39969279	-	1650	-	GO:0009908;GO:0009908;	-	-	-	106337208	A0A0D3C106
Bo7g081400	5.1995205043389001	2.3783785851944099	0.0013591	0.0110878	0.320307403021269	-1.64247095247677	0.00167252	0.0136101	C7	31497645	31498595	+	951	-	GO:0008152;GO:0008152;GO:0016787;GO:0016787;	-	-	-	-	-
Bo4g008200	3.0499113765260502	1.60876732185455	0.00136463	0.0111178	2.44614011221818	1.29050704221897	0.0141537	0.0719713	C4	978672	979061	-	390	-	-	-	-	-	106337477	A0A0D3BNT0
Bo6g079850	2.0751155201863898	1.05319165248896	0.00137686	0.0112051	0.461427991367926	-1.11582257074769	9.9276e-05	0.00130004	C6	24055812	24056990	-	1020	-	GO:0008152;GO:0008152;GO:0008168;GO:0008168;GO:0008168;GO:0009507;GO:0009536;GO:0009941;GO:0009941;GO:0010189;GO:0010189;GO:0010236;GO:0010236;GO:0016020;GO:0016021;GO:0016021;GO:0016740;GO:0032259;GO:0032259;GO:0032259;GO:0051741;GO:0051741;	K12502	EC:2.1.1.295	-	106300824	A0A0D3CVG9
Bo8g112230	2.0488122962586299	1.03478781662773	0.00139543	0.0113439	0.323903935872651	-1.62636209594396	1.33306e-08	4.83572e-07	C8	39710053	39713561	-	1881	-	GO:0004040;GO:0004040;GO:0004040;GO:0005634;GO:0005654;GO:0005654;GO:0005737;GO:0005829;GO:0005829;GO:0009684;GO:0009684;GO:0009851;GO:0016810;GO:0043864;GO:0043864;GO:0046982;GO:0046982;	-	-	-	-	-
Bo3g097620	2.0146282219513898	1.0105136294063599	0.00142035	0.0115238	0.309999697038548	-1.6896612893272	1.90779e-09	8.08054e-08	C3	34937406	34937867	-	342	-	GO:0005576;GO:0005576;GO:0008083;GO:0008083;GO:0008283;GO:0008283;GO:0010469;GO:0016020;GO:0016021;GO:0016021;	-	-	-	-	-
Bo9g182000	3.08407495019281	1.6248378265232299	0.00144526	0.0116902	0.362698505576935	-1.46315729388903	0.000481978	0.00491171	C9	53915892	53916922	+	780	-	GO:0030001;GO:0030001;GO:0046872;GO:0046872;	-	-	-	-	-
Bo3g044370	2.0186418470526202	1.01338496648117	0.00146237	0.0118132	0.289204039150645	-1.78984039314497	2.59562e-10	1.31348e-08	C3	18311789	18313063	-	1089	-	GO:0016491;GO:0016491;GO:0055114;	-	-	-	106336524	A0A0D3B7W5
Bo2g093370	3.9059378517338699	1.96566899435818	0.00151071	0.0121642	0.489040628897658	-1.03197376739029	0.0169116	0.0825785	C2	25836397	25837266	-	870	-	-	-	-	-	106327297	A0A0D3ARF9
Bo9g054500	2.04788761815231	1.03413654679155	0.00151988	0.0122274	0.329060453088204	-1.60357544296723	2.50637e-08	8.58409e-07	C9	16103647	16106268	-	2196	-	GO:0005515;GO:0008270;GO:0008270;	-	-	-	-	-
Bo4g108210	2.5868770206388101	1.37121147036137	0.00152472	0.0122557	0.287646074197383	-1.79763331447789	7.75283e-07	1.9051e-05	C4	27414586	27419007	+	1413	-	GO:0006099;GO:0006099;GO:0016740;GO:0046912;GO:0046912;	K01647	EC:2.3.3.1	-	106339817	A0A0D3BX03
Bo5g140050	5.30618990017821	2.40767630827352	0.00153763	0.0123169	0.327348729890632	-1.61109971359051	0.00192291	0.015198	C5	43640711	43642632	-	1380	-	GO:0004180;GO:0004185;GO:0004185;GO:0004185;GO:0006508;GO:0006508;GO:0006508;GO:0008233;GO:0016787;	K16297	EC:3.4.16.-	-	106343385	A0A0D3CLX0
Bo4g125490	2.11432860008656	1.0801996117605399	0.00153813	0.0123183	0.447452535389384	-1.16019344176221	0.000101392	0.00132358	C4	32513786	32514159	-	267	-	GO:0016020;GO:0016021;GO:0016021;	-	-	-	106342000	A0A0D3BYJ3
Bo8g068030	5.2034825352513101	2.3794774991529599	0.00154387	0.0123509	0.325020697766927	-1.62139650100811	0.00213121	0.0165182	C8	22177303	22178980	+	810	-	GO:0003677;GO:0003677;	K09422	-	-	106310800	A0A0D3DQ89
Bo4g035050	3.0709055900307098	1.61866415969634	0.00157605	0.0125706	2.63521270161993	1.39791941392612	7.10035e-05	0.000982802	C4	7666730	7667767	-	933	-	-	-	-	-	-	-
Bo6g047940	2.1955058123628799	1.1345533538477399	0.00157756	0.0125799	0.419212625295929	-1.25424592816099	4.3675e-05	0.000649739	C6	12908433	12909649	+	687	-	GO:0016020;GO:0016021;GO:0016021;	K19039	EC:2.3.2.27	-	106298671	A0A0D3CS08
Bo8g117120	2.3626180918536299	1.24038644204214	0.00160625	0.0127704	0.370103563472688	-1.43399906846397	2.88337e-05	0.000450639	C8	41087968	41092965	+	4674	-	GO:0003779;GO:0003779;	-	-	-	106311660	A0A0D3DZ66
Bo4g001140	2.7203809511649002	1.4438086948112701	0.00163985	0.0130264	2.77176525672606	1.47080507951783	8.3556e-06	0.000154321	C4	100688	103579	+	1113	-	GO:0003824;GO:0003824;GO:0004333;GO:0004333;GO:0006099;GO:0006099;GO:0006106;GO:0006106;GO:0016020;GO:0016021;GO:0016021;GO:0016829;GO:0016829;GO:0045239;GO:0045239;	-	-	-	-	-
Bo2g042150	2.5925928062716501	1.37439563368707	0.00166037	0.0131641	5.19162186926929	2.37618530876151	4.00991e-06	8.18617e-05	C2	11685608	11688929	+	1587	-	GO:0016020;GO:0016020;	-	-	-	-	-
Bo8g101160	2.7903435117084801	1.4804427393061299	0.00175605	0.0138138	2.30016533240904	1.20173756363662	0.00255308	0.0190323	C8	35429298	35430450	-	993	-	GO:0004601;GO:0004601;GO:0004601;GO:0005576;GO:0005576;GO:0006979;GO:0006979;GO:0006979;GO:0016491;GO:0020037;GO:0020037;GO:0020037;GO:0042744;GO:0042744;GO:0042744;GO:0046872;GO:0046872;GO:0055114;GO:0055114;GO:0055114;GO:0098869;	K00430	EC:1.11.1.7	-	106309520	A0A0D3DW15
Bo1g105830	2.1687324020038701	1.1168520511111899	0.00175666	0.0138157	0.163061831092764	-2.61650897401179	2.3746e-16	4.53112e-14	C1	32691931	32694139	+	1737	-	GO:0016020;GO:0016020;GO:0016020;GO:0016021;GO:0016021;GO:0022857;GO:0022857;GO:0055085;GO:0055085;	-	-	-	106314351	A0A0D3ABS2
Bo4g045420	2.04247881033639	1.03032111123207	0.00179279	0.0140607	0.350884205954394	-1.51093308446301	5.62052e-07	1.4232e-05	C4	10386605	10390599	-	2031	-	GO:0004842;GO:0005515;GO:0005634;GO:0006281;GO:0009640;GO:0009641;GO:0009649;GO:0010119;GO:0016567;GO:0016604;GO:0042802;GO:0046283;GO:0048573;GO:0061630;	K10143	EC:2.3.2.27	-	106342740	A0A0D3BSM6
Bo2g061150	Inf	Inf	0.00179326	0.0140607	3.05650274203765	1.61188186136821	0.00490636	0.0317873	C2	17817143	17823398	-	492	-	GO:0008270;GO:0008270;GO:0046872;	-	-	-	-	-
Bo5g030300	2.04912515747337	1.0350081046770101	0.00179382	0.0140607	0.357918326231473	-1.48229767997805	3.92014e-07	1.02814e-05	C5	10284108	10285719	+	417	-	GO:0016020;GO:0016021;GO:0016021;	-	-	-	-	-
Bo3g035840	24.321211851312	4.60414321052414	0.00182215	0.0142435	77.8876231854884	6.28332218841752	1.10026e-15	1.76608e-13	C3	14002733	14002918	+	186	-	GO:0016020;GO:0016021;GO:0016021;	-	-	-	106333350	A0A0D3B6A9
Bo3g023120	2.04962242565023	1.03535816591973	0.00183882	0.0143497	0.24750728524567	-2.01445710410677	8.99804e-12	6.08548e-10	C3	8270542	8272820	+	1047	-	GO:0003677;GO:0003677;GO:0003677;GO:0005634;GO:0005634;GO:0006351;GO:0006351;GO:0006355;GO:0006355;	-	-	-	106328813	A0A0D3B3T3
Bo7g064140	13.7695335248942	3.7834077805242798	0.00184704	0.0143927	0.115403091081271	-3.11524622768129	0.000511255	0.00515331	C7	24008795	24009961	-	1167	-	-	-	-	-	106304403	A0A0D3D897
Bo3g055600	3.1598867837901201	1.6598728687218001	0.00186021	0.0144733	0.187247703733157	-2.41698006823591	1.99423e-06	4.43425e-05	C3	21998736	21999422	-	687	-	GO:0005515;GO:0005634;GO:0005634;	-	-	-	106331962	A0A0D3B9E4
Bo2g092480	2.5313099654919902	1.33988418002762	0.00188324	0.0146262	0.413825288192286	-1.27290628624123	0.000300162	0.00329817	C2	24960028	24964462	+	2133	-	-	-	-	-	-	-
Bo3g001720	3.3509693151086801	1.7445784758162599	0.00193636	0.0149725	0.422020806983394	-1.24461396469483	0.00341608	0.0239298	C3	348647	349397	+	456	-	GO:0005886;GO:0005886;GO:0016020;GO:0016021;GO:0016021;	-	-	-	106331706	A0A0D3AZD7
Bo8g115200	8.7469441371552303	3.1287790800080901	0.00193674	0.0149725	0.388812165835694	-1.36285473366942	0.0247101	0.109999	C8	40643318	40643823	+	270	-	GO:0016020;GO:0016021;GO:0016021;	-	-	-	-	-
Bo7g011500	3.8205139824764398	1.93376674037842	0.00195079	0.0150676	0.400390774771262	-1.32051936083602	0.00392089	0.0266647	C7	3878046	3879127	+	312	-	GO:0046983;	-	-	-	-	-
Bo1g108950	9.1555447527224896	3.1946457285862402	0.00195974	0.0151252	0.378418925899547	-1.40194385076972	0.0323067	0.133633	C1	33928194	33928520	+	327	-	-	-	-	-	106338075	A0A0D3AC36
Bo7g108190	2.6262955269758601	1.39302926631213	0.00197352	0.015219	2.84322631901269	1.50752894119692	6.02241e-06	0.000116042	C7	42490270	42491678	-	987	-	-	-	-	-	106303695	A0A0D3DFH0
Bo6g024810	2.1000999480185398	1.0704579903101501	0.00198655	0.0153035	0.397719155307174	-1.33017804669657	4.81761e-06	9.56052e-05	C6	5364828	5366396	-	1095	-	GO:0003700;GO:0003700;GO:0005634;GO:0005634;GO:0006355;GO:0010119;GO:0010119;GO:0042335;GO:0042335;GO:0046983;GO:0046983;GO:0048573;GO:0048573;	-	-	-	106296295	A0A0D3CPX9
Bo7g115690	3.6139750192833402	1.85358653396106	0.00199967	0.0153855	0.168219660829826	-2.57158176311085	1.97452e-07	5.54111e-06	C7	46107822	46108973	-	1152	-	GO:0008375;GO:0008375;GO:0016020;GO:0016020;	-	-	-	106302062	A0A0D3DHC1
Bo6g068200	2.3501292846947601	1.23274012413391	0.00200613	0.0154225	0.391987817822788	-1.35111927585236	5.30139e-05	0.00076612	C6	19448093	19448665	+	573	-	-	-	-	-	106298416	A0A0D3CTU8
Bo8g083500	2.1279278373829902	1.08944922677193	0.00202071	0.0155153	0.487976492859018	-1.03511644392822	0.000622349	0.00607091	C8	29034353	29036386	+	1872	-	GO:0003700;GO:0003700;GO:0005634;GO:0005634;GO:0006351;GO:0006351;GO:0006355;GO:0008356;GO:0008356;GO:0009630;GO:0009630;GO:0009956;GO:0009956;GO:0043565;GO:0043565;GO:0048366;GO:0048366;GO:0051457;GO:0051457;GO:0090610;GO:0090610;	-	-	-	106312242	A0A0D3DSZ2
Bo5g007530	3.4941504458001398	1.8049417269544601	0.00203155	0.0155793	9.65228734147473	3.27087086416019	2.87923e-08	9.74508e-07	C5	2396765	2398919	-	906	-	-	-	-	-	-	-
Bo7g106420	3.6464108599732299	1.86647712644857	0.0020495	0.0156975	0.446471063466825	-1.1633614199792	0.00492106	0.0318422	C7	41284185	41284514	+	330	-	-	-	-	-	106304898	A0A0D3DEZ4
Bo3g003830	14.0251206303302	3.8099412744223802	0.00206033	0.0157554	0.275527789228273	-1.85973026117267	0.01061	0.057643	C3	1362740	1363255	-	516	-	-	-	-	-	106333395	A0A0D3AZZ8
Bo1g147890	3.1891684236932298	1.6731802900049599	0.00211683	0.0161236	0.124685875895677	-3.00363004535198	6.94439e-08	2.17157e-06	C1	41932120	41934280	-	963	-	GO:0003677;GO:0003677;	K09422	-	-	106293259	A0A0D3AFA8
Bo5g128890	Inf	Inf	0.00218995	0.0165585	5.6291176100753	2.49290879098417	1.1228e-06	2.64438e-05	C5	39889494	39891074	+	1239	-	-	-	-	-	-	-
Bo5g108600	2.43362306648867	1.28310573246462	0.0022257	0.0167913	0.441627063266997	-1.17909951053229	0.000588428	0.00579442	C5	33886778	33888993	-	1308	-	GO:0003993;GO:0003993;GO:0003993;GO:0016311;GO:0016787;GO:0016787;GO:0016787;GO:0046872;GO:0046872;	K22390	-	-	106295796	A0A0D3CI07
Bo9g179030	2.7646388063982599	1.4670910080345601	0.00222761	0.0167989	0.0637798192652314	-3.97075618038655	1.90017e-17	4.38681e-15	C9	53344245	53345790	-	603	-	GO:0005886;GO:0005886;	-	-	-	-	-
Bo6g018580	7.3765463995185199	2.8829455238095201	0.00223129	0.0168179	0.372885571522054	-1.42319512050657	0.0234955	0.105591	C6	4101862	4102827	+	966	-	GO:0008152;GO:0008152;GO:0016787;GO:0016787;	-	-	-	106296982	A0A0D3CPK1
Bo8g104260	41.595064840097002	5.3783404609199996	0.00223981	0.016867	2.50314490139113	1.32374180779317	0.0168828	0.082482	C8	36511132	36514608	+	2028	-	GO:0004672;GO:0004672;GO:0005524;GO:0005524;GO:0006468;GO:0006468;	-	-	-	106312391	-
Bo8g107890	14.051280561942001	3.8126297111824399	0.00227298	0.0170995	0.31955093094917	-1.64588220449153	0.02294	0.103597	C8	38424228	38424911	-	684	-	GO:0003677;GO:0003677;GO:0003677;GO:0003700;GO:0003700;GO:0005634;GO:0005634;GO:0006351;GO:0006351;GO:0006355;GO:0006355;GO:0006355;	-	-	-	106308448	A0A0D3DXN9
Bo9g043900	6.9060125193419397	2.7878529495368198	0.00229962	0.0172824	0.244800625973908	-2.03032084777061	0.00125947	0.0107839	C9	14393617	14394993	+	1038	-	GO:0016491;GO:0016491;GO:0055114;GO:0055114;	-	-	-	106318041	A0A0D3E5A4
Bo3g060520	2.1457550613912	1.10148540140468	0.0023046	0.0173129	0.409732839589795	-1.28724456717858	3.3407e-05	0.000512899	C3	22996789	22999459	+	1314	-	GO:0008270;GO:0008270;GO:0016020;GO:0016021;GO:0016021;GO:0046872;	-	-	-	106335411	A0A0D3B9Y9
Bo3g064170	2.5411572181830002	1.3454856358699501	0.00230685	0.0173263	0.14185434217903	-2.81751778252483	2.94661e-10	1.47331e-08	C3	24459345	24461750	+	1500	-	-	-	-	-	106329318	A0A0D3BAQ5
Bo4g173010	2.0405647789638302	1.02896851055016	0.00239185	0.0178709	0.306932204332308	-1.70400806885159	1.02566e-08	3.77558e-07	C4	45749442	45750734	-	1293	-	GO:0000166;GO:0004672;GO:0004672;GO:0004674;GO:0004674;GO:0005524;GO:0005524;GO:0005524;GO:0006468;GO:0006468;GO:0007165;GO:0007165;GO:0016301;GO:0016310;GO:0016740;	-	-	-	106336996	A0A0D3C327
Bo3g153420	2.2522780456670501	1.1713849403594101	0.0023942	0.0178849	0.432561907753961	-1.20902147053553	0.000194222	0.00228713	C3	54693628	54696280	-	1530	-	-	-	-	-	106328389	A0A0D3BJT8
Bo4g001010	2.0289804674153502	1.02075497662801	0.00244729	0.018223	0.326220589789717	-1.61608025259823	5.22794e-08	1.68411e-06	C4	25303	27420	-	1302	-	-	-	-	-	106337048	A0A0D3BNF5
Bo7g093030	3.9155153983246902	1.9692022216076299	0.00248117	0.0184383	0.449799188938505	-1.15264703518437	0.0226429	0.102561	C7	35717447	35719268	+	957	-	GO:0003700;GO:0003700;GO:0006355;GO:0006355;	-	-	-	106301585	A0A0D3DCA1
Bo2g120530	2.0395659050772599	1.02826212610172	0.00252433	0.0187292	0.49868143322526	-1.0038096049232	0.000699557	0.00665736	C2	37264817	37267297	+	1584	-	GO:0003824;GO:0003824;GO:0006633;GO:0006633;GO:0006633;GO:0008152;GO:0008152;GO:0016020;GO:0016020;GO:0016020;GO:0016021;GO:0016021;GO:0016740;GO:0016746;GO:0016747;GO:0016747;	K15397	EC:2.3.1.199	-	106327444	A0A0D3ATU4
Bo1g002940	4.2567401616609297	2.0897490283568199	0.00258025	0.0190946	0.485684655188142	-1.04190818858272	0.0311364	0.130025	C1	462750	465039	-	1236	-	GO:0005515;	-	-	-	-	-
Bo8g100720	2.7393112670235999	1.4538132083130699	0.00259565	0.0191818	5.63478424379737	2.49436037058156	1.55065e-13	1.50244e-11	C8	35048592	35054086	+	4578	-	GO:0003677;GO:0003677;GO:0003682;GO:0003682;GO:0003682;GO:0003886;GO:0003886;GO:0003886;GO:0005634;GO:0005634;GO:0005634;GO:0006349;GO:0006349;GO:0008168;GO:0008168;GO:0008168;GO:0009294;GO:0009294;GO:0009910;GO:0009910;GO:0010069;GO:0010069;GO:0010216;GO:0010216;GO:0010424;GO:0010424;GO:0016740;GO:0032259;GO:0090116;GO:0090116;	-	-	-	-	-
Bo9g059820	2.7547413923519199	1.46191688885694	0.00272943	0.0200388	0.367061831851939	-1.4459049882427	0.000222314	0.00257256	C9	18118944	18121430	-	1911	-	GO:0004672;GO:0004672;GO:0005524;GO:0005524;GO:0006468;GO:0006468;	-	-	-	106312991	A0A0D3E6F8
Bo9g058820	2.0634102838758701	1.0450307119959401	0.00277932	0.0203452	2.04283231003131	1.03057078242874	0.000740448	0.00697726	C9	17254266	17254914	+	372	-	GO:0005618;GO:0005618;GO:0005737;GO:0005739;GO:0005739;GO:0005773;GO:0005773;GO:0005794;GO:0005794;GO:0005829;GO:0005829;GO:0005886;GO:0005886;GO:0006457;GO:0006457;GO:0006662;GO:0006662;GO:0009408;GO:0009506;GO:0009506;GO:0009507;GO:0009570;GO:0009570;GO:0009735;GO:0009735;GO:0010188;GO:0010188;GO:0010286;GO:0010286;GO:0015035;GO:0015035;GO:0016020;GO:0016671;GO:0016671;GO:0045454;GO:0045454;GO:…	K03671	-	-	106317483	A0A0D3E658
Bo1g147870	2.2642505935600798	1.1790336357668301	0.00281976	0.0206088	0.232354646036871	-2.10559960240653	2.55082e-08	8.71238e-07	C1	41912965	41915662	+	1491	-	GO:0004335;GO:0004335;GO:0005524;GO:0005524;GO:0005534;GO:0005534;GO:0005737;GO:0005737;GO:0006012;GO:0006012;GO:0008152;GO:0008152;GO:0016301;GO:0016301;GO:0016773;GO:0016773;GO:0046835;GO:0046835;	K18674	EC:2.7.1.157	-	106328312	A0A0D3AFA6
Bo4g192880	3.1579034840342399	1.6589670783441299	0.00304837	0.0220245	2.48614756530412	1.3139119301049	0.00617415	0.0379523	C4	52054600	52056346	+	1224	-	GO:0046983;GO:0046983;	K16189	-	-	106337536	A0A0D3C5X4
Bo5g146650	Inf	Inf	0.00305239	0.0220456	3.35791598297838	1.7475661336529	0.0456939	0.172013	C5	45282711	45285876	+	1524	-	GO:0004672;GO:0004672;GO:0005524;GO:0005524;GO:0006468;GO:0006468;	-	-	-	-	-
Bo1g153270	2.6582723167740498	1.4104889036869801	0.00306622	0.0221234	0.361580902846694	-1.46760961208982	0.00241596	0.018265	C1	42809711	42810514	-	804	-	-	-	-	-	106343216	A0A0D3AFQ0
Bo2g152970	9.0875407359937697	3.1838899261006799	0.00313076	0.0224628	0.113324028771684	-3.1414742980339	0.000456706	0.00468866	C2	48038078	48039509	-	1311	-	GO:0016747;GO:0016747;	-	-	-	106321827	A0A0D3AX59
Bo5g106200	3.18855592799164	1.67290318661659	0.00314493	0.0225427	0.452327570545031	-1.14456016021288	0.00819029	0.0470244	C5	33581941	33583038	-	1098	-	GO:0005515;	-	-	-	106295795	A0A0D3CHW5
Bo4g026620	3.7438287239077899	1.90451443470203	0.00321932	0.0229786	0.377515157765575	-1.40539352304778	0.0269808	0.117171	C4	5147473	5150541	+	2409	-	-	-	-	-	106336725	-
Bo01965s020	2.5866776569052798	1.37110028140609	0.00325838	0.0232173	0.211841822031811	-2.23894065909035	1.67873e-08	5.97378e-07	Scaffold01965	690	2058	-	720	-	GO:0005515;	-	-	-	-	-
Bo4g137720	Inf	Inf	0.00327087	0.0232884	2.39972957235796	1.26287183641707	0.0439086	0.167142	C4	36595163	36595460	+	201	-	-	-	-	-	-	-
Bo2g012820	3.5611228764286902	1.8323322167051499	0.00330858	0.0235344	0.434192639849954	-1.20359282435109	0.00920884	0.0515304	C2	3818877	3821589	-	1422	-	GO:0000139;GO:0000139;GO:0005789;GO:0005789;GO:0008152;GO:0008152;GO:0010296;GO:0010296;GO:0016020;GO:0016020;GO:0016021;GO:0016021;GO:0016787;GO:0016787;GO:0016787;	-	-	-	-	-
Bo2g147630	6.8677197440107998	2.7798311674449598	0.00341801	0.0242249	0.440802675115757	-1.18179511561412	0.0476528	0.177317	C2	46187221	46187725	-	414	-	GO:0008420;GO:0070940;	-	-	-	-	-
Bo3g005100	4.5850753225933101	2.1969454342869001	0.00344082	0.0243772	0.424560294431128	-1.23595864052072	0.0274284	0.118784	C3	1947668	1949220	-	939	-	GO:0003677;GO:0003677;GO:0003677;GO:0005634;GO:0005634;GO:0006351;GO:0006351;GO:0006355;GO:0006355;GO:0006355;	-	-	-	-	-
Bo9g076230	2.84808989626117	1.5099946838195399	0.00344321	0.0243895	0.265645222358281	-1.91242732878068	5.86745e-06	0.000113524	C9	23055072	23059064	-	2382	-	GO:0000166;GO:0000226;GO:0003774;GO:0003777;GO:0003777;GO:0003777;GO:0005524;GO:0005524;GO:0005524;GO:0005634;GO:0005634;GO:0005874;GO:0005876;GO:0005876;GO:0007018;GO:0007018;GO:0008017;GO:0008017;GO:0051225;GO:0051225;	K10405	-	-	106319340	A0A0D3E810
Bo7g066990	2.6777700868940699	1.4210320963093499	0.00349978	0.0247103	0.396932774264122	-1.33303340602857	0.000615045	0.00600592	C7	25764536	25764955	+	420	-	-	-	-	-	106304175	A0A0D3D8T3
Bo7g059330	2.1696047810244101	1.11743226276859	0.00356372	0.0250761	2.23715702436156	1.16166652162602	0.000176769	0.00212441	C7	21554077	21555811	+	933	-	GO:0035091;GO:0047262;GO:0047262;	-	-	-	-	-
Bo4g139510	2.2053398983656902	1.14100102852451	0.00356458	0.0250774	0.452462492160945	-1.1441298930036	0.000486594	0.00494346	C4	37163263	37164179	-	774	-	-	-	-	-	106337517	A0A0D3C004
Bo1g011740	2.4957497208937598	1.3194732649174901	0.00362532	0.0254566	0.361291351737772	-1.46876537361924	7.14239e-05	0.00098716	C1	4201102	4203344	+	984	-	GO:0046983;GO:0046983;	-	-	-	106342143	A0A0D3A2Z9
Bo7g081140	Inf	Inf	0.00363616	0.0255086	3.84810636662826	1.9441486776127	0.00626528	0.0383882	C7	31243120	31245262	-	540	-	-	-	-	-	106304226	A0A0D3DAK6
Bo00285s580	3.4741083511862101	1.7966427498115101	0.00369736	0.025808	0.295251509899828	-1.75998365738373	0.00126294	0.0108013	Scaffold00285	463875	468597	+	2106	-	GO:0016747;GO:0016747;	-	-	-	-	-
Bo4g031180	32.221468787948197	5.0099503544436796	0.00371205	0.0258898	0.178327861328948	-2.48739597262582	0.0178055	0.0859665	C4	7138104	7139594	+	1491	-	GO:0008152;GO:0008152;GO:0016740;GO:0016757;GO:0016758;GO:0016758;	-	-	-	106337769	A0A0D3BRE2
Bo1g014600	2.0731495328941798	1.05182417944036	0.00375029	0.0261222	0.471704489485224	-1.08404476298901	0.000305518	0.00333812	C1	4832143	4834545	+	1956	-	GO:0003677;GO:0003677;GO:0003677;GO:0005515;GO:0005634;GO:0005634;GO:0005634;GO:0006351;GO:0006351;GO:0006355;GO:0006355;GO:0006355;GO:0009725;GO:0009725;GO:0009734;GO:0009734;	-	-	-	106302756	A0A0D3A387
Bo2g029180	2.0546466310029898	1.03889029291599	0.00377533	0.0262622	2.56756493801336	1.36040076517642	0.00372688	0.0256365	C2	8885340	8885786	+	447	-	GO:0016020;GO:0016021;GO:0016021;	-	-	-	106325274	A0A0D3ALE4
Bo5g095790	2.3972541549897302	1.2613828704829499	0.00384608	0.0266796	0.222798897576516	-2.16618600074096	9.44365e-09	3.50737e-07	C5	30918205	30918795	-	591	-	-	-	-	-	-	-
Bo5g009940	Inf	Inf	0.00393141	0.0271954	0.225356823817881	-2.14971695928199	0.0323089	0.133633	C5	3696017	3698282	-	972	-	GO:0003676;GO:0005576;GO:0005576;GO:0005618;GO:0005618;GO:0016787;GO:0016787;GO:0016787;GO:0071555;GO:0071555;	-	-	-	-	-
Bo7g064010	2.0708760343047499	1.0502411942891701	0.00393585	0.027211	0.359746379462978	-1.47494792732996	1.6396e-05	0.000277624	C7	23879033	23880337	+	1305	-	GO:0009617;GO:0009617;GO:0009697;GO:0009697;GO:0009753;GO:0009753;GO:0016747;GO:0016747;GO:1900150;GO:1900150;GO:1900424;GO:1900424;	-	-	-	106301274	A0A0D3D884
Bo3g042340	2.3690635146580599	1.2443168777904099	0.00403443	0.0277944	0.405703100910956	-1.30150376534845	0.000307974	0.00335878	C3	17353133	17355112	+	1980	-	GO:0003676;GO:0003676;GO:0008270;GO:0008270;	-	-	-	-	-
Bo7g080870	2.0060487414846802	1.0043566599101901	0.00409477	0.028158	0.267286926459606	-1.90353882069265	1.16517e-06	2.7304e-05	C7	31061342	31062310	+	690	-	GO:0003723;GO:0003723;GO:0033897;GO:0033897;GO:0090502;	K01166	EC:3.1.27.1	-	106304761	A0A0D3DAH9
Bo6g078060	2.5361914664282699	1.3426636639471801	0.00413552	0.0284067	0.386413645249103	-1.3717820545811	0.00029801	0.00328101	C6	23483915	23486001	-	1173	-	GO:0016020;GO:0016021;GO:0016021;GO:0055114;GO:0055114;	-	-	-	106297184	A0A0D3CV89
Bo9g028810	3.8509154727310002	1.94520145644828	0.00417964	0.0286305	2.23071801223728	1.15750815228253	0.00334172	0.0235042	C9	9784789	9790743	-	4380	-	GO:0003677;GO:0003677;GO:0003899;GO:0003899;GO:0003899;GO:0006351;GO:0006351;GO:0016740;GO:0016779;	K16250	EC:2.7.7.6	-	106319336	A0A0D3E3T5
Bo3g070140	21.497829169347298	4.4261190800631498	0.00421254	0.0288134	0.283491676744602	-1.81862171631795	0.0331429	0.136228	C3	27392670	27395852	+	2160	-	GO:0005216;GO:0005216;GO:0006811;GO:0006811;GO:0006811;GO:0016020;GO:0016020;GO:0016020;GO:0016021;GO:0016021;GO:0034220;GO:0055085;GO:0055085;	-	-	-	-	-
Bo6g094610	4.9794150831020199	2.31597628320324	0.00426827	0.0291313	2.70507739105869	1.43566986950474	0.00884623	0.0499696	C6	29218363	29222078	+	1467	-	GO:0000272;GO:0003824;GO:0003824;GO:0004553;GO:0004553;GO:0005975;GO:0005975;GO:0005975;GO:0008152;GO:0008810;GO:0008810;GO:0016787;GO:0016798;GO:0030245;GO:0030245;	-	-	-	106296254	A0A0D3CXF3
Bo3g064700	2.11165051569224	1.0783710842235501	0.00429626	0.0292951	0.433498918001293	-1.20589970235402	0.000161672	0.00196635	C3	24830216	24832629	-	1161	-	GO:0016020;GO:0016021;GO:0016021;GO:0016021;GO:0016765;GO:0016765;	K12501	EC:2.5.1.117	-	106328784	A0A0D3BAV8
Bo8g082540	4.4389492379727402	2.1502182106806398	0.00434786	0.0295652	0.183293857388231	-2.44776965633105	0.000254492	0.00288249	C8	28424749	28428842	+	2529	-	GO:0003824;GO:0003824;GO:0004356;GO:0004356;GO:0006542;GO:0006542;GO:0006807;GO:0006807;GO:0016787;GO:0016787;	-	-	-	106312504	A0A0D3DSP6
Bo2g012520	36.594657058252999	5.19356112049371	0.00442118	0.0299706	2.78854162390069	1.47951080590662	0.0155062	0.0771492	C2	3648727	3650346	+	1038	-	GO:0003677;GO:0003677;	-	-	-	-	-
Bo1g016150	12.5603489160777	3.6508046365454998	0.00445465	0.0301645	3.46040251325335	1.79093986159019	0.000324111	0.00350036	C1	5191280	5193093	+	993	-	GO:0008610;GO:0008610;GO:0008780;GO:0008780;	-	-	-	-	-
Bo7g071490	3.1944698845381798	1.67557653887105	0.00445749	0.0301772	0.184155030174925	-2.44100729005098	2.30648e-06	5.01525e-05	C7	27353227	27356712	-	1170	-	GO:0008270;GO:0008270;GO:0016491;GO:0016491;GO:0046872;GO:0055114;GO:0055114;	K00121	-	-	106301480	A0A0D3D986
Bo5g025240	2.1652915503640302	1.11456129282524	0.00451009	0.0304402	0.301710618778302	-1.72876262150781	2.25427e-08	7.80646e-07	C5	8692762	8702626	-	4140	-	GO:0003824;GO:0003824;GO:0004616;GO:0004616;GO:0005634;GO:0005634;GO:0005975;GO:0005975;GO:0008270;GO:0008270;GO:0016491;GO:0016491;GO:0016832;GO:0016832;GO:0050661;GO:0051287;GO:0051287;GO:0055114;GO:0055114;	-	-	-	-	-
Bo2g012870	2.1972859664237898	1.1357226419477	0.00451316	0.0304467	0.437663258373087	-1.19210681940443	0.0259406	0.113831	C2	3839171	3839625	+	198	-	-	-	-	-	-	-
Bo2g134560	3.0486306629708899	1.60816138059514	0.00451521	0.0304467	3.2579028573718	1.70394358689677	1.16342e-06	2.72801e-05	C2	42282314	42284283	+	1314	-	GO:0000160;GO:0000160;GO:0000160;GO:0003677;GO:0003677;GO:0003677;GO:0003700;GO:0003700;GO:0003700;GO:0005634;GO:0005634;GO:0006351;GO:0006351;GO:0006355;GO:0007165;GO:0007165;	-	-	-	-	-
Bo5g128980	4.1744633426365496	2.06159074065702	0.00455639	0.0306748	9.22440370398182	3.20545565359979	1.61079e-11	1.02805e-09	C5	39948062	39949995	-	1539	-	GO:0005506;GO:0005506;GO:0016020;GO:0016021;GO:0016021;GO:0016705;GO:0016705;GO:0020037;GO:0020037;GO:0055114;GO:0055114;	-	-	-	106343330	-
Bo1g017450	10.8195353604281	3.4355666395604598	0.00456407	0.030721	0.0328808207185425	-4.9266098800558	3.36889e-06	7.01931e-05	C1	6047130	6050144	+	1233	-	GO:0005488;	-	-	-	-	-
Bo7g044830	Inf	Inf	0.00456804	0.0307366	6.20619707579659	2.63370950991209	3.10608e-07	8.3694e-06	C7	16322636	16323777	-	921	-	-	-	-	-	-	-
Bo3g077410	7.4420191158992202	2.8956940962386901	0.00457277	0.0307573	0.315434324190775	-1.66458843841945	0.0124639	0.0652779	C3	29037943	29040926	+	1044	-	GO:0000166;GO:0000275;GO:0000275;GO:0004672;GO:0004672;GO:0004674;GO:0004674;GO:0005524;GO:0005524;GO:0005524;GO:0006468;GO:0006468;GO:0015986;GO:0015986;GO:0046933;GO:0046933;GO:0099132;	-	-	-	-	-
Bo6g111020	5.1262557574702701	2.3579054588927302	0.00463979	0.0311518	0.160759838575931	-2.63702106103333	4.21743e-05	0.000630424	C6	34944996	34947765	-	1182	-	-	-	-	-	-	-
Bo7g059720	2.2786614850937399	1.1881866156734999	0.00470114	0.0314955	0.233851923489991	-2.09633279955767	7.04675e-09	2.68379e-07	C7	21883961	21884584	-	624	-	-	-	-	-	106304821	A0A0D3D7K3
Bo1g141000	2.1295351494378099	1.09053854275565	0.00473601	0.0316985	0.383864399926687	-1.38133132587403	2.1322e-05	0.000346262	C1	40258683	40260448	+	1215	-	GO:0005634;GO:0005634;	K21777	-	-	106342648	A0A0D3AEG5
Bo6g012220	15.265833042379001	3.9322344131131701	0.00481816	0.0321579	2.54047807217868	1.3451000117461	0.0147578	0.0743254	C6	2775488	2775718	+	231	-	-	-	-	-	106298937	A0A0D3CP60
Bo8g094890	4.6753501518668603	2.2250744170740302	0.00486078	0.0324017	0.219809768174284	-2.18567259493569	0.00237612	0.0180184	C8	32324174	32327330	+	1545	-	GO:0004553;GO:0004553;GO:0005975;GO:0005975;	K01188	EC:3.2.1.21	-	106307383	A0A0D3DUI7
Bo8g001030	3.3737004817688301	1.7543318963736101	0.00492525	0.0327401	0.334074380974093	-1.58175874333923	0.00167458	0.0136204	C8	20876	23069	-	2040	-	GO:0006629;GO:0006629;GO:0016020;GO:0016021;GO:0016021;GO:0016787;GO:0016787;	-	-	-	106311999	A0A0D3DIJ5
Bo2g089970	Inf	Inf	0.00498145	0.0330404	2.70727542283161	1.43684166662214	0.0209594	0.0969789	C2	24408450	24410834	-	1332	-	-	-	-	-	106325735	A0A0D3AR18
Bo2g131910	7.4628552654843698	2.8997277067865102	0.00499525	0.0331201	3.91665224449191	1.96962103857223	4.47558e-05	0.000663969	C2	41028049	41028729	-	315	-	-	-	-	-	-	-
Bo2g089860	3.8276062662897798	1.93644243199576	0.00500839	0.0331895	0.458190242702041	-1.1259813585391	0.0344983	0.140243	C2	24287576	24290782	-	1371	-	GO:0000166;GO:0004672;GO:0004672;GO:0004674;GO:0004674;GO:0005524;GO:0005524;GO:0005524;GO:0006468;GO:0006468;	-	-	-	106320808	A0A0D3AR07
Bo2g047790	2.7432820739136199	1.4559029727927499	0.00507055	0.0335357	0.38195586559435	-1.38852214816207	0.000782317	0.00730371	C2	13284135	13284713	+	579	-	GO:0016020;GO:0016021;GO:0016021;	-	-	-	-	-
Bo3g009510	2.2073089583355898	1.1422885786263199	0.00507596	0.0335596	0.481155538996095	-1.05542475792895	0.00180393	0.0144469	C3	3243115	3244350	-	1236	-	GO:0005515;	-	-	-	106334653	A0A0D3B118
Bo5g039800	7.9029310901190604	2.9823878285940602	0.00520857	0.0342719	0.310060615675818	-1.68937781039985	0.0136973	0.0702801	C5	13152413	13154256	+	630	-	GO:0004089;GO:0004089;GO:0004089;GO:0008270;GO:0008270;GO:0008270;GO:0016829;	-	-	-	-	-
Bo9g066910	4.2349179311638396	2.0823340117179998	0.00522592	0.0343618	0.164648723685806	-2.60253676630846	0.000319578	0.0034634	C9	20132869	20138177	+	2130	-	-	-	-	-	-	-
Bo6g094710	8.6336119602424208	3.1099642519823099	0.00523595	0.0343974	0.0191959189412727	-5.70305656367252	2.36083e-07	6.55494e-06	C6	29275497	29276489	+	546	-	GO:0000166;GO:0005525;GO:0005525;GO:0005525;GO:0005622;GO:0005622;GO:0007264;	K07937	-	-	106298691	A0A0D3CXG3
Bo1g022570	4.08489610475183	2.03029938533169	0.00524607	0.0344456	4.13894304322321	2.04926239550592	9.73855e-08	2.9444e-06	C1	8470155	8471378	-	1224	-	GO:0016020;GO:0016021;GO:0016021;	-	-	-	106325310	A0A0D3A4N7
Bo6g110870	3.2670114875708798	1.7079715276356	0.00535227	0.0349508	0.304182786512005	-1.71698958060344	0.000282563	0.00313679	C6	34796549	34797869	+	1242	-	GO:0005794;GO:0005794;GO:0010411;GO:0010411;GO:0016020;GO:0016021;GO:0016021;GO:0016413;GO:0016413;	-	-	-	106298225	A0A0D3CZI8
Bo15073s010	Inf	Inf	0.00544284	0.0354685	3.4125187984249	1.77083699337892	0.0135477	0.0696378	Scaffold15073	1	434	+	266	-	GO:0000166;GO:0003924;GO:0003924;GO:0003924;GO:0005200;GO:0005200;GO:0005525;GO:0005525;GO:0005525;GO:0005874;GO:0005874;GO:0005874;GO:0007010;GO:0007017;GO:0007017;	-	-	-	-	-
Bo8g105270	2.28724574199344	1.1936113774282799	0.00545589	0.0355411	0.106056645067752	-3.23709307792317	7.32281e-11	4.09377e-09	C8	37038008	37038791	+	450	-	-	-	-	-	106310001	A0A0D3DWX7
Bo8g077900	2.8173992820282399	1.4943640370468001	0.00546784	0.0355928	0.379952626077801	-1.3961085457608	0.00113726	0.00994005	C8	25873782	25879276	-	3207	-	GO:0004843;GO:0004843;GO:0005515;GO:0006511;GO:0006511;GO:0016579;GO:0016579;GO:0036459;GO:0036459;	K11858	EC:3.4.19.12	-	106312028	A0A0D3DRN1
Bo7g048540	10.373470077179	3.3748266723278202	0.00552515	0.0359043	0	-Inf	1.16634e-07	3.45378e-06	C7	17994965	17996353	-	588	-	-	-	-	-	106302175	A0A0D3D6C8
Bo8g107440	4.9249538543685301	2.3001102069272701	0.00556121	0.0361071	2.40221750216971	1.26436678180774	0.00317926	0.0226011	C8	38177540	38178909	-	834	-	GO:0003676;GO:0003676;GO:0003723;GO:0003723;	-	-	-	-	-
Bo6g087080	3.79988324656426	1.92595509166401	0.00559025	0.0362363	2.87889578157648	1.52551556308536	0.000839372	0.0077431	C6	27424343	27425041	+	699	-	GO:0016020;GO:0016021;GO:0016021;GO:0046872;GO:0046872;	-	-	-	106296850	A0A0D3CWP5
Bo9g170020	4.3799050122190799	2.1308995821811401	0.00564263	0.0364703	2.5221861338681	1.33467474850494	0.00141616	0.0118594	C9	50245433	50247177	-	759	-	GO:0016020;GO:0016021;GO:0016021;	-	-	-	106313901	A0A0D3EG55
Bo6g118070	2.7553415557754	1.46223116826302	0.00569113	0.0367154	0.45125327041715	-1.14799070704821	0.00459319	0.0302226	C6	36744705	36746520	-	1002	-	-	-	-	-	-	-
Bo1g042930	6.4556203528690999	2.6905557379809402	0.00580356	0.0373612	0.357393454691699	-1.48441488180145	0.0156495	0.0776897	C1	13059597	13063885	-	2220	-	GO:0004553;GO:0004553;GO:0004565;GO:0004565;GO:0005975;GO:0005975;GO:0008152;GO:0016787;GO:0016798;	-	-	-	-	-
Bo8g100360	3.0948859533409698	1.6298862470547499	0.00586129	0.0376742	0.398908203301385	-1.32587130302273	0.00312636	0.0222971	C8	34826380	34828126	+	792	-	-	-	-	-	106307186	A0A0D3DVT5
Bo5g010800	2.83665533902363	1.50419087007361	0.00587787	0.0377639	0.19019051530355	-2.39448279330362	2.12487e-06	4.67746e-05	C5	4138581	4139362	-	684	-	GO:0005515;	K00799	EC:2.5.1.18	-	106295499	A0A0D3C912
Bo9g117710	2.5892371407617198	1.37252710356691	0.00592574	0.0380032	0.412348733905957	-1.27806311702408	0.00186455	0.014815	C9	37433847	37436793	-	2229	-	GO:0005515;	-	-	-	106319456	A0A0D3EB39
Bo2g017660	2.3187686422401401	1.21335888063771	0.00613068	0.0391354	0.425342339996095	-1.23330362209613	0.000699162	0.00665699	C2	4957593	4959158	-	1194	-	GO:0004190;GO:0004190;GO:0006508;GO:0006508;	-	-	-	106321516	A0A0D3AJT6
Bo9g069830	2.1105258758113501	1.0776025173675601	0.00614079	0.0391932	0.124453221832192	-3.0063245157443	3.61896e-11	2.15182e-09	C9	20851091	20851522	+	432	-	-	K16282	EC:2.3.2.27	-	106316131	A0A0D3E7B6
Bo3g184480	2.1240309744092798	1.0868048048901	0.00630526	0.0399619	0.480134621601882	-1.05848912512194	0.00673075	0.0405754	C3	63975324	63978659	-	1530	-	GO:0005829;GO:0005829;GO:0008152;GO:0008152;GO:0009269;GO:0009269;GO:0009651;GO:0009651;GO:0009737;GO:0009737;GO:0016491;GO:0016491;GO:0016491;GO:0016620;GO:0016620;GO:0055114;GO:0055114;GO:0055114;	K14085	-	-	106336455	A0A0D3BN13
Bo7g019710	2.7675177504716202	1.4685925702806299	0.00639315	0.040457	0.32045873713216	-1.64178949020316	0.000278318	0.003098	C7	6809412	6810935	-	1524	-	GO:0003824;GO:0003824;GO:0006633;GO:0006633;GO:0006633;GO:0008152;GO:0008152;GO:0016020;GO:0016020;GO:0016020;GO:0016021;GO:0016021;GO:0016740;GO:0016746;GO:0016747;GO:0016747;	-	-	-	-	-
Bo5g093210	2.2208763935407001	1.1511290995988599	0.00650197	0.0410131	0.275651117766565	-1.85908464331138	2.41324e-07	6.69549e-06	C5	30255312	30256589	-	1278	-	GO:0000166;GO:0004672;GO:0004672;GO:0004674;GO:0004674;GO:0005524;GO:0005524;GO:0005524;GO:0006468;GO:0006468;GO:0007165;GO:0007165;GO:0016301;GO:0016310;GO:0016740;	-	-	-	106295250	A0A0D3CH06
Bo7g110320	Inf	Inf	0.0065458	0.0412267	2.50686510088289	1.32588436413214	0.0487013	0.180108	C7	43728042	43728689	-	648	-	GO:0003677;GO:0003677;GO:0003677;GO:0003700;GO:0003700;GO:0005634;GO:0005634;GO:0006351;GO:0006351;GO:0006355;GO:0006355;GO:0006355;	K09286	-	-	106303527	A0A0D3DG33
Bo3g018010	3.0521845969012298	1.60984221937439	0.00657209	0.0413573	0.345598522534611	-1.53283104502645	0.00237222	0.0179962	C3	5945780	5947540	+	1119	-	-	-	-	-	-	-
Bo1g143630	7.6933128382784499	2.9436049748021	0.00657322	0.0413574	0.120864603770121	-3.04853629399044	0.000164972	0.00199805	C1	40694158	40696388	+	978	-	GO:0005618;GO:0005618;GO:0016787;GO:0030599;GO:0030599;GO:0030599;GO:0042545;GO:0042545;GO:0042545;GO:0045330;GO:0045330;GO:0045490;GO:0045490;	-	-	-	-	-
Bo8g083320	34.744168492975902	5.1186989492053199	0.00665491	0.0417373	3.00930928891338	1.5894323907027	0.00480982	0.0312847	C8	28929869	28934316	+	2982	-	GO:0006189;GO:0006189;	-	-	-	-	-
Bo3g158580	2.07495875137543	1.05308265704867	0.00690855	0.0430307	0.427814332613098	-1.22494327848196	0.000212753	0.00247495	C3	56520516	56523321	-	1776	-	GO:0008168;GO:0008168;GO:0016020;GO:0016021;GO:0016021;GO:0032259;	-	-	-	106336123	A0A0D3BKF7
Bo7g099130	3.5867318739081	1.84266990067841	0.00703493	0.0436936	2.81768689871681	1.49451130832441	0.000107421	0.00139256	C7	38862210	38863508	-	831	-	GO:0005741;GO:0005741;GO:0055085;GO:0055085;	K15040	-	-	106303755	A0A0D3DDR2
Bo8g095500	5.6582686094091299	2.5003606659996498	0.00707651	0.0439211	0.13573957448788	-2.88108669915774	5.46372e-05	0.000784125	C8	32651292	32652176	+	657	-	-	-	-	-	106310970	A0A0D3DUP8
Bo5g145430	2.5418598683906901	1.3458844973962101	0.00715286	0.044293	0.239321108550623	-2.06298044411103	1.09897e-06	2.59365e-05	C5	45082017	45090472	-	2034	-	GO:0005215;GO:0005215;GO:0005509;GO:0005509;GO:0009523;GO:0009523;GO:0009654;GO:0009654;GO:0015979;GO:0015979;GO:0016020;GO:0016020;GO:0016020;GO:0016021;GO:0016021;GO:0016021;GO:0019898;GO:0019898;GO:0022857;GO:0022857;GO:0055085;GO:0055085;	-	-	-	-	-
Bo1g008620	2.2647671969760999	1.1793627584261399	0.00727355	0.0449207	0.433939134043845	-1.20443539592998	0.00271393	0.0199962	C1	3072933	3075297	+	1464	-	GO:0000323;GO:0000323;GO:0004175;GO:0004197;GO:0004197;GO:0006508;GO:0006508;GO:0006624;GO:0006624;GO:0008233;GO:0008233;GO:0009611;GO:0009611;GO:0009723;GO:0009723;GO:0009751;GO:0009751;GO:0009753;GO:0009753;GO:0010150;GO:0010150;	K01369	EC:3.4.22.34	-	106308848	A0A0D3A2D6
Bo3g064870	3.0232876072998498	1.59611823000377	0.0072893	0.0449884	2.27728720913867	1.18731625417543	0.00201872	0.0157884	C3	24910887	24912448	+	903	-	GO:0003824;GO:0003824;GO:0004488;GO:0004488;GO:0055114;GO:0055114;	-	-	-	106334600	A0A0D3BAX5
Bo2g159220	5.4160588053088601	2.4372434031793202	0.00734653	0.0452436	32.5443059371209	5.02433324150775	0.0151907	0.0760043	C2	49814199	49815478	+	807	-	GO:0003993;GO:0003993;GO:0016311;	K20728	-	-	106325058	A0A0D3AXT8
Bo3g007080	3.2259276803774899	1.6897140961717201	0.00745937	0.0457721	0.26037404744913	-1.94134243855876	0.000761733	0.00714705	C3	2510630	2513185	-	1353	-	GO:0003824;GO:0003824;GO:0004069;GO:0004069;GO:0006520;GO:0006520;GO:0008483;GO:0008483;GO:0008483;GO:0009058;GO:0009058;GO:0016740;GO:0030170;GO:0030170;GO:0080130;	K14454	EC:2.6.1.1	-	106335545	A0A0D3B0M4
Bo3g012910	2.46378236180795	1.30087482120817	0.00751548	0.0460026	0.479335511373754	-1.0608922695038	0.0026059	0.019365	C3	4386772	4387056	-	285	-	GO:0009733;GO:0009733;	K14488	-	-	106332697	A0A0D3B1Q9
Bo01074s070	4.5971985018456296	2.2007549614441402	0.00764929	0.0466759	0.462993767085104	-1.11093532312094	0.0467043	0.174762	Scaffold01074	29959	30966	-	489	-	GO:0008152;GO:0008152;GO:0016624;GO:0016624;GO:0055114;	-	-	-	-	-
Bo2g103310	Inf	Inf	0.00773807	0.047071	3.18331970323968	1.67053205521971	0.00781942	0.0454391	C2	29956671	29958119	-	711	-	GO:0016020;GO:0016021;GO:0016021;	-	-	-	-	-
Bo8g081830	2.2373667034814102	1.1618017328999	0.00786235	0.0476866	0.461185513074108	-1.11658089964356	0.000602079	0.00589779	C8	27903457	27904539	+	1083	-	GO:0008446;GO:0008446;GO:0019673;GO:0019673;	K01711	EC:4.2.1.47	-	106307368	A0A0D3DSH5
Bo2g093180	Inf	Inf	0.00787654	0.0477027	2.58142964272776	1.36817027775413	0.0422883	0.162444	C2	25634956	25635834	+	879	-	-	-	-	-	-	-
Bo5g030450	Inf	Inf	0.00787654	0.0477027	5.80713194566955	2.53782581434033	4.54678e-06	9.09355e-05	C5	10341561	10342672	+	1014	-	GO:0003676;GO:0003676;GO:0008270;GO:0008270;	-	-	-	-	-
Bo5g076490	Inf	Inf	0.00787654	0.0477027	2.98031641732236	1.57546550836134	0.0151836	0.075989	C5	25287725	25288466	-	405	-	GO:0005783;GO:0005783;GO:0005886;GO:0005886;GO:0010155;GO:0010155;GO:0016020;GO:0016021;GO:0016021;	-	-	-	-	-
Bo3g107650	2.7727062262934901	1.47129476808265	0.00790955	0.0478559	0.324060767819198	-1.62566372248422	0.000346079	0.00369704	C3	38121464	38122859	+	825	-	GO:0003677;GO:0003677;GO:0003677;GO:0005634;GO:0005634;GO:0006355;GO:0006355;	K16222	-	-	106331877	A0A0D3BFS9
Bo1g041870	2.13387597892764	1.0934763290276099	0.00791862	0.047903	0.22122618701346	-2.17640592433136	4.39047e-07	1.1411e-05	C1	12990090	12991628	-	1263	-	GO:0003824;GO:0003824;GO:0004721;GO:0004722;GO:0004722;GO:0006470;GO:0006470;GO:0016787;GO:0043169;GO:0043169;GO:0046872;GO:0046872;	K14497	EC:3.1.3.16	-	106311942	A0A0D3A6I0
Bo7g082390	5.2762019133376903	2.3994997756958001	0.00800748	0.0483248	2.28223992564447	1.19045046618508	0.00891586	0.0502946	C7	32461509	32463223	+	1230	-	-	K05396	EC:4.4.1.15	-	106303950	A0A0D3DAY1
Bo2g166030	2.25649474071668	1.1740834160195699	0.00801903	0.0483689	0.488449651381116	-1.03371823575683	0.00387665	0.0264382	C2	51886753	51887875	-	540	-	GO:0006869;GO:0006869;GO:0008289;GO:0008289;GO:0016020;GO:0016021;GO:0016021;	-	-	-	106324871	A0A0D3AYM3
Bo9g078120	2.6025474368241501	1.3799244598733	0.00804383	0.0484871	0.366253810740558	-1.44908432454591	1.23904e-05	0.000218895	C9	23825380	23827885	-	1524	-	GO:0004190;GO:0004190;GO:0004190;GO:0006508;GO:0006508;GO:0006508;GO:0006629;GO:0006629;GO:0008233;GO:0016787;	K08245	EC:3.4.23.40	-	106312989	A0A0D3E8A0
Bo6g121010	2.27964185304891	1.1888071851723101	0.00812344	0.0488878	0.391422384364683	-1.35320183282018	0.00225716	0.0173272	C6	38302735	38303936	-	696	-	-	-	-	-	-	-
Bo4g125340	2.2125277382135802	1.1456955422158901	0.00814663	0.0490036	2.40670785198703	1.26706102504048	9.61171e-05	0.00126399	C4	32319614	32321230	+	897	-	GO:0005739;GO:0005739;GO:0008168;GO:0008168;GO:0016740;GO:0032259;	-	-	-	-	-
Bo5g007920	8.6876066311644706	3.1189587803848702	0.00830723	0.0497845	4.74527213922805	2.24649082753225	1.53194e-06	3.49358e-05	C5	2594684	2596344	-	822	-	-	-	-	-	-	-
Bo5g004070	7.3879021385377603	2.88516475625249	0.00838489	0.0501772	0.36493455787073	-1.45429031993634	0.0344004	0.139982	C5	1034858	1038866	-	2334	-	GO:0005819;GO:0005819;GO:0005874;GO:0005874;GO:0032147;GO:0032147;GO:0060236;GO:0060236;	K16812	-	-	106343962	A0A0D3C7D8
Bo4g061500	3.32645835522829	1.7339869723697701	0.00840115	0.0502583	0.146162055112684	-2.77435927064215	6.21739e-07	1.55956e-05	C4	13875437	13876280	+	675	-	GO:0005515;	K00799	EC:2.5.1.18	-	106339988	A0A0D3BTU6
Bo2g092640	5.1130097251941198	2.3541727701038702	0.00844288	0.0504999	2.38152087745633	1.25188319605474	0.00472229	0.0308718	C2	25103034	25104512	+	561	-	-	-	-	-	-	-
Bo3g025320	3.1528618300801798	1.65666194724107	0.00846165	0.0505669	0.292715283474367	-1.77243002007669	0.000111171	0.00143472	C3	9601799	9603445	-	510	-	GO:0004601;GO:0004602;GO:0004602;GO:0006979;GO:0006979;GO:0016491;GO:0055114;GO:0055114;GO:0055114;GO:0098869;	K00432	EC:1.11.1.9	-	106334422	A0A0D3B4F3
Bo2g083780	2.2203117095968001	1.1507622307741201	0.00850559	0.0507608	0.299750371621228	-1.73816655263812	1.57423e-05	0.00026774	C2	23381264	23382878	-	1419	-	GO:0003677;GO:0003677;GO:0003677;GO:0005634;GO:0005634;GO:0006355;GO:0006355;	-	-	-	106327389	A0A0D3AQP4
Bo2g008640	2.73768840571526	1.45295825334866	0.00861936	0.0513245	0.415695339933293	-1.26640151986905	7.51361e-06	0.000140294	C2	1595403	1597820	+	1236	-	GO:0006520;GO:0006520;GO:0016491;GO:0016491;GO:0016491;GO:0016639;GO:0016639;GO:0055114;GO:0055114;GO:0055114;	K00261	EC:1.4.1.3	-	106321648	A0A0D3AI31
Bo7g088790	3.3668743601328899	1.75140988588336	0.00862445	0.0513466	22.4329851267058	4.48754970554533	1.51803e-09	6.54838e-08	C7	34237035	34239258	-	1497	-	GO:0004657;GO:0004657;GO:0006560;GO:0006562;GO:0006562;GO:0016491;GO:0055114;	K00318	EC:1.5.-.-	-	106307026	A0A0D3DBM5
Bo4g124170	4.2865711751611304	2.0998240984208798	0.00868902	0.0516649	2.25026564046623	1.17009531946989	0.00820938	0.0471123	C4	32173446	32174335	+	612	-	GO:0005777;GO:0005777;GO:0010468;GO:0010468;	-	-	-	106336621	A0A0D3BYG0
Bo9g122190	3.73211305921755	1.89999269130807	0.00890404	0.0526239	0.411457218230838	-1.28118566242967	0.0126898	0.0661739	C9	38856728	38857984	+	990	-	GO:0016020;GO:0016021;GO:0016021;	-	-	-	106313142	A0A0D3EBJ0
Bo2g082100	32.540062614168399	5.0241451219599798	0.00891421	0.0526757	3.16905884494688	1.66405444877816	0.00503911	0.0324321	C2	22799275	22801767	-	1884	-	-	-	-	-	-	-
Bo7g114790	2.5778498135688399	1.36616821423058	0.00894044	0.0528054	0.474126133260903	-1.07665718001999	0.00985943	0.0543868	C7	45642968	45647001	-	3231	-	GO:0006914;GO:0006914;	K08330	-	-	106305931	A0A0D3DH31
Bo3g011970	18.6757410790634	4.2230935871589903	0.00895331	0.0528486	2.58098229755944	1.36792024630953	0.0172886	0.0840276	C3	3939321	3940105	-	717	-	-	-	-	-	106334828	A0A0D3B1G5
Bo5g064330	2.09564588227768	1.0673949539729399	0.00896104	0.0528768	0.0920097287622475	-3.44206977539872	6.23969e-19	1.8521e-16	C5	20343999	20345582	+	1584	-	GO:0003824;GO:0003824;GO:0016491;GO:0016491;GO:0016614;GO:0016614;GO:0050660;GO:0050660;GO:0055114;GO:0055114;GO:0071949;	-	-	-	106343779	A0A0D3CEZ7
Bo3g149890	4.7848817906110401	2.25848328370695	0.00908091	0.0534739	11.1097516685622	3.4737546640412	5.56786e-08	1.78439e-06	C3	53514251	53516890	-	2640	-	GO:0004672;GO:0004672;GO:0005524;GO:0005524;GO:0006468;GO:0006468;GO:0016020;GO:0016021;GO:0016021;	-	-	-	106336070	A0A0D3BJD3
Bo9g175610	3.30144883980571	1.72309928970938	0.00910648	0.0536139	3.45180886557277	1.78735258145644	5.32399e-06	0.000104578	C9	52078034	52078654	+	621	-	GO:0003677;GO:0003677;GO:0003677;GO:0003700;GO:0003700;GO:0005634;GO:0005634;GO:0006351;GO:0006351;GO:0006355;GO:0006355;GO:0006355;	-	-	-	106313555	A0A0D3EH66
Bo1g150360	2.1088402104664499	1.0764497844151	0.00924015	0.0542375	0.41965957563438	-1.25270859482915	0.000255912	0.00289683	C1	42251271	42253673	+	534	-	-	-	-	-	-	-
Bo4g043670	3.8773696748773001	1.9550782905926301	0.00932827	0.054671	0.253185155323691	-1.98173527530563	0.0015905	0.0130564	C4	9681614	9682546	-	759	-	GO:0003677;GO:0003677;GO:0003677;GO:0005634;GO:0005634;GO:0006351;GO:0006351;GO:0006355;GO:0006355;GO:0006355;	-	-	-	106340246	A0A0D3BSF0
Bo4g019650	2.35644060244964	1.23660931656169	0.009351	0.0547783	0.487335548268856	-1.0370126323804	0.00594188	0.0368046	C4	2555365	2556832	+	909	-	GO:0000172;GO:0003723;GO:0003723;GO:0004526;GO:0004540;GO:0004540;GO:0005634;GO:0005655;GO:0005730;GO:0006364;GO:0006364;GO:0006364;GO:0006379;GO:0006396;GO:0006396;GO:0008033;GO:0008033;GO:0008033;GO:0030677;GO:0030677;GO:0030677;GO:0090501;GO:0090502;	K03538	EC:3.1.26.5	-	106339635	A0A0D3BPI4
Bo4g130860	4.6685018841179096	2.2229596653311501	0.00944911	0.05524	0.187388385376238	-2.4158965596031	0.000893266	0.00815094	C4	33762466	33763515	-	1050	-	GO:0003677;GO:0003677;GO:0003677;GO:0003700;GO:0003700;GO:0005634;GO:0005634;GO:0006351;GO:0006351;GO:0006355;GO:0006355;GO:0006355;	-	-	-	-	-
Bo3g010180	3.8630646911528901	1.9497458372447101	0.00951427	0.0555424	3.52741815650659	1.81861260966255	7.34409e-06	0.000137472	C3	3540048	3540903	+	321	-	-	-	-	-	106334749	A0A0D3B185
Bo2g166240	2.8502731234734999	1.51110017015503	0.0095165	0.0555468	0.274997379338372	-1.8625102247357	4.12951e-06	8.38001e-05	C2	52071332	52072762	-	1431	-	GO:0005515;	-	-	-	106322550	A0A0D3AYP4
Bo8g070020	4.2374455854324999	2.0831948422004301	0.00952851	0.0555836	0.192704889662274	-2.37553491608188	3.15327e-05	0.000488536	C8	22823011	22824400	+	1167	-	GO:0016020;GO:0016021;GO:0016021;	-	-	-	-	-
Bo1g022510	2.8526310767707401	1.51229317905119	0.00952934	0.0555836	0.145247201921021	-2.78341772343346	9.25645e-07	2.23493e-05	C1	8406096	8408200	+	1713	-	GO:0003824;GO:0003824;GO:0016491;GO:0016491;GO:0016614;GO:0016614;GO:0050660;GO:0050660;GO:0055114;GO:0055114;GO:0071949;	-	-	-	106308278	A0A0D3A4N1
Bo6g098590	3.0676200330981702	1.6171197962981001	0.00958997	0.0559055	2.2494412993511	1.16956671933304	0.0032028	0.0227123	C6	31018274	31018984	+	291	-	GO:0016020;GO:0016021;GO:0016021;	-	-	-	-	-
Bo4g195410	2.5010571782864601	1.3225380402807301	0.00969032	0.0564109	0.448747140030095	-1.15602535055345	0.00179201	0.0143761	C4	52868299	52870717	-	702	-	GO:0007275;GO:0007275;	-	-	-	106337607	A0A0D3C6C8
Bo3g093550	Inf	Inf	0.00982651	0.0570431	2.71875882328725	1.4429481778872	0.0346878	0.140906	C3	34090396	34092327	-	789	-	-	-	-	-	-	-
Bo4g034730	Inf	Inf	0.00982651	0.0570431	5.91767159812769	2.56502963622452	4.95092e-06	9.79705e-05	C4	7464745	7465131	+	387	-	-	-	-	-	-	-
Bo5g093030	Inf	Inf	0.00982651	0.0570431	3.49305003916997	1.80448730999452	0.00425786	0.028409	C5	30094517	30095544	+	735	-	-	-	-	-	-	-
Bo1g091730	13.6219875732068	3.76786531606438	0.0101472	0.0585847	3.29960321354887	1.72229254681569	0.00122227	0.0105402	C1	27211174	27218324	-	231	-	-	-	-	-	-	-
Bo1g019900	5.2351371622222604	2.3882273367101501	0.010171	0.0586948	4.33181895903823	2.11497294923534	7.98332e-07	1.95403e-05	C1	7140469	7141764	-	1296	-	GO:0005515;GO:0016020;GO:0016021;GO:0016021;	-	-	-	106305222	A0A0D3A469
Bo1g123160	2.5099403767848099	1.3276530936029201	0.0102135	0.0589036	0.29755519611406	-1.74877078352953	4.03269e-05	0.000606688	C1	36671924	36672887	-	732	-	GO:0003677;GO:0003677;GO:0003677;GO:0003700;GO:0003700;GO:0005634;GO:0005634;GO:0006351;GO:0006351;GO:0006355;GO:0006355;GO:0006355;	K09286	-	-	106311487	A0A0D3AD18
Bo5g109840	2.8384997328136898	1.50512860581276	0.0103264	0.0594532	0.261598821229814	-1.9345720548531	7.6915e-05	0.00104885	C5	34088919	34090995	-	1428	-	GO:0005615;GO:0005615;GO:0008289;GO:0008289;	-	-	-	-	-
Bo4g186640	4.9788768116493802	2.3158203204007202	0.0103302	0.059466	2.40710563001905	1.26729945239028	0.00373685	0.0256956	C4	49600837	49603046	+	1392	-	GO:0005635;GO:0005635;GO:0005874;GO:0005874;GO:0008017;GO:0008017;GO:0009524;GO:0009524;GO:0072686;GO:0072686;	-	-	-	-	-
Bo4g053680	3.7763381431115102	1.91698795313946	0.0106403	0.0608093	0.298777149762768	-1.74285827870301	0.00415628	0.0278733	C4	12286302	12287351	+	1050	-	GO:0003677;GO:0003677;GO:0005634;GO:0005634;GO:0006351;GO:0006351;GO:0006355;GO:0006355;GO:0009965;GO:0009965;GO:0030154;GO:0030154;GO:0045962;GO:0045962;GO:0048366;	-	-	-	106342905	A0A0D3BTA8
Bo8g054270	2.9586646970129298	1.5649462063775501	0.0106446	0.060812	0.429123516697834	-1.22053512949511	0.0056901	0.0356764	C8	17893763	17895811	+	2049	-	GO:0004672;GO:0004672;GO:0005524;GO:0005524;GO:0006468;GO:0006468;GO:0016020;GO:0016021;GO:0016021;GO:0030246;GO:0030246;GO:0030246;	-	-	-	106312701	A0A0D3DNA6
Bo7g113210	2.2967467770089698	1.1995918041726701	0.0107467	0.0612012	0.421650939148312	-1.245878927112	0.00568889	0.0356748	C7	44724354	44727509	+	2232	-	GO:0016020;GO:0016020;GO:0016491;GO:0016614;GO:0016614;GO:0046577;GO:0046577;GO:0046577;GO:0050660;GO:0050660;GO:0055114;GO:0055114;GO:0055114;	K17756	EC:1.1.3.20	-	106306420	A0A0D3DGM3
Bo8g055900	3.8722985792726599	1.95319019802273	0.0108035	0.0614589	0.226255250544434	-2.14397682270689	0.000321694	0.0034823	C8	18427199	18428110	-	912	-	GO:0005484;GO:0005484;GO:0005886;GO:0005886;GO:0006886;GO:0006886;GO:0009504;GO:0009504;GO:0009506;GO:0009506;GO:0009524;GO:0009524;GO:0012505;GO:0012505;GO:0016020;GO:0016020;GO:0016020;GO:0016021;GO:0016021;GO:0016192;GO:0016192;GO:0061025;	K08486	-	-	106309893	A0A0D3DNH0
Bo7g087520	2.0826036849193601	1.05838832367978	0.0108868	0.0618226	0.0711390046141433	-3.81321540160333	2.86242e-27	3.96498e-24	C7	33941975	33943103	-	798	-	GO:0007165;GO:0007165;	-	-	-	106301818	A0A0D3DBJ7
Bo9g009200	2.0149843424377001	1.0107686282444299	0.0108874	0.0618226	0.327246709081387	-1.61154941093941	2.1047e-06	4.64344e-05	C9	2449896	2450420	-	525	-	-	-	-	-	106316077	A0A0D3E0R5
Bo5g059710	2.12958645726708	1.09057330182462	0.0109221	0.0620005	0.412437730347269	-1.27775177649996	0.000445494	0.00458831	C5	18751448	18754643	-	2379	-	GO:0003676;GO:0003676;GO:0003723;GO:0003723;	-	-	-	106295132	A0A0D3CEI2
Bo8g067220	3.6999376465695	1.8875009578380799	0.0109619	0.0621697	0.368223062160598	-1.44134810800729	0.00774682	0.0451154	C8	21718467	21726557	+	3051	-	GO:0003677;GO:0003677;	-	-	-	-	-
Bo5g137790	3.1507636541100101	1.6557015386043401	0.0109922	0.0622658	2.67863001061912	1.42149532074433	0.000190495	0.00225101	C5	42998563	42999825	+	1263	-	GO:0005634;GO:0010629;GO:1900037;	-	-	-	106292493	A0A0D3CLJ3
Bo9g181450	5.0886700132185698	2.3472886393935699	0.0110822	0.0626704	0.264091506281476	-1.92089019263508	0.00382342	0.026161	C9	53594143	53596820	-	2121	-	GO:0004806;GO:0004806;GO:0006629;GO:0006629;GO:0006629;GO:0008152;GO:0008152;	-	-	-	-	-
Bo7g085690	2.1736599959178902	1.1201262915313199	0.0110953	0.0627258	0.491317206929257	-1.02527332879496	0.00393388	0.0267209	C7	33338582	33340175	+	1170	-	GO:0003830;GO:0003830;GO:0006487;GO:0006487;GO:0016020;GO:0016020;GO:0016020;GO:0016021;GO:0016021;	-	-	-	-	-
Bo6g097340	5.36582843202343	2.4238009263416198	0.0111578	0.063031	2.41808061512359	1.27386234264341	0.00778132	0.045274	C6	30800258	30801815	+	1173	-	GO:0005506;GO:0005506;GO:0016491;GO:0016491;GO:0016705;GO:0016705;GO:0031418;GO:0031418;GO:0046872;GO:0055114;GO:0055114;	-	-	-	106298408	A0A0D3CXX7
Bo6g122350	3.44319962393529	1.7837498254366799	0.0112323	0.0634183	0.220981959463762	-2.17799949927307	0.0119922	0.0633485	C6	39060377	39062002	-	1365	-	GO:0005618;GO:0005794;GO:0005794;GO:0005886;GO:0005886;GO:0009505;GO:0009505;GO:0009506;GO:0009506;GO:0009735;GO:0009735;GO:0048046;GO:0048046;	-	-	-	106300578	A0A0D3D1P0
Bo9g183300	8.5574555832230494	3.0971818990633202	0.0113392	0.0638716	0.0974496295199792	-3.35919948906021	0.000264057	0.00297283	C9	54139475	54141676	+	1107	-	GO:0016747;GO:0016747;	-	-	-	106316172	A0A0D3EI89
Bo5g025630	5.06229829788073	2.3397925213153798	0.0114927	0.0646581	0.448619728081453	-1.1564350304608	0.0451426	0.170453	C5	8905805	8908640	+	1608	-	GO:0005515;	-	-	-	106344040	A0A0D3CBA1
Bo7g078590	8.7341879110681404	3.1266735702124899	0.0117661	0.0658617	0.223454194708249	-2.16194896746039	0.0125047	0.0654365	C7	29871873	29872511	-	639	-	GO:0004857;GO:0004857;GO:0043086;	-	-	-	106304896	A0A0D3DA50
Bo3g001470	2.5085976817222799	1.32688111597447	0.0118845	0.066455	0.21561823789562	-2.21344888243351	7.67709e-07	1.88897e-05	C3	212364	214156	+	1299	-	GO:0016020;GO:0016021;GO:0016021;	-	-	-	106331973	A0A0D3AZB2
Bo8g051120	3.3388176597905899	1.73933730678859	0.0118903	0.0664728	0.489089986819721	-1.03182816632576	0.0421743	0.162109	C8	17070434	17071920	-	1257	-	GO:0003824;GO:0003824;GO:0004721;GO:0004722;GO:0004722;GO:0006470;GO:0006470;GO:0016787;GO:0043169;GO:0043169;GO:0046872;GO:0046872;	K14497	EC:3.1.3.16	-	106307446	A0A0D3DMY9
Bo2g092980	6.2120550019804996	2.6350706035071201	0.0120978	0.0674401	0.149462980800537	-2.74213989493855	0.000845638	0.00778986	C2	25421077	25424702	-	2724	-	GO:0006809;GO:0006809;GO:0016491;GO:0016491;GO:0016491;GO:0020037;GO:0020037;GO:0030151;GO:0030151;GO:0042128;GO:0042128;GO:0042128;GO:0043546;GO:0043546;GO:0046872;GO:0050464;GO:0050464;GO:0055114;GO:0055114;GO:0055114;	K10534	-	-	106327343	A0A0D3ARC1
Bo6g042620	2.12926423872304	1.0903549973431399	0.0121616	0.0677454	0.291554687558529	-1.77816157657466	1.1815e-08	4.31945e-07	C6	10681858	10685208	+	2079	-	GO:0000166;GO:0005524;GO:0005524;GO:0005524;GO:0009651;GO:0009651;GO:0009737;GO:0009737;GO:0010025;GO:0010025;GO:0016020;GO:0016020;GO:0016020;GO:0016021;GO:0016021;GO:0016887;GO:0016887;	-	-	-	106300438	A0A0D3CRM2
Bo1g048150	2.7579167797719899	1.4635789241391799	0.0122547	0.068111	2.07055129735095	1.05001494553178	0.0177221	0.085602	C1	13786938	13787321	-	384	-	GO:0005509;GO:0005509;GO:0080167;GO:0080167;	K16465	-	-	106312930	A0A0D3A6W3
Bo00534s160	3.03439789902637	1.60141027784376	0.0124016	0.0688039	0.455687863389444	-1.13388214798439	0.0263013	0.115009	Scaffold00534	187322	189405	+	2007	-	GO:0008460;GO:0008460;GO:0009225;GO:0009225;	K12450	EC:4.2.1.76	-	106319662	A0A0D2ZPP9
Bo1g014680	10.814951134131	3.4349552415828901	0.0125372	0.0693391	0.174229929930133	-2.5209356176052	0.0163621	0.080475	C1	4878310	4881897	+	2622	-	GO:0000166;GO:0004672;GO:0004672;GO:0004674;GO:0005515;GO:0005524;GO:0005524;GO:0005524;GO:0006468;GO:0006468;GO:0016020;GO:0016021;GO:0016021;GO:0016301;GO:0016310;GO:0016740;	-	-	-	-	-
Bo7g097790	2.7231763210836699	1.4452903974818101	0.0128913	0.0709872	2.1074843793439	1.07552193796375	0.0200809	0.09389	C7	38091545	38092270	-	726	-	GO:0003677;GO:0003677;GO:0005634;GO:0005634;GO:0006351;GO:0006351;GO:0006355;GO:0006355;	K16221	-	-	106305958	A0A0D3DDC8
Bo8g106400	4.8557850036007801	2.2797045457481402	0.0129376	0.0712044	0.0419718860451748	-4.57443289627011	1.99033e-07	5.5759e-06	C8	37590568	37591454	+	456	-	GO:0016020;GO:0016021;GO:0016021;	-	-	-	106312399	A0A0D3DX90
Bo4g176490	2.5062713482547201	1.32554262040149	0.012949	0.0712508	0.089551035015624	-3.48114608304335	2.88404e-09	1.18908e-07	C4	46887382	46888047	+	666	-	-	-	-	-	-	-
Bo9g174280	6.3267745763505596	2.6614701933911098	0.0129859	0.0713978	0.298642643289582	-1.74350791176629	0.0360324	0.145034	C9	51457184	51460074	-	1932	-	-	-	-	-	106318230	A0A0D3EGT3
Bo7g114350	2.0406107038755001	1.0290009794516399	0.0132743	0.0727244	0.463137908384123	-1.11048624672183	0.00125384	0.0107554	C7	45397402	45398498	+	396	-	-	-	-	-	-	-
Bo9g120810	Inf	Inf	0.0135325	0.0739008	0.127436811390318	-2.97214602028223	0.0198863	0.0932638	C9	38472109	38472702	-	411	-	-	-	-	-	-	-
Bo7g077410	2.24649150539513	1.16767360664324	0.0138665	0.0754744	0.306931635106256	-1.70401074442734	1.75979e-05	0.000295402	C7	29077389	29078312	+	924	-	GO:0003677;GO:0003677;GO:0003677;GO:0003700;GO:0003700;GO:0005634;GO:0005634;GO:0006351;GO:0006351;GO:0006355;GO:0006355;GO:0006355;	K09286	-	-	106303856	A0A0D3D9T2
Bo3g037340	2.3553885218527402	1.23596505233014	0.0139468	0.0758804	0.484303614862617	-1.04601632357098	0.014982	0.0752014	C3	14981744	14982131	+	285	-	-	-	-	-	106332316	A0A0D3B6Q9
Bo6g076360	30.4560633142302	4.9286575690803396	0.0140276	0.0762564	0.0587070436280522	-4.09032258256149	0.00184763	0.014718	C6	22294258	22295817	+	480	-	-	-	-	-	-	-
Bo1g040540	3.47783664867839	1.79819017195558	0.0140811	0.0764799	0.133027368417925	-2.91020500540989	7.77525e-05	0.0010559	C1	12682539	12683807	+	855	-	GO:0004553;GO:0004553;GO:0005576;GO:0005618;GO:0005618;GO:0005618;GO:0005975;GO:0005975;GO:0006073;GO:0006073;GO:0008152;GO:0010411;GO:0010411;GO:0016740;GO:0016762;GO:0016762;GO:0016762;GO:0016787;GO:0016798;GO:0042546;GO:0042546;GO:0048046;GO:0048046;GO:0048046;GO:0071555;GO:0071555;	K08235	EC:2.4.1.207	-	106295245	A0A0D3A6E6
Bo4g021250	2.0807958311969799	1.05713541400644	0.0142706	0.0773628	0.253109929633055	-1.98216398865818	9.43856e-08	2.85832e-06	C4	2892165	2892494	+	330	-	GO:0016020;GO:0016021;GO:0016021;GO:0046622;GO:0046622;	-	-	-	-	-
Bo9g102380	12.597076618177599	3.6550170637078301	0.0143251	0.0776243	0.319047921743743	-1.64815495845346	0.0461984	0.173406	C9	33109266	33112315	-	2133	-	GO:0000226;GO:0000226;GO:0000910;GO:0008017;GO:0008017;	K16732	-	-	106313570	A0A0D3EA44
Bo2g009250	2.5045111734838001	1.32452904796783	0.0143862	0.0778874	0.444278817793678	-1.17046273632699	0.00844711	0.0481956	C2	1857124	1858286	-	960	-	GO:0003677;GO:0003677;GO:0003677;GO:0005634;GO:0005634;GO:0006351;GO:0006351;GO:0006355;GO:0006355;GO:0006355;	-	-	-	-	-
Bo02098s010	3.2980772045361699	1.7216251711519099	0.0145032	0.0783837	0.215660855117045	-2.21316376008372	0.000608843	0.00595625	Scaffold02098	3	2378	-	1404	-	GO:0003676;GO:0003676;GO:0003723;GO:0003723;	-	-	-	-	-
Bo3g039850	2.3226056595267601	1.21574422890415	0.0145957	0.0787925	0.414540792928898	-1.2704140176284	0.00370048	0.025483	C3	16051284	16051709	+	426	-	-	-	-	-	106333159	A0A0D3B761
Bo7g109520	3.0681470985255799	1.61736765273199	0.0146422	0.0789976	0.240813314118793	-2.05401293666785	0.00305474	0.0218906	C7	43363242	43363511	+	270	-	-	-	-	-	-	-
Bo6g091520	2.86227465960101	1.51716211756839	0.014767	0.0795785	0.471203483506365	-1.08557789014433	0.0469848	0.175565	C6	28383889	28384245	+	357	-	GO:0009733;GO:0009733;	-	-	-	106298395	A0A0D3CX42
Bo4g188020	3.2452621630570002	1.6983350286296	0.0147999	0.0797233	0.22110150905224	-2.17721922308124	0.000558745	0.00555773	C4	50456250	50458406	-	1767	-	GO:0016020;GO:0016021;GO:0016021;GO:0016021;GO:0055085;GO:0055085;	-	-	-	106339844	A0A0D3C536
Bo1g006240	7.2479796330709698	2.8575789013956299	0.0148895	0.079984	0.0842906006148922	-3.56848442696239	0.000137178	0.00170391	C1	1860184	1860644	-	219	-	GO:0006979;GO:0007568;GO:0009507;GO:0009611;GO:0009753;	-	-	-	106293021	-
Bo4g044200	3.0109563944995599	1.59022181470664	0.0149723	0.0803698	46.686199026962	5.54492423073298	1.46007e-13	1.42576e-11	C4	10166852	10170762	+	3108	-	GO:0016020;GO:0016020;GO:0016020;GO:0016021;GO:0016021;GO:0016740;GO:0016757;GO:0016760;GO:0016760;GO:0030244;GO:0030244;GO:0071555;GO:0071555;	K20924	EC:2.4.1.-	-	106342336	A0A0D3BSK3
Bo4g072030	16.920468004744901	4.0806975675288504	0.0149732	0.0803698	3.17569018275719	1.66707017142226	0.0037102	0.0255405	C4	15619405	15621609	-	1641	-	GO:0005524;GO:0005524;GO:0005737;GO:0005737;GO:0006457;GO:0006457;GO:0042026;GO:0042026;	-	-	-	-	-
Bo8g101690	2.0789035882759199	1.0558228529815299	0.0153265	0.0817649	0.279973926477958	-1.83663561733305	7.93532e-07	1.94356e-05	C8	35747641	35749494	+	1035	-	-	-	-	-	106309750	-
Bo1g105150	10.586855188348499	3.4042021971578298	0.0154241	0.082173	2.41715828635984	1.27331195033529	0.0189306	0.0899256	C1	32013375	32014952	-	315	-	-	-	-	-	-	-
Bo6g098550	2.6757963302909098	1.4199683086319701	0.0154721	0.082376	2.65980378733414	1.41131982261334	0.000144767	0.00178866	C6	30990146	30991455	-	360	-	-	-	-	-	-	-
Bo3g171080	16.724232189080201	4.0638680730226397	0.0155205	0.0825663	4.0441370181965	2.01583187758808	0.00316132	0.0225163	C3	60400654	60402354	-	975	-	GO:0000166;GO:0004672;GO:0004672;GO:0004674;GO:0004674;GO:0005524;GO:0005524;GO:0005524;GO:0006468;GO:0006468;GO:0007049;GO:0007049;	-	-	-	-	-
Bo3g127530	5.6591296920697296	2.5005802004992899	0.015684	0.0832902	40.2772703020882	5.33189400625872	7.88177e-10	3.54301e-08	C3	46635612	46638130	+	1461	-	GO:0003824;GO:0003824;GO:0004553;GO:0004553;GO:0005975;GO:0005975;GO:0016020;GO:0016021;GO:0016021;	K01179	EC:3.2.1.4	-	106332851	A0A0D3BH82
Bo3g039590	2.3740974813498301	1.2473791738057101	0.0157647	0.083671	0.239245286481036	-2.06343759332098	2.41143e-06	5.21314e-05	C3	15898979	15899368	-	390	-	GO:0046983;	-	-	-	106333614	A0A0D3B735
Bo9g165800	2.3782960617831699	1.2499283199111	0.0157879	0.0837697	2.34801950773119	1.23144439464478	0.000675985	0.00649128	C9	48977967	48980535	+	1101	-	GO:0008375;GO:0008375;GO:0016020;GO:0016020;	-	-	-	106318666	A0A0D3EFI1
Bo8g091210	2.4954818599153699	1.3193184166804099	0.0161286	0.0851891	0.441839465409073	-1.17840580791198	0.00576906	0.0360265	C8	30797052	30797905	-	477	-	GO:0030001;GO:0030001;GO:0046872;GO:0046872;GO:0046872;	-	-	-	106310860	A0A0D3DTR8
Bo8g097690	2.5349636324460798	1.34196504992445	0.0161504	0.0852555	75.5628737911273	6.23960566592766	7.61087e-16	1.28799e-13	C8	33335143	33337054	-	1755	-	GO:0004857;GO:0004857;GO:0005576;GO:0005576;GO:0005618;GO:0005618;GO:0005618;GO:0016020;GO:0016021;GO:0016021;GO:0016787;GO:0030599;GO:0030599;GO:0030599;GO:0042545;GO:0042545;GO:0042545;GO:0043086;GO:0045330;GO:0045330;GO:0045490;GO:0045490;GO:0071555;	-	-	-	106311462	A0A0D3DV18
Bo4g035000	3.3852049996517	1.7592432024932401	0.0161856	0.0853808	2.19198279683877	1.13223647575611	0.00949422	0.0527676	C4	7630477	7631377	-	453	-	GO:0003735;GO:0003735;GO:0005840;GO:0005840;GO:0005840;GO:0006412;GO:0006412;GO:0030529;	K02955	-	-	106339768	A0A0D3CL56
Bo9g010710	16.4448847069593	4.03956698854069	0.0162708	0.0857578	0.24080216937885	-2.05407970553887	0.0490445	0.180923	C9	3273378	3276631	-	1398	-	GO:0005516;GO:0005516;GO:0006950;GO:0006950;	-	-	-	-	-
Bo3g022850	12.4412530595765	3.6370598932011902	0.0163462	0.0861307	6.65081550906893	2.73353125170476	0.0199371	0.0934161	C3	8040871	8042917	+	1062	-	GO:0046983;GO:0046983;	K20558	-	-	106332511	A0A0D3B3Q6
Bo1g019680	3.6083100921590301	1.85132332672978	0.0164479	0.0865805	0.186772733205415	-2.42064424230566	0.000222264	0.00257256	C1	7005532	7008040	-	1308	-	GO:0006629;GO:0006629;GO:0008970;GO:0008970;GO:0016787;	-	-	-	106345019	A0A0D3A447
Bo8g076890	2.5800467253878199	1.3673971935070099	0.0165809	0.0871208	0.349887043297311	-1.51503885390724	0.00212084	0.0164495	C8	24997107	24998818	-	1212	-	GO:0016020;GO:0016021;GO:0016021;	-	-	-	106312690	A0A0D3DRD0
Bo8g048320	2.6797578520834202	1.4221026419585301	0.016889	0.0883775	4.29214535186506	2.10169893323893	6.43729e-09	2.48713e-07	C8	15749652	15753321	+	912	-	-	-	-	-	-	-
Bo3g022580	Inf	Inf	0.0169019	0.0884203	3.5728362453133	1.83706979204008	0.00888735	0.0501641	C3	7841469	7844832	-	2220	-	GO:0016020;GO:0016021;GO:0016021;GO:0055085;GO:0055085;	-	-	-	106333220	A0A0D3B3M9
Bo9g134880	Inf	Inf	0.0170302	0.088929	3.76349542181997	1.91207321647378	0.000564837	0.00560621	C9	41236247	41238442	+	1107	-	GO:0000166;GO:0005524;GO:0005524;GO:0005524;GO:0016021;GO:0016021;GO:0016887;GO:0016887;	-	-	-	-	-
Bo1g152220	2.5598478884423699	1.3560580847917501	0.0171374	0.0893884	0.26021032141812	-1.94224990622363	0.000277936	0.00309645	C1	42766799	42768240	+	1068	-	GO:0003677;GO:0003677;GO:0003677;GO:0005634;GO:0005634;GO:0006351;GO:0006351;GO:0006355;GO:0006355;GO:0006355;	-	-	-	106345015	A0A0D3AFP4
Bo9g008970	Inf	Inf	0.0172007	0.0896055	2.83200788362815	1.50182528154217	0.0270504	0.117433	C9	2313232	2316887	-	2589	-	-	K14972	-	-	106316146	A0A0D3E0P2
Bo3g185540	2.4273625749309602	1.27938961981427	0.0175553	0.09101	3.27738338707926	1.71254444867725	2.47658e-06	5.33242e-05	C3	64803229	64804838	-	366	-	-	-	-	-	-	-
Bo9g058240	2.50572913255417	1.32523046883314	0.0175559	0.09101	0.409741929063044	-1.28721256292785	0.00303546	0.0217936	C9	16829523	16831411	-	1374	-	GO:0016020;GO:0016021;GO:0016021;	K01113	EC:3.1.3.1	-	106316132	A0A0D3E600
Bo9g072760	2.2828969047851899	1.19086570918438	0.0175927	0.091161	0.193330956148175	-2.37085543454585	6.57649e-09	2.52786e-07	C9	21809322	21809979	+	456	-	GO:0006952;GO:0006952;GO:0009607;GO:0009607;	-	-	-	106316379	A0A0D3E7L1
Bo3g064860	2.0477830677794899	1.03406289130702	0.0179059	0.0922589	0.489822724222771	-1.02966838884375	0.00569343	0.0356853	C3	24905318	24910451	-	3240	-	GO:0005634;GO:0005634;GO:0006351;GO:0006351;GO:0006357;GO:0006357;GO:0007049;GO:0007049;GO:0016020;GO:0016021;GO:0016021;GO:0051726;GO:0051726;	-	-	-	-	-
Bo9g064200	3.62636886627857	1.8585256803178101	0.0181408	0.0931082	0.376819149624348	-1.40805581155535	0.0129713	0.0673598	C9	19351974	19353350	-	1305	-	GO:0005267;GO:0005267;GO:0006811;GO:0016020;GO:0016020;GO:0016020;GO:0016021;GO:0016021;GO:0071805;GO:0071805;	K05389	-	-	106316508	A0A0D3E6U9
Bo4g165500	2.3594472181704602	1.23844889813911	0.0182755	0.0936832	4.01342518003518	2.00483400252588	6.29301e-07	1.57641e-05	C4	44639176	44639409	+	234	-	-	-	-	-	106339650	A0A0D3C2M0
Bo9g042120	Inf	Inf	0.0184679	0.0945263	3.84805764919049	1.94413041282371	0.00283905	0.0206778	C9	13703873	13705759	-	366	-	-	-	-	-	-	-
Bo1g005990	2.7907589107983499	1.4806574976684299	0.0186216	0.0951693	2.27434835804016	1.18545324628196	0.000993048	0.00891502	C1	1699655	1700143	+	489	-	-	-	-	-	106308614	A0A0D3A1M3
Bo3g037110	9.9079076895797797	3.30858042728372	0.0188227	0.0959169	0.157367551581386	-2.66779000003059	0.00481712	0.0313159	C3	14858436	14859343	+	636	-	GO:0016020;GO:0016021;GO:0016021;GO:0046622;GO:0046622;	-	-	-	-	-
Bo9g020280	2.0862691108472	1.0609252651652099	0.0190195	0.0967377	0.489963704256967	-1.02925321428797	0.00556043	0.0350691	C9	6266025	6269152	-	2241	-	GO:0004842;GO:0004842;GO:0005488;GO:0005515;GO:0016567;GO:0016567;GO:0016567;GO:0016740;	-	-	-	106318504	A0A0D3E2H8
Bo2g047970	3.4560519368177398	1.7891248981803101	0.0190427	0.0968001	0.0529980450376982	-4.23791704644674	1.40724e-10	7.47598e-09	C2	13469539	13472155	-	1728	-	GO:0006950;GO:0006950;GO:0009737;GO:0009737;	-	-	-	106323054	A0A0D3AMT7
Bo4g030280	2.0049697623781602	1.00358047907619	0.0190737	0.096934	2.32794303377696	1.21905575502754	0.0163675	0.080475	C4	6472597	6473187	+	516	-	GO:0005634;GO:0005737;GO:0005737;GO:0009416;GO:0009639;GO:0009639;GO:0009639;GO:0009640;GO:0009640;GO:0009646;GO:0009646;GO:0010029;GO:0010029;GO:0010114;GO:0010114;GO:0010218;GO:0010218;GO:0016604;GO:0016604;GO:0031048;GO:0031048;GO:0042803;GO:0042803;GO:0045893;GO:0045893;GO:0051457;GO:0051457;GO:1901000;GO:1901000;	-	-	-	-	-
Bo9g022050	2.41518110875321	1.2721313774268099	0.0193855	0.0981619	0.097706261270895	-3.35540517297481	9.20994e-07	2.22865e-05	C9	6738863	6739495	-	540	-	GO:0006950;GO:0006950;GO:0009415;GO:0009415;	-	-	-	106315749	A0A0D3E2Q6
Bo4g043520	30.4769084291142	4.9296446584732401	0.0196519	0.0991949	3.81542720496321	1.93184460148345	0.00401062	0.0271242	C4	9583327	9586033	+	1317	-	GO:0006508;GO:0006508;GO:0006508;GO:0008233;GO:0008234;GO:0008234;GO:0008234;GO:0016787;	-	-	-	-	-
Bo1g049650	6.9354300421475497	2.79398534187666	0.0197538	0.0996417	0.269182580464889	-1.89334304262877	0.0209411	0.0969185	C1	14154206	14161321	+	1866	-	GO:0004190;GO:0004190;GO:0006508;GO:0006508;	-	-	-	-	-
Bo7g111980	2.3825725786060001	1.25252016259276	0.019958	0.100468	2.27765457562886	1.18754896749638	0.016153	0.0796823	C7	44559086	44559349	-	264	-	-	-	-	-	106306116	A0A0D3DGJ9
Bo4g125870	2.3267872106538201	1.21833927942762	0.020763	0.103623	4.52181229184289	2.17690110459539	4.53731e-10	2.16725e-08	C4	32817205	32820062	-	1587	-	GO:0004672;GO:0004672;GO:0005509;GO:0005509;GO:0005524;GO:0005524;GO:0006468;GO:0006468;	K13412	EC:2.7.11.1	-	106342686	A0A0D3BYN1
Bo5g052250	2.31119183122104	1.20863700989881	0.021342	0.105803	2.24708072481976	1.16805195326959	0.000834625	0.00770575	C5	17417695	17420693	+	1566	-	GO:0000166;GO:0005524;GO:0005524;GO:0005978;GO:0005978;GO:0008878;GO:0008878;GO:0008878;GO:0009058;GO:0009058;GO:0009507;GO:0009507;GO:0009536;GO:0016740;GO:0016779;GO:0016779;GO:0016779;GO:0019252;GO:0019252;	-	-	-	-	-
Bo2g006920	Inf	Inf	0.0218808	0.107971	0	-Inf	0.000950923	0.00857388	C2	1122575	1124184	+	711	-	GO:0005576;GO:0005576;GO:0005576;GO:0005618;GO:0005618;GO:0009664;GO:0009664;GO:0016020;GO:0016020;	-	-	-	106326206	A0A0D3AHV8
Bo2g051350	6.7199244199533501	2.7484450068772999	0.0222132	0.109321	0.259922107758015	-1.94384874697026	0.0153814	0.0767123	C2	14745585	14747341	+	528	-	-	K16223	-	-	106326016	A0A0D3AN77
Bo7g017500	2.8790332800878402	1.5255844657822699	0.0222864	0.109551	0.380045435792764	-1.39575618666173	0.00530579	0.0338225	C7	6563009	6564185	-	1014	-	-	-	-	-	106303651	A0A0D3D3Q2
Bo1g022350	2.7500041437340101	1.45943379250639	0.0223416	0.109765	0.203183043733266	-2.29914808521157	1.43419e-05	0.000247525	C1	8322261	8326005	+	1794	-	GO:0000166;GO:0003883;GO:0003883;GO:0003883;GO:0005524;GO:0005524;GO:0006221;GO:0006221;GO:0006221;GO:0006241;GO:0006241;GO:0006541;GO:0006541;GO:0016874;GO:0044210;GO:0044210;	K01937	EC:6.3.4.2	-	106315431	A0A0D3A4L5
Bo1g134960	2.0323019325024898	1.0231147545534101	0.0224539	0.110229	0.451015166439329	-1.14875214659759	0.0055168	0.0348645	C1	38989633	38990181	+	549	-	GO:0016020;GO:0016021;GO:0016021;	K20359	-	-	106342620	A0A0D3ADV7
Bo7g098530	2.54172740298285	1.3458093114392	0.0225781	0.110678	0.291772449164606	-1.77708443277662	0.000207884	0.00242662	C7	38544355	38545329	-	975	-	GO:0016020;GO:0016021;GO:0016021;	-	-	-	106303768	A0A0D3DDK2
Bo2g132480	2.12233795697732	1.0856544065040401	0.0229419	0.112077	0.380725329032233	-1.39317754165747	6.16416e-05	0.000869739	C2	41467465	41468714	-	1167	-	GO:0005215;GO:0005215;GO:0006814;GO:0006814;GO:0016020;GO:0016020;GO:0016020;GO:0016021;GO:0016021;GO:0055085;GO:0055085;	-	-	-	-	-
Bo4g140250	2.1485008189789601	1.1033303270474599	0.0232569	0.113348	0.489509959939686	-1.03058988059586	0.0379754	0.150432	C4	37684171	37685618	-	1368	-	-	-	-	-	-	-
Bo2g012830	Inf	Inf	0.0234665	0.11422	0.0145071492300414	-6.10709214354399	0.0132478	0.0684629	C2	3822759	3824616	-	1422	-	-	-	-	-	-	-
Bo1g013190	2.2704170759536102	1.1829573451545801	0.023849	0.115617	0.242293782731116	-2.04517070923994	4.75839e-05	0.000698719	C1	4491858	4493282	-	1425	-	GO:0016020;GO:0016021;GO:0016021;	-	-	-	106300826	A0A0D3A345
Bo3g021820	3.1775173192308799	1.6678999887394099	0.0239812	0.116118	3.93614776287626	1.97678438042498	2.55813e-07	7.03685e-06	C3	7393133	7393651	-	519	-	-	-	-	-	-	-
Bo5g148420	2.3637539640554399	1.2410798776010901	0.0241015	0.116534	0.253690648560629	-1.97885775453107	0.00292429	0.0211462	C5	45770445	45771932	+	876	-	GO:0003677;GO:0003677;GO:0003677;GO:0005634;GO:0005634;GO:0006351;GO:0006351;GO:0006355;GO:0006355;GO:0006355;	-	-	-	-	-
Bo6g014360	5.2534150482416404	2.3932555697173701	0.0243531	0.117582	5.88335853740419	2.55663995812331	1.24452e-07	3.67364e-06	C6	2916479	2920059	+	1380	-	GO:0003677;GO:0003677;GO:0046983;GO:0046983;	-	-	-	-	-
Bo5g148460	3.4888077554850501	1.8027341025911401	0.0249423	0.119903	0.12714492428346	-2.97545422513023	2.13169e-08	7.44399e-07	C5	45797587	45800072	+	1479	-	GO:0004553;GO:0004553;GO:0005975;GO:0005975;GO:0008152;GO:0016787;GO:0016798;	-	-	-	106293331	A0A0D3CMW6
Bo3g039870	2.9668939156843299	1.56895334270889	0.0250158	0.120163	0.254918202233529	-1.9718937033457	0.00568497	0.035667	C3	16055734	16061791	-	4266	-	GO:0000166;GO:0005524;GO:0005524;GO:0005524;GO:0016020;GO:0016020;GO:0016020;GO:0016021;GO:0016021;GO:0016887;GO:0016887;	-	-	-	106328804	A0A0D3B763
Bo9g163280	3.1398871184267598	1.65071269395345	0.0251504	0.120665	0.120420151207227	-3.05385126081194	4.58112e-05	0.000677978	C9	47997322	47997753	+	432	-	GO:0005515;GO:0007165;GO:0007165;	-	-	-	-	-
Bo3g014010	2.9724847810531698	1.57166942347629	0.025199	0.12082	3.11217539351812	1.63792336888078	9.07964e-05	0.00120461	C3	4957096	4959038	-	639	-	GO:0007017;GO:0007017;GO:0030286;GO:0030286;	K10418	-	-	106332290	A0A0D3B219
Bo3g042650	26.549308713100999	4.7306023917297901	0.0253318	0.121269	2.6936489026332	1.42956181834308	0.0276361	0.119449	C3	17639897	17642167	+	1374	-	GO:0016020;GO:0016021;GO:0016021;GO:0016740;GO:0016746;GO:0019706;GO:0019706;	-	-	-	-	-
Bo3g032510	Inf	Inf	0.0255012	0.121643	3.04406811531511	1.60600064153786	0.0199175	0.0933593	C3	12480257	12480710	-	369	-	GO:0005886;GO:0005886;GO:0016020;GO:0016021;GO:0016021;	-	-	-	-	-
Bo2g032890	3.0767475179832098	1.62140605904399	0.0256059	0.121985	2.14609378789463	1.10171312566287	0.0175495	0.0849646	C2	9681701	9684664	+	1557	-	GO:0003824;GO:0003824;GO:0009690;GO:0009690;GO:0016491;GO:0016491;GO:0016614;GO:0016614;GO:0019139;GO:0019139;GO:0050660;GO:0050660;GO:0055114;GO:0055114;GO:0071949;	K00279	EC:1.5.99.12	-	106324800	A0A0D3ALL8
Bo1g078780	7.0037000541937102	2.8081172991350698	0.0256404	0.122103	0.162181080927028	-2.62432256167433	0.00544901	0.0345236	C1	23279837	23281166	+	1062	-	GO:0004857;GO:0004857;GO:0005618;GO:0005618;GO:0016020;GO:0016021;GO:0016021;GO:0016787;GO:0030599;GO:0030599;GO:0042545;GO:0042545;GO:0043086;GO:0045330;GO:0045330;GO:0045490;GO:0045490;	-	-	-	-	-
Bo4g038420	4.6673000153294	2.2225882071170102	0.025966	0.123282	0.376186198756944	-1.41048117359178	0.0344834	0.140198	C4	8133102	8133477	-	305	-	GO:0006388;GO:0006388;GO:0016772;GO:0016772;	-	-	-	-	-
Bo2g149870	2.3727998836584399	1.24659043216791	0.0263058	0.124586	0.173682167724679	-2.5254784574529	7.96889e-08	2.45096e-06	C2	47164935	47167168	-	1878	-	GO:0000166;GO:0004672;GO:0004672;GO:0005524;GO:0005524;GO:0005524;GO:0006468;GO:0006468;GO:0016020;GO:0016021;GO:0016021;	-	-	-	106327440	A0A0D3AWU7
Bo2g024860	Inf	Inf	0.02641	0.124992	3.2500592388017	1.7004660143708	0.0135456	0.0696367	C2	7230000	7233257	+	1821	-	GO:0003677;GO:0003677;GO:0003677;GO:0005634;GO:0005634;GO:0005634;GO:0006351;GO:0006351;GO:0006355;GO:0006355;GO:0006355;GO:0009725;GO:0009725;GO:0009734;GO:0009734;	-	-	-	-	-
Bo9g036870	2.0264384034048999	1.01894632319977	0.0264181	0.124992	0.357730094060483	-1.48305660466281	2.24641e-05	0.000361981	C9	12403348	12403962	+	615	-	GO:0004857;GO:0004857;GO:0043086;	-	-	-	-	-
Bo3g065530	2.08632051247604	1.0609608099379799	0.026511	0.125303	67.9547890814113	6.08650332270911	1.37034e-13	1.34516e-11	C3	25300659	25303285	+	1656	-	GO:0005507;GO:0005507;GO:0016491;GO:0016491;GO:0055114;GO:0055114;	K00423	EC:1.10.3.3	-	106335419	A0A0D3BB41
Bo00615s100	5.1814654420588298	2.3733601842036598	0.0267046	0.126012	0.173459407999152	-2.52733000401438	0.0016374	0.0133826	Scaffold00615	73722	75204	+	846	-	GO:0046983;GO:0046983;	-	-	-	106319775	A0A0D2ZQ38
Bo5g048460	7.1425961240061397	2.8364485468695699	0.0267118	0.126012	2.47875405822959	1.3096151344442	0.0195214	0.0920448	C5	15580036	15581676	-	567	-	GO:0003676;GO:0003676;GO:0005524;GO:0005524;	-	-	-	-	-
Bo3g088580	2.0573213536106199	1.04076716044047	0.0273355	0.128466	0.0361940129535342	-4.78810511668151	6.8555e-14	7.43176e-12	C3	32501581	32503155	-	1575	-	-	-	-	-	106328937	A0A0D3BDR0
Bo3g167210	8.36458445086277	3.0642938695438402	0.0275054	0.129085	0.0934033068560097	-3.42038256167798	0.00497554	0.0321139	C3	59027253	59029363	+	1479	-	GO:0004096;GO:0004096;GO:0004096;GO:0004601;GO:0006979;GO:0006979;GO:0016491;GO:0020037;GO:0020037;GO:0042744;GO:0042744;GO:0046872;GO:0046872;GO:0055114;GO:0055114;GO:0055114;GO:0098869;	K03781	EC:1.11.1.6	-	106335797	A0A0D3BL76
Bo5g051940	2.1486133096800701	1.1034058613580799	0.0276235	0.129557	0.48974859412261	-1.02988674380389	0.000594093	0.00583944	C5	17165126	17165979	+	207	-	GO:0005783;GO:0005783;GO:0016020;GO:0016021;GO:0016021;	-	-	-	-	-
Bo1g037200	4.4779424512058297	2.1628359873478402	0.02772	0.129944	0.419041285924923	-1.25483570283664	0.0302736	0.127547	C1	11169563	11172479	-	1335	-	GO:0004650;GO:0004650;GO:0005576;GO:0005576;GO:0005975;GO:0005975;GO:0008152;GO:0016787;GO:0016798;GO:0071555;GO:0071555;	-	-	-	106306943	A0A0D3A5R1
Bo3g019610	6.46309700149303	2.69222564448956	0.0278111	0.130256	0.137337049809566	-2.86420721691884	0.00163209	0.013345	C3	6771586	6773237	+	1155	-	GO:0003700;GO:0003700;GO:0006355;GO:0006355;GO:0008270;GO:0008270;GO:0043565;GO:0043565;GO:0046872;	-	-	-	106328064	A0A0D3B331
Bo9g014460	Inf	Inf	0.0278569	0.130373	5.6133487462404	2.48886169386993	0.00432582	0.028767	C9	4358136	4358911	-	471	-	-	-	-	-	-	-
Bo1g007860	2.1333028520616	1.0930887908788001	0.0280186	0.130932	0.324566157335809	-1.62341551764225	8.82113e-05	0.00117322	C1	2734888	2737334	+	1143	-	GO:0000166;GO:0000287;GO:0000287;GO:0005524;GO:0005524;GO:0005524;GO:0005622;GO:0005622;GO:0016301;GO:0016310;GO:0016740;GO:0032957;GO:0032957;GO:0046872;GO:0047325;GO:0047325;GO:0047325;GO:0052725;GO:0052725;GO:0052726;GO:0052726;	K00913	-	-	106324602	A0A0D3A260
Bo1g010540	3.2020779393350298	1.67900842382034	0.0283509	0.132235	0.443011016456489	-1.17458551983273	0.0347642	0.141063	C1	3591454	3597050	-	3516	-	GO:0005524;GO:0005524;GO:0016020;GO:0016021;GO:0016021;	-	-	-	-	-
Bo3g048360	Inf	Inf	0.028363	0.132275	0.151464047586103	-2.72295270729239	0.0440978	0.167583	C3	19778904	19780122	+	825	-	GO:0016788;GO:0016788;	-	-	-	-	-
Bo8g095730	2.1239063491958499	1.0867201538400799	0.0293061	0.135704	0.409031865972902	-1.28971485296666	0.000103969	0.00135486	C8	32783409	32784044	-	636	-	-	-	-	-	106309709	A0A0D3DUS1
Bo2g166480	Inf	Inf	0.0294128	0.136131	0.0620248836771583	-4.01100906531674	0.0114538	0.0612047	C2	52240736	52241023	+	288	-	GO:0045087;GO:0045087;	-	-	-	106326415	A0A0D3AYR8
Bo1g020060	2.4479446409511398	1.2915709325696501	0.0294447	0.136227	0.137599898583681	-2.86144868816766	8.47204e-08	2.59716e-06	C1	7259654	7260838	+	738	-	-	-	-	-	106305318	-
Bo6g081510	2.2411667773017099	1.16425001155843	0.0294842	0.136359	0.0551800154858789	-4.17971032820138	6.70703e-09	2.57275e-07	C6	25282591	25283967	+	1377	-	GO:0048046;GO:0048046;	-	-	-	106296532	A0A0D3CVY5
Bo9g058370	6.5530519651512504	2.71216697222382	0.0299326	0.138022	0.0818233191353286	-3.61134412892428	0.00216829	0.0167619	C9	16940659	16942215	+	825	-	GO:0016020;GO:0016021;GO:0016021;	-	-	-	106317017	A0A0D3E613
Bo2g164250	2.5986994600409199	1.3777897955723999	0.0303089	0.139256	7.8738705818682	2.97707299997074	3.13346e-06	6.58378e-05	C2	51322390	51323322	+	453	-	GO:0000166;GO:0004842;GO:0004842;GO:0005524;GO:0005524;GO:0006511;GO:0006511;GO:0016567;GO:0016740;	K10573	EC:2.3.2.23	-	106325232	A0A0D3AYE4
Bo2g007370	3.1850069020696798	1.6712964988774599	0.0304885	0.139788	0.452715925439339	-1.14332203692489	0.0411188	0.159404	C2	1432911	1434631	-	1176	-	GO:0003824;GO:0003824;GO:0004721;GO:0004722;GO:0004722;GO:0006470;GO:0006470;GO:0016787;GO:0043169;GO:0043169;GO:0046872;GO:0046872;	K01102	EC:3.1.3.43	-	106322767	A0A0D3AI03
Bo2g015440	2.0489391961469101	1.03487717189484	0.0305903	0.140113	0.274226965720789	-1.8665576514185	1.71908e-10	9.01734e-09	C2	4785375	4786794	-	1014	-	GO:0003677;GO:0003677;GO:0003677;GO:0005634;GO:0005634;GO:0006351;GO:0006351;GO:0006355;GO:0006355;GO:0006355;	-	-	-	106323242	A0A0D3AJR2
Bo4g010400	3.79009035931827	1.9222322440128301	0.0306265	0.140231	0.405098748496999	-1.30365446688588	0.0480161	0.178279	C4	1142679	1143548	-	780	-	GO:0016020;GO:0016021;GO:0016021;	-	-	-	106340650	A0A0D3BNV2
Bo2g146160	2.6032386019453	1.38030754918629	0.0307224	0.140566	0.337971452938693	-1.5650267017618	0.0035112	0.0244861	C2	45813503	45814119	+	444	-	GO:0016020;GO:0016020;GO:0016020;GO:0016021;GO:0016021;GO:0016021;GO:0022857;GO:0022857;GO:0055085;	-	-	-	-	-
Bo7g011620	2.2409244468585601	1.1640940089643601	0.0309649	0.141519	5.25332073980558	2.39322967046269	0.00126551	0.0108207	C7	4097092	4101199	-	2874	-	GO:0008270;GO:0008270;	-	-	-	-	-
Bo8g067770	3.2017160119697801	1.67884534836241	0.0311696	0.14228	2.17453391114903	1.12070620733731	0.0443864	0.168379	C8	21998016	21998897	+	642	-	GO:0016787;GO:0016787;	K07766	EC:3.6.1.52	-	106311959	A0A0D3DQ63
Bo4g039230	2.4461694231239099	1.2905243292274999	0.0316381	0.1441	0.413527205163211	-1.27394585022365	0.00581708	0.0362236	C4	8622381	8624533	+	1272	-	GO:0003978;GO:0003978;GO:0006012;GO:0006012;GO:0016853;	K12448	EC:5.1.3.5	-	106337328	A0A0D3BS03
Bo7g107740	3.3103018291963302	1.72696276616614	0.0320189	0.145425	2.022482128065	1.01612695414306	0.0263906	0.115278	C7	42225259	42229947	-	4065	-	GO:0005515;GO:0007165;GO:0007165;GO:0043531;GO:0043531;	-	-	-	106307032	A0A0D3DFC6
Bo9g166480	2.42485935306689	1.2779010703853599	0.0326086	0.147564	0.463067117501077	-1.11070678030404	0.0183783	0.0879186	C9	49319835	49322786	-	1452	-	GO:0005215;GO:0005215;GO:0016020;GO:0016021;GO:0016021;GO:0016021;GO:0055085;GO:0055085;	-	-	-	106312938	A0A0D3EFP9
Bo4g069210	2.8343864220767601	1.5030364594591299	0.0331982	0.149704	3.31414846047595	1.72863823092239	2.24897e-05	0.000362082	C4	14614778	14615089	+	312	-	GO:0000786;GO:0000786;GO:0000786;GO:0003677;GO:0003677;GO:0003677;GO:0005634;GO:0005634;GO:0005634;GO:0005694;GO:0005730;GO:0005774;GO:0005829;GO:0005886;GO:0006334;GO:0006334;GO:0009414;GO:0009506;GO:0009507;GO:0009579;GO:0046982;GO:0046982;	K11254	-	-	106343328	A0A0D3C2P6
Bo3g010070	3.3422865100160499	1.7408354104973101	0.0339779	0.152439	50.606615433926	5.66125408514052	7.4109e-10	3.35961e-08	C3	3491193	3493064	+	1428	-	GO:0016829;GO:0030570;GO:0030570;GO:0030570;GO:0045490;GO:0045490;GO:0046872;GO:0046872;	K01728	EC:4.2.2.2	-	106332735	A0A0D3B174
Bo3g029790	5.0942784464219404	2.3488778175417	0.034155	0.15308	4.09407972915173	2.03353919804569	0.00397042	0.0269059	C3	11138101	11139779	+	1014	-	GO:0005096;GO:0005096;GO:0043547;GO:0046872;GO:0046872;	K12486	-	-	106334967	A0A0D3B552
Bo3g012270	4.5276824647941201	2.1787727826993	0.034176	0.153148	0.0109162147558646	-6.51738350747646	9.10834e-08	2.77404e-06	C3	4085883	4088267	+	1722	-	GO:0005509;GO:0005509;GO:0016491;GO:0016491;GO:0055114;GO:0055114;	K17871	EC:1.6.5.9	-	106332441	A0A0D3B1J5
Bo2g091210	Inf	Inf	0.0342367	0.153365	4.11378051602906	2.04046482330295	0.00254131	0.0189597	C2	24657325	24658317	+	462	-	GO:0004869;GO:0004869;GO:0004869;GO:0010466;GO:0010951;GO:0030414;	-	-	-	-	-
Bo9g181470	2.4973170912729601	1.3203790158848301	0.0343333	0.153704	0.429630978592013	-1.21883007211863	0.0105146	0.0572496	C9	53601389	53604392	-	2466	-	GO:0004806;GO:0004806;GO:0006629;GO:0006629;GO:0006629;GO:0008152;GO:0008152;GO:0016020;GO:0016021;GO:0016021;GO:0016042;GO:0016042;GO:0016787;	K14674	-	-	106318006	A0A0D3EI05
Bo9g022430	2.35321420815563	1.2346326520445401	0.0345623	0.154562	0.287096029383117	-1.80039471707267	1.69056e-05	0.000285449	C9	6989280	6991241	-	1206	-	GO:0003824;GO:0003824;	K00830	-	-	106318812	A0A0D3E2U4
Bo1g144860	2.0283529065397299	1.02030868400826	0.0348036	0.155306	0.48962087294604	-1.03026303225334	0.00758431	0.0443482	C1	41330673	41331078	-	327	-	-	-	-	-	-	-
Bo3g042520	3.4793781393740302	1.79882947980688	0.0348503	0.155454	2.63825093747124	1.39958179318222	0.00231097	0.01764	C3	17488581	17491998	-	2211	-	GO:0000166;GO:0004672;GO:0004672;GO:0004674;GO:0005515;GO:0005524;GO:0005524;GO:0005524;GO:0006468;GO:0006468;GO:0016020;GO:0016021;GO:0016021;GO:0016301;GO:0016310;GO:0016740;	-	-	-	-	-
Bo1g124760	Inf	Inf	0.0348578	0.155454	5.25862240857304	2.39468490890525	0.000206908	0.00241673	C1	37091196	37091971	-	294	-	GO:0003723;GO:0003735;GO:0003735;GO:0005622;GO:0005622;GO:0005840;GO:0005840;GO:0005840;GO:0006412;GO:0006412;GO:0019843;GO:0019843;GO:0030529;GO:0046872;GO:0046872;	K02922	-	-	106296433	A0A0D3AD79
Bo4g017430	2.8503479455089198	1.51113804160031	0.0348717	0.155498	0.495545954977384	-1.01290924142368	0.0474869	0.176823	C4	2406741	2407511	+	771	-	-	-	-	-	106342730	A0A0D3BPG0
Bo3g010150	3.3068744018232801	1.72546825166519	0.035558	0.157962	0.142382464907688	-2.81215661254673	4.57287e-05	0.00067706	C3	3532163	3532513	-	351	-	-	-	-	-	106333247	A0A0D3B182
Bo9g024140	3.7048666055442601	1.88942159894561	0.0362622	0.160087	2.87658861947706	1.52435891621927	0.000893334	0.00815094	C9	7609168	7609910	-	501	-	GO:0016020;GO:0016021;GO:0016021;	-	-	-	-	-
Bo2g004170	2.4842049773416801	1.31278421848341	0.0364529	0.160491	0.45010398641548	-1.15166975265584	0.0153457	0.0766054	C2	733819	736689	+	1776	-	GO:0010197;	-	-	-	106325205	A0A0D3AHN1
Bo3g015740	6.1238607723214598	2.6144414831373899	0.0369055	0.162139	0.196271646262123	-2.34907632122512	0.0148015	0.0744855	C3	5336803	5338692	-	1155	-	-	-	-	-	-	-
Bo6g076180	2.3562998594000999	1.2365231461895601	0.03702	0.162469	0.313581611460795	-1.67308713311326	0.000403766	0.00421458	C6	22140738	22142375	+	1638	-	GO:0004190;GO:0004190;GO:0004190;GO:0006508;GO:0006508;GO:0006508;GO:0008233;GO:0016787;	K22683	EC:3.4.23.-	-	106296300	A0A0D3CUQ1
Bo4g195030	2.7518376226507502	1.4603953436199899	0.0370478	0.162552	2.72272567078932	1.44505163044293	0.00037835	0.00397927	C4	52648049	52649976	+	978	-	-	K15262	-	-	106342330	A0A0D3C690
Bo9g029430	7.4245798238956704	2.8923093823935999	0.0372017	0.163093	2.60038837211403	1.37872710813058	0.0188845	0.0897531	C9	10378959	10380380	-	672	-	-	-	-	-	106315435	A0A0D3E3Z7
Bo5g131620	2.9306477921127301	1.5512195940578899	0.0373121	0.163496	0.463495234416597	-1.10937358951852	0.0378283	0.150076	C5	40567369	40568762	+	705	-	-	-	-	-	106292980	A0A0D3CKC4
Bo9g173670	2.9091508069080101	1.5405980859669199	0.0376063	0.164537	0.141455413799719	-2.82158070208714	7.99968e-05	0.00108362	C9	51190986	51193973	+	2022	-	GO:0000166;GO:0005524;GO:0005524;GO:0005524;GO:0016887;GO:0016887;	-	-	-	106313066	A0A0D3EGM2
Bo9g113930	3.3605157422054499	1.74868266205864	0.037642	0.164634	0.422550773914511	-1.24280338811138	0.0429045	0.164291	C9	36685146	36686405	+	732	-	GO:0005789;GO:0005789;	-	-	-	106316051	A0A0D3EAV8
Bo9g056000	2.0341990138130499	1.0244608307174501	0.0377533	0.164948	0.428721923116024	-1.22188590222027	0.0108161	0.0585078	C9	16657219	16658226	-	1008	-	GO:0008146;GO:0008146;GO:0016740;	-	-	-	106313637	A0A0D3E5X4
Bo5g117320	2.6402667504618398	1.40068369478347	0.0382359	0.166529	0.45601415711231	-1.13284948085112	0.0254936	0.112383	C5	36044039	36045433	+	930	-	GO:0004844;GO:0004844;GO:0004844;GO:0005634;GO:0005634;GO:0005739;GO:0005739;GO:0006281;GO:0006281;GO:0006281;GO:0006284;GO:0006284;GO:0006284;GO:0006974;GO:0016787;GO:0016799;GO:0016799;	-	-	-	-	-
Bo1g017210	4.0707313466624599	2.0252880120387	0.0383046	0.166711	2.05334632863905	1.03797698081775	0.0448138	0.169572	C1	5872784	5874288	-	1281	-	GO:0004497;GO:0004499;GO:0004499;GO:0016491;GO:0016491;GO:0016491;GO:0050660;GO:0050660;GO:0050661;GO:0050661;GO:0055114;GO:0055114;GO:0055114;	K11816	EC:1.14.13.168	-	106343643	A0A0D3A3P9
Bo3g138580	4.5023028299940702	2.1706630973601402	0.0386554	0.168002	2.68873803369377	1.4269291989067	0.00601417	0.0371478	C3	50341084	50345170	+	1323	-	GO:0016020;GO:0016021;GO:0016021;	-	-	-	106328770	A0A0D3BI45
Bo8g108960	3.3021870740636001	1.72342185349733	0.038943	0.168951	0.342040022952542	-1.54776294656912	0.0464749	0.174129	C8	38923575	38926765	+	1725	-	GO:0005516;GO:0005516;GO:0006952;GO:0006952;GO:0006952;GO:0009607;GO:0009607;GO:0016020;GO:0016021;GO:0016021;GO:0016021;	K08472	-	-	106309450	A0A0D3DXZ6
Bo3g001080	Inf	Inf	0.0392287	0.169938	4.17203958368409	2.06075284599618	0.00320864	0.0227408	C3	33928	34353	+	426	-	GO:0003824;GO:0003824;GO:0006633;GO:0006633;GO:0008152;GO:0008152;GO:0016020;GO:0016020;GO:0016747;GO:0016747;	-	-	-	-	-
Bo4g116730	3.55375937539984	1.8293459999738599	0.0394218	0.170575	26.1208563675182	4.70713029104119	2.23867e-10	1.14851e-08	C4	29788558	29790615	+	1359	-	GO:0004553;GO:0004553;GO:0005975;GO:0005975;GO:0016787;	-	-	-	106337088	A0A0D3BXR1
Bo4g188840	2.70097335482131	1.43347940768962	0.0396088	0.171186	0.368973917807124	-1.43840925686793	0.00697842	0.0416096	C4	50884670	50889225	-	915	-	GO:0016311;GO:0016791;GO:0016791;	K15731	EC:3.1.3.16	-	106337225	A0A0D3C5B8
Bo4g165330	3.1215717624958601	1.64227263260742	0.0397383	0.171586	0.293764141412695	-1.76726979212921	0.0110977	0.0597716	C4	44485029	44486480	-	1452	-	GO:0008152;GO:0008152;GO:0016740;GO:0016757;GO:0016758;GO:0016758;	-	-	-	106336799	A0A0D3C2K3
Bo2g097380	8.4074804338700808	3.07167351627443	0.0397802	0.171727	24.3789295776196	4.60756287683554	6.7976e-07	1.69374e-05	C2	27512392	27514463	-	1272	-	GO:0015031;GO:0015031;	-	-	-	-	-
Bo2g012260	2.69557959630946	1.43059551075821	0.040113	0.172743	0.400331727359628	-1.32073213719205	0.0050325	0.0324062	C2	3494978	3499405	-	1641	-	GO:0016020;GO:0016020;GO:0016020;GO:0016021;GO:0016021;GO:0022857;GO:0022857;GO:0055085;GO:0055085;	-	-	-	106325340	A0A0D3AJ43
Bo9g002160	3.0950534593007402	1.62996432860012	0.0401642	0.172924	0.133160069001756	-2.9087665717112	2.29473e-05	0.000368338	C9	115489	117526	+	675	-	-	K21994	-	-	106316904	A0A0D3DZK8
Bo9g133310	Inf	Inf	0.040458	0.173947	3.26100219842706	1.70531541368949	0.0184976	0.0883652	C9	40765739	40766434	-	696	-	-	-	-	-	-	-
Bo3g007420	2.3373407488044098	1.22486807249254	0.0404696	0.173977	0.440357033020593	-1.18325438727528	0.0160135	0.0791005	C3	2691093	2692589	-	1497	-	-	-	-	-	106336318	A0A0D3B0Q8
Bo1g155070	2.1065745658661998	1.07489898350114	0.0413125	0.176824	2.19561965655462	1.13462816038746	0.000240657	0.00275161	C1	43189075	43189635	-	561	-	GO:0061929;	K19761	EC:2.3.2.-	-	106341619	A0A0D3AFY1
Bo5g059850	13.419969925930801	3.7463095333584602	0.0417672	0.178273	0.113488168425119	-3.13938619599803	0.0220705	0.100553	C5	18855840	18860387	+	2097	-	GO:0046872;GO:0046872;GO:0046872;	-	-	-	-	-
Bo7g109730	4.2911095033968598	2.1013507172111798	0.042388	0.180163	2.19338745818022	1.13316068415946	0.0268917	0.116866	C7	43467932	43469621	-	1104	-	-	K01076	EC:3.1.2.22	-	106301609	A0A0D3DFX4
Bo00685s080	2.3577616822552701	1.2374179010130999	0.0427285	0.181362	0.356260361236564	-1.48899612174091	0.0185665	0.0886261	Scaffold00685	104897	105684	-	459	-	GO:0046983;GO:0046983;	-	-	-	-	-
Bo5g010770	Inf	Inf	0.0428586	0.181707	4.5060091864604	2.17185025481776	0.00145653	0.0121243	C5	4128892	4132073	-	975	-	GO:0000398;GO:0000398;GO:0003723;GO:0003723;GO:0089701;GO:0089701;	-	-	-	-	-
Bo7g089430	Inf	Inf	0.0428586	0.181707	0	-Inf	0.00302362	0.021737	C7	34606426	34608220	-	657	-	-	K13456	-	-	106306687	A0A0D3DBT9
Bo3g165700	4.8288578068325601	2.2716819817549601	0.0433356	0.182863	0.0649840479886138	-3.9437705748977	7.08774e-05	0.000981784	C3	58350079	58352711	+	2007	-	GO:0000166;GO:0004672;GO:0004672;GO:0004674;GO:0005524;GO:0005524;GO:0005524;GO:0006468;GO:0006468;GO:0016020;GO:0016021;GO:0016021;GO:0016301;GO:0016310;GO:0016740;	-	-	-	106329112	A0A0D3BL24
Bo7g080470	3.3574752404457202	1.74737676060048	0.0434501	0.183109	0.388683810683998	-1.36333107656533	0.0429398	0.164376	C7	30766805	30769492	+	1245	-	GO:0003677;GO:0003677;GO:0003677;GO:0005634;GO:0005634;GO:0006351;GO:0006351;GO:0006355;GO:0006355;GO:0006355;	-	-	-	106301658	A0A0D3DAD9
Bo8g106980	2.64013599611576	1.4006122462005599	0.0436189	0.18355	0.32262942985609	-1.63205004954049	0.000922673	0.00836354	C8	37906958	37908733	+	1452	-	GO:0003676;GO:0003676;GO:0003723;GO:0003723;GO:0003729;GO:0003729;GO:0009737;GO:0009737;	K21444	-	-	106307630	A0A0D3DXE8
Bo1g071130	6.0334855363140703	2.5929916859027302	0.0436526	0.18366	0.20261750403473	-2.30316928159099	0.0201072	0.0939894	C1	21114863	21117535	-	1815	-	GO:0004553;GO:0004553;GO:0005975;GO:0005975;GO:0008152;GO:0016787;GO:0016798;	K05349	EC:3.2.1.21	-	106292219	A0A0D3A8X7
Bo3g132730	2.0687063650894602	1.0487288816924401	0.0440117	0.18486	2.4384717929233	1.28597728406333	0.0133484	0.0688749	C3	48400528	48401613	-	1086	-	GO:0004842;GO:0004842;GO:0005634;GO:0005634;GO:0005737;GO:0005737;GO:0009414;GO:0009414;GO:0009737;GO:0009737;GO:0010200;GO:0010200;GO:0051865;GO:0051865;	-	-	-	106336306	A0A0D3BHK6
Bo6g074430	10.2427491143438	3.3565310759806999	0.0445358	0.18623	0.0767687226591282	-3.70333754621799	0.00566384	0.0355773	C6	21574577	21576436	-	1233	-	GO:0006812;GO:0006812;GO:0008324;GO:0008324;GO:0016020;GO:0016021;GO:0016021;GO:0016021;GO:0055085;GO:0055085;GO:0098655;	-	-	-	106299352	-
Bo6g012160	2.02799853035485	1.0200566068528201	0.0448972	0.187446	0.49377793166945	-1.01806573508244	0.0116417	0.0619258	C6	2703374	2705736	+	1653	-	-	-	-	-	106296910	A0A0D3CP54
Bo7g118500	2.33613042309497	1.2241208202367	0.0452858	0.188561	0.293627235243298	-1.76794230406276	0.00109882	0.00968788	C7	47520124	47522999	-	1479	-	GO:0004497;GO:0004497;GO:0005506;GO:0005506;GO:0016491;GO:0016705;GO:0016705;GO:0020037;GO:0020037;GO:0046872;GO:0055114;GO:0055114;GO:0055114;	-	-	-	-	-
Bo9g175460	2.21460678803721	1.1470505654585901	0.0455409	0.18939	46.1158559644269	5.52719097109942	1.11576e-10	6.04777e-09	C9	52027024	52028687	+	1098	-	GO:0005618;GO:0005618;GO:0016787;GO:0030599;GO:0030599;GO:0042545;GO:0042545;GO:0045330;GO:0045330;	K01051	EC:3.1.1.11	-	106316444	A0A0D3EH51
Bo3g061470	2.6224145336356202	1.39089575510596	0.0456139	0.189609	62.1910688675816	5.95863550762922	5.90814e-14	6.53741e-12	C3	23515995	23517736	-	1062	-	GO:0004650;GO:0004650;GO:0005576;GO:0005576;GO:0005975;GO:0005975;GO:0008152;GO:0016787;GO:0016798;GO:0071555;GO:0071555;	-	-	-	-	-
Bo5g094580	3.1089242611031298	1.63641547050275	0.0456569	0.189703	2.96604786182309	1.56854187812218	0.000252943	0.00286755	C5	30741477	30741983	-	198	-	GO:0005524;	-	-	-	-	-
Bo3g001900	2.8511819539426799	1.5115601107155301	0.04589	0.190458	3.40193062409154	1.7663537202783	2.26567e-05	0.0003643	C3	438513	440191	-	858	-	GO:0003677;GO:0003677;GO:0003700;GO:0003700;GO:0005634;GO:0005634;GO:0005667;GO:0005667;GO:0006351;GO:0006351;GO:0006355;GO:0006355;GO:0006355;GO:0007049;GO:0007049;	-	-	-	106332014	A0A0D3AZF5
Bo2g047960	2.0522498039027801	1.0372063493256201	0.0460723	0.190917	0.122778635810882	-3.02586854957944	1.00534e-21	5.6969e-19	C2	13465022	13467255	-	1857	-	GO:0000302;GO:0000302;GO:0005737;GO:0005737;GO:0006950;GO:0006950;GO:0006970;GO:0007623;GO:0007623;GO:0009409;GO:0009409;GO:0009414;GO:0009414;GO:0009609;GO:0009609;GO:0009611;GO:0009611;GO:0009651;GO:0009737;GO:0009737;GO:0009737;GO:0010150;GO:0010150;GO:0010555;GO:0010555;GO:0042538;GO:0042538;GO:1902074;GO:1902074;GO:2000280;GO:2000280;	-	-	-	106327415	A0A0D3AMT6
Bo7g074000	2.0310581958173501	1.0222315777011499	0.0461147	0.191029	0.328057301427683	-1.60798026399118	1.9913e-06	4.43297e-05	C7	27821444	27822169	+	726	-	GO:0016020;GO:0016021;GO:0016021;	-	-	-	106304616	A0A0D3D9D9
Bo1g131210	Inf	Inf	0.0466431	0.192639	11.5071870754662	3.52446330557331	7.21946e-11	4.04203e-09	C1	38274509	38275165	+	285	-	GO:0003677;GO:0003677;GO:0003677;GO:0005634;GO:0005634;	-	-	-	-	-
Bo7g116090	2.3844133099158999	1.25363433164067	0.0470415	0.194026	2.50762386236677	1.32632096353295	0.0010083	0.00902167	C7	46319639	46326212	-	3561	-	GO:0003677;GO:0003677;GO:0003677;GO:0005515;GO:0005634;GO:0005634;GO:0006351;GO:0006351;GO:0006355;GO:0006355;GO:0010997;GO:0010997;GO:0015031;GO:0015031;GO:0097027;GO:0097027;GO:1904668;GO:1904668;	-	-	-	-	-
Bo9g149800	3.0331203672571001	1.6008027514402301	0.0478803	0.196592	0.185742168155559	-2.42862671427878	0.00110455	0.00973148	C9	44428082	44429461	+	894	-	-	-	-	-	106313121	A0A0D3EDH2
Bo5g057230	7.0268267470600101	2.8128733280140499	0.0480383	0.197132	4.40085451165738	2.13778367830373	0.00231856	0.0176787	C5	18371449	18374000	-	1755	-	GO:0005509;GO:0005509;GO:0016020;GO:0016021;GO:0016021;	-	-	-	106292853	A0A0D3CED2
Bo9g113920	2.92211054376684	1.5470107564876101	0.0480772	0.197266	2.62442827891039	1.39200317172505	0.00202357	0.0158122	C9	36672278	36674484	-	1089	-	GO:0016020;GO:0016020;	-	-	-	106313009	A0A0D3EAV7
Bo6g087760	2.1193333064476998	1.08361049745286	0.0483213	0.198119	0.484132456445302	-1.04652627855872	0.00057436	0.00568137	C6	27863356	27866172	-	1383	-	GO:0016020;GO:0016021;GO:0016021;	K01054	EC:3.1.1.23	-	106301066	A0A0D3CWW3
Bo9g075970	2.20694449408257	1.1420503454676401	0.0490576	0.200674	0.366738715670813	-1.44717551916243	0.00166621	0.0135677	C9	22903335	22904439	+	630	-	GO:0007094;GO:0007094;	K02537	-	-	106316367	A0A0D3E7Y4
Bo8g112180	6.3439187195360098	2.66537428685628	0.049245	0.201153	0.0328874957728475	-4.92631703181852	0.000100139	0.00131088	C8	39686467	39689002	+	1818	-	GO:0000166;GO:0005524;GO:0005524;GO:0009860;GO:0016592;	-	-	-	-	-
Bo1g039200	2.0720704123201399	1.05107302897962	0.0494659	0.201922	68.0837710317201	6.08923904228272	2.34296e-11	1.44838e-09	C1	11845031	11845957	+	552	-	GO:0004857;GO:0004857;GO:0043086;	-	-	-	106296340	A0A0D3A612
Bo9g163290	3.0148702694345202	1.5920959239594501	0.0497546	0.202848	0.205176594319845	-2.28506193111895	0.00215316	0.0166621	C9	48002135	48003342	+	750	-	GO:0005515;GO:0007165;GO:0007165;GO:0016311;GO:0016311;GO:0016791;GO:0016791;	-	-	-	-	-
Bo5g008120	Inf	Inf	0.049982	0.203426	3.02862774265211	1.59866426323273	0.034425	0.140067	C5	2691071	2691298	-	228	-	-	-	-	-	-	-
Bo5g144910	1.6597155046621699E-4	-12.556776412187	1.25227e-79	1.55348e-75	23.517561049595	4.55566654434293	0.0100766	0.0553155	C5	44803419	44808682	+	2208	-	GO:0003824;GO:0003824;GO:0008152;GO:0008152;	-	-	-	-	-
Bo2g026620	6.8752697126964603E-4	-10.506296068855701	3.58558e-62	6.0655e-59	10.3195178211793	3.36730365738835	0.0321267	0.133105	C2	7822231	7824433	-	522	-	GO:0003700;GO:0006355;GO:0043565;	-	-	-	-	-
Bo5g025110	3.2337545353162498E-3	-8.2725741123817809	1.14781e-56	1.3349e-53	10.9152682358102	3.44827567896946	2.3603e-05	0.000377406	C5	8648822	8652064	-	1767	-	GO:0000165;GO:0000166;GO:0004672;GO:0004672;GO:0004674;GO:0004707;GO:0004707;GO:0004707;GO:0005524;GO:0005524;GO:0005524;GO:0005622;GO:0005622;GO:0006468;GO:0006468;GO:0016301;GO:0016310;GO:0016740;	K20538	EC:2.7.11.24	-	106344086	A0A0D3CB49
Bo8g105760	1.8791573286989099E-3	-9.0556984260830298	2.25304e-43	9.63782e-41	12.2162633892052	3.61073116775066	0.00462863	0.0304077	C8	37281874	37283224	-	894	-	-	K03243	-	-	106309683	-
Bo4g178110	1.6067783319346E-2	-5.9596852784823904	6.50821e-40	2.285e-37	0.0484880266862481	-4.36622764810262	0.000190197	0.00224822	C4	47329118	47332115	+	1542	-	GO:0016788;GO:0016788;	-	-	-	-	-
Bo5g020560	2.44118882079285E-4	-12.000128490704	5.17303e-38	1.60433e-35	73.7544248493102	6.2046577004073	0.016041	0.0792094	C5	7106773	7108063	+	1059	-	GO:0008168;GO:0008168;GO:0032259;	-	-	-	106294987	A0A0D3CAE2
Bo2g013900	5.8248651074578502E-3	-7.4235596445183401	1.74345e-37	5.2105e-35	33.2697008428419	5.05613698862576	4.51681e-09	1.7952e-07	C2	4438427	4440386	-	1473	-	GO:0000166;GO:0005524;GO:0005524;GO:0005524;	-	-	-	106324734	A0A0D3AJK7
Bo5g002510	2.3438518155593901E-2	-5.4149748280843104	1.75009e-37	5.2105e-35	0.355033480419301	-1.4939730146156	0.00840717	0.0480043	C5	286459	287913	+	1455	-	GO:0008152;GO:0008152;GO:0016740;GO:0016757;GO:0016758;GO:0016758;	K08237	EC:2.4.1.218	-	106343816	A0A0D3C6Y2
Bo9g069650	2.78611734165011E-2	-5.1656001692182798	6.12367e-36	1.65144e-33	2.12896672019955	1.09015339789808	0.0137204	0.070313	C9	20752477	20753118	-	408	-	GO:0016020;GO:0016021;GO:0016021;	-	-	-	-	-
Bo4g190710	1.8605307775187999E-2	-5.7481419335725397	6.17746e-34	1.46433e-31	2.48303798553745	1.31210633204529	0.0447445	0.16936	C4	51362219	51364610	+	1218	-	GO:0004672;GO:0004672;GO:0005524;GO:0005524;GO:0006468;GO:0006468;	-	-	-	-	-
Bo3g066360	3.3861051073911401E-2	-4.8842294334465297	5.0182e-33	1.13186e-30	0.11940460038871	-3.06606967344274	4.3114e-06	8.69722e-05	C3	25956193	25958838	+	1539	-	GO:0005506;GO:0005506;GO:0016020;GO:0016021;GO:0016021;GO:0016705;GO:0016705;GO:0020037;GO:0020037;GO:0055114;GO:0055114;	-	-	-	106334975	A0A0D3BBC4
Bo9g154050	4.8430105817585598E-3	-7.6898801294958501	2.82958e-29	4.92082e-27	15.0137196441182	3.90820954335278	0.000376809	0.00396561	C9	45856595	45857718	+	426	-	GO:0000724;GO:0000724;GO:0003677;GO:0003677;	-	-	-	-	-
Bo7g005380	5.9818730399787801E-2	-4.0632588989324301	3.04752e-28	4.90981e-26	3.05439134908953	1.61088492173502	1.38941e-06	3.19581e-05	C7	1397390	1398556	-	762	-	-	-	-	-	106301966	-
Bo5g004490	4.4760336791441299E-2	-4.4816352981093397	5.48522e-28	8.64991e-26	0.111576120279284	-3.16389980285504	0.000438605	0.00453019	C5	1271249	1273341	+	1068	-	GO:0016491;GO:0016491;GO:0016491;GO:0046872;GO:0046872;GO:0055114;GO:0055114;GO:0055114;	-	-	-	106344024	A0A0D3C7I0
Bo2g037640	2.36556723837229E-2	-5.4016700214900899	1.77512e-26	2.47427e-24	106.203762349002	6.73069106539045	7.34021e-16	1.25353e-13	C2	10338069	10341095	-	2262	-	GO:0016020;GO:0016021;GO:0016021;GO:0055085;GO:0055085;	-	-	-	106327470	A0A0D3ALU7
Bo3g154020	3.6165072702857001E-2	-4.78925913785194	1.57478e-25	2.04206e-23	0.20896730975873	-2.25865082596743	0.00873243	0.0494688	C3	55220704	55221958	+	882	-	-	-	-	-	106332529	A0A0D3BJZ8
Bo4g031190	0	-Inf	2.47536e-25	3.19872e-23	Inf	Inf	2.64796e-05	0.000418747	C4	7141616	7142283	+	300	-	-	-	-	-	-	-
Bo1g139130	8.2198930725659605E-2	-3.60473656286073	2.49284e-25	3.21016e-23	0.175866356408526	-2.50744857617605	2.65183e-06	5.65764e-05	C1	39785316	39787819	+	1947	-	GO:0000166;GO:0005524;GO:0005524;GO:0005524;GO:0005618;GO:0005618;GO:0005739;GO:0005739;GO:0005774;GO:0005774;GO:0005794;GO:0005794;GO:0005829;GO:0005829;GO:0005886;GO:0005886;GO:0009266;GO:0009408;GO:0009408;GO:0009615;GO:0009615;GO:0009617;GO:0009617;GO:0009644;GO:0009644;GO:0016567;GO:0016567;GO:0031625;GO:0031625;GO:0042542;GO:0042542;GO:0046686;GO:0046686;GO:0048046;GO:0048046;	K03283	-	-	106318090	A0A0D3AE77
Bo6g057670	3.1279163155694303E-2	-4.9986542745488904	3.0107e-23	3.20132e-21	0.219862468689116	-2.18532674288777	0.000245138	0.00279262	C6	15683279	15688044	+	1458	-	GO:0004144;GO:0004144;GO:0016020;GO:0016021;GO:0016021;GO:0045017;GO:0045017;	K15406	-	-	106300527	A0A0D3CST8
Bo3g185460	4.9423754054312201E-2	-4.3386515929112299	3.8852e-23	4.06156e-21	3.33444443821317	1.7374464096852	0.00014287	0.00176814	C3	64756907	64757392	-	486	-	GO:0009522;GO:0009522;GO:0015979;GO:0015979;GO:0016020;GO:0016020;GO:0016168;	K08905	-	-	106328748	A0A0D3BNB1
Bo8g092540	5.62423994988136E-2	-4.1521980436005403	6.04792e-23	6.20451e-21	2.1350281531919	1.09425509382822	0.0163279	0.0803292	C8	31561572	31562854	-	369	-	GO:0016020;GO:0016021;GO:0016021;	K08504	-	-	106309902	A0A0D3DU51
Bo5g048590	7.1360348462795398E-3	-7.1306616245002896	1.7696e-22	1.73767e-20	7.31953843537095	2.87175267610543	0.032806	0.135141	C5	15767972	15769066	+	276	-	-	-	-	-	-	-
Bo8g054160	3.9239001438845102E-2	-4.6715678617128997	1.665e-21	1.51874e-19	3.9614165492031	1.98601641087972	0.0198999	0.0933001	C8	17806934	17807194	-	261	-	-	-	-	-	106308152	A0A0D3DN95
Bo8g051250	5.3607712631005403E-2	-4.22141561121785	1.61691e-20	1.38333e-18	2.25389496584282	1.17242028579034	0.0233808	0.10524	C8	17146494	17151091	-	1983	-	GO:0000166;GO:0000166;GO:0000166;GO:0004812;GO:0004812;GO:0004812;GO:0004814;GO:0004814;GO:0005524;GO:0005524;GO:0005524;GO:0005737;GO:0005737;GO:0006412;GO:0006418;GO:0006418;GO:0006420;GO:0006420;GO:0016874;	-	-	-	-	-
Bo9g117690	1.1637396323947899E-2	-6.4250878747161098	1.67986e-20	1.43389e-18	11.484432438982	3.52160765532991	0.000149276	0.00183769	C9	37425108	37426147	-	468	-	-	-	-	-	-	-
Bo7g065220	4.3966826611984797E-2	-4.5074407826817398	2.41985e-20	2.0378e-18	3.52499588011045	1.81762157134187	0.000765165	0.00717582	C7	24835269	24838198	-	1020	-	GO:0016020;GO:0016021;GO:0016021;	-	-	-	-	-
Bo8g036740	4.9132281094618403E-2	-4.3471849682413	5.07693e-20	4.16174e-18	0.290951851480502	-1.7811476681374	0.0256367	0.112855	C8	12916750	12922158	-	1461	-	GO:0008430;GO:0008430;	K17285	-	-	106310361	-
Bo3g134050	6.5891700091889202E-2	-3.9237594391149102	1.07208e-19	8.39973e-18	2.14473924447965	1.10080225678606	0.0188598	0.0896489	C3	48709460	48711439	-	1353	-	GO:0000166;GO:0003924;GO:0003924;GO:0003924;GO:0005200;GO:0005200;GO:0005525;GO:0005525;GO:0005525;GO:0005737;GO:0005737;GO:0005856;GO:0005874;GO:0005874;GO:0005874;GO:0007010;GO:0007017;GO:0007017;	K07375	-	-	106335424	A0A0D3BGJ7
Bo4g032370	5.9172015824450697E-2	-4.07894114528	1.59641e-19	1.23518e-17	2.21802454345045	1.14927532966479	0.00110724	0.00974669	C4	7247407	7247871	-	465	-	GO:0005515;	K08770	-	-	106342618	A0A0D3BRG2
Bo1g014570	0.101554805264699	-3.2996695896941	4.94142e-19	3.678e-17	0.111969228485907	-3.15882579126893	4.59569e-07	1.18783e-05	C1	4813152	4817502	+	2652	-	GO:0000166;GO:0000166;GO:0006812;GO:0006812;GO:0016020;GO:0016021;GO:0016021;GO:0016021;GO:0016787;GO:0019829;GO:0019829;GO:0030001;GO:0030001;GO:0046872;GO:0046872;GO:0099132;	K01534	-	-	106316494	A0A0D3A384
Bo3g001800	2.1135402214329801E-2	-5.5641946221376202	8.96715e-19	6.55641e-17	7.76781723492058	2.95750925670772	0.000233554	0.00268272	C3	385848	389321	+	786	-	GO:0005576;GO:0005576;GO:0005576;GO:0005618;GO:0005618;GO:0009664;GO:0009664;GO:0016020;GO:0016020;	-	-	-	106329056	A0A0D3AZE5
Bo8g095940	6.2819020245579393E-2	-3.9926547475468102	1.66795e-18	1.20066e-16	0.456225345305289	-1.13218149801692	0.00915459	0.051347	C8	32880723	32882112	+	861	-	GO:0005739;GO:0005739;GO:0005773;GO:0005773;GO:0005886;GO:0005886;GO:0006833;GO:0009414;GO:0009414;GO:0009506;GO:0009506;GO:0009941;GO:0009941;GO:0015250;GO:0015250;GO:0015267;GO:0015267;GO:0016020;GO:0016020;GO:0016020;GO:0016020;GO:0016021;GO:0016021;GO:0055085;GO:0055085;	K09872	-	-	106311836	A0A0D3DUU2
Bo9g164120	0.12895466853814899	-2.9550640910125301	3.25963e-18	2.29754e-16	0.419626141299493	-1.25282353911615	3.18735e-05	0.000493105	C9	48531745	48535466	+	2922	-	GO:0000166;GO:0005524;GO:0005524;GO:0005524;GO:0005737;GO:0005737;GO:0009408;GO:0009408;GO:0016485;GO:0019538;GO:0019538;GO:0042026;GO:0042026;	K03695	-	-	106317763	A0A0D3EFB2
Bo3g177130	7.1054044750443399E-2	-3.81493941257528	2.83861e-17	1.85662e-15	3.01613025325491	1.59269873353603	0.00056354	0.00560095	C3	61987544	61988081	+	369	-	GO:0000276;GO:0000276;GO:0015078;GO:0015078;GO:0015986;GO:0015986;	K02140	-	-	106336439	A0A0D3BMC3
Bo7g115820	4.3884108856930303E-2	-4.5101575785733203	3.22952e-17	2.1049e-15	3.85529671871854	1.94684189986799	0.00155793	0.0128318	C7	46179440	46181181	-	957	-	GO:0016020;GO:0016021;GO:0016021;	-	-	-	-	-
Bo5g020200	6.2888474111797404E-2	-3.9910605584482002	3.46497e-17	2.25441e-15	2.26601828767954	1.180159504335	0.0293286	0.124945	C5	6916674	6922028	-	2601	-	GO:0006479;GO:0006479;GO:0008168;GO:0008168;GO:0008168;GO:0016740;GO:0032259;	-	-	-	-	-
Bo4g162630	0.12385972268052101	-3.0132209738814399	4.24639e-17	2.73888e-15	0.404218193882527	-1.30679383592733	0.000250171	0.00283957	C4	43953092	43954245	-	918	-	-	K13206	-	-	106337250	A0A0D3C2D1
Bo3g006930	0.13261908638994299	-2.9146396734447002	5.20133e-17	3.32029e-15	0.436109313972304	-1.19723829254818	0.0001314	0.0016469	C3	2445315	2449756	+	3120	-	GO:0005886;GO:0005886;GO:0005985;GO:0005985;GO:0010208;GO:0010208;GO:0016157;GO:0016157;GO:0016740;GO:0016757;GO:0046524;GO:0046524;GO:0071836;GO:0071836;	K00696	EC:2.4.1.14	-	106328688	A0A0D3B0K9
Bo2g016530	3.65601676747358E-2	-4.7735835027771296	6.46299e-17	4.10455e-15	5.73775958414576	2.52048751951349	7.10499e-05	0.000982832	C2	4868497	4870900	-	1593	-	GO:0016020;GO:0016021;GO:0016021;GO:0016740;GO:0016757;GO:0016757;	K22809	EC:2.4.1.-	-	106323233	A0A0D3AJS2
Bo8g068500	4.23961228657741E-2	-4.5599238537144897	1.91394e-16	1.17153e-14	2.54448694210397	1.34737478765617	0.0111771	0.0601128	C8	22462368	22463676	-	1245	-	GO:0000139;GO:0000139;GO:0005794;GO:0016020;GO:0016021;GO:0016021;GO:0016740;GO:0016757;GO:0016757;GO:0071555;GO:0071555;	K20783	EC:2.4.2.-	-	106311990	A0A0D3DQD6
Bo8g082070	6.6800990559890805E-2	-3.9039866938830801	2.05747e-16	1.2532e-14	2.2863094875056	1.19302070795663	0.0276036	0.119364	C8	28092954	28098804	+	453	-	GO:0003735;GO:0003735;GO:0005840;GO:0005840;GO:0005840;GO:0006412;GO:0006412;GO:0030529;	K02955	-	-	106308043	A0A0D3DSJ9
Bo7g113150	0.13244599794686501	-2.9165238437010901	2.11491e-16	1.28608e-14	0.2904820052552	-1.78347930039071	5.67407e-07	1.43482e-05	C7	44651081	44652315	+	954	-	GO:0006457;GO:0006457;GO:0051082;GO:0051082;	K09510	-	-	106301670	A0A0D3DGL7
Bo4g048460	6.47514230878697E-2	-3.9489442894967501	2.50861e-16	1.51806e-14	2.48278495408814	1.31195930818968	0.0149525	0.0751141	C4	11242152	11246600	-	1446	-	GO:0003984;GO:0003984;GO:0009082;GO:0009082;	K01653	EC:2.2.1.6	-	106336970	A0A0D3BSY2
Bo1g051430	0.14628168393308499	-2.77317895530267	3.78251e-16	2.25232e-14	2.19186989760376	1.13216216707019	0.000254338	0.00288162	C1	14675631	14676978	+	900	-	-	-	-	-	106341805	A0A0D3A793
Bo1g144490	1.1787728043583801E-2	-6.4065705084467703	6.10349e-16	3.55474e-14	3.64320788258411	1.8652093180608	0.00334548	0.0235145	C1	41125141	41126286	+	249	-	GO:0046872;GO:0046872;	-	-	-	106328253	A0A0D3AEW6
Bo1g079030	5.5337733742423699E-2	-4.1755926276034101	1.23923e-15	6.94564e-14	3.27534252636661	1.71164578764263	0.00386562	0.0263918	C1	23588551	23592455	-	3597	-	GO:0001172;GO:0003676;GO:0003676;GO:0003723;GO:0003723;GO:0003968;GO:0003968;GO:0003968;GO:0016740;GO:0016779;GO:0031047;GO:0031047;	K11699	EC:2.7.7.48	-	106311438	A0A0D3A9H3
Bo4g030910	0.156004801290337	-2.6803376639333898	2.1801e-15	1.18966e-13	0.267194080555829	-1.90404004833044	0.000735213	0.00693919	C4	6915244	6918008	+	2160	-	GO:0003824;GO:0003824;GO:0005737;GO:0005737;GO:0005737;GO:0006559;GO:0006559;GO:0009698;GO:0009800;GO:0009800;GO:0016829;GO:0016841;GO:0016841;GO:0045548;GO:0045548;	K10775	EC:4.3.1.24	-	106342166	A0A0D3BRB5
Bo9g140890	6.6833889674379102E-2	-3.9032763495448699	4.80722e-15	2.53767e-13	2.23528239412706	1.16045710562364	0.0499553	0.183367	C9	42828026	42828550	-	447	-	GO:0000786;GO:0000786;GO:0000786;GO:0003677;GO:0003677;GO:0003677;GO:0005634;GO:0005634;GO:0005634;GO:0005694;GO:0046982;GO:0046982;	K11251	-	-	106315574	A0A0D3ECX4
Bo1g139150	0.145361355890639	-2.78228431307847	5.69015e-15	2.9784e-13	0.33112379088474	-1.59455742435671	1.06712e-05	0.000192338	C1	39793877	39796545	+	1818	-	GO:0003677;GO:0003677;GO:0005515;	-	-	-	106318110	A0A0D3AE79
Bo5g126810	7.5380915396201897E-2	-3.7296568751446699	2.50627e-14	1.20977e-12	2.28801331191547	1.19409544590064	0.0274504	0.118811	C5	39135671	39137593	-	606	-	GO:0004129;GO:0004129;GO:0005740;GO:0005740;GO:0022900;GO:1902600;	-	-	-	-	-
Bo2g088850	2.20817926395242E-2	-5.5009988923338504	2.57824e-14	1.24129e-12	6.35895525361484	2.66878975698146	0.00655803	0.0397392	C2	24265436	24266180	+	489	-	-	-	-	-	106325460	A0A0D3AR05
Bo1g147530	3.5290657796619801E-2	-4.8245698684392702	5.0218e-14	2.35084e-12	4.51789506000056	2.17565076073209	0.0069952	0.0416792	C1	41729687	41740937	+	5664	-	GO:0000148;GO:0000148;GO:0003843;GO:0003843;GO:0006075;GO:0006075;GO:0016020;GO:0016020;GO:0016020;GO:0016021;GO:0016021;	-	-	-	-	-
Bo3g168660	0.11044866418421601	-3.1785521246908801	1.84141e-13	8.06235e-12	2.30233809707943	1.20309970799822	0.0047224	0.0308718	C3	59410621	59411776	-	354	-	GO:0005747;GO:0005747;GO:0006120;GO:0006120;	K03965	-	-	106331966	A0A0D3BLC2
Bo7g111180	0	-Inf	2.77405e-13	1.19351e-11	Inf	Inf	0.0020996	0.0163084	C7	44181926	44183527	-	1140	-	GO:0080048;GO:0080048;	-	-	-	-	-
Bo7g033020	0.17997954205004699	-2.47409516755638	3.00695e-13	1.28925e-11	0.180485488956688	-2.47004524587348	1.56083e-16	3.08863e-14	C7	12843065	12843511	-	447	-	GO:0003677;GO:0003677;GO:0003713;GO:0003713;GO:0005730;GO:0005730;GO:0009408;GO:0009408;GO:0009414;GO:0009414;GO:0009737;GO:0009737;GO:0043565;GO:0043565;GO:1903506;GO:1903508;	K03627	-	-	106303806	A0A0D3D515
Bo3g068920	0.1830718636593	-2.4495180147206699	4.70199e-13	1.98401e-11	0.28003658024496	-1.83631280096357	7.81925e-09	2.94798e-07	C3	27253137	27255600	+	1743	-	GO:0005509;GO:0005509;GO:0009507;GO:0009507;GO:0015969;GO:0015969;	K00951	EC:2.7.6.5	-	106334911	A0A0D3BBT1
Bo9g091250	9.1275824123071003E-2	-3.4536234000625199	5.16918e-13	2.1762e-11	2.24787593070188	1.16856240962435	0.00880212	0.0497674	C9	28180571	28182768	-	660	-	GO:0004476;GO:0004476;GO:0005975;GO:0005975;GO:0008270;GO:0008270;GO:0009298;GO:0009298;	-	-	-	-	-
Bo8g077570	2.90798231383524E-2	-5.1038376948706503	6.08195e-13	2.529e-11	3.46939793779249	1.79468532634177	0.00311048	0.0222008	C8	25534024	25536506	+	1065	-	GO:0004601;GO:0004601;GO:0004601;GO:0005576;GO:0005576;GO:0006979;GO:0006979;GO:0006979;GO:0016491;GO:0020037;GO:0020037;GO:0020037;GO:0042744;GO:0042744;GO:0042744;GO:0046872;GO:0046872;GO:0055114;GO:0055114;GO:0055114;GO:0098869;	K00430	EC:1.11.1.7	-	106310991	A0A0D3DRJ8
Bo3g016930	0	-Inf	1.29713e-12	5.22445e-11	Inf	Inf	0.0298789	0.126468	C3	5466109	5469601	-	1182	-	-	-	-	-	-	-
Bo5g150040	4.4381790618063001E-2	-4.4938883144055097	1.64578e-12	6.54375e-11	0.360123434696029	-1.4734366102726	0.00799999	0.0462072	C5	46138319	46145984	+	4671	-	GO:0003676;GO:0003676;GO:0003723;GO:0003723;GO:0004525;GO:0004525;GO:0005515;GO:0005524;GO:0005524;GO:0006396;GO:0006396;GO:0016891;GO:0016891;GO:0031047;GO:0031047;GO:0090501;GO:0090502;	-	-	-	-	-
Bo6g101340	0.104446046339129	-3.2591702126775401	1.72315e-12	6.82221e-11	0.397647084157257	-1.33043950283011	0.0365834	0.14649	C6	32197409	32202424	-	3561	-	GO:0005515;GO:0007165;GO:0007165;GO:0043531;GO:0043531;	-	-	-	-	-
Bo6g119350	0.14269091397894401	-2.80903462254639	1.9073e-12	7.51928e-11	2.34652941949011	1.23052854819333	0.0011346	0.00992298	C6	37340879	37343634	-	1932	-	GO:0003824;GO:0003824;GO:0008033;GO:0008033;GO:0010181;GO:0010181;GO:0051536;GO:0051536;GO:0051539;GO:0051539;GO:0055114;GO:0055114;	K15449	EC:4.1.3.44	-	106300204	A0A0D3D0U0
Bo2g076910	9.1930734834042696E-2	-3.4433089171651301	1.98963e-12	7.81076e-11	3.36008106250683	1.74849603867841	0.0231577	0.10445	C2	21724884	21729023	-	420	-	-	-	-	-	-	-
Bo6g070060	0.18977454352262599	-2.39764161357563	2.48207e-12	9.67255e-11	2.46649045346824	1.30245970340349	0.000348799	0.00372079	C6	20337821	20338765	-	492	-	GO:0030001;GO:0030001;GO:0046872;GO:0046872;GO:0046872;	-	-	-	-	-
Bo2g032420	4.8569958185898897E-2	-4.36379194543537	2.97431e-12	1.15304e-10	4.02407956954383	2.00865883234308	0.00832549	0.0476106	C2	9214658	9215419	-	762	-	GO:0008380;GO:0008380;	-	-	-	-	-
Bo1g055190	3.5189994854317903E-2	-4.8286908866462497	3.55858e-12	1.35971e-10	3.13125985042484	1.64674323679462	0.0275662	0.119243	C1	16154240	16156041	-	762	-	GO:0016020;GO:0016021;GO:0016021;	-	-	-	-	-
Bo9g172200	0.152462020051741	-2.7134781984890002	4.08366e-12	1.54136e-10	0.162622579182042	-2.62040051390468	3.45808e-08	1.15475e-06	C9	50923137	50924003	-	867	-	GO:0002238;GO:0002238;GO:0004842;GO:0004842;GO:0005886;GO:0005886;GO:0009617;GO:0009617;GO:0010200;GO:0010200;GO:0016020;GO:0016021;GO:0016021;GO:0016567;GO:0043068;GO:0043068;GO:0051865;GO:0051865;	K10664	EC:2.3.2.27	-	106315898	A0A0D3EGH4
Bo3g070230	0.19084969799144999	-2.3894911913131001	7.32101e-12	2.70209e-10	0.235989634882183	-2.08320459984459	3.27538e-09	1.33442e-07	C3	27454753	27456481	-	1464	-	-	-	-	-	-	-
Bo3g064760	0.19281859979103499	-2.3746838704355899	7.56891e-12	2.7807e-10	0.368673983103752	-1.43958248418264	8.50957e-05	0.0011403	C3	24867136	24871181	+	2277	-	GO:0005515;	-	-	-	-	-
Bo3g045750	0.11644553877648101	-3.1022727263419001	8.36427e-12	3.05481e-10	5.7690634743424	2.52833713679387	0.0375468	0.149293	C3	19330914	19331315	-	402	-	-	-	-	-	106341735	A0A0D3B8A3
Bo4g117120	5.7310157197054602E-2	-4.1250653363215601	1.17781e-11	4.23921e-10	0.0969502407192806	-3.36661170934796	0.0250815	0.11106	C4	30177066	30180694	-	1944	-	GO:0016788;GO:0016788;	-	-	-	-	-
Bo9g033770	5.5883792114494402E-2	-4.1614262685414403	1.69582e-11	5.99351e-10	2.91329346579216	1.54265103629391	0.0154676	0.0770085	C9	11449908	11455531	-	2847	-	GO:0002679;GO:0002679;GO:0004601;GO:0004601;GO:0005509;GO:0005509;GO:0005886;GO:0005886;GO:0007231;GO:0007231;GO:0009723;GO:0009723;GO:0010119;GO:0010119;GO:0016020;GO:0016020;GO:0016020;GO:0016021;GO:0016021;GO:0016174;GO:0016174;GO:0016491;GO:0016491;GO:0016491;GO:0033500;GO:0033500;GO:0043069;GO:0043069;GO:0050664;GO:0050664;GO:0050665;GO:0050665;GO:0052542;GO:0052542;GO:0055114;GO:0055114;GO:…	K13447	-	-	106318844	A0A0D3E4D4
Bo3g158640	0.21175197163605	-2.2395526922422402	2.39318e-11	8.3238e-10	0.289082831309965	-1.79044516548949	0.000983445	0.00883518	C3	56583763	56586115	+	1353	-	-	-	-	-	106328287	A0A0D3BKG3
Bo5g148530	7.9013162787141697E-2	-3.6617631781826399	2.7377e-11	9.43393e-10	4.26855733412591	2.09374855729755	0.000177695	0.00213348	C5	45823945	45826783	+	1605	-	GO:0004672;GO:0004672;GO:0005524;GO:0005524;GO:0006468;GO:0006468;	-	-	-	-	-
Bo9g030600	3.6935838777601697E-2	-4.7588348495257904	2.92289e-11	1.00442e-09	4.77693247340422	2.25608448305297	0.0339028	0.138545	C9	10493407	10494711	-	705	-	GO:0008299;GO:0008685;GO:0008685;GO:0008685;GO:0016114;GO:0016114;GO:0016829;	K01770	EC:4.6.1.12	-	106315633	A0A0D3E415
Bo3g052590	5.86547862991652E-2	-4.0916073511146802	3.44695e-11	1.17259e-09	2.62020143389797	1.38967772646304	0.0278083	0.119957	C3	20751542	20752127	+	492	-	GO:0006950;GO:0006950;	-	-	-	-	-
Bo9g149750	0.21252179269482699	-2.2343173072807501	3.67844e-11	1.24792e-09	0.139806229220234	-2.83849945187839	2.98382e-18	7.97105e-16	C9	44395361	44397161	+	1266	-	GO:0005524;GO:0005524;GO:0006457;GO:0006457;GO:0009408;GO:0009408;GO:0031072;GO:0031072;GO:0046872;GO:0046872;GO:0051082;GO:0051082;	K09503	-	-	106319308	A0A0D3EDG7
Bo3g158650	8.9163228545381499E-5	-13.4531916177979	4.16956e-11	1.40684e-09	12227.5097225676	13.5778429913684	6.51948e-50	6.09572e-46	C3	56605961	56607751	+	1791	-	GO:0009507;GO:0010287;GO:0010287;GO:0016702;GO:0016702;GO:0046872;GO:0046872;GO:0051213;GO:0055114;GO:0055114;GO:0055114;	K09840	EC:1.13.11.51	-	106332377	A0A0D3BKG4
Bo9g094250	2.3886145188522001E-2	-5.3876821432692603	4.20583e-11	1.41651e-09	4.99975609865377	2.32185771811831	0.048607	0.179884	C9	29327223	29328210	+	363	-	-	-	-	-	-	-
Bo5g030670	0.20796122604216	-2.2656135290749599	4.29258e-11	1.44442e-09	0.288378537710724	-1.79396429747399	1.16696e-08	4.2767e-07	C5	10507539	10508135	+	597	-	GO:0016020;GO:0016021;GO:0016021;	-	-	-	106293084	A0A0D3CBV8
Bo9g167830	0.19830318426520999	-2.3342202509729302	4.4981e-11	1.50948e-09	0.323068275020529	-1.63008900852964	0.0151274	0.0757832	C9	49535453	49537674	-	1734	-	-	K14487	-	-	106313262	A0A0D3EFT5
Bo2g011650	0.206285173349671	-2.27728796296784	4.51461e-11	1.51365e-09	3.60779896103616	1.85111894890456	7.11712e-09	2.70508e-07	C2	3170634	3172285	-	1113	-	GO:0016020;GO:0016021;GO:0016021;	K15102	-	-	106319205	A0A0D3AIY2
Bo3g009150	0.218336472841	-2.1953749439832699	5.01001e-11	1.67372e-09	0.295715215892075	-1.7577196163014	0.00163913	0.0133909	C3	3077512	3079639	-	1314	-	GO:0003824;GO:0003824;GO:0004801;GO:0004801;GO:0005737;GO:0005737;GO:0005975;GO:0005975;GO:0006098;GO:0006098;	K00616	EC:2.2.1.2	-	106334704	A0A0D3B0Y2
Bo2g024060	0.17290344852342299	-2.5319614513668198	8.82598e-11	2.86871e-09	2.84538702538436	1.50862489914956	0.00023314	0.00268043	C2	6533639	6534424	-	471	-	GO:0003676;GO:0003676;GO:0008270;GO:0008270;	-	-	-	-	-
Bo9g061240	0.109860890823885	-3.18625019955685	1.22306e-10	3.90036e-09	5.36026451901394	2.42230419673778	7.34064e-08	2.28213e-06	C9	18463976	18471612	-	6627	-	GO:0005515;GO:0007165;GO:0007165;GO:0043531;GO:0043531;	-	-	-	106317711	A0A0D3E6K1
Bo6g118570	0.174001338024175	-2.5228296948281899	1.27051e-10	4.04131e-09	2.92340585252687	1.54765013047219	1.77166e-05	0.000296602	C6	36976530	36977902	+	822	-	GO:0003676;GO:0003676;GO:0003723;GO:0003723;	K12741	-	-	106296455	A0A0D3D0L2
Bo2g034150	6.3728702382971902E-2	-3.97191290427511	1.32079e-10	4.18693e-09	3.72750866826911	1.89821170747969	0.00593726	0.0367882	C2	9939714	9941719	-	1422	-	-	-	-	-	-	-
Bo2g017930	7.5257175185237099E-2	-3.7320270516143998	1.40904e-10	4.4402e-09	3.9478520801528	1.98106793527863	0.00118883	0.0103089	C2	5108697	5110585	-	891	-	GO:0000413;GO:0003755;GO:0003755;GO:0003755;GO:0016853;GO:0016853;	-	-	-	106327874	A0A0D3AJW3
Bo4g025760	0.167115726712392	-2.5810805878056899	1.53853e-10	4.82374e-09	5.10595711447805	2.35218142043409	6.94963e-11	3.92031e-09	C4	4586144	4591830	-	2433	-	GO:0003824;GO:0003824;GO:0004553;GO:0004553;GO:0005975;GO:0005975;GO:0005977;GO:0005983;GO:0005983;GO:0009507;GO:0010021;GO:0010021;GO:0010021;GO:0010368;GO:0010368;GO:0019156;GO:0019156;GO:0019156;GO:0043033;	K01214	EC:3.2.1.68	-	106342923	A0A0D3BQE8
Bo7g095630	0.21534007847630801	-2.2153112401386399	1.55258e-10	4.8637e-09	0.397328097408494	-1.33159727639568	7.11266e-05	0.000983413	C7	36701388	36704473	-	3018	-	GO:0000166;GO:0004672;GO:0004672;GO:0004674;GO:0004674;GO:0005515;GO:0005524;GO:0005524;GO:0005524;GO:0006468;GO:0006468;GO:0016020;GO:0016021;GO:0016021;GO:0016301;GO:0016310;GO:0016740;	K00924	EC:2.7.1.-	-	106306020	A0A0D3DCR2
Bo2g023290	0	-Inf	2.14333e-10	6.58679e-09	Inf	Inf	4.29749e-14	4.87049e-12	C2	5964308	5971014	+	4053	-	GO:0003824;GO:0005506;GO:0005506;GO:0009055;GO:0009055;GO:0016491;GO:0016491;GO:0016614;GO:0016614;GO:0022900;GO:0046872;GO:0046872;GO:0046872;GO:0050660;GO:0050660;GO:0051536;GO:0051536;GO:0051536;GO:0051537;GO:0051537;GO:0051537;GO:0055114;GO:0055114;GO:0071949;	-	-	-	106326885	-
Bo2g051400	0.13880012490773999	-2.8489192286736702	2.83656e-10	8.61757e-09	0.103148750553385	-3.27720174900327	2.03858e-06	4.51141e-05	C2	14779328	14779786	-	459	-	GO:0016020;GO:0016021;GO:0016021;	-	-	-	-	-
Bo5g144990	0.18672000138673001	-2.4210516180148698	3.4274e-10	1.03116e-08	2.18974985123609	1.13076607119921	0.000281109	0.00312343	C5	44839252	44839775	+	189	-	-	-	-	-	-	-
Bo9g095840	2.0302431045463101E-2	-5.62220370141634	4.17669e-10	1.24153e-08	7.96010782703612	2.99278797354237	0.00353784	0.0246031	C9	30589444	30594174	+	1881	-	-	-	-	-	-	-
Bo9g037470	0.183126749661532	-2.4490855512380398	6.47318e-10	1.88208e-08	12.1456682163072	3.60236995956951	6.18976e-24	4.72443e-21	C9	13085909	13086886	-	588	-	-	-	-	-	-	-
Bo1g078300	0.22723655970943801	-2.1377331285822301	8.47529e-10	2.43565e-08	0.395562551690635	-1.33802224373347	3.37042e-05	0.00051725	C1	22752642	22753613	-	972	-	GO:0005829;GO:0005829;GO:0008152;GO:0008152;GO:0016787;GO:0016787;	-	-	-	106320597	A0A0D3A9A0
Bo3g022180	0.18078356988646299	-2.4676645273135498	1.28845e-09	3.61349e-08	0.325466886145411	-1.61941732760706	0.00091789	0.00833028	C3	7612354	7615063	+	1461	-	GO:0016020;GO:0016021;GO:0016021;	-	-	-	-	-
Bo2g055680	0	-Inf	1.54592e-09	4.29672e-08	Inf	Inf	1.26385e-12	1.02091e-10	C2	16052184	16052993	+	300	-	-	-	-	-	-	-
Bo3g153720	6.9699884759565497E-2	-3.8426999190029898	1.6373e-09	4.53038e-08	7.34773766522788	2.87730011912334	1.56754e-06	3.56607e-05	C3	55005862	55007824	+	834	-	-	-	-	-	-	-
Bo9g074360	8.7623244124056705E-3	-6.8344706553122601	1.66706e-09	4.6093e-08	19.2819191590704	4.26917674725811	0.00793627	0.0459539	C9	22277580	22283542	+	1980	-	GO:0004066;GO:0004066;GO:0006529;GO:0006529;	-	-	-	-	-
Bo8g066010	0.17264752414298701	-2.5340984495593499	1.67748e-09	4.63468e-08	0.423669857254908	-1.23898760563753	0.00973427	0.0538553	C8	20992075	20993128	+	723	-	GO:0003676;GO:0003676;GO:0003723;GO:0003723;	-	-	-	106312273	-
Bo7g093580	7.4834640567566302E-3	-7.0620780438741404	1.7089e-09	4.70751e-08	23.6833987832	4.56580423057589	0.00628387	0.0384831	C7	36110650	36112233	+	456	-	-	-	-	-	-	-
Bo9g071620	0.20982741142033401	-2.2527249339552999	1.76411e-09	4.85601e-08	2.78768323752777	1.47906663810352	0.0396175	0.155103	C9	21677156	21677731	+	234	-	GO:0005618;GO:0005618;GO:0006952;GO:0006952;GO:0009506;GO:0009506;	-	-	-	106316032	A0A0D3E7J6
Bo3g034640	7.5852511294616898E-2	-3.7206592443411202	1.91288e-09	5.2384e-08	3.34038014163789	1.7400122934923	0.0118524	0.0627963	C3	13217523	13218817	+	711	-	GO:0018024;GO:0018024;GO:0034968;	-	-	-	106331985	A0A0D3B5Y9
Bo5g008560	0.13138769786223001	-2.92809789581792	1.97643e-09	5.39655e-08	2.74823314973351	1.4585044021531	0.00244883	0.0184464	C5	2920025	2924580	+	2571	-	GO:0016020;GO:0016021;GO:0016021;	-	-	-	-	-
Bo8g112750	0.259195024979327	-1.9478900676622599	2.36991e-09	6.40514e-08	0.360390672543208	-1.47236642238684	2.44848e-07	6.76815e-06	C8	39999045	40000489	-	1350	-	GO:0000166;GO:0003746;GO:0003746;GO:0003746;GO:0003924;GO:0003924;GO:0003924;GO:0005525;GO:0005525;GO:0005525;GO:0005737;GO:0005737;GO:0006414;GO:0006414;GO:0006414;	K03231	-	-	106342228	A0A0D3DYH7
Bo1g126030	0.17006172026283201	-2.5558696581894802	2.52981e-09	6.80763e-08	0.217501040212127	-2.20090579413156	1.21465e-06	2.82857e-05	C1	37348145	37348663	-	432	-	GO:0016020;GO:0016021;GO:0016021;	-	-	-	106316689	A0A0D3ADA7
Bo2g013340	0.21702314487741001	-2.2040791848476902	2.53763e-09	6.8188e-08	6.47730546744329	2.69539378267566	1.66582e-15	2.54292e-13	C2	4120171	4126433	+	3507	-	GO:0004672;GO:0004672;GO:0005524;GO:0005524;GO:0006468;GO:0006468;GO:0006486;GO:0006486;GO:0016020;GO:0016021;GO:0016021;GO:0016757;GO:0016757;	-	-	-	-	-
Bo6g011080	0.14107525513309099	-2.82546313620418	2.70047e-09	7.22507e-08	2.26934696591005	1.18227720298533	0.00978217	0.0540723	C6	2611547	2616905	+	2457	-	GO:0006508;GO:0006508;GO:0008237;GO:0008237;GO:0008270;GO:0008270;	-	-	-	-	-
Bo3g053010	0.16015463570249999	-2.6424625371230901	3.02064e-09	8.01826e-08	0.418874552829667	-1.25540985360865	0.0204147	0.0950086	C3	21010685	21011485	-	297	-	GO:0030001;GO:0030001;GO:0046872;GO:0046872;GO:0046872;	-	-	-	-	-
Bo9g169670	0.13130942634377399	-2.9289576078166899	3.05206e-09	8.08437e-08	2.06019169834226	1.04277858468055	0.0420792	0.16181	C9	50044321	50046885	-	1152	-	GO:0006807;GO:0006807;GO:0016810;	K13566	EC:3.5.1.3	-	106313802	A0A0D3EG20
Bo5g034850	0.11599651363968901	-3.1078466501406998	3.08563e-09	8.16747e-08	3.59998746667956	1.84799188383531	0.000237233	0.00272148	C5	11423329	11424940	+	1251	-	-	-	-	-	106343466	A0A0D3CC79
Bo2g135930	7.8733933617362695E-2	-3.6668706314218298	3.57678e-09	9.36758e-08	9.79284941775503	3.29172870076283	0.00794496	0.0459874	C2	42833902	42834403	+	234	-	GO:0005618;GO:0006952;GO:0006952;GO:0009506;	-	-	-	106324827	A0A0D3AVE4
Bo7g002040	0	-Inf	4.2431e-09	1.09433e-07	Inf	Inf	0.0410629	0.159228	C7	50123	51267	+	192	-	-	-	-	-	-	-
Bo2g044560	0.138504737297928	-2.8519927730580501	5.21375e-09	1.32599e-07	3.17119962493708	1.66502869700717	0.0145425	0.0734884	C2	12015567	12016268	+	702	-	GO:0004013;GO:0004013;GO:0006730;	-	-	-	-	-
Bo7g119470	0.23724117930518801	-2.0755736464575398	5.65888e-09	1.43169e-07	0.430980287702216	-1.2143062104561	0.000494131	0.00500691	C7	48148371	48150360	+	1197	-	GO:0003824;GO:0003824;GO:0004332;GO:0004332;GO:0004332;GO:0006096;GO:0006096;GO:0006096;GO:0016829;	K01623	EC:4.1.2.13	-	106306452	A0A0D3DIE9
Bo8g020580	4.4336693574417399E-2	-4.4953550050826996	6.05128e-09	1.52578e-07	14.6134569520479	3.8692255966174	0.000658995	0.00636365	C8	4931044	4935940	-	1434	-	GO:0006629;GO:0006629;GO:0016020;GO:0016021;GO:0016021;GO:0016787;GO:0016787;	-	-	-	106312035	A0A0D3DK64
Bo3g150080	1.62273703179814E-2	-5.9454269629381304	6.94482e-09	1.72998e-07	5.1189992097529	2.35586178361281	0.00866504	0.0491689	C3	53635370	53636115	-	327	-	-	K02975	-	-	106332268	A0A0D3DID4
Bo7g109030	0.13679087473805501	-2.8699561030353302	9.56814e-09	2.34114e-07	2.32251912496523	1.2156904766419	0.000938836	0.00848332	C7	43064941	43065512	+	333	-	GO:0006811;GO:0015992;GO:0015992;GO:0016471;GO:0016471;GO:0042626;GO:0042626;GO:0055085;GO:1902600;GO:1902600;	K02152	-	-	106303787	A0A0D3DFQ4
Bo5g019690	9.9781724680671702E-2	-3.3250805839005402	9.59055e-09	2.34508e-07	0.249466797810658	-2.00308027860891	0.0365373	0.146432	C5	6618757	6623733	+	2412	-	GO:0005515;GO:0016020;GO:0016021;GO:0016021;	-	-	-	-	-
Bo8g106200	0.18173107756342399	-2.4601229410676999	1.03267e-08	2.51189e-07	0.0671907560355825	-3.89559342610054	0.0105211	0.0572724	C8	37496022	37499797	-	1440	-	GO:0006855;GO:0006855;GO:0015238;GO:0015238;GO:0015297;GO:0015297;GO:0016020;GO:0016020;GO:0016020;GO:0016021;GO:0016021;GO:0055085;GO:0055085;	K03327	-	-	106312218	A0A0D3DX70
Bo9g027420	7.8394838386313406E-2	-3.6730975211435699	1.07629e-08	2.6028e-07	4.93755309872117	2.30379626308339	0.00594126	0.0368046	C9	8605669	8609161	-	912	-	GO:0005515;	-	-	-	-	-
Bo2g083700	0.240831796912687	-2.0539022118437198	1.09176e-08	2.63666e-07	2.32528168037549	1.21740549224899	0.00589418	0.0366062	C2	23285173	23286819	-	957	-	GO:0004518;GO:0004518;GO:0004518;GO:0004518;GO:0005515;GO:0043565;GO:0043565;GO:0050832;GO:0050832;GO:0090305;	-	-	-	106327783	A0A0D3AQN6
Bo8g108890	9.8862980437885405E-3	-6.6603538843735404	1.46164e-08	3.45154e-07	31.5847370410502	4.981155655988	0.00625912	0.0383585	C8	38882287	38882989	-	540	-	GO:0016020;GO:0016021;GO:0016021;	-	-	-	106310735	A0A0D3DXY9
Bo1g147290	0.19085831431603301	-2.3894260591788599	1.4747e-08	3.47797e-07	2.44297453080765	1.28863882288923	0.000958836	0.00863483	C1	41614647	41616185	-	750	-	GO:0003677;GO:0003677;	-	-	-	106341773	A0A0D3AF48
Bo6g120190	2.93638898844104E-2	-5.0898130926691403	1.48346e-08	3.49642e-07	7.49305533002801	2.90555410462317	0.00903554	0.0507844	C6	37856845	37858925	-	996	-	GO:0000049;GO:0000049;GO:0002098;GO:0002098;GO:0008033;GO:0008033;GO:0034227;GO:0034227;	-	-	-	-	-
Bo1g037270	2.0475673801005199E-2	-5.6099452617973702	1.4961e-08	3.52175e-07	2.64695153562417	1.40433178004118	0.0263769	0.115268	C1	11210391	11211383	+	375	-	-	-	-	-	-	-
Bo2g013560	0.12629211411476499	-2.9851635371768701	1.51556e-08	3.56305e-07	0.303207575664154	-1.7216222950836	0.0341807	0.139366	C2	4233053	4234905	-	1107	-	GO:0003677;GO:0003677;GO:0003677;GO:0005634;GO:0005634;GO:0006351;GO:0006351;GO:0006355;GO:0006355;	-	-	-	106325258	A0A0D3AJH3
Bo9g061230	0.15568917222841699	-2.6832594826191598	1.57575e-08	3.68825e-07	3.06922390097236	1.61787389475844	0.000222841	0.00257468	C9	18461446	18462368	-	795	-	GO:0003677;GO:0003677;GO:0003677;GO:0005634;GO:0005634;GO:0006351;GO:0006351;GO:0006355;GO:0006355;GO:0006355;	-	-	-	106315743	A0A0D3E6K0
Bo8g085910	0.21091850348382901	-2.2452424292797999	1.90844e-08	4.41421e-07	4.17535099445117	2.06189748062131	0.00431525	0.028712	C8	29291427	29293768	-	2115	-	GO:0004842;GO:0004842;GO:0005488;GO:0005515;GO:0016567;GO:0016567;GO:0016567;GO:0016740;	-	-	-	106307589	A0A0D3DT35
Bo5g137490	7.1107397250028695E-2	-3.8138565396232198	1.99926e-08	4.60709e-07	0.420107432376063	-1.25116978524185	0.0350684	0.142051	C5	42877553	42880309	+	1695	-	GO:0004180;GO:0004185;GO:0004185;GO:0004185;GO:0006508;GO:0006508;GO:0006508;GO:0008233;GO:0016787;	-	-	-	-	-
Bo5g003500	0	-Inf	2.12803e-08	4.87066e-07	Inf	Inf	0.0156494	0.0776897	C5	811100	811468	-	369	-	-	-	-	-	106293670	A0A0D3C781
Bo1g101510	0.20414950514288099	-2.2923020244037899	2.55415e-08	5.74353e-07	4.29753554679672	2.10350957291456	6.89019e-09	2.6349e-07	C1	30191962	30199343	-	3153	-	GO:0003824;GO:0003824;GO:0004553;GO:0004553;GO:0005975;GO:0005975;GO:0008152;GO:0016787;GO:0016798;GO:0030246;GO:0030246;	-	-	-	106313535	A0A0D3AB38
Bo3g162350	0.22833175085566801	-2.1307966062532699	2.82481e-08	6.29732e-07	3.87191925910226	1.95304886849389	0.00200229	0.0156894	C3	57239953	57241996	+	1341	-	GO:0000166;GO:0003924;GO:0003924;GO:0003924;GO:0005200;GO:0005200;GO:0005525;GO:0005525;GO:0005525;GO:0005737;GO:0005737;GO:0005856;GO:0005874;GO:0005874;GO:0005874;GO:0007010;GO:0007017;GO:0007017;	K07375	-	-	106328101	A0A0D3BKN7
Bo9g062860	0.19574777293875301	-2.3529322011053702	2.85343e-08	6.35128e-07	2.12956573709493	1.09055926481057	0.00137111	0.0115625	C9	18999393	19000930	-	486	-	-	-	-	-	106315796	A0A0D3E6R4
Bo1g006890	0.27180202175684898	-1.8793719074806201	3.26596e-08	7.18357e-07	3.7868817536971	1.92101037342244	2.0026e-07	5.60188e-06	C1	2183314	2183832	-	519	-	GO:0000413;GO:0000413;GO:0003755;GO:0003755;GO:0003755;GO:0005774;GO:0005774;GO:0005794;GO:0005794;GO:0005829;GO:0005829;GO:0005886;GO:0005886;GO:0006457;GO:0006457;GO:0009507;GO:0009507;GO:0016853;GO:0048046;GO:0048046;	K01802	EC:5.2.1.8	-	106341430	A0A0D3A1W3
Bo7g101250	0.215051295682508	-2.21724727135138	3.53357e-08	7.72197e-07	0.448932722118148	-1.15542883864934	0.0050827	0.0326284	C7	39433989	39434357	+	369	-	-	-	-	-	-	-
Bo7g114570	0.29118688443165902	-1.77998271940409	3.83393e-08	8.34894e-07	0.366970147856975	-1.44626538683352	0.000100556	0.00131589	C7	45553238	45554639	+	753	-	GO:0006541;	K22314	EC:3.4.19.16	-	106306103	A0A0D3DH09
Bo8g117670	0.19433573913455901	-2.3633768520660299	3.9372e-08	8.53886e-07	2.08108587082836	1.05733649552124	0.0105114	0.05724	C8	41394319	41395005	-	345	-	GO:0003735;GO:0003735;GO:0005622;GO:0005622;GO:0005840;GO:0005840;GO:0005840;GO:0006414;GO:0006414;GO:0030529;	K02942	-	-	106309974	A0A0D3DZC1
Bo7g111560	7.0478990753841703E-2	-3.8266629244955799	4.33816e-08	9.3377e-07	3.54703006171013	1.82661155742177	0.000380403	0.00399525	C7	44373914	44375859	+	408	-	-	-	-	-	-	-
Bo1g003050	0.13277066763102699	-2.9129916405024301	5.68031e-08	1.20592e-06	2.62674668741377	1.39327707963684	0.00903185	0.0507844	C1	517217	520472	-	2211	-	GO:0003723;GO:0003723;GO:0003723;GO:0008168;GO:0008168;GO:0008168;GO:0016428;GO:0016428;GO:0016740;GO:0030488;GO:0032259;	K15334	EC:2.1.1.202	-	106292165	A0A0D3A128
Bo9g160370	1.8190606665006999E-2	-5.7806625314471098	5.95898e-08	1.26077e-06	8.49403943959489	3.08645080743453	0.0482642	0.178945	C9	47452872	47455055	+	438	-	GO:0016020;GO:0016021;GO:0016021;	-	-	-	-	-
Bo6g115930	0.12678027372446801	-2.9795978069321101	5.9964e-08	1.26797e-06	3.16295706434707	1.66127397208231	0.00197006	0.0154953	C6	36156502	36158714	-	1536	-	GO:0016020;GO:0016021;GO:0016021;GO:0016021;	-	-	-	106300855	A0A0D3D047
Bo7g005220	1.8328990915081399E-2	-5.7697288278947996	6.77464e-08	1.42202e-06	22.0259914828521	4.4611350572884	9.11479e-05	0.00120841	C7	1247405	1249045	-	1641	-	GO:0001510;GO:0003723;GO:0003723;GO:0006396;GO:0006396;GO:0008168;GO:0008168;GO:0008173;GO:0008173;GO:0009507;GO:0009507;GO:0032259;	K15507	EC:2.1.1.-	-	106301308	A0A0D3D2G6
Bo2g149830	0.143940009118878	-2.7964604400247	6.93285e-08	1.45196e-06	3.18171447621686	1.66980437550924	0.000613438	0.00599336	C2	47149932	47150342	+	411	-	GO:0000786;GO:0000786;GO:0000786;GO:0003677;GO:0003677;GO:0003677;GO:0005634;GO:0005634;GO:0005694;GO:0010369;GO:0046982;GO:0046982;	-	-	-	-	-
Bo4g170700	0.29450947778081599	-1.7636140318762401	6.96465e-08	1.4578e-06	0.31579785616121	-1.66292671759703	1.17408e-07	3.47394e-06	C4	45531103	45534248	+	1479	-	GO:0000166;GO:0004672;GO:0004672;GO:0004674;GO:0004674;GO:0005524;GO:0005524;GO:0005524;GO:0006468;GO:0006468;	-	-	-	-	-
Bo2g001190	0.184391061236585	-2.4391593752493099	7.65512e-08	1.59158e-06	2.68217390448865	1.42340278049729	0.000734216	0.00693426	C2	201681	203431	+	1677	-	GO:0008152;GO:0008152;GO:0008168;GO:0008168;GO:0016020;GO:0016021;GO:0016021;GO:0032259;	-	-	-	-	-
Bo9g018840	0.13390225938946701	-2.9007477908160402	8.44595e-08	1.74141e-06	4.64052887427894	2.21428923656375	0.0138664	0.0708813	C9	5950031	5950959	-	426	-	GO:0016020;GO:0016021;GO:0016021;	-	-	-	106315760	A0A0D3E2D3
Bo9g006380	3.7794147734024001E-2	-4.7256933333376896	8.8969e-08	1.8273e-06	27.7062850775386	4.79214137880293	1.44867e-11	9.34144e-10	C9	1460947	1461351	+	405	-	GO:0004553;GO:0004553;GO:0005618;GO:0005618;GO:0005975;GO:0005975;GO:0006073;GO:0006073;GO:0016762;GO:0016762;GO:0048046;GO:0048046;	-	-	-	-	-
Bo3g003790	0.29794857592365498	-1.746864742931	9.4298e-08	1.9293e-06	0.3981373894821	-1.32866173215574	1.07876e-05	0.000194157	C3	1338694	1343733	+	2652	-	-	-	-	-	106335565	A0A0D3AZZ4
Bo7g118890	8.9930354563197507E-2	-3.4750480330311002	9.44179e-08	1.93069e-06	2.83516307600672	1.50343172006339	0.0416596	0.160807	C7	47787384	47787920	-	537	-	GO:0003735;GO:0003735;GO:0005622;GO:0005622;GO:0005840;GO:0005840;GO:0006412;GO:0006412;	K02892	-	-	106303973	A0A0D3DI91
Bo3g018120	9.2619241712029898E-2	-3.4325442442508498	1.00241e-07	2.03633e-06	3.52265393436041	1.81666275138546	0.00669023	0.0403507	C3	5991153	6018703	-	12678	-	GO:0000166;GO:0004672;GO:0004672;GO:0004674;GO:0004674;GO:0005515;GO:0005524;GO:0005524;GO:0005524;GO:0006468;GO:0006468;GO:0016020;GO:0016021;GO:0016021;GO:0016301;GO:0016310;GO:0016740;	-	-	-	-	-
Bo1g040530	0.10607086880932901	-3.2368996044685399	1.03051e-07	2.08772e-06	3.84569165779803	1.94324309403541	1.55033e-05	0.000264638	C1	12679361	12680610	+	864	-	GO:0004553;GO:0004553;GO:0005576;GO:0005618;GO:0005618;GO:0005618;GO:0005618;GO:0005794;GO:0005794;GO:0005975;GO:0005975;GO:0006073;GO:0006073;GO:0008152;GO:0010411;GO:0010411;GO:0016740;GO:0016762;GO:0016762;GO:0016762;GO:0016787;GO:0016798;GO:0042546;GO:0042546;GO:0048046;GO:0048046;GO:0048046;GO:0071555;GO:0071555;	K08235	EC:2.4.1.207	-	106307545	A0A0D3A6E5
Bo4g045760	0.16482348678144801	-2.6010062586234399	1.24908e-07	2.50867e-06	2.28012843405622	1.1891150901608	0.0116523	0.0619639	C4	10623409	10623822	-	414	-	-	-	-	-	106339377	A0A0D3BSR0
Bo3g022470	0.12590024501563199	-2.9896470041855299	1.28257e-07	2.57315e-06	2.66720957770506	1.41533119003189	0.0385775	0.152146	C3	7793649	7794948	-	1227	-	-	-	-	-	106328883	A0A0D3B3L8
Bo7g083840	0.19398385543743199	-2.36599150767892	1.39678e-07	2.79026e-06	6.12378005614301	2.6144224674213	1.04792e-11	6.9122e-10	C7	32806123	32807754	+	1134	-	GO:0000166;GO:0004672;GO:0004672;GO:0004674;GO:0004674;GO:0005524;GO:0005524;GO:0005524;GO:0006468;GO:0006468;GO:0016020;GO:0016021;GO:0016021;GO:0016301;GO:0016310;GO:0016740;	-	-	-	106301974	A0A0D3DB27
Bo1g022050	0.272313822606159	-1.8766578796770499	1.5614e-07	3.09256e-06	2.60025152683272	1.37865118439327	2.07453e-05	0.000338514	C1	8050660	8060094	-	7083	-	GO:0000398;GO:0000398;GO:0003723;GO:0003723;GO:0005515;GO:0005681;GO:0005681;GO:0017070;GO:0017070;GO:0030623;GO:0030623;	K12856	-	-	106305874	A0A0D3A4I5
Bo5g007670	0.26022542873286503	-1.94216614853379	1.56994e-07	3.10782e-06	4.27198655901616	2.09490710787022	0.000132501	0.00165792	C5	2477285	2478912	-	1098	-	GO:0004672;GO:0004672;GO:0004713;GO:0004713;GO:0005524;GO:0005524;GO:0006468;GO:0006468;GO:0018108;	K13436	EC:2.7.11.1	-	106292479	A0A0D3C849
Bo1g057530	0.27741644503687801	-1.8498747828208999	1.77458e-07	3.48511e-06	0.101267090323076	-3.30376269016231	1.62296e-17	3.81753e-15	C1	17442838	17443758	+	561	-	GO:0009535;GO:0009535;GO:0010030;GO:0010030;GO:0010114;GO:0010117;GO:0010117;GO:0010218;GO:0010224;GO:0010224;GO:0010380;GO:0010380;GO:0016020;GO:0016021;GO:0016021;GO:0034605;GO:0034605;GO:0071483;GO:0071483;GO:0071486;GO:0071486;GO:0071490;GO:0071490;GO:0071491;GO:0071491;GO:0071492;GO:0071492;	-	-	-	-	-
Bo00615s010	0.18788228022638201	-2.4120990868574901	1.79751e-07	3.52827e-06	2.14030456830426	1.09781610873723	0.0113789	0.0608743	Scaffold00615	27479	30246	-	1518	-	GO:0005975;GO:0006004;GO:0006004;GO:0016740;GO:0016757;GO:0016757;	-	-	-	106319760	-
Bo9g158600	0.23941241726812201	-2.0624301144248101	2.02662e-07	3.94883e-06	0.450395633454477	-1.15073525420125	0.00782081	0.0454401	C9	46976013	46979168	-	3156	-	GO:0005783;GO:0005783;GO:0005886;GO:0005886;GO:0009506;GO:0009506;GO:0016020;GO:0016021;GO:0016021;	-	-	-	-	-
Bo8g101080	0.220630107118787	-2.18029842078833	2.13193e-07	4.13024e-06	2.93290147797592	1.55232860889819	3.72508e-05	0.000564955	C8	35370548	35372099	+	1059	-	GO:0005634;GO:0005634;	K18810	-	-	106307724	-
Bo8g007130	0.32033300780462798	-1.6423556307038401	2.1506e-07	4.16424e-06	0.172692224696023	-2.5337249665371	1.31026e-13	1.29983e-11	C8	1369566	1371983	-	2085	-	GO:0000166;GO:0004222;GO:0004222;GO:0005524;GO:0005524;GO:0005524;GO:0006508;GO:0006508;GO:0008270;GO:0008270;GO:0016020;GO:0016020;GO:0016021;GO:0016021;	K03798	EC:3.4.24.-	-	106311409	-
Bo2g149570	0.132255796064326	-2.91859714555352	2.23072e-07	4.31042e-06	3.38096758356202	1.75743618385669	0.00108296	0.00956381	C2	46955670	46956450	+	405	-	-	K03946	-	-	106325630	A0A0D3AWR7
Bo4g011450	4.1510500457132102E-2	-4.59037986436969	2.50542e-07	4.81373e-06	7.61339810445364	2.92854051867299	0.00269576	0.0198937	C4	1180236	1181559	-	1206	-	GO:0006629;GO:0006629;GO:0016020;GO:0016021;GO:0016021;GO:0016021;GO:0016491;GO:0016491;GO:0055114;	-	-	-	-	-
Bo6g082070	0.284730699743934	-1.8123300416366801	2.67468e-07	5.12305e-06	3.42408190034381	1.77571720986019	4.58877e-07	1.18715e-05	C6	25735799	25737026	-	273	-	-	K12162	-	-	106300834	A0A0D3CW41
Bo6g068340	0.306876982970751	-1.7042676530557099	2.87045e-07	5.45313e-06	2.97866257074614	1.57466470127007	3.41035e-07	9.07163e-06	C6	19598161	19599490	-	726	-	GO:0009507;GO:0009522;GO:0009522;GO:0009523;GO:0009523;GO:0009535;GO:0009535;GO:0009536;GO:0009579;GO:0009765;GO:0009765;GO:0015979;GO:0016020;GO:0016020;GO:0016020;GO:0016021;GO:0016021;GO:0016168;GO:0016168;GO:0018298;GO:0018298;	K08907	-	-	106301100	A0A0D3CTW2
Bo6g118330	0.138273049483562	-2.8544081037302198	3.32048e-07	6.24431e-06	2.64322444807706	1.40229893590617	0.0124113	0.0650648	C6	36866766	36869218	-	1437	-	GO:0000015;GO:0000015;GO:0000287;GO:0000287;GO:0004634;GO:0004634;GO:0004634;GO:0006096;GO:0006096;GO:0009507;GO:0009570;GO:0009570;GO:0009735;GO:0009735;GO:0010090;GO:0010090;GO:0046872;GO:0046872;	K01689	EC:4.2.1.11	-	106296440	A0A0D3D0I8
Bo8g001090	0.21461857247019001	-2.22015316673677	3.43628e-07	6.4393e-06	3.38601225846357	1.7595871962674	0.000172035	0.00207551	C8	75741	76238	+	498	-	-	-	-	-	-	-
Bo2g137060	0.13140699077072801	-2.9278860667006099	3.93469e-07	7.34003e-06	2.39236723866205	1.2584388664299	0.0397733	0.15555	C2	43870591	43871019	+	336	-	-	K18635	-	-	106322448	A0A0D3AVQ7
Bo8g106950	0.262938315044696	-1.9272037098833401	4.82509e-07	8.8502e-06	0.370064729652323	-1.4341504539276	0.000278558	0.00309969	C8	37900377	37900958	+	582	-	-	-	-	-	106312436	A0A0D3DXE5
Bo2g070720	2.2452955407720201E-2	-5.4769508351674299	4.89698e-07	8.96881e-06	11.1209117736826	3.47520317048883	0.00862424	0.0489999	C2	20516268	20519122	-	2439	-	GO:0016020;GO:0016021;GO:0016021;GO:0046983;GO:0046983;	-	-	-	-	-
Bo6g026140	0.19027507237409799	-2.3938415260126402	5.33176e-07	9.68407e-06	5.16023409361474	2.36743651488041	5.94666e-09	2.31672e-07	C6	5671782	5672788	+	333	-	-	-	-	-	-	-
Bo3g099080	7.5212391898420702E-2	-3.7328858116808301	5.69782e-07	1.02887e-05	2.28234518819085	1.19051700531181	0.0250377	0.110968	C3	35307853	35310244	+	1368	-	GO:0000166;GO:0004672;GO:0004672;GO:0004674;GO:0004674;GO:0005524;GO:0005524;GO:0005524;GO:0006468;GO:0006468;	-	-	-	106334627	A0A0D3BER7
Bo3g027220	8.0202325207116801E-2	-3.6402121262098799	5.99946e-07	1.08124e-05	3.15818843757622	1.65909725411334	0.0285266	0.122369	C3	10136703	10146144	-	5142	-	GO:0000166;GO:0003774;GO:0003774;GO:0003774;GO:0003777;GO:0003777;GO:0003779;GO:0003779;GO:0005515;GO:0005524;GO:0005524;GO:0005524;GO:0007018;GO:0007018;GO:0008017;GO:0008017;GO:0016459;GO:0016459;GO:0016459;	-	-	-	-	-
Bo6g119110	0.23674358915310201	-2.0786027358135701	6.26711e-07	1.12355e-05	2.1531358832684	1.10643937010032	0.0022688	0.0173686	C6	37243740	37246275	-	1248	-	GO:0009058;GO:0009058;GO:0016779;GO:0016779;	K00966	EC:2.7.7.13	-	106298205	A0A0D3D0R6
Bo9g175810	8.0797640679305296E-2	-3.6295430234060899	6.26742e-07	1.12355e-05	5.50804030034766	2.46153911519165	0.00049884	0.00504677	C9	52185612	52187306	-	1695	-	GO:0003690;GO:0003690;GO:0005739;GO:0006355;GO:0006355;GO:0009536;	-	-	-	106319015	A0A0D3EH86
Bo00578s110	0.30544667820201499	-1.7110075440011701	6.43986e-07	1.15224e-05	3.30928589634829	1.72651993457178	4.50238e-08	1.47193e-06	Scaffold00578	128558	130804	-	1614	-	-	-	-	-	106319712	A0A0D2ZPT6
Bo7g084390	0.15111638777112399	-2.7262679732719102	7.80882e-07	1.37536e-05	2.0497793435659	1.03546861359557	0.0341929	0.139396	C7	33148072	33149207	+	837	-	GO:0016020;GO:0016020;	K17080	-	-	106301647	A0A0D3DB82
Bo03447s010	0.226721613169696	-2.14100616641805	8.23043e-07	1.44007e-05	2.42133117812604	1.27580041777706	0.00124482	0.0107001	Scaffold03447	623	1135	+	513	-	-	-	-	-	106321872	A0A0D2ZWQ0
Bo4g169180	0.26752497407230702	-1.9022545181830099	8.64422e-07	1.51034e-05	3.14440878352031	1.65278878490605	0.000414063	0.00431123	C4	45174686	45178830	+	2181	-	GO:0016020;GO:0016021;GO:0016021;	-	-	-	-	-
Bo2g133790	0.32655907063817202	-1.6145841131966201	8.79689e-07	1.53414e-05	0.205724237479274	-2.2812163193462	9.96859e-14	1.03276e-11	C2	41663885	41664343	+	459	-	-	K16282	EC:2.3.2.27	-	106325081	A0A0D3AV29
Bo9g061260	7.8857455542099705E-2	-3.6646090293672602	9.04438e-07	1.57508e-05	5.82851398285193	2.54312810592257	8.07711e-05	0.00109292	C9	18478429	18482296	+	3510	-	GO:0005515;GO:0005634;GO:0005634;GO:0007165;GO:0007165;GO:0009626;GO:0009626;GO:0009870;GO:0009870;GO:0012505;GO:0012505;GO:0042742;GO:0042742;GO:0042802;GO:0042802;GO:0043531;GO:0043531;	K16226	-	-	106317712	A0A0D3E6K3
Bo4g187810	0.22112991304313301	-2.1770338979559298	9.40843e-07	1.63542e-05	4.49607488375215	2.16866606436626	1.46801e-08	5.27413e-07	C4	50344530	50350866	-	4470	-	GO:0000398;GO:0000398;GO:0005634;GO:0005681;GO:0005681;GO:0006397;GO:0008380;	K12874	-	-	106341867	A0A0D3C515
Bo9g169590	0.17285276006931499	-2.53238445451227	9.57388e-07	1.66031e-05	2.02237121549661	1.0160478348283	0.0447073	0.169271	C9	50003062	50008896	+	2493	-	GO:0005096;GO:0005096;GO:0005737;GO:0005737;GO:0005886;GO:0005886;GO:0007165;GO:0007165;GO:0009920;GO:0009920;GO:0043547;	-	-	-	106318068	A0A0D3EG12
Bo9g013690	0.14227953825529599	-2.81319989739545	9.62637e-07	1.66863e-05	3.22738775359579	1.69036692042891	0.0124349	0.0651716	C9	3891303	3892127	+	825	-	GO:0004553;GO:0004553;GO:0005975;GO:0005975;GO:0008152;GO:0016787;GO:0016798;	-	-	-	-	-
Bo9g014340	2.84729772756716E-2	-5.1342628334606104	1.06411e-06	1.83513e-05	14.9733842942904	3.9043284320335	0.000114726	0.00147347	C9	4275651	4276442	-	711	-	GO:0000166;GO:0004797;GO:0004797;GO:0004797;GO:0005524;GO:0005524;GO:0005524;GO:0009157;GO:0016301;GO:0016310;GO:0016740;GO:0071897;GO:0071897;	-	-	-	-	-
Bo2g055820	0.32227856279957101	-1.63361986792749	1.08219e-06	1.86285e-05	0.43878089435411	-1.18842738642216	4.48206e-05	0.000664666	C2	16239327	16240123	-	705	-	-	-	-	-	106327772	A0A0D3ANM7
Bo8g102500	0.11893134997266901	-3.07179903927788	1.09855e-06	1.88926e-05	3.01301503312669	1.59120787112793	0.0121913	0.0641645	C8	36132975	36138075	+	3000	-	GO:0001172;GO:0003723;GO:0003723;GO:0003968;GO:0003968;GO:0003968;GO:0016740;GO:0016779;GO:0031047;GO:0031047;	K11699	EC:2.7.7.48	-	106312177	A0A0D3DWE9
Bo7g108280	7.8491263011780596E-2	-3.67132411552946	1.141e-06	1.95055e-05	4.05252324177574	2.01882045982016	0.00352826	0.0245775	C7	42549931	42551722	-	1245	-	GO:0016020;GO:0016020;GO:0016020;GO:0016021;GO:0016021;	-	-	-	106301507	A0A0D3DFH9
Bo8g051550	0.218314738185336	-2.1955185665322299	1.14859e-06	1.96262e-05	2.36774406631847	1.2435131459128	0.00299713	0.0215771	C8	17355770	17361057	+	2976	-	GO:0003994;GO:0003994;GO:0003994;GO:0005507;GO:0005507;GO:0005739;GO:0005739;GO:0006101;GO:0006101;GO:0006102;GO:0006102;GO:0006979;GO:0006979;GO:0008152;GO:0008152;GO:0009507;GO:0009507;GO:0016829;GO:0046686;GO:0046686;GO:0051536;GO:0051539;GO:0051539;GO:1990641;GO:1990641;	K01681	EC:4.2.1.3	-	106311729	A0A0D3DN32
Bo1g085960	0.230558129066425	-2.11679756139922	1.28413e-06	2.17563e-05	0.252725208320429	-1.98435852041459	1.07114e-10	5.82274e-09	C1	24775093	24776694	+	573	-	GO:0016020;GO:0016021;GO:0016021;GO:0042335;GO:0042335;GO:0046658;GO:0046658;	-	-	-	106319803	A0A0D3A9S2
Bo6g110660	0.21588144990888899	-2.2116888129638101	1.32349e-06	2.23379e-05	2.49171065365555	1.31713654718514	0.00159967	0.0131172	C6	34675120	34676916	-	1797	-	GO:0004672;GO:0004672;GO:0005515;GO:0005524;GO:0005524;GO:0006468;GO:0006468;GO:0016020;GO:0016021;GO:0016021;	-	-	-	106298811	A0A0D3CZG7
Bo3g140100	0.30077781144879401	-1.7332299523848	1.34885e-06	2.27143e-05	2.62833224271155	1.39414765565102	0.00384616	0.0262814	C3	50769724	50769981	+	258	-	-	-	-	-	106328558	A0A0D3BI98
Bo7g080440	0.30652163895051199	-1.7059391700589599	1.36072e-06	2.28935e-05	2.16487717750791	1.11428517717987	0.0421561	0.162072	C7	30737024	30739072	+	666	-	GO:0003824;GO:0003824;GO:0005515;GO:0005737;GO:0005737;GO:0009072;GO:0009072;GO:0016740;	K01800	EC:5.2.1.2	-	106307008	A0A0D3DAD6
Bo6g119260	0.32566358615172297	-1.61854568008216	1.40453e-06	2.35243e-05	0.442454731572789	-1.17639823715219	3.18804e-05	0.000493105	C6	37305271	37308064	-	1818	-	-	-	-	-	106296674	A0A0D3D0T1
Bo7g031300	0	-Inf	1.5443e-06	2.56346e-05	Inf	Inf	0.0101739	0.0557352	C7	11944988	11950684	-	4506	-	GO:0000166;GO:0000723;GO:0000723;GO:0003678;GO:0003678;GO:0004386;GO:0005524;GO:0005524;GO:0006281;GO:0006281;GO:0006281;GO:0006310;GO:0006310;GO:0006974;GO:0016787;GO:0032508;	-	-	-	-	-
Bo7g116360	5.2460516182725701E-2	-4.2526241867735299	1.60003e-06	2.65006e-05	5.3730622927232	2.42574456406064	0.0154063	0.0768055	C7	46427954	46429240	+	1287	-	GO:0005768;GO:0005794;GO:0005802;GO:0016020;GO:0016021;GO:0016021;	-	-	-	106307057	A0A0D3DHI8
Bo5g043720	0.32260720833301698	-1.63214942046661	1.70624e-06	2.8147e-05	4.69877998775908	2.232286217622	5.24826e-05	0.000759616	C5	14871748	14873374	+	1233	-	-	-	-	-	-	-
Bo3g146330	1.00261059757643E-2	-6.6400948011999699	2.21316e-06	3.57022e-05	8.60681520475708	3.10547949333771	0.0202539	0.0944978	C3	52357312	52359672	-	1695	-	GO:0004672;GO:0004672;GO:0005524;GO:0005524;GO:0006468;GO:0006468;GO:0016020;GO:0016021;GO:0016021;	-	-	-	-	-
Bo3g058700	0.18177621038642999	-2.45976469295316	2.25373e-06	3.63095e-05	3.68692153069479	1.88241671166303	6.74472e-06	0.000127917	C3	22579662	22581561	+	966	-	GO:0004124;GO:0004124;GO:0004124;GO:0004124;GO:0006535;GO:0006535;GO:0006535;GO:0008652;GO:0016740;GO:0019344;GO:0019344;	K01738	EC:2.5.1.47	-	106328650	A0A0D3B9Q6
Bo9g108350	0.34711833202568998	-1.5265005360470301	2.27212e-06	3.65741e-05	0.230018415745151	-2.12017872397589	6.28069e-08	1.98226e-06	C9	34604686	34607211	+	2118	-	GO:0005524;GO:0005524;GO:0006457;GO:0006457;GO:0006950;GO:0006950;GO:0009816;GO:0009816;GO:0051082;GO:0051082;GO:0061077;GO:0061077;	K04079	-	-	106318139	A0A0D3EAE6
Bo9g036660	0.21475590666928901	-2.2192302829401398	2.31135e-06	3.71092e-05	0.279791683664324	-1.8375750134231	0.00167007	0.0135961	C9	12139030	12139460	-	303	-	GO:0003677;GO:0003677;GO:0005634;GO:0005634;	-	-	-	-	-
Bo6g003200	0	-Inf	2.44858e-06	3.91604e-05	Inf	Inf	0.000503368	0.00508535	C6	245247	247477	-	1431	-	GO:0016020;GO:0016021;GO:0016021;	-	-	-	106298907	A0A0D3CNK1
Bo01074s060	0.34364326556814501	-1.54101640797128	2.60635e-06	4.13637e-05	0.273873072323173	-1.86842067015689	6.68671e-10	3.08744e-08	Scaffold01074	25603	27508	-	1089	-	GO:0005515;	K03875	-	-	106320805	A0A0D2ZTF9
Bo9g154540	0.21328544466299701	-2.2291425803528799	2.78776e-06	4.39615e-05	2.41168036325281	1.2700387095151	0.00499278	0.0322047	C9	46222573	46224072	+	645	-	GO:0003677;GO:0003677;GO:0006355;GO:0006355;	-	-	-	-	-
Bo1g006060	0.161455096765694	-2.63079511065563	2.96656e-06	4.65052e-05	4.77442044872025	2.25532561974485	0.0248688	0.110462	C1	1723356	1724874	-	843	-	GO:0004601;GO:0004601;GO:0006979;GO:0006979;GO:0016020;GO:0016021;GO:0016021;GO:0020037;GO:0020037;GO:0055114;GO:0055114;GO:0098869;	K00434	EC:1.11.1.11	-	106324893	A0A0D3A1N0
Bo8g070540	3.3689319271728101E-2	-4.8915649121973299	3.142e-06	4.89462e-05	0.320485216767041	-1.64167028465417	0.0407427	0.15838	C8	23138640	23139671	+	741	-	GO:0005622;GO:0005622;GO:0008270;GO:0008270;	-	-	-	106309951	A0A0D3DQP1
Bo7g065110	0.33219472434993302	-1.5898989331302	3.55539e-06	5.4949e-05	0.480983241931112	-1.05594146534953	0.00102924	0.00916954	C7	24733614	24734950	+	945	-	GO:0004392;GO:0004392;GO:0006788;GO:0006788;GO:0055114;GO:0055114;	-	-	-	-	-
Bo1g010450	0.15577613369674001	-2.6824538783995502	3.92862e-06	6.02144e-05	2.14855119883887	1.10336415618137	0.000735489	0.00693928	C1	3553370	3557859	+	3189	-	GO:0005886;GO:0005886;GO:0016020;GO:0016020;GO:0016020;GO:0016021;GO:0016021;GO:0016740;GO:0016757;GO:0016760;GO:0016760;GO:0016760;GO:0030244;GO:0030244;GO:0030244;GO:0046872;GO:0046872;GO:0071555;GO:0071555;	-	-	-	-	-
Bo4g059840	9.3358520680161303E-2	-3.4210744888869602	4.10221e-06	6.26202e-05	3.23257547024437	1.6926840527196	0.0173029	0.0840487	C4	13288935	13293333	-	2292	-	GO:0006811;GO:0006813;GO:0015079;GO:0015079;GO:0015079;GO:0016020;GO:0016020;GO:0016020;GO:0016021;GO:0016021;GO:0071805;GO:0071805;	-	-	-	-	-
Bo2g119360	0.26073488974224401	-1.93934444760958	4.12304e-06	6.29123e-05	2.79227908630603	1.48144314509606	7.2669e-05	0.00100178	C2	37064434	37067638	+	1740	-	GO:0006338;GO:0006338;GO:0031011;GO:0031011;	K11673	-	-	106322514	-
Bo2g046260	7.8448219357814E-2	-3.6721154889523699	4.17537e-06	6.36064e-05	3.10372992268061	1.63400302396787	0.0319899	0.132685	C2	12793632	12794426	-	795	-	GO:0016020;GO:0016021;GO:0016021;GO:0016192;	-	-	-	106325141	A0A0D3AML5
Bo3g140200	0.18253139862022699	-2.45378344055286	4.43648e-06	6.72264e-05	2.65249971062675	1.40735259374989	0.00688358	0.0412111	C3	50841646	50845137	+	1608	-	GO:0000166;GO:0005524;GO:0005524;GO:0005524;GO:0005737;GO:0005737;GO:0006457;GO:0006457;GO:0051082;GO:0051082;	K09497	-	-	106334742	A0A0D3BIA8
Bo6g073030	0.16576963820349	-2.5927483029173799	4.52811e-06	6.8587e-05	3.48441175769328	1.80091511925292	0.000395366	0.00413211	C6	21284740	21286362	-	1473	-	GO:0000166;GO:0000287;GO:0000287;GO:0004019;GO:0004019;GO:0004019;GO:0005525;GO:0005525;GO:0005525;GO:0005737;GO:0006164;GO:0006164;GO:0006164;GO:0006167;GO:0009507;GO:0009507;GO:0009536;GO:0016874;GO:0044208;GO:0044208;GO:0046872;	K01939	EC:6.3.4.4	-	106296482	A0A0D3CUD4
Bo1g054850	0.27857965794117501	-1.8438381795858301	4.75465e-06	7.15813e-05	0.478419822361616	-1.06365092895011	0.0125232	0.0654944	C1	15880507	15882609	-	2103	-	GO:0005515;	-	-	-	106308935	A0A0D3A7N7
Bo3g184440	0.351495309903396	-1.50842265572968	5.02521e-06	7.54714e-05	0.124690483545369	-3.00357673289384	6.51051e-13	5.63642e-11	C3	63959665	63960436	-	534	-	GO:0009408;GO:0009408;GO:0009408;GO:0009644;GO:0009644;GO:0042542;GO:0042542;	K13993	-	-	106331690	A0A0D3BN09
Bo9g018220	0.151055775796964	-2.72684674660881	5.14221e-06	7.70731e-05	3.69820912421889	1.88682680774457	0.000482372	0.00491305	C9	5526421	5528585	+	1764	-	GO:0004857;GO:0004857;GO:0005618;GO:0005618;GO:0016020;GO:0016021;GO:0016021;GO:0016787;GO:0030599;GO:0030599;GO:0042545;GO:0042545;GO:0043086;GO:0045330;GO:0045330;GO:0045490;GO:0045490;	-	-	-	106317671	A0A0D3E271
Bo1g021600	0.278091610073393	-1.84636787515097	5.15892e-06	7.72614e-05	2.82602409460188	1.4987737661016	2.94629e-05	0.00045913	C1	7711576	7717729	+	4947	-	GO:0003677;GO:0003677;GO:0003677;GO:0005515;GO:0005634;GO:0005634;GO:0006351;GO:0006351;GO:0006355;GO:0006355;GO:0007165;GO:0007165;GO:0043531;GO:0043531;GO:0046872;GO:0046872;GO:0046872;	-	-	-	-	-
Bo7g085740	0.183099758936278	-2.4492982031604398	5.27175e-06	7.87511e-05	0.463505293586844	-1.1093422792558	0.00442321	0.0293312	C7	33374075	33375658	+	1284	-	GO:0043531;GO:0043531;	-	-	-	106305886	A0A0D3DBB8
Bo00795s100	0.23920011031466601	-2.0637100400069199	5.63713e-06	8.36155e-05	0.294106116930456	-1.76559130463225	0.010376	0.0566519	Scaffold00795	68659	70152	+	960	-	GO:0004252;GO:0004252;GO:0006508;GO:0006508;GO:0006508;GO:0008233;GO:0016020;GO:0016021;GO:0016021;GO:0016021;GO:0016787;	-	-	-	106320082	A0A0D2ZR62
Bo01139s020	0.34029791628713901	-1.55512977747047	5.93216e-06	8.77819e-05	2.35575190590177	1.2361876109121	8.35495e-05	0.0011228	Scaffold01139	6232	9591	-	3222	-	GO:0005515;GO:0005516;GO:0005516;GO:0006914;GO:0006914;GO:0009408;GO:0009408;GO:0009506;GO:0009506;GO:0009644;GO:0009644;GO:0009817;GO:0009817;GO:0010228;GO:0010228;GO:0010508;GO:0010508;GO:0012502;GO:0012502;GO:0042542;GO:0042542;GO:0050832;GO:0051087;GO:0051087;	-	-	-	106320937	A0A0D2ZTT8
Bo1g046520	0.159341883529039	-2.64980256112226	6.1052e-06	9.0056e-05	3.34464934595522	1.74185496621227	0.00103848	0.00923865	C1	13459336	13460802	+	1284	-	GO:0003676;GO:0003676;GO:0003723;GO:0003723;GO:0003723;	K14411	-	-	106320913	-
Bo7g101430	1.4735385282532701E-2	-6.0845714070235397	6.38793e-06	9.40029e-05	10.7953911083606	3.43234360687872	0.0393851	0.154484	C7	39521334	39521881	+	306	-	GO:0016020;GO:0016021;GO:0016021;	-	-	-	-	-
Bo3g002420	0.23010518830579599	-2.1196345817353701	6.83836e-06	0.000100235	2.47857071896846	1.30950842259665	0.0022106	0.0170473	C3	647459	648947	-	669	-	-	K19373	-	-	106335483	A0A0D3AZK7
Bo5g049430	0.293139032762048	-1.7703430128273201	7.32532e-06	0.000106909	2.27394916580564	1.18520000310446	0.0305183	0.128239	C5	16814676	16816387	-	1257	-	GO:0004553;GO:0004553;GO:0005886;GO:0005975;GO:0005975;GO:0016020;GO:0016021;GO:0016021;GO:0016787;GO:0046658;GO:0046658;	-	-	-	106294842	A0A0D3CDU6
Bo9g059480	0.105463893996129	-3.2451789240906401	7.55375e-06	0.000109898	3.30768308093554	1.72582101217979	0.000534106	0.00535188	C9	17824532	17824825	-	294	-	-	-	-	-	106316175	A0A0D3E6C4
Bo3g026410	0.29393755406800998	-1.76641840242918	7.5907e-06	0.00011035	3.0189320987626	1.59403830839837	5.13143e-06	0.000101234	C3	9674873	9675570	-	402	-	GO:0046983;GO:0046983;	-	-	-	106332558	A0A0D3B4G3
Bo5g008580	0.37359008734615801	-1.42047191908568	7.73047e-06	0.000112163	0.420882532679732	-1.24851045819305	8.25457e-06	0.000152681	C5	2934356	2935750	+	753	-	GO:0004601;GO:0004601;GO:0004601;GO:0006979;GO:0006979;GO:0016491;GO:0016688;GO:0020037;GO:0020037;GO:0055114;GO:0055114;GO:0055114;GO:0098869;	K00434	EC:1.11.1.11	-	106294764	A0A0D3C8E0
Bo1g007110	0.32122929720931698	-1.63832461731517	8.10693e-06	0.00011735	0.467721800102041	-1.09627742181547	0.000332483	0.00357221	C1	2320025	2320654	+	630	-	-	-	-	-	106323935	A0A0D3A1Y5
Bo5g115240	8.2857680201781095E-2	-3.5932207605780002	9.31108e-06	0.000132851	2.92213173371459	1.54702121828269	0.00457444	0.0301152	C5	35275294	35277844	-	2106	-	GO:0005886;GO:0005886;	-	-	-	106295012	A0A0D3CIH6
Bo4g190890	2.3024765806056099E-2	-5.4406697076018604	9.38267e-06	0.000133788	4.23915979550312	2.08377834993507	6.18954e-05	0.000872554	C4	51515290	51515964	-	267	-	GO:0005886;GO:0005886;GO:0009554;GO:0009554;	-	-	-	106339699	A0A0D3C5M4
Bo6g067630	0.19934288167167999	-2.3266760057814801	9.61856e-06	0.000136941	0.0816527919664821	-3.61435397285079	0.000743806	0.00700184	C6	18980880	18986229	-	2526	-	GO:0006812;GO:0006812;GO:0015299;GO:0015299;GO:0016020;GO:0016021;GO:0016021;GO:0016021;GO:0055085;GO:0055085;GO:1902600;	-	-	-	106296909	A0A0D3CTP1
Bo5g007690	0.27212428206806699	-1.87766239865929	9.94689e-06	0.000141022	3.07205273622117	1.61920298221523	1.26351e-05	0.000222273	C5	2483978	2489656	-	3501	-	GO:0005525;GO:0005525;GO:0005634;GO:0005634;GO:0042254;GO:0042254;	K14569	-	-	106292473	A0A0D3C851
Bo1g144260	0.31458841420254802	-1.668462555349	1.0584e-05	0.000149373	2.68411038255941	1.42444400279611	0.012304	0.0645739	C1	41018398	41020551	-	1035	-	GO:0004001;GO:0004001;GO:0004001;GO:0005507;GO:0005507;GO:0005829;GO:0005829;GO:0005886;GO:0005886;GO:0006166;GO:0006166;GO:0006167;GO:0009506;GO:0009506;GO:0009507;GO:0009507;GO:0016020;GO:0016773;GO:0016773;GO:0046686;GO:0046686;GO:0048046;GO:0048046;GO:0080094;GO:0080094;	K00856	EC:2.7.1.20	-	106302967	A0A0D3AEU3
Bo5g004830	0.260719208445235	-1.93943121777598	1.06553e-05	0.000150056	4.06285231398796	2.02249292308496	6.83122e-05	0.000950829	C5	1459273	1462751	+	3030	-	GO:0004672;GO:0004672;GO:0005515;GO:0005524;GO:0005524;GO:0005829;GO:0005829;GO:0006468;GO:0006468;	-	-	-	106294839	A0A0D3C7L4
Bo2g010620	3.6354549084414101E-2	-4.7817202883287901	1.08388e-05	0.000152332	3.35771758480336	1.74748089134169	0.0053526	0.0340513	C2	2590165	2590362	+	198	-	GO:0016020;GO:0016021;GO:0016021;	-	-	-	-	-
Bo7g077560	0.26354397300822002	-1.92388439546107	1.08741e-05	0.000152713	2.20179382957334	1.13867938489797	0.00419252	0.0280662	C7	29198725	29199838	-	825	-	GO:0003677;GO:0003677;GO:0003677;GO:0003700;GO:0003700;GO:0005634;GO:0005634;GO:0005634;GO:0006355;GO:0006355;GO:0043565;GO:0043565;	K09338	-	-	106301877	A0A0D3D9U7
Bo4g105030	0.143993253987756	-2.7959268711807899	1.09235e-05	0.000153292	3.88442960107719	1.95770276539915	0.000797591	0.00742407	C4	26257674	26259113	+	687	-	GO:0005634;GO:0005730;GO:0005730;GO:0006364;GO:0006364;GO:0006364;GO:0032040;GO:0032040;GO:0032040;	K14769	-	-	106339874	A0A0D3BWN3
Bo5g008680	0.22362023209524001	-2.1608773726141299	1.1657e-05	0.000162787	2.30426280202611	1.20430526606767	0.00795065	0.0459874	C5	3000540	3003574	-	1485	-	GO:0008146;GO:0008146;GO:0016020;GO:0016021;GO:0016021;GO:0016021;	K22218	EC:2.8.2.20	-	106343721	A0A0D3C8F0
Bo8g108160	0.185075477242306	-2.43381434611153	1.19251e-05	0.000166157	0.46175667436176	-1.11479528040619	0.00395216	0.0268113	C8	38528519	38528998	+	480	-	GO:0003677;GO:0003677;GO:0008270;GO:0008270;GO:0046872;	-	-	-	106312173	A0A0D3DXR6
Bo1g010630	0.37898897985903401	-1.3997721961845799	1.21364e-05	0.000168722	0.221594618410407	-2.17400524999346	3.65683e-13	3.28764e-11	C1	3632063	3634573	-	2262	-	-	-	-	-	106307763	A0A0D3A2N8
Bo4g059820	4.1762767981935497E-2	-4.5816388547473998	1.25342e-05	0.000173345	20.5898511466235	4.36386149499817	5.1063e-07	1.30448e-05	C4	13282164	13282557	+	249	-	-	-	-	-	-	-
Bo5g141450	0.108214133573498	-3.2080391566767399	1.26222e-05	0.000174433	3.1408464588065	1.65115341814661	0.0321758	0.13322	C5	43851993	43853063	+	672	-	GO:0006914;	K17888	-	-	106293249	A0A0D3CM11
Bo7g014780	0.2169061060502	-2.2048574284868998	1.28062e-05	0.000176516	6.11665670885648	2.6127433085543	2.32359e-10	1.18881e-08	C7	5538418	5539500	+	1083	-	-	-	-	-	106306980	A0A0D3D3H8
Bo8g117420	0.37260154048612798	-1.4242944559081201	1.35085e-05	0.000185578	0.313290277075659	-1.67442809834276	8.63865e-07	2.10069e-05	C8	41277877	41278856	+	630	-	-	-	-	-	-	-
Bo3g107690	0.30934856751261802	-1.6926947415475	1.39381e-05	0.000190917	2.17909074202615	1.12372627462974	0.00140194	0.0117685	C3	38165734	38167319	+	1263	-	GO:0005515;GO:0051087;	-	-	-	106328003	A0A0D3BFT3
Bo2g014230	0	-Inf	1.39764e-05	0.00019137	Inf	Inf	1.16483e-11	7.58967e-10	C2	4631818	4632117	+	300	-	GO:0009733;GO:0009733;	K14488	-	-	106327404	A0A0D3AJP0
Bo8g108600	0.32430304308601798	-1.6245855335527599	1.46111e-05	0.000199328	0.401827806265029	-1.31535069365182	0.000497229	0.00503558	C8	38760283	38761468	-	657	-	GO:0016020;GO:0016021;GO:0016021;GO:0016021;GO:0016192;GO:0016192;	K08517	-	-	106309846	A0A0D3DXW0
Bo3g064900	0.178041882228967	-2.4897114369735198	1.49902e-05	0.000203988	3.98019044083835	1.99283746129154	7.4919e-05	0.00102749	C3	24917884	24919073	+	606	-	GO:0005854;GO:0005854;	K03626	-	-	106335439	A0A0D3BAX8
Bo2g167770	0.39009442401188898	-1.3581047181805901	1.51076e-05	0.000205361	0.194250069257477	-2.36401298187909	1.25782e-05	0.000221544	C2	52479469	52482597	+	1887	-	GO:0005743;GO:0005743;GO:0006099;GO:0006099;GO:0006099;GO:0008177;GO:0008177;GO:0016020;GO:0016491;GO:0016491;GO:0016491;GO:0016627;GO:0016627;GO:0022900;GO:0022900;GO:0050660;GO:0050660;GO:0055114;GO:0055114;GO:0055114;	K00234	EC:1.3.5.1	-	106327919	A0A0D3AYU8
Bo9g006360	0.37119647403303002	-1.4297450884068501	1.51085e-05	0.000205361	0.494653836156813	-1.01550882942215	0.00472763	0.0308952	C9	1446307	1450795	+	2436	-	GO:0003824;GO:0003824;GO:0009507;GO:0009507;	-	-	-	106315445	A0A0D3E080
Bo1g138280	0.13683498313498599	-2.8694909791134999	1.57295e-05	0.000213024	2.60423680613945	1.38086064032757	0.0402711	0.156987	C1	39243544	39244068	+	456	-	GO:0009642;GO:0009642;	-	-	-	106344693	A0A0D3ADZ2
Bo8g117910	0.286800665428875	-1.80187972353295	1.57376e-05	0.000213056	3.51104923824142	1.81190222842278	5.78242e-07	1.46025e-05	C8	41515655	41517644	+	1359	-	GO:0000166;GO:0004672;GO:0004672;GO:0004674;GO:0004674;GO:0005524;GO:0005524;GO:0005524;GO:0006468;GO:0006468;GO:0016020;GO:0016021;GO:0016021;	-	-	-	106307829	A0A0D3DZE5
Bo3g035400	0.24175005286659501	-2.0484118896925199	1.61226e-05	0.000217713	0.193218799692832	-2.37169262336318	0.000187014	0.0022155	C3	13718348	13718891	+	450	-	GO:0005509;GO:0005509;GO:0005774;GO:0005874;GO:0005886;	-	-	-	-	-
Bo3g065420	1.62525113716846E-2	-5.9431935261854498	1.61674e-05	0.000218239	60.9667360778856	5.9299504066634	4.9129e-06	9.73211e-05	C3	25244897	25245247	+	351	-	-	-	-	-	106331751	A0A0D3BB30
Bo00795s060	0.22877765961414501	-2.1279819166237601	1.8313e-05	0.000244628	2.8427352274106	1.5072797325398	0.000653143	0.00631366	Scaffold00795	29855	30931	-	444	-	-	-	-	-	106320084	A0A0D2ZR58
Bo3g007260	0.22958624653722901	-2.1228918755516601	1.88368e-05	0.000250726	2.41801639640942	1.27382402743996	0.00451884	0.0298279	C3	2606010	2607545	+	702	-	GO:0003735;GO:0003735;GO:0005622;GO:0005622;GO:0005840;GO:0005840;GO:0006412;GO:0006412;	K02884	-	-	106335689	A0A0D3B0P2
Bo6g069920	0.27709762050532599	-1.8515337727360399	2.048e-05	0.000270861	2.30095186041527	1.20223080039526	0.0333557	0.136818	C6	20261242	20262727	-	744	-	GO:0004322;GO:0004322;GO:0005623;GO:0005623;GO:0006826;GO:0006826;GO:0006879;GO:0006879;GO:0006879;GO:0008199;GO:0008199;GO:0016491;GO:0046872;GO:0055114;	K00522	EC:1.16.3.2	-	106296929	A0A0D3CU21
Bo7g095020	7.7381332913482703E-2	-3.69187060998417	2.05194e-05	0.000271183	6.10216154619388	2.60932037375593	0.00246144	0.0185115	C7	36381497	36384490	+	1677	-	-	-	-	-	-	-
Bo5g136920	0.280201940891111	-1.83546114588422	2.07059e-05	0.000273356	2.612073502936	1.38519549444531	0.00145304	0.0121005	C5	42533594	42535384	+	1329	-	GO:0005794;GO:0005794;GO:0009834;GO:0009834;GO:0016020;GO:0016021;GO:0016021;GO:1990538;GO:1990538;GO:1990937;GO:1990937;	-	-	-	106296044	A0A0D3CLA6
Bo7g030920	7.2396371183168703E-2	-3.7879388047211	2.08702e-05	0.00027533	5.65211860636523	2.49879174009145	6.3845e-05	0.00089565	C7	11470324	11472473	+	1575	-	GO:0000166;GO:0005524;GO:0005524;GO:0005978;GO:0005978;GO:0008878;GO:0008878;GO:0008878;GO:0009058;GO:0009058;GO:0009507;GO:0009507;GO:0009536;GO:0016740;GO:0016779;GO:0016779;GO:0016779;GO:0019252;GO:0019252;	K00975	EC:2.7.7.27	-	106306931	A0A0D3D4Q4
Bo4g190240	0.30922557620383501	-1.69326844465293	2.0917e-05	0.000275849	0.430484298723116	-1.21596747646941	0.00480804	0.0312841	C4	51120472	51122299	+	1173	-	GO:0004853;GO:0004853;GO:0004853;GO:0006779;GO:0006779;GO:0006779;GO:0006782;GO:0006782;GO:0016829;GO:0016831;	K01599	EC:4.1.1.37	-	106343058	A0A0D3C5F9
Bo3g081430	0.102855452153882	-3.2813098247300201	2.15878e-05	0.00028369	0.0825214607280241	-3.59908683090582	3.03784e-24	2.46989e-21	C3	29779503	29780607	-	588	-	-	-	-	-	106332684	A0A0D3BCU1
Bo3g167320	0.27091928015765798	-1.8840650273051101	2.27036e-05	0.000297199	2.64209047053098	1.40167986823187	0.000359726	0.00381347	C3	59145369	59147047	-	657	-	GO:0000413;GO:0000413;GO:0003755;GO:0003755;GO:0003755;GO:0006457;GO:0006457;GO:0016853;	-	-	-	106335367	-
Bo01532s030	0.27706368196002801	-1.85171048291353	2.29648e-05	0.000300301	0.440356086201266	-1.18325748924235	0.0155564	0.0773578	Scaffold01532	4968	7942	+	1590	-	GO:0003980;GO:0003980;GO:0006486;GO:0006486;GO:0097359;	-	-	-	-	-
Bo7g097840	0.18113242854521699	-2.4648832365443298	2.30452e-05	0.000301142	3.85564308193474	1.94697150702551	0.000112012	0.00144308	C7	38112073	38113860	-	1233	-	-	-	-	-	106306550	A0A0D3DDD3
Bo4g182510	0.13531131771692501	-2.8856455805454999	2.3068e-05	0.000301334	0.229163026571105	-2.12555379811087	0.0133618	0.0689191	C4	48216756	48217181	-	426	-	-	-	-	-	106340109	A0A0D3C433
Bo1g078970	0.12282042108039	-3.0253776405145101	2.36703e-05	0.000307796	0.204392040894199	-2.29058907662569	0.0371768	0.148153	C1	23523522	23526147	+	1299	-	-	-	-	-	-	-
Bo1g078680	0.30589058269837599	-1.7089124028441001	2.38615e-05	0.000310066	0.273166639606852	-1.87214678919676	9.95203e-08	2.99896e-06	C1	23144102	23146656	-	2169	-	GO:0000287;GO:0000287;GO:0003824;GO:0003824;GO:0004743;GO:0004743;GO:0006096;GO:0006096;GO:0030955;GO:0030955;	K00873	EC:2.7.1.40	-	106319996	A0A0D3A9D8
Bo9g135300	0.25596506789072099	-1.9659811589570899	2.5278e-05	0.000326648	2.09732557014552	1.06855082994982	0.0119167	0.0630746	C9	41524011	41527553	-	2775	-	GO:0005515;	-	-	-	106318101	A0A0D3ECG1
Bo6g071070	0.22936965947528901	-2.1242535275068199	2.57024e-05	0.000332017	2.49300095198891	1.31788343374374	0.00361154	0.0250318	C6	20367164	20368471	+	624	-	-	-	-	-	-	-
Bo9g151770	8.13400093911575E-2	-3.6198910324074798	2.65439e-05	0.000342057	4.67808713273209	2.2259187331717	0.0144153	0.0729939	C9	45105454	45107915	-	1491	-	GO:0016020;GO:0016021;GO:0016021;	-	-	-	106318457	A0A0D3EDS0
Bo1g046450	0.12489257269481301	-3.00124041181637	2.73006e-05	0.000350835	6.24481080550191	2.64265786421133	1.212e-05	0.000215134	C1	13417830	13421403	+	1896	-	GO:0003723;GO:0003723;GO:0003723;GO:0006364;GO:0006364;GO:0008168;GO:0008168;GO:0008168;GO:0008757;GO:0008757;GO:0016740;GO:0032259;	K14835	EC:2.1.1.310	-	106323872	A0A0D3A6P2
Bo2g046280	0.17959279713017801	-2.4771986053481401	2.76581e-05	0.000354939	2.46582760061179	1.30207193662766	0.0187157	0.0891452	C2	12804909	12805856	-	423	-	-	-	-	-	-	-
Bo8g108500	8.4239199590743399E-2	-3.5693644612927602	2.77224e-05	0.000355519	5.86080763189464	2.55109948482574	4.69541e-05	0.000690622	C8	38722737	38728223	+	2283	-	GO:0003872;GO:0003872;GO:0005524;GO:0005524;GO:0006002;GO:0006002;GO:0006096;GO:0006096;GO:0008375;GO:0008375;GO:0016020;GO:0016020;GO:0046835;GO:0047334;GO:0047334;GO:0061615;	-	-	-	-	-
Bo4g038770	0.28198707630326503	-1.8262990506336501	2.79691e-05	0.000358189	4.99025756188253	2.3191142792221	6.75865e-06	0.000128116	C4	8318867	8320794	-	1131	-	GO:0016020;GO:0016020;GO:0016020;GO:0016021;GO:0016021;	-	-	-	106336847	A0A0D3BRV7
Bo7g082100	0.147270676419027	-2.76345789598895	2.82502e-05	0.000361168	4.72681498545415	2.24086839657904	0.000534187	0.00535188	C7	32167353	32168848	-	828	-	GO:0016020;GO:0016021;GO:0016021;	-	-	-	-	-
Bo7g098440	0.30181808948199301	-1.7282488184334099	2.90831e-05	0.000370289	2.22840722858686	1.15601290098036	0.000543112	0.00542821	C7	38493847	38496091	+	981	-	GO:0005515;	-	-	-	106306276	A0A0D3DDJ3
Bo11796s010	1.46398437109201E-2	-6.0939560377022302	2.98582e-05	0.000378733	36.3562762439099	5.18413253535561	0.000274108	0.00306476	Scaffold11796	202	509	+	246	-	GO:0004553;GO:0004553;GO:0005975;GO:0005975;	-	-	-	-	-
Bo9g021780	0	-Inf	3.22139e-05	0.000406398	Inf	Inf	0.0291896	0.124438	C9	6583513	6585870	-	1548	-	GO:0046872;GO:0046872;	-	-	-	106316126	A0A0D3E2M9
Bo4g087130	0.24124017026460601	-2.05145793633845	3.48497e-05	0.000436102	4.0065653423991	2.00236600555639	7.11075e-08	2.21803e-06	C4	21851345	21851927	-	471	-	-	-	-	-	106340091	A0A0D3BVH9
Bo1g003680	0.12518964624402801	-2.99781284515733	3.53181e-05	0.000441369	0.106168686532349	-3.23556977550544	0.00114911	0.0100226	C1	904518	907591	-	1437	-	GO:0004497;GO:0004497;GO:0005506;GO:0005506;GO:0016491;GO:0016705;GO:0016705;GO:0020037;GO:0020037;GO:0046872;GO:0055114;GO:0055114;GO:0055114;	-	-	-	-	-
Bo3g009460	0.27815187700314598	-1.84605525377905	3.55986e-05	0.000444427	3.70963382295508	1.89127678580047	7.80785e-07	1.91736e-05	C3	3220095	3223549	+	1833	-	GO:0005515;GO:0005634;GO:0005634;GO:0005634;GO:0005694;GO:0005694;GO:0008168;GO:0008270;GO:0008270;GO:0008327;GO:0008327;GO:0010216;GO:0010216;GO:0010385;GO:0010385;GO:0010428;GO:0010428;GO:0010429;GO:0010429;GO:0016571;GO:0016571;GO:0016571;GO:0016740;GO:0018022;GO:0018024;GO:0018024;GO:0032259;GO:0034968;GO:0034968;GO:0046974;GO:0046974;GO:0051567;	K11420	EC:2.1.1.43	-	106328177	A0A0D3B113
Bo8g094940	0.189882350131308	-2.3968222839835698	3.61585e-05	0.000450812	4.29117682989651	2.10137335257975	0.0188866	0.0897531	C8	32349131	32352707	-	1878	-	GO:0000166;GO:0003924;GO:0003924;GO:0005525;GO:0005525;GO:0005525;	-	-	-	106312544	A0A0D3DUJ2
Bo1g077040	0.35173007186893002	-1.5074594085408699	3.64532e-05	0.000454334	2.35698720034144	1.23694392402971	0.000164093	0.00198855	C1	22394950	22397943	-	2028	-	GO:0003676;GO:0003676;	-	-	-	106311012	A0A0D3A973
Bo1g001060	6.2617023551187395E-2	-3.9973012569927802	3.67351e-05	0.000457235	33.833519309981	5.08038134671574	5.13442e-10	2.42765e-08	C1	13442	18016	+	3333	-	GO:0016020;GO:0016020;GO:0016020;GO:0016021;GO:0016021;GO:0016740;GO:0016757;GO:0016760;GO:0016760;GO:0030244;GO:0030244;GO:0071555;GO:0071555;	K20924	EC:2.4.1.-	-	106325228	A0A0D3A0S8
Bo2g023700	0.29092560217591401	-1.7812778321138201	3.75894e-05	0.0004674	2.07420410912137	1.05255786750139	0.00660851	0.0399635	C2	6252625	6253959	-	1335	-	-	-	-	-	106322037	A0A0D3AKE4
Bo7g089360	0.27894677051042899	-1.84193824612034	3.78724e-05	0.000470604	0.463181730280713	-1.1103497460361	0.0175866	0.085122	C7	34576903	34579586	-	1713	-	GO:0000413;GO:0003755;GO:0003755;GO:0005515;GO:0005773;GO:0005773;GO:0016853;GO:0070370;GO:0070370;	-	-	-	106301979	A0A0D3DBT2
Bo3g026350	9.5990926548357197E-2	-3.3809581468819698	4.01682e-05	0.000496314	2.00008722808261	1.00006292038901	0.0310073	0.129688	C3	9643943	9645310	+	750	-	GO:0003723;GO:0003723;GO:0003723;GO:0003735;GO:0003735;GO:0005840;GO:0005840;GO:0006412;GO:0006412;GO:0015935;GO:0015935;	K02985	-	-	106334420	A0A0D3B4F7
Bo5g034600	0.39800641875561599	-1.3291363972032999	4.0511e-05	0.000499721	0.427909167294868	-1.22462350807559	7.83978e-05	0.00106389	C5	11245049	11248069	-	2256	-	GO:0004672;GO:0004672;GO:0005524;GO:0005524;GO:0006468;GO:0006468;GO:0006950;GO:0006950;	-	-	-	106295626	A0A0D3CC54
Bo1g006650	0.35618218138305902	-1.4893127499057199	4.09927e-05	0.000505327	2.38515347950763	1.25408210354747	0.000132636	0.00165906	C1	2053583	2054834	-	846	-	GO:0004061;GO:0004061;GO:0005783;GO:0005783;GO:0005794;GO:0005794;GO:0019441;GO:0019441;	-	-	-	-	-
Bo5g132830	0.37033139922872399	-1.4331112186397399	4.13932e-05	0.000509793	0.494468393508551	-1.01604978823215	0.00167837	0.0136399	C5	41322728	41324296	-	699	-	GO:0000398;GO:0000398;GO:0005681;GO:0005681;	K12863	-	-	106343752	A0A0D3CKP5
Bo2g009840	0.19791037938316	-2.33708081857095	4.25882e-05	0.000523954	3.35871858520234	1.74791092247298	0.000630437	0.0061354	C2	2154791	2155201	-	411	-	GO:0000786;GO:0000786;GO:0000786;GO:0003677;GO:0003677;GO:0003677;GO:0005634;GO:0005634;GO:0005694;GO:0010369;GO:0010369;GO:0010369;GO:0046982;GO:0046982;	-	-	-	-	-
Bo8g070930	0.12721110779084499	-2.9747034458444399	4.37456e-05	0.00053644	3.43966024615769	1.7822660691743	0.00733497	0.043208	C8	23390449	23397046	-	5253	-	GO:0046872;GO:0046872;GO:0046872;	-	-	-	106312331	A0A0D3DQT0
Bo9g179040	0.19180103268694901	-2.3823176068132299	4.37472e-05	0.00053644	3.27183744471605	1.71010107238488	0.000923993	0.00837145	C9	53348682	53350280	+	921	-	-	-	-	-	106313789	A0A0D3EHW0
Bo9g169600	0.11525109225916599	-3.1171476714395601	4.38651e-05	0.000537531	2.09870979187532	1.06950268555885	0.000887918	0.00811736	C9	50009423	50009870	+	306	-	GO:0004869;GO:0004869;GO:0004869;GO:0010466;GO:0010951;GO:0030414;	-	-	-	106318070	A0A0D3EG13
Bo7g119320	0.174687494298739	-2.5171517640166501	4.73352e-05	0.000575469	2.76450323831777	1.46702026165261	0.000102827	0.00134184	C7	48065761	48066560	-	327	-	-	-	-	-	-	-
Bo4g019720	0.228278696421026	-2.1311318652056501	4.94112e-05	0.000598012	0.056615012633944	-4.14267152575168	1.05488e-15	1.7079e-13	C4	2587514	2589451	+	1512	-	GO:0005215;GO:0005215;GO:0016020;GO:0016020;GO:0016020;GO:0016021;GO:0016021;GO:0016021;GO:0022857;GO:0022857;GO:0055085;GO:0055085;	K08150	-	-	106339481	A0A0D3BPJ1
Bo3g065020	0.39957567741608402	-1.3234593274205899	5.00058e-05	0.000604251	0.124840604925062	-3.00184084180731	0.000231313	0.00266187	C3	24960995	24963363	-	1953	-	GO:0000166;GO:0005524;GO:0005524;	K03283	-	-	106335088	A0A0D3BAZ0
Bo3g155600	0.28946249014391701	-1.78855168549653	5.19656e-05	0.000626482	2.82539926104264	1.49845475114758	0.0299804	0.126768	C3	55654053	55655579	+	1527	-	GO:0009507;GO:0009521;GO:0009521;GO:0009523;GO:0009523;GO:0009523;GO:0009535;GO:0009536;GO:0009579;GO:0009767;GO:0009767;GO:0009772;GO:0009772;GO:0015979;GO:0015979;GO:0015979;GO:0016020;GO:0016020;GO:0016020;GO:0016021;GO:0016021;GO:0016168;GO:0016168;GO:0016168;GO:0018298;GO:0018298;GO:0019684;GO:0019684;GO:0045156;GO:0045156;	-	-	-	-	-
Bo1g114800	0.144848763887166	-2.7873807219218798	5.63345e-05	0.00067197	3.10452592770795	1.6343729805352	0.0152016	0.0760487	C1	34628866	34629288	-	423	-	-	-	-	-	-	-
Bo7g109490	0.40582812651907402	-1.3010592382122199	5.7339e-05	0.000682857	0.447926323890637	-1.15866664139631	9.44254e-05	0.00124437	C7	43343494	43346456	+	2127	-	GO:0000166;GO:0005524;GO:0005524;GO:0005524;GO:0006457;GO:0006457;GO:0051082;GO:0051082;	K03283	-	-	106306084	A0A0D3DFV0
Bo3g083270	0.38717962781457799	-1.36892505039493	5.82498e-05	0.000691913	0.372302538687273	-1.4254526410964	0.00203129	0.0158635	C3	30738654	30740790	-	1737	-	GO:0005515;GO:0005618;GO:0009505;GO:0009505;GO:0009506;GO:0009506;	-	-	-	-	-
Bo2g045950	0.14451100883419099	-2.7907486936110999	6.10225e-05	0.000722103	35.555397707504	5.15199668862017	2.95972e-15	4.27388e-13	C2	12482681	12482971	-	192	-	GO:0016020;GO:0016021;GO:0016021;	-	-	-	106325656	A0A0D3AMI4
Bo5g117130	7.3311593806975606E-2	-3.76981481944875	6.17384e-05	0.000728489	3.68147322494192	1.8802832089439	0.000618329	0.00603641	C5	35934908	35935345	-	339	-	GO:0003723;GO:0003735;GO:0003735;GO:0005622;GO:0005622;GO:0005840;GO:0005840;GO:0006412;GO:0006412;	-	-	-	-	-
Bo5g017940	0.20281126095035901	-2.3017903357107898	6.37008e-05	0.000749033	4.20991075543153	2.07378965037931	0.0391785	0.153948	C5	6087963	6089479	+	969	-	-	-	-	-	106293297	A0A0D3C9Y0
Bo6g098920	0.23219962932326901	-2.1065624257584301	7.07536e-05	0.00082158	3.53247758296448	1.82068040527299	5.57817e-05	0.000797491	C6	31238561	31244163	+	2559	-	GO:0003824;GO:0003824;GO:0004558;GO:0004558;GO:0004573;GO:0004573;GO:0005783;GO:0005783;GO:0009311;GO:0009311;GO:0009913;GO:0010053;GO:0010053;GO:0016020;GO:0016021;GO:0016021;	K01228	EC:3.2.1.106	-	106300894	A0A0D3CY36
Bo00629s160	0.40320357430484699	-1.31041966684065	7.13566e-05	0.00082755	0.446333008225681	-1.16380759091338	7.95685e-05	0.0010786	Scaffold00629	152017	156121	-	2346	-	GO:0003677;GO:0003677;GO:0005634;GO:0005634;GO:0016020;GO:0016021;GO:0016021;GO:0046872;GO:0046872;	-	-	-	106319840	A0A0D2ZQ95
Bo8g083620	0.111098654544299	-3.1700867497537102	7.60253e-05	0.000872719	3.60403658139781	1.84961365475117	0.0224489	0.10188	C8	29106893	29107347	-	390	-	-	-	-	-	-	-
Bo5g139370	0.41510222542334402	-1.2684614284273701	8.1408e-05	0.00092821	0.174149217246606	-2.52160410647021	6.08911e-18	1.53136e-15	C5	43316890	43318592	-	1104	-	GO:0005488;	K09562	-	-	106343202	A0A0D3CLQ2
Bo2g165990	0.35445352442551598	-1.4963316196832399	8.32063e-05	0.000946975	3.65635330389499	1.87040548099513	2.53233e-08	8.65713e-07	C2	51856702	51858729	+	1047	-	GO:0006790;GO:0006790;GO:0008441;GO:0008441;GO:0016311;GO:0046854;GO:0046854;	K15422	-	-	106327641	-
Bo3g003930	0.124918015062759	-3.0009465445425998	8.40405e-05	0.000955591	2.5970922456731	1.37689725776358	0.0170465	0.0830886	C3	1398734	1402031	+	1107	-	-	-	-	-	106329272	A0A0D3B008
Bo5g113730	0.34907443111118802	-1.5183934081772801	8.63207e-05	0.000977636	2.56492982736832	1.35891935640052	0.0106584	0.0578303	C5	34736467	34737998	-	1428	-	-	-	-	-	106296002	A0A0D3CIC4
Bo5g126970	0.23414433719284899	-2.09452994817042	8.679e-05	0.000981756	2.19134279673313	1.13181518604563	0.0237014	0.106338	C5	39278226	39279173	+	870	-	GO:0008152;GO:0008152;GO:0008168;GO:0008168;GO:0016020;GO:0016021;GO:0016021;GO:0032259;	-	-	-	106343314	A0A0D3CJV6
Bo6g115800	0.159119806091194	-2.6518146717192299	8.72555e-05	0.000985823	3.12893304884715	1.64567078893052	0.00992231	0.0546772	C6	36093290	36094204	+	915	-	GO:0016020;GO:0016021;GO:0016021;	-	-	-	106296752	A0A0D3D034
Bo7g115410	0.32024945155390599	-1.64273199501876	9.13947e-05	0.00102636	0.214887647449802	-2.21834554127528	3.50864e-06	7.28613e-05	C7	45981043	45982178	+	858	-	GO:0003677;GO:0003700;GO:0003700;GO:0005634;GO:0005634;GO:0006351;GO:0006351;GO:0006355;GO:0006355;GO:0006355;GO:0043565;GO:0043565;	-	-	-	106301364	A0A0D3DH93
Bo3g001650	0.26913007001040601	-1.89362450200912	9.46948e-05	0.00105894	0.471505066188018	-1.08465482255526	0.0440024	0.167364	C3	295413	297504	-	2001	-	-	-	-	-	106328171	A0A0D3AZD0
Bo9g025980	0	-Inf	0.000102848	0.00114018	Inf	Inf	2.74491e-12	2.04094e-10	C9	8216525	8219040	+	1878	-	GO:0004672;GO:0004672;GO:0005524;GO:0005524;GO:0006468;GO:0006468;GO:0016020;GO:0016021;GO:0016021;	-	-	-	106316477	A0A0D3E3A1
Bo1g040370	0.41741382732091198	-1.2604497026385499	0.000104044	0.00115036	0.322292246886845	-1.63355861177206	9.49272e-06	0.000173016	C1	12593139	12595351	-	1608	-	GO:0009507;GO:0009536;GO:0009941;GO:0009941;GO:0010277;GO:0010277;GO:0016020;GO:0016021;GO:0016021;GO:0016491;GO:0016491;GO:0051537;GO:0051537;GO:0055114;GO:0055114;	-	-	-	106314162	A0A0D3A6C9
Bo3g101260	0.19423901092433901	-2.36409511444444	0.000106649	0.00117811	4.78624535085876	2.25889435370771	6.89864e-05	0.000958761	C3	36276730	36282092	-	1812	-	-	-	-	-	-	-
Bo2g057690	0.13883889315738401	-2.8485163259242001	0.000106759	0.00117827	5.56694191005058	2.47688502904186	0.0360785	0.145185	C2	17047389	17048454	+	627	-	GO:0005783;GO:0005789;GO:0005789;GO:0016020;GO:0016021;GO:0016021;	-	-	-	-	-
Bo1g034580	3.2269121640693899E-2	-4.9537018812979099	0.000109124	0.00120295	12.8776934883984	3.68680231172245	0.0161796	0.0797288	C1	10605887	10608389	+	2223	-	GO:0000166;GO:0005524;GO:0005524;GO:0005524;GO:0009507;GO:0009507;GO:0009507;GO:0009536;GO:0009570;	-	-	-	-	-
Bo4g190220	0.34575604494809797	-1.5321736202566201	0.000110818	0.00121989	0.385509875322531	-1.37516027781745	0.000590671	0.00581191	C4	51104826	51105386	-	561	-	-	-	-	-	-	-
Bo1g091570	0.13092585341525201	-2.93317808613646	0.000110824	0.00121989	2.4004087033572	1.26328006587838	0.019815	0.0929884	C1	26967458	26969999	-	1707	-	GO:0003676;GO:0003676;GO:0005524;GO:0005524;	-	-	-	106294476	A0A0D3AA87
Bo1g003150	0.233553984174702	-2.0981720387449401	0.000110825	0.00121989	0.336091249367964	-1.5730751144485	0.0264678	0.11548	C1	561431	562659	+	1098	-	GO:0005543;GO:0005543;	-	-	-	106293386	A0A0D3A138
Bo6g077140	8.6361796936872098E-2	-3.5334629278299698	0.000112074	0.00123255	4.78362249356463	2.25810354167823	0.0153649	0.0766706	C6	22871969	22873012	+	723	-	GO:0003677;GO:0003677;GO:0003677;GO:0003700;GO:0003700;GO:0005634;GO:0005634;GO:0005634;GO:0006351;GO:0006351;GO:0006355;GO:0006355;GO:0006355;GO:0008270;GO:0008270;GO:0043565;GO:0043565;GO:0045893;GO:0045893;GO:0046872;	-	-	-	106296886	A0A0D3CUZ7
Bo1g102010	0.21104700576301499	-2.2443637337343398	0.000116838	0.00127927	2.81029322137671	1.49072066672955	0.00379245	0.0260061	C1	30806105	30810733	-	1593	-	GO:0000166;GO:0004672;GO:0004672;GO:0004674;GO:0004674;GO:0004674;GO:0005524;GO:0005524;GO:0005524;GO:0006468;GO:0006468;GO:0016301;GO:0016310;GO:0016740;	-	-	-	-	-
Bo9g018080	0.200313189326466	-2.3196706784824701	0.000119141	0.00130104	4.23020299196401	2.08072689466276	1.64859e-09	7.0708e-08	C9	5421330	5422393	+	441	-	-	-	-	-	106315929	A0A0D3E257
Bo6g114490	0.251130963221116	-1.9934881780596501	0.000120589	0.00131454	2.62448471823259	1.39203419709365	0.00239161	0.0181138	C6	35889804	35890406	+	603	-	-	-	-	-	106298687	A0A0D3D002
Bo9g003680	0.292304972385454	-1.77445372392054	0.000120869	0.00131644	2.2668834248233	1.18071020195048	0.00359992	0.0249837	C9	375586	376702	-	504	-	GO:0009579;GO:0009579;GO:0016020;GO:0016021;GO:0016021;	-	-	-	106313518	A0A0D3DZR1
Bo5g139990	0.40469962795661601	-1.3050765721597199	0.000124721	0.00135681	0.463523509888356	-1.10928558076325	0.000661636	0.00638092	C5	43617510	43619750	-	1689	-	GO:0004672;GO:0004672;GO:0005524;GO:0005524;GO:0006468;GO:0006468;	-	-	-	106295658	A0A0D3CLW4
Bo1g084850	0.14345741023469599	-2.8013056030252601	0.000127365	0.00138435	2.44316460372903	1.28875106580892	4.51009e-05	0.000668293	C1	24579415	24581963	+	1758	-	GO:0004672;GO:0004672;GO:0005524;GO:0005524;GO:0006468;GO:0006468;	K00924	EC:2.7.1.-	-	106314800	A0A0D3A9R0
Bo3g055660	0.40968543905416599	-1.28741147709393	0.000132115	0.00143305	0.180070234944937	-2.47336836698142	4.61465e-07	1.19108e-05	C3	22035030	22037671	+	831	-	-	-	-	-	106336138	A0A0D3B9F0
Bo3g004850	0.24482676238371201	-2.0301668250597	0.000134951	0.00145913	6.06955006295279	2.60158957315214	8.17168e-05	0.00110372	C3	1849640	1850347	+	708	-	GO:0003677;GO:0003677;GO:0005634;GO:0005634;GO:0006351;GO:0006351;GO:0006355;GO:0006355;	K16221	-	-	106336081	A0A0D3B0A0
Bo2g051390	0.24149590638233201	-2.0499293608654998	0.00014234	0.00152969	0.18983118088016	-2.3972111119778	9.10342e-10	4.05249e-08	C2	14770641	14774017	-	1341	-	GO:0000272;GO:0003824;GO:0003824;GO:0004553;GO:0004553;GO:0005975;GO:0005975;GO:0005975;GO:0008152;GO:0008810;GO:0008810;GO:0016787;GO:0016798;GO:0030245;GO:0030245;	-	-	-	-	-
Bo8g060130	0	-Inf	0.000143147	0.00153704	Inf	Inf	0.0122363	0.064329	C8	19912803	19914212	+	900	-	GO:0016020;GO:0016021;GO:0016021;	-	-	-	-	-
Bo1g011730	0.40348823887892998	-1.30940147332565	0.000146912	0.00157247	0.38435769777536	-1.37947853236572	1.4933e-05	0.000256073	C1	4190827	4192655	-	846	-	-	-	-	-	106334104	A0A0D3A2Z8
Bo3g048720	0.26871525831078302	-1.89584985145103	0.000150468	0.00160645	3.83476760093102	1.93913914848605	1.26885e-05	0.000222941	C3	20024995	20027588	-	1233	-	GO:0047262;GO:0047262;	-	-	-	-	-
Bo3g002590	0.104201882217677	-3.2625467573709099	0.00015209	0.00162207	0	-Inf	0.027375	0.118594	C3	758734	760645	+	840	-	-	-	-	-	-	-
Bo3g066370	0.149095040271081	-2.7456958285156898	0.000157618	0.00167646	0.0843326367416291	-3.56776512737132	2.45717e-05	0.000391056	C3	25959554	25961950	+	1587	-	GO:0004497;GO:0004497;GO:0005506;GO:0005506;GO:0016020;GO:0016021;GO:0016021;GO:0016491;GO:0016705;GO:0016705;GO:0020037;GO:0020037;GO:0046872;GO:0055114;GO:0055114;GO:0055114;	-	-	-	106334974	A0A0D3BBC5
Bo9g174720	0.242813141930734	-2.0420815872756402	0.000158027	0.00168032	2.61525571998249	1.38695202024399	0.00376821	0.0258686	C9	51658507	51660267	+	900	-	GO:0004668;GO:0004668;GO:0009446;GO:0009446;GO:0047632;GO:0047632;	-	-	-	-	-
Bo9g062580	0.15511552670565301	-2.6885849908466901	0.000158129	0.00168045	3.55188227249636	1.8285837642048	0.00364005	0.0251734	C9	18777850	18779237	-	651	-	-	-	-	-	-	-
Bo8g083640	6.7780821641331701E-2	-3.8829790644504598	0.000161292	0.00171259	2.96189738931859	1.56652166139468	0.0142093	0.0722147	C8	29115549	29118683	-	1293	-	GO:0004190;GO:0004190;GO:0004190;GO:0006508;GO:0006508;GO:0006508;GO:0008233;GO:0016787;	-	-	-	106312619	A0A0D3DT06
Bo3g153550	0.38832197983400402	-1.36467472578141	0.000169049	0.00178731	3.53392574812772	1.82127172751452	6.31039e-07	1.57971e-05	C3	54864706	54865620	-	915	-	GO:0003677;GO:0003677;	K09422	-	-	106331423	A0A0D3BJV1
Bo8g106590	0.15616332568187	-2.6788724126573999	0.000173147	0.00182597	3.02826825546489	1.59849301037217	0.0181181	0.0870524	C8	37689174	37690230	-	675	-	GO:0016020;GO:0016021;GO:0016021;GO:0055114;GO:0055114;	K08360	EC:1.16.5.1	-	106310230	A0A0D3DXA9
Bo5g006950	0.15337237040603399	-2.7048894860257202	0.000179701	0.00188813	5.69326073088995	2.50925517149237	0.0433954	0.165729	C5	2115821	2116718	-	543	-	GO:0030246;GO:0030246;GO:0030246;	-	-	-	106343607	A0A0D3C7X7
Bo7g093520	0.23905839844727	-2.0645650044688901	0.000184797	0.00193566	2.38896121091501	1.25638342923382	0.0113507	0.0607669	C7	36048980	36051272	-	1020	-	-	-	-	-	-	-
Bo3g181440	0.246914609382793	-2.01791589485642	0.000191878	0.00200465	2.20890210942879	1.14332948507123	0.0215644	0.0989581	C3	63047629	63049407	+	1257	-	GO:0005975;GO:0006004;GO:0006004;GO:0016020;GO:0016021;GO:0016021;GO:0016740;GO:0016757;GO:0016757;	-	-	-	106328265	A0A0D3BMQ7
Bo1g055120	0.24136990674505701	-2.05068227834707	0.000192097	0.00200548	3.51630101824578	1.81405857985031	8.10101e-05	0.00109559	C1	16062235	16063116	+	543	-	GO:0003700;GO:0003700;GO:0006355;GO:0006355;GO:0008270;GO:0008270;GO:0043565;GO:0043565;GO:0046872;	-	-	-	106309003	A0A0D3A7R4
Bo2g105000	0.43593843957677297	-1.1978036736186599	0.000201166	0.0020854	0.11565718000951	-3.1120732634781	7.55343e-26	8.30877e-23	C2	31005944	31008313	+	1704	-	GO:0005515;GO:0009408;GO:0009644;GO:0009644;GO:0010286;GO:0010286;GO:0042542;GO:0042542;	K09553	-	-	106327650	A0A0D3ASS9
Bo8g106320	4.2434198124448201E-2	-4.5586287745513401	0.000203419	0.00210524	2.97909056941103	1.57487198463274	0.00187901	0.0149204	C8	37545851	37546456	+	297	-	GO:0005507;GO:0005507;GO:0005524;GO:0005524;GO:0005737;GO:0005737;GO:0005739;GO:0005739;GO:0006457;GO:0006457;GO:0009408;GO:0009408;	K04078	-	-	106310363	A0A0D3DX82
Bo1g005590	0.38691459224180402	-1.3699129547392199	0.000208038	0.00214886	0.288762937227175	-1.79204251093745	2.85122e-08	9.65902e-07	C1	1442949	1444483	+	1128	-	GO:0009507;GO:0009941;GO:0009941;	-	-	-	106316930	A0A0D3A1I3
Bo8g005940	0.24962081768811401	-2.0021898388802701	0.000209068	0.00215651	3.91976937085544	1.9707687723733	9.11374e-06	0.000166858	C8	1295444	1296931	-	1176	-	GO:0003677;GO:0003700;GO:0003700;GO:0006355;GO:0006355;	-	-	-	106307142	A0A0D3DJ39
Bo6g122400	0.43417995995316799	-1.2036349565515301	0.000212076	0.00218391	0.474871539502591	-1.07439080120716	0.000191778	0.00226261	C6	39080508	39084296	+	1872	-	GO:0005524;GO:0005524;GO:0015991;GO:0015991;GO:0015992;GO:0033180;GO:0033180;GO:0046034;GO:0046034;GO:0046961;GO:0046961;GO:1902600;GO:1902600;	K02145	EC:3.6.3.14	-	106300805	A0A0D3D1P5
Bo4g023900	0.14489258773323899	-2.78694430202165	0.000216525	0.00222664	4.11299877020612	2.04019064047	1.7108e-06	3.86377e-05	C4	3426277	3426868	+	378	-	GO:0006633;GO:0006633;GO:0006633;	K03955	-	-	106339937	A0A0D3BPW2
Bo3g065560	5.6388423473150401E-2	-4.1484571816214899	0.000223961	0.00229297	9.76066713917764	3.28697975900638	0.00183597	0.0146502	C3	25354185	25357017	+	1794	-	GO:0005524;GO:0005524;GO:0005737;GO:0005737;GO:0042026;GO:0042026;	-	-	-	-	-
Bo3g004970	0.120127208318921	-3.0573651423360202	0.000226047	0.00231114	3.52390563397785	1.81717529110991	5.24922e-06	0.000103218	C3	1893105	1894852	-	888	-	GO:0003677;GO:0003677;GO:0003677;GO:0005634;GO:0005634;GO:0006351;GO:0006351;GO:0006355;GO:0006355;	-	-	-	106335559	A0A0D3B0B2
Bo3g093640	0.118681944877046	-3.0748276208813898	0.000226221	0.00231229	4.35641337724779	2.12314085694958	0.00582658	0.0362646	C3	34163825	34167057	-	1698	-	GO:0004672;GO:0004672;GO:0005524;GO:0005524;GO:0006468;GO:0006468;	-	-	-	106328633	A0A0D3BEB9
Bo3g007200	8.89919506242495E-2	-3.4901813404333701	0.000227847	0.00232444	4.6198438553275	2.20784409126221	0.0248386	0.110362	C3	2574388	2574771	+	384	-	GO:0016020;GO:0016021;GO:0016021;	K17795	-	-	106332070	A0A0D3B0N6
Bo1g124960	0.449947835886852	-1.1521703407107999	0.000248474	0.0025101	0.446831776542987	-1.16219630783326	6.77653e-05	0.00094547	C1	37282617	37288424	+	3456	-	GO:0005515;GO:0006355;GO:0006355;	-	-	-	-	-
Bo8g098740	3.8015193569161401E-2	-4.7172800526404002	0.000250027	0.00252443	301.424668230386	8.23565367995975	5.19442e-12	3.67243e-10	C8	33863136	33865265	+	1611	-	GO:0005515;	-	-	-	106310359	A0A0D3DVC3
Bo9g020480	5.9542543052420502E-2	-4.0699353496101498	0.000252536	0.00254629	6.04316128146032	2.59530344557193	0.0309623	0.129544	C9	6369763	6373224	+	2379	-	GO:0004252;GO:0004252;GO:0006508;GO:0006508;GO:0008236;GO:0008236;GO:0016020;GO:0016020;GO:0070008;GO:0070008;	-	-	-	106318298	A0A0D3E2J8
Bo1g048240	0.11997813725211399	-3.0591565569831598	0.000264236	0.00265133	0.0613923055541794	-4.02579833930044	1.20138e-05	0.000213553	C1	13835628	13836225	+	306	-	GO:0003774;GO:0003774;GO:0005737;GO:0005737;GO:0005856;GO:0005874;GO:0005874;GO:0007017;GO:0007017;GO:0030286;GO:0030286;GO:0030286;	K10418	-	-	106325807	A0A0D3A6X2
Bo9g154220	0.20079348556284601	-2.31621563087075	0.000275531	0.00274763	3.82970550382912	1.93723345624929	0.0212963	0.0981977	C9	45925740	45927662	-	1689	-	GO:0005488;GO:0030001;GO:0030001;GO:0046872;GO:0046872;GO:0046872;	-	-	-	106318660	A0A0D3EE66
Bo9g043720	0.44220581138222198	-1.1772101099927901	0.000279655	0.0027776	0.405510715959915	-1.30218805551767	5.87933e-06	0.000113695	C9	14258984	14261224	+	1272	-	GO:0003824;GO:0005524;GO:0005524;	K01648	EC:2.3.3.8	-	106318558	A0A0D3E586
Bo6g095500	7.9880418708541401E-2	-3.6460142948101502	0.000288727	0.00285551	7.6322350299384	2.93210559892541	0.00517716	0.0331154	C6	29883225	29883911	-	516	-	GO:0005515;GO:0007165;GO:0007165;	-	-	-	-	-
Bo2g005300	0.35644044259304403	-1.4882670570784799	0.000289464	0.00286203	0.483432578506301	-1.04861339533424	0.0371812	0.148154	C2	814996	817594	+	1533	-	GO:0016020;GO:0016021;GO:0016021;	-	-	-	106322902	A0A0D3AHP5
Bo7g114050	0.15509252847783001	-2.6887989081111598	0.000294283	0.00290582	2.35256315746601	1.23423345440543	0.01772	0.085602	C7	45180744	45181858	-	411	-	GO:0016020;GO:0016021;GO:0016021;	-	-	-	-	-
Bo5g135100	0.36984204579527502	-1.4350188468565701	0.000295201	0.00291251	2.69624104332521	1.43094947888809	3.9592e-05	0.000596832	C5	42022001	42025266	-	1677	-	GO:0000166;GO:0005524;GO:0005524;GO:0005524;GO:0005737;GO:0005737;GO:0006457;GO:0006457;GO:0051082;GO:0051082;	K09499	-	-	106295670	A0A0D3CL23
Bo3g040050	0.186755312609032	-2.4207788110927302	0.000298499	0.00293731	4.39380938618963	2.13547228360646	0.000120419	0.00153343	C3	16216823	16217134	+	312	-	GO:0000786;GO:0000786;GO:0000786;GO:0003677;GO:0003677;GO:0003677;GO:0005634;GO:0005634;GO:0005634;GO:0005694;GO:0005730;GO:0005774;GO:0005829;GO:0005886;GO:0006334;GO:0006334;GO:0009414;GO:0009506;GO:0009507;GO:0009579;GO:0046982;GO:0046982;	-	-	-	-	-
Bo5g027050	6.5065070981408804E-2	-3.9419729235802099	0.000300111	0.0029524	15.8328908811255	3.98485279187137	0.000334734	0.00359226	C5	9301809	9302357	+	258	-	-	-	-	-	-	-
Bo7g033090	0.29313845047085202	-1.7703458785987201	0.000305877	0.00300203	2.73897959800145	1.45363851979584	0.0219538	0.10018	C7	12946608	12948103	+	492	-	-	-	-	-	-	-
Bo7g078690	0.328642477990855	-1.6054091300403599	0.000349944	0.00337484	2.55870507939752	1.35541386953035	0.000536939	0.00537658	C7	29957088	29959451	-	1401	-	GO:0004579;GO:0004579;GO:0004579;GO:0005783;GO:0005783;GO:0005783;GO:0005789;GO:0005789;GO:0006486;GO:0006486;GO:0006486;GO:0016020;GO:0016021;GO:0016021;GO:0016021;GO:0016740;GO:0016757;	K12666	-	-	106307065	A0A0D3DA60
Bo8g090450	0.44978696622672298	-1.15268623909069	0.000359333	0.00345911	0.460188879643413	-1.1197019732922	0.000118023	0.00150908	C8	30329542	30332819	-	1479	-	GO:0004672;GO:0004672;GO:0005524;GO:0005524;GO:0006468;GO:0006468;GO:0016020;GO:0016021;GO:0016021;	-	-	-	106312372	A0A0D3DTJ2
Bo5g145460	0.44111402202845101	-1.18077647367877	0.0003598	0.00346271	0.384827790963443	-1.37771510545357	0.000222623	0.00257455	C5	45100922	45105195	+	2091	-	GO:0006508;GO:0009507;GO:0009570;GO:0009570;GO:0016787;GO:0016787;GO:0016787;GO:0046872;GO:0046872;GO:0070006;GO:0070006;	K01262	EC:3.4.11.9	-	106295317	A0A0D3CML4
Bo7g075480	0.42960816675785501	-1.2189066759842699	0.00036008	0.00346451	0.38016284600935	-1.39531055316202	1.2757e-05	0.00022389	C7	28267740	28273404	+	5103	-	-	K17592	-	-	106305777	A0A0D3D9I8
Bo1g003710	0.16247214454689499	-2.6217357020929501	0.000378977	0.00362665	0.248220726357609	-2.01030450977805	0.0459776	0.172751	C1	917568	919327	-	1497	-	GO:0004497;GO:0004497;GO:0005506;GO:0005506;GO:0016491;GO:0016705;GO:0016705;GO:0020037;GO:0020037;GO:0046872;GO:0055114;GO:0055114;GO:0055114;	K00517	EC:1.14.-.-	-	106324414	A0A0D3A194
Bo2g149950	0.109748205339696	-3.1877307466409901	0.000383051	0.00365998	4.58052284426819	2.19551228430063	0.00993874	0.0547517	C2	47211519	47214180	-	1788	-	GO:0005507;GO:0005507;GO:0005886;GO:0005886;GO:0009506;GO:0009506;GO:0016491;GO:0016491;GO:0055114;GO:0055114;	-	-	-	106320914	A0A0D3AWV5
Bo7g088640	0.41214405904435802	-1.27877939596895	0.000387823	0.00369893	0.448074791126518	-1.15818853273481	0.00311444	0.0222206	C7	34068985	34071545	+	1398	-	GO:0004497;GO:0004497;GO:0005506;GO:0005506;GO:0016491;GO:0016705;GO:0016705;GO:0020037;GO:0020037;GO:0046872;GO:0055114;GO:0055114;GO:0055114;	-	-	-	106301844	A0A0D3DBL0
Bo5g150090	0.440918390632075	-1.1814164421107001	0.00039727	0.00377356	2.6719819098782	1.41791024036535	4.33464e-06	8.73939e-05	C5	46156570	46157519	+	480	-	GO:0005737;GO:0005737;GO:0005886;GO:0005886;GO:0006950;GO:0006950;GO:0016020;GO:0043621;GO:0043621;	-	-	-	106292588	A0A0D3CN30
Bo8g016350	0.17205695607313901	-2.5390418750626398	0.000399713	0.0037919	2.32864595149337	1.21949130813929	0.0362197	0.14562	C8	3356605	3357547	+	291	-	-	-	-	-	-	-
Bo02561s010	0.43604000816841898	-1.1974675815867499	0.000406182	0.00384741	0.405677340240514	-1.30159537414162	4.70856e-05	0.000692217	Scaffold02561	39	1363	+	1104	-	GO:0000287;GO:0000287;GO:0003824;GO:0003824;GO:0004743;GO:0004743;GO:0006096;GO:0006096;GO:0030955;GO:0030955;	K00873	EC:2.7.1.40	-	106321705	A0A0D2ZW76
Bo7g084050	0.19516569566737199	-2.3572286026413001	0.000413386	0.00391166	3.89388880127533	1.96121168525511	0.000508087	0.00512334	C7	32971341	32973490	-	1320	-	GO:0016020;GO:0016021;GO:0016021;GO:0016740;GO:0016746;GO:0019706;GO:0019706;	K16675	EC:2.3.1.225	-	106307116	A0A0D3DB48
Bo2g028960	0.29720111034035102	-1.7504885891066599	0.000431465	0.00406167	2.11110292438168	1.07799691732803	0.00290112	0.0210315	C2	8713570	8716224	-	2166	-	GO:0005216;GO:0005216;GO:0005223;GO:0005223;GO:0005262;GO:0005262;GO:0005515;GO:0005886;GO:0005886;GO:0006811;GO:0006811;GO:0006811;GO:0016020;GO:0016020;GO:0016020;GO:0016020;GO:0016021;GO:0016021;GO:0034220;GO:0055085;GO:0055085;GO:0070588;GO:0098655;	K05391	-	-	106326694	A0A0D3ALC2
Bo4g006880	0.42417631630336	-1.2372640240084301	0.000459194	0.00429489	0.496875789839796	-1.00904284627561	0.00233892	0.0177977	C4	654638	658602	-	2694	-	GO:0005829;GO:0005829;	-	-	-	-	-
Bo2g063070	4.2246788395362403E-2	-4.5650145180176303	0.000460871	0.00430841	12.3168067631869	3.62255636844877	6.85217e-05	0.000953389	C2	18676984	18680317	-	2931	-	GO:0003676;GO:0003676;GO:0005515;GO:0031047;GO:0031047;	K11593	-	-	106322690	A0A0D3APA7
Bo2g014000	0	-Inf	0.000462679	0.00431988	Inf	Inf	1.72763e-14	2.15377e-12	C2	4506330	4507019	-	474	-	-	-	-	-	106326049	A0A0D3AJL7
Bo3g083290	0.448105925457773	-1.1580882910213099	0.000464753	0.00433381	0.447988291325883	-1.15846706855722	0.00117318	0.0102015	C3	30761440	30765232	-	1506	-	GO:0008152;GO:0008152;GO:0009699;GO:0009699;GO:0016491;GO:0016491;GO:0016491;GO:0016620;GO:0016620;GO:0050269;GO:0050269;GO:0055114;GO:0055114;GO:0055114;	-	-	-	106335834	A0A0D3BD28
Bo11959s010	0.452477236250864	-1.1440828816397699	0.000467953	0.00435928	0.263774845474921	-1.92262110436508	6.75309e-11	3.83256e-09	Scaffold11959	1	505	+	365	-	GO:0006950;GO:0006950;GO:0009415;GO:0009415;	-	-	-	-	-
Bo6g124520	0.44189910730211102	-1.17821107823489	0.000482834	0.00448187	0.276799969763938	-1.85308430950456	1.59355e-08	5.69803e-07	C6	39638630	39641530	-	2298	-	GO:0004427;GO:0004427;GO:0009678;GO:0009678;GO:0015992;GO:0016020;GO:0016020;GO:0016020;GO:0016021;GO:0016021;GO:0055085;GO:1902600;GO:1902600;	K01507	EC:3.6.1.1	-	106299969	A0A0D3D208
Bo2g028200	0.25088611707368202	-1.9948954542841399	0.000484889	0.00449792	4.34354953062708	2.11887448904714	0.00131337	0.011156	C2	8266206	8267844	+	1557	-	-	-	-	-	-	-
Bo2g013690	0.22306218228262101	-2.1644821535062602	0.000506301	0.00467324	0	-Inf	2.12041e-06	4.67123e-05	C2	4308137	4309363	+	1227	-	GO:0005515;	-	-	-	-	-
Bo6g003240	0.30083754552379599	-1.73294346350761	0.00051505	0.00474347	0.407085522080787	-1.29659618167196	0.00758221	0.0443432	C6	317124	319371	-	1266	-	GO:0004190;GO:0004190;GO:0004190;GO:0006508;GO:0006508;GO:0006508;GO:0008233;GO:0016787;	-	-	-	-	-
Bo5g137210	0.240051821858736	-2.0585822096028301	0.000518598	0.00477372	2.99323191915061	1.58170406488546	0.0445813	0.168947	C5	42714098	42715712	-	1518	-	GO:0016020;GO:0016021;GO:0016021;	-	-	-	106294440	A0A0D3CLD5
Bo1g049510	0.31141489543878897	-1.68309014256506	0.000518938	0.00477567	2.4782061369611	1.30929619571202	0.00168879	0.0137097	C1	14083549	14085182	-	999	-	GO:0016020;GO:0016021;GO:0016021;	-	-	-	106308234	A0A0D3A700
Bo3g035200	0.113142720632377	-3.1437843272988899	0.000519565	0.00478026	3.83655574440567	1.93981171713005	0.0307351	0.128881	C3	13631617	13632844	-	1032	-	-	-	-	-	106329333	A0A0D3B645
Bo7g084310	7.5115159745774499E-2	-3.73475208785529	0.000568011	0.00517481	4.89991301389676	2.29275613789444	0.04679	0.174964	C7	33082486	33083131	-	564	-	GO:0009055;GO:0009055;GO:0016020;GO:0016021;GO:0016021;GO:0022900;	-	-	-	106307067	A0A0D3DB74
Bo1g011790	0.104061256354699	-3.2644950643767801	0.00058532	0.00531429	4.53274628027238	2.18038540886627	0.0186749	0.088985	C1	4258684	4260080	+	777	-	GO:0003723;GO:0003723;GO:0003735;GO:0003735;GO:0005622;GO:0005622;GO:0005840;GO:0005840;GO:0006412;GO:0006412;	K02888	-	-	106293429	A0A0D3A304
Bo6g068050	0.28519681459671098	-1.80997022667917	0.000599288	0.00542918	2.6874342816643	1.42622947556675	0.00167406	0.0136197	C6	19361000	19363025	-	1422	-	GO:0003824;GO:0003824;GO:0004588;GO:0004588;GO:0004590;GO:0004590;GO:0006207;GO:0006207;GO:0006221;GO:0006221;GO:0008152;GO:0008152;GO:0009116;GO:0009116;GO:0044205;GO:0044205;	K13421	-	-	106296458	A0A0D3CTT3
Bo2g003950	0.39750361046919702	-1.3309601306354	0.000606681	0.00548548	0.189143816692697	-2.40244448092457	7.9423e-05	0.00107702	C2	596804	598935	-	1683	-	GO:0005507;GO:0005507;GO:0005576;GO:0016491;GO:0016491;GO:0016491;GO:0046274;GO:0046274;GO:0046274;GO:0046872;GO:0048046;GO:0048046;GO:0048046;GO:0052716;GO:0052716;GO:0052716;GO:0055114;GO:0055114;GO:0055114;	K05909	EC:1.10.3.2	-	106320465	A0A0D3AHK9
Bo1g021640	2.0264141464904101E-2	-5.6249271360560504	0.000616886	0.00556558	17.6438034648461	4.14108969027195	0.029325	0.124944	C1	7756669	7758693	+	1212	-	GO:0005634;GO:0005634;	K15188	-	-	106305686	A0A0D3A4E4
Bo01983s010	0.242815665152606	-2.0420665954150699	0.000622741	0.00561161	4.20838282886907	2.07326594992229	1.69822e-05	0.000286346	Scaffold01983	1	3275	-	2288	-	GO:0003677;GO:0003677;GO:0003899;GO:0003899;GO:0006351;GO:0006351;GO:0032549;GO:0032549;	-	-	-	-	-
Bo4g043710	0.113205919158337	-3.1429787010539298	0.000624816	0.00562758	5.82070138527359	2.54119300606968	1.42072e-05	0.000245653	C4	9693838	9695373	-	696	-	GO:0016554;	-	-	-	106337368	A0A0D3BSF4
Bo3g031620	0.308277876462411	-1.6976967366236499	0.00062557	0.00563301	3.22017228493941	1.6871378771531	4.67759e-05	0.000689562	C3	11746927	11749182	-	2256	-	GO:0003729;GO:0003729;GO:0005515;GO:0009409;GO:0009409;GO:0009534;GO:0009535;GO:0009535;	-	-	-	106332626	A0A0D3B5D6
Bo4g030810	0.25461334793622398	-1.9736200413330101	0.000634608	0.00570749	0.311685059107161	-1.68183909510095	6.82431e-09	2.61238e-07	C4	6844543	6845670	-	858	-	GO:0015267;GO:0015267;GO:0016020;GO:0016020;GO:0016020;GO:0016021;GO:0016021;GO:0055085;GO:0055085;	K09872	-	-	106342548	A0A0D3BRA5
Bo4g019840	0.36420485794327101	-1.4571779290692499	0.000637493	0.00573205	0.368739926182303	-1.43932445880106	0.0194616	0.0918906	C4	2658832	2661631	+	2484	-	GO:0003677;GO:0003677;GO:0005515;GO:0005634;GO:0005634;GO:0006351;GO:0006351;GO:0006355;GO:0006355;	-	-	-	106336652	A0A0D3BPK3
Bo4g176270	0.17845292391137499	-2.4863845550701602	0.000642736	0.00577083	34.9825859328024	5.12856503293305	1.57743e-08	5.65096e-07	C4	46768720	46771539	-	1743	-	GO:0004672;GO:0004672;GO:0005509;GO:0005509;GO:0005524;GO:0005524;GO:0006468;GO:0006468;	K13412	EC:2.7.11.1	-	106339257	-
Bo9g010950	0.32554693904413401	-1.61906252125392	0.000645289	0.00578955	6.14023043332376	2.61829279871847	6.78185e-05	0.00094547	C9	3388371	3393673	-	3564	-	GO:0003824;GO:0005524;GO:0005524;GO:0016301;GO:0016301;GO:0016310;GO:0016310;GO:0030246;GO:0030246;GO:2001070;GO:2001070;	K15535	EC:2.7.9.5	-	106315486	A0A0D3E190
Bo8g059100	0.22062175132783499	-2.1803530601419698	0.000663067	0.00593048	4.42710053558021	2.14636213615005	0.0035954	0.0249616	C8	19215504	19217218	-	960	-	GO:0046983;GO:0046983;	-	-	-	-	-
Bo6g039620	0.20477882143165699	-2.28786157776943	0.000667781	0.00596547	3.27472845115457	1.71137527965309	0.00336335	0.0236313	C6	9686667	9687626	-	960	-	GO:0000077;GO:0000077;GO:0005730;GO:0005730;GO:0030896;GO:0030896;	K10903	-	-	106296403	A0A0D3CRC0
Bo9g176100	7.7412845456322807E-2	-3.6912832107629798	0.000687068	0.00612013	2.38559605342074	1.25434977603252	0.0171976	0.0836941	C9	52352053	52353114	-	804	-	GO:0003700;GO:0003700;GO:0006355;GO:0006355;	K08064	-	-	106316015	A0A0D3EHB5
Bo2g158870	0.27954033095060299	-1.83887165058505	0.000689001	0.00613588	3.10264235856835	1.63349740706435	0.000340548	0.00364733	C2	49574689	49576648	+	1113	-	GO:0016020;GO:0016021;GO:0016021;	K20782	EC:2.4.2.58	-	106324665	A0A0D3AXQ3
Bo9g152580	7.3646022005937103E-2	-3.76324858966366	0.000689263	0.00613674	5.39598862239245	2.43188730632263	0.0368886	0.147314	C9	45584987	45587476	-	1779	-	GO:0006486;GO:0006486;GO:0016020;GO:0016021;GO:0016021;GO:0016757;GO:0016757;	-	-	-	106317865	A0A0D3EE01
Bo8g102330	0.46778313827079299	-1.0960882357013799	0.000706371	0.00627705	0.173456513444903	-2.52735407877603	4.63639e-18	1.19587e-15	C8	36030759	36032117	+	1185	-	GO:0006457;GO:0006457;GO:0051082;GO:0051082;	-	-	-	-	-
Bo4g061330	0.35931116724694301	-1.4766943204673499	0.000770424	0.00679434	4.81274635641965	2.26686039172621	5.3026e-06	0.000104213	C4	13769134	13771639	-	1941	-	GO:0009228;GO:0009228;GO:0009228;GO:0009507;GO:0009536;GO:0009570;GO:0009570;GO:0010266;GO:0010266;GO:0016830;GO:0016830;GO:0019904;GO:0019904;GO:0051536;GO:0051536;GO:0051536;GO:0080041;GO:0080041;	K03147	EC:4.1.99.17	-	106342079	A0A0D3BTS9
Bo7g107580	0.46703398334771501	-1.09840056460242	0.000802504	0.00704054	0.378670850879783	-1.40098372439046	3.69108e-06	7.61845e-05	C7	42125190	42127210	+	876	-	GO:0016020;GO:0016021;GO:0016021;	-	-	-	106301628	A0A0D3DFB0
Bo3g018810	0.341404291228528	-1.5504469026751699	0.000805897	0.00706531	2.06819678542207	1.048373462174	0.00861596	0.0489647	C3	6343514	6345560	-	1968	-	GO:0000166;GO:0004672;GO:0004672;GO:0005515;GO:0005524;GO:0005524;GO:0005524;GO:0005886;GO:0006468;GO:0006468;GO:0016020;GO:0016021;GO:0016021;	-	-	-	106335878	A0A0D3B2V1
Bo3g175070	0.24386742117836299	-2.03583105689997	0.000807495	0.00707433	4.55065038104152	2.18607275068471	2.56139e-05	0.000405744	C3	61198307	61199945	+	876	-	GO:0004519;GO:0004519;GO:0006281;GO:0006281;GO:0090305;	K21813	EC:3.1.26.-	-	106331911	A0A0D3BM16
Bo4g024930	0.15805968853532201	-2.6614586245075702	0.000829593	0.00724405	3.01650204600111	1.59287656090069	0.024725	0.110033	C4	4063745	4066756	+	2019	-	GO:0008168;GO:0008168;GO:0016020;GO:0016021;GO:0016021;GO:0032259;	-	-	-	-	-
Bo3g060300	0.36805863232620201	-1.4419924866802301	0.000848615	0.007398	2.54296507757385	1.34651164969732	0.000273299	0.00305846	C3	22859533	22862469	+	1668	-	GO:0000166;GO:0005524;GO:0005524;GO:0005524;GO:0005737;GO:0005737;GO:0006457;GO:0006457;GO:0051082;GO:0051082;	K09495	-	-	106336220	A0A0D3B9W7
Bo2g010540	0.44243660233268001	-1.1764573516757499	0.00086797	0.00753671	0.351776937800839	-1.50726719084659	5.13478e-06	0.000101234	C2	2561686	2562752	-	651	-	-	-	-	-	106322462	A0A0D3AIM1
Bo1g147320	4.7571957218547498E-2	-4.3937448074971597	0.000878789	0.0076129	6.59794989927535	2.7220178230163	0.00296104	0.0213667	C1	41623242	41624162	+	504	-	GO:0005773;	-	-	-	106327726	A0A0D3AF51
Bo4g125760	0.28551788554068103	-1.8083469725124399	0.000882385	0.00763872	0.00812995339697749	-6.94253720224397	2.48625e-09	1.03779e-07	C4	32691062	32692689	-	807	-	GO:0003677;GO:0003700;GO:0003700;GO:0005634;GO:0005634;GO:0005634;GO:0006355;GO:0006355;GO:0043565;GO:0043565;	K09419	-	-	106336820	A0A0D3BYM0
Bo5g139260	0.32392888466003	-1.6262509762516499	0.000888009	0.00768562	0.291539979577284	-1.77823435766084	0.042292	0.162444	C5	43271872	43274576	-	2274	-	GO:0016020;GO:0016021;GO:0016021;	-	-	-	106343363	A0A0D3CLP1
Bo4g024400	0.34165869478894001	-1.54937225281279	0.000891727	0.00771421	2.05556913165656	1.03953789256395	0.0312932	0.130434	C4	3748608	3751941	-	2190	-	GO:0000463;GO:0000463;GO:0000466;GO:0000466;GO:0005515;GO:0005634;GO:0005654;GO:0005654;GO:0005730;GO:0005730;GO:0006364;GO:0006364;GO:0006364;GO:0030687;GO:0030687;GO:0042254;GO:0042254;GO:0042254;GO:0042273;GO:0043021;GO:0043021;	-	-	-	-	-
Bo6g081240	6.5577861007424396E-2	-3.9306473445290901	0.000894109	0.00772942	9.48175346916289	3.24515388268255	0.00231375	0.0176501	C6	25054704	25057120	+	1011	-	-	-	-	-	-	-
Bo6g098710	0.33325818672091501	-1.5852877783230299	0.000899123	0.00776555	3.72758055925901	1.89823953190176	0.0225644	0.10228	C6	31128519	31130367	+	1608	-	GO:0000160;GO:0000160;GO:0000160;GO:0003677;GO:0003677;GO:0003677;GO:0003700;GO:0003700;GO:0003700;GO:0005634;GO:0005634;GO:0006351;GO:0006351;GO:0006355;GO:0007165;GO:0007165;	K14491	-	-	106300628	A0A0D3CY15
Bo7g031310	2.8131968037013001E-2	-5.1516457065169803	0.000980793	0.00839108	38.6263165794102	5.27151220305556	8.58974e-28	1.28503e-24	C7	11956351	11957753	+	888	-	GO:0005783;GO:0005783;GO:0006621;GO:0006621;GO:0016020;GO:0016021;GO:0016021;GO:0016021;GO:0046923;GO:0046923;	-	-	-	-	-
Bo1g048300	0.34339116176274498	-1.54207518730372	0.00101829	0.00866824	0.267929636159171	-1.90007392589398	0.0154796	0.0770476	C1	13854254	13855353	-	903	-	GO:0003677;GO:0003677;GO:0003677;GO:0003700;GO:0003700;GO:0005634;GO:0005634;GO:0005634;GO:0006351;GO:0006351;GO:0006355;GO:0006355;GO:0006355;GO:0009414;GO:0009414;GO:0009737;GO:0009737;GO:0043565;GO:0043565;GO:0045893;GO:0045893;	-	-	-	-	-
Bo5g131860	0	-Inf	0.00108694	0.00917062	Inf	Inf	0.0298789	0.126468	C5	40712262	40712798	+	537	-	GO:0016020;GO:0016021;GO:0016021;	-	-	-	-	-
Bo2g140640	0.22531660684299701	-2.14997444430964	0.00108814	0.00917646	4.07935155294097	2.02833984197469	3.86761e-05	0.000584203	C2	45434329	45435811	+	423	-	-	-	-	-	106325183	A0A0D3AW67
Bo9g126080	8.2978471995449804E-2	-3.5911190987845401	0.00108837	0.00917646	11.5120192876805	3.52506900922708	0.000620568	0.00605511	C9	39570645	39572509	+	1269	-	-	-	-	-	106313404	A0A0D3EBT2
Bo6g106820	6.9413599115778199E-2	-3.84863785471024	0.00109545	0.00920898	4.78830216369039	2.25951419578659	0.0209902	0.0970975	C6	33237034	33238040	+	702	-	GO:0016020;GO:0016021;GO:0016021;	-	-	-	-	-
Bo4g006930	0.489631593835894	-1.03023144290299	0.00112523	0.00943491	0.266862001448168	-1.90583420051668	1.17051e-06	2.74016e-05	C4	680047	682607	-	1608	-	GO:0003677;GO:0003677;GO:0003677;GO:0003677;GO:0005634;GO:0005634;GO:0005634;GO:0006351;GO:0006351;GO:0006355;GO:0007623;GO:0007623;GO:0009409;GO:0009409;GO:0009651;GO:0009651;GO:0009723;GO:0009723;GO:0009733;GO:0009733;GO:0009737;GO:0009737;GO:0009739;GO:0009739;GO:0009751;GO:0009751;GO:0009753;GO:0009753;GO:0010243;GO:0010243;GO:0010468;GO:0042754;GO:0042754;GO:0043496;GO:0043496;GO:0043565;GO:…	K12134	-	-	106342972	-
Bo2g009210	0.48216550138526698	-1.05239966410638	0.00113727	0.00950688	0.353064459818013	-1.50199649107921	5.41371e-07	1.37737e-05	C2	1835395	1838332	-	1302	-	-	-	-	-	106322513	A0A0D3AI88
Bo2g140330	0.36422994820893001	-1.4570785444666801	0.00113848	0.00951484	5.43863447869496	2.44324446799952	7.10252e-07	1.76033e-05	C2	45186608	45187606	-	999	-	GO:0009263;GO:0009263;GO:0016491;GO:0016491;GO:0055114;GO:0055114;	K10808	EC:1.17.4.1	-	106322519	A0A0D3AW36
Bo3g013790	6.20265668293749E-2	-4.0109699158292296	0.00114005	0.00952308	8.57173578969262	3.09958738188862	0.00129856	0.0110579	C3	4862863	4864802	+	870	-	GO:0009507;GO:0009941;GO:0016020;GO:0016021;GO:0016021;GO:0016021;	K13348	-	-	106328754	A0A0D3B1Z7
Bo3g004640	3.9563874785950102E-2	-4.6596724628504997	0.001153	0.00962106	6.91733061962729	2.79021541289154	4.47306e-05	0.000663858	C3	1735063	1735586	-	165	-	GO:0005742;GO:0005742;GO:0016020;GO:0016021;GO:0016021;	-	-	-	106327933	A0A0D3B079
Bo7g109930	0.28641892922061901	-1.8038012524588101	0.00115392	0.00962659	2.28840793630271	1.1943442528251	0.0143437	0.0727075	C7	43538870	43540242	+	939	-	GO:0015995;GO:0015995;GO:0032259;GO:0046406;GO:0046406;	K03428	EC:2.1.1.11	-	106305850	A0A0D3DFZ4
Bo5g126800	0.39729577692335399	-1.33171463658371	0.0011624	0.00968651	2.60552398339368	1.38157353458673	9.90881e-05	0.00129804	C5	39133171	39135184	-	510	-	GO:0004129;GO:0004129;GO:0005740;GO:0005740;GO:0022900;GO:1902600;	K02265	-	-	106296037	A0A0D3CJT9
Bo5g127620	0.177292398608319	-2.4957974127126499	0.0011718	0.00975848	2.76801005073268	1.4688491814558	0.0154986	0.0771217	C5	39664746	39666563	+	1818	-	GO:0009507;GO:0009507;GO:0009793;GO:0009793;	-	-	-	106295061	A0A0D3CK21
Bo3g181110	0.193180720927457	-2.3719769717808998	0.00117431	0.00977481	4.09178999441334	2.03273210261179	0.000824727	0.00762729	C3	62763805	62764398	-	438	-	GO:0009507;GO:0009522;GO:0009522;GO:0009534;GO:0009535;GO:0009535;GO:0009538;GO:0009538;GO:0009579;GO:0009735;GO:0009735;GO:0010287;GO:0010287;GO:0015979;GO:0015979;GO:0016020;	K02695	-	-	106332078	A0A0D3BMM4
Bo1g147760	0.26268558387536201	-1.92859106701654	0.00120951	0.0100386	2.44683602081527	1.29091741981387	0.00240208	0.0181821	C1	41854226	41854494	+	186	-	GO:0003735;GO:0003735;GO:0003735;GO:0005622;GO:0005622;GO:0005840;GO:0005840;GO:0005840;GO:0006412;GO:0006412;GO:0030529;	-	-	-	-	-
Bo7g097060	6.8643861705291104E-2	-3.8647254728003402	0.00121171	0.0100479	3.38495328534683	1.75913592376674	0.00112641	0.00987519	C7	37660004	37666053	+	3024	-	GO:0016020;GO:0016021;GO:0016021;	-	-	-	-	-
Bo1g040420	0.476564343711813	-1.0692570809892601	0.00123119	0.0101935	0.243876181499249	-2.03577923265695	5.31339e-11	3.06195e-09	C1	12607476	12609523	-	1062	-	GO:0005506;GO:0005506;GO:0008610;GO:0008610;GO:0016020;GO:0016021;GO:0016021;GO:0016491;GO:0016491;GO:0055114;GO:0055114;	-	-	-	-	-
Bo1g148950	0.39258891443044502	-1.3489086590216901	0.00124761	0.0103066	2.61034049755662	1.38423800683203	0.000119327	0.00152211	C1	42013423	42015251	+	1335	-	GO:0046872;GO:0046872;GO:0046872;	-	-	-	106329184	A0A0D3AFB5
Bo9g026070	0.35005284701056599	-1.51435535464492	0.00128743	0.0106012	2.10930873096275	1.07677027200752	0.00876229	0.0496004	C9	8277978	8281368	-	2100	-	GO:0000166;GO:0005524;GO:0005524;GO:0005524;GO:0005739;GO:0007005;	-	-	-	-	-
Bo9g172010	0.48533186185687299	-1.0429565192814101	0.00130439	0.0107043	0.3952871928361	-1.3390268817768	8.46146e-06	0.000155891	C9	50810218	50813740	+	2043	-	GO:0016020;GO:0016020;GO:0016020;GO:0016021;GO:0016021;GO:0055085;GO:0055085;	K22047	-	-	106319141	A0A0D3EGF5
Bo8g064890	0.13389362095333801	-2.9008408663999701	0.00130699	0.010721	0.128457817876675	-2.96063340029915	0.0365758	0.146488	C8	20366868	20369767	-	1713	-	GO:0016614;GO:0016614;GO:0050660;GO:0050660;GO:0055114;GO:0055114;	-	-	-	106308314	A0A0D3DPC5
Bo5g051850	0.24408145637971701	-2.0345654015923098	0.00137357	0.0111833	2.86212468394042	1.51708652216393	0.00590497	0.0366452	C5	17083969	17087000	-	948	-	GO:0004316;GO:0004316;GO:0006633;GO:0006633;GO:0016491;GO:0016491;GO:0051287;GO:0051287;GO:0055114;GO:0055114;	K00059	EC:1.1.1.100	-	106343818	A0A0D3CDZ0
Bo3g002290	0.49500558268794298	-1.0144832988450301	0.00137987	0.0112223	0.281055960789758	-1.8310706821783	6.8303e-11	3.8705e-09	C3	592320	595256	-	2433	-	GO:0005524;GO:0005524;GO:0005618;GO:0005794;GO:0005829;GO:0016787;GO:0016787;	K13525	-	-	106334492	A0A0D3AZJ4
Bo7g099160	0.38482353561282501	-1.3777310585820099	0.00139758	0.0113564	2.39261408416345	1.25858771665815	0.000681662	0.00652525	C7	38884822	38886264	-	1443	-	-	K14798	-	-	106306869	A0A0D3DDR5
Bo8g059510	0.31213319419077401	-1.6797663042822299	0.00141351	0.0114733	0.109692784174193	-3.18845946958841	0.0054683	0.0346166	C8	19465725	19467605	-	954	-	GO:0004553;GO:0004553;GO:0005576;GO:0005618;GO:0005618;GO:0005618;GO:0005887;GO:0005887;GO:0005975;GO:0005975;GO:0006073;GO:0006073;GO:0008152;GO:0009831;GO:0009831;GO:0010411;GO:0010411;GO:0016740;GO:0016762;GO:0016762;GO:0016762;GO:0016787;GO:0016798;GO:0042546;GO:0042546;GO:0048046;GO:0048046;GO:0048046;GO:0071555;	K08235	EC:2.4.1.207	-	106309851	A0A0D3DNY3
Bo9g014740	0.38359220244500902	-1.3823547009344801	0.00143643	0.0116391	0.304549333569278	-1.71525214744279	1.77788e-09	7.58183e-08	C9	4517798	4520864	-	1854	-	GO:0005509;GO:0005509;GO:0005515;GO:0005783;GO:0005783;GO:0005783;GO:0006457;GO:0006457;GO:0016020;GO:0016021;GO:0016021;GO:0051082;GO:0051082;	-	-	-	-	-
Bo4g039130	6.9825334007867904E-2	-3.8401056201546799	0.00148697	0.0119885	6.44971711706771	2.68923588569042	0.0279694	0.120541	C4	8571345	8572274	-	930	-	GO:0006506;GO:0006506;GO:0009846;GO:0009846;GO:0009860;GO:0009860;GO:0016020;GO:0016021;GO:0016021;GO:0016021;GO:0017176;GO:0017176;	K03859	-	-	106339790	A0A0D3BRZ3
Bo8g059220	2.68625919585232E-2	-5.2182576733453701	0.00152878	0.0122751	25.4954365492482	4.67216713581691	0.0012545	0.0107586	C8	19283600	19284689	-	570	-	GO:0046872;GO:0046872;	-	-	-	-	-
Bo8g068360	0	-Inf	0.00153281	0.0122915	Inf	Inf	0.0308181	0.129099	C8	22356162	22367653	+	2262	-	GO:0008152;GO:0008152;GO:0016787;GO:0016787;	-	-	-	-	-
Bo01074s030	0.32483838690309003	-1.62220596568211	0.00154836	0.0123815	2.74901099295648	1.45891267602224	0.000678481	0.00650224	Scaffold01074	12723	14897	+	1935	-	GO:0016020;GO:0016021;GO:0016021;GO:0016740;GO:0016757;GO:0016757;	K20890	EC:2.4.1.-	-	106320810	A0A0D2ZTF6
Bo9g061270	2.29499826682346E-2	-5.4453631256546604	0.00156157	0.0124765	25.1218167661706	4.65086889609015	0.00454893	0.03	C9	18482616	18483004	+	213	-	GO:0000272;GO:0000272;GO:0016161;GO:0016161;	-	-	-	-	-
Bo5g009100	0.29046180518062198	-1.78357962867344	0.00157288	0.012556	2.16050649383307	1.11136956724178	0.0260617	0.114228	C5	3260594	3261424	-	375	-	-	-	-	-	106295775	-
Bo3g173520	0.12755851541963401	-2.9707688827865799	0.00157499	0.0125686	4.21231237979754	2.07461242878382	0.0180244	0.0867474	C3	60752379	60752819	-	156	-	GO:0003735;GO:0003735;GO:0005622;GO:0005622;GO:0005840;GO:0005840;GO:0006412;GO:0006412;	K02924	-	-	106340095	A0A0D3BLW0
Bo8g110700	0.31783165395584001	-1.6536652800468401	0.00158351	0.0126193	3.96229518830873	1.98633636403491	2.14578e-06	4.71374e-05	C8	39394668	39398259	-	1611	-	GO:0000166;GO:0003824;GO:0004075;GO:0005524;GO:0005524;GO:0005524;GO:0016874;GO:0016874;GO:0046872;GO:0046872;	K01961	-	-	106309458	A0A0D3DY71
Bo9g120630	0.121418146560878	-3.0419440390522001	0.0016538	0.0131176	3.88883142680373	1.95933669813408	0.000629396	0.00612686	C9	38348694	38351017	+	1404	-	GO:0016757;GO:0016757;	-	-	-	-	-
Bo2g025530	0.28330024369580498	-1.8195962521597799	0.00166653	0.0132045	3.66118687330048	1.87231141316808	5.13691e-05	0.000745809	C2	7748533	7748844	-	312	-	GO:0000786;GO:0000786;GO:0000786;GO:0003677;GO:0003677;GO:0003677;GO:0005634;GO:0005634;GO:0005634;GO:0005694;GO:0005730;GO:0005730;GO:0005773;GO:0005774;GO:0005774;GO:0005829;GO:0005829;GO:0005886;GO:0005886;GO:0006334;GO:0006334;GO:0009414;GO:0009414;GO:0009506;GO:0009506;GO:0009507;GO:0009507;GO:0009579;GO:0009579;GO:0046982;GO:0046982;	-	-	-	-	-
Bo5g017950	0.454078903386542	-1.1389850845215801	0.00167437	0.0132553	5.22825915745104	2.3863306552693	3.28157e-06	6.85263e-05	C5	6098791	6100915	-	1515	-	-	-	-	-	106295632	A0A0D3C9Y1
Bo8g051230	0.391512875929035	-1.3528683397759	0.00167709	0.0132741	2.00908887682921	1.00654138653243	0.00758084	0.0443421	C8	17143707	17144352	+	369	-	GO:0000276;GO:0000276;GO:0015078;GO:0015078;GO:0015986;GO:0015986;	K02140	-	-	106309722	A0A0D3DN00
Bo6g071060	0.32600661150948002	-1.61702687185672	0.00168092	0.0133015	0.240482955954502	-2.05599344717592	0.00144618	0.0120569	C6	20364994	20365760	-	525	-	-	-	-	-	106298746	A0A0D3CU36
Bo5g123710	0.38339248423843503	-1.3831060392016401	0.00170367	0.0134587	0.370763593906631	-1.43142850537092	0.0301189	0.127153	C5	38128623	38129705	-	861	-	GO:0003677;GO:0003677;GO:0003677;GO:0003700;GO:0003700;GO:0005634;GO:0005634;GO:0006351;GO:0006351;GO:0006355;GO:0006355;GO:0006355;	-	-	-	-	-
Bo5g109750	0.24106863402532799	-2.0524841439878698	0.00171435	0.0135258	2.97800074547355	1.57434411506537	0.00533238	0.0339515	C5	34041286	34042812	+	1182	-	GO:0004070;GO:0004070;GO:0005829;GO:0005829;GO:0006207;GO:0006207;GO:0006520;GO:0006520;GO:0009507;GO:0009570;GO:0009570;GO:0016036;GO:0016036;GO:0016597;GO:0016597;GO:0016740;GO:0016743;GO:0016743;	K00609	EC:2.1.3.2	-	106343728	A0A0D3CI23
Bo3g145200	0.3869486266844	-1.3697860555136701	0.00172095	0.0135693	0.315125134172825	-1.66600326753801	0.0412201	0.159667	C3	52285045	52287524	+	1095	-	GO:0016788;GO:0016788;	-	-	-	106336472	A0A0D3BIW1
Bo9g097020	0.40016425690067098	-1.3213357849527101	0.00172519	0.0135998	2.4858146015082	1.31371870046968	0.000272252	0.00304861	C9	31047927	31050236	+	867	-	-	-	-	-	-	-
Bo9g151550	0	-Inf	0.00174567	0.013738	Inf	Inf	0.0109744	0.0591757	C9	44997330	44998910	-	150	-	-	-	-	-	-	-
Bo1g011690	0.41990767907251703	-1.2518559231504001	0.00179095	0.0140497	0.342865283537095	-1.54428626178457	0.000162491	0.00197374	C1	4182133	4184323	-	1635	-	GO:0005516;GO:0005516;GO:0006950;GO:0006950;	-	-	-	106309871	A0A0D3A2Z4
Bo2g062690	9.5585875142687404E-2	-3.3870587448653202	0.00181164	0.0141881	3.91377019218695	1.96855904663263	0.00783602	0.0455073	C2	18362958	18364076	+	1041	-	GO:0016020;GO:0016021;GO:0016021;GO:0016021;GO:0055085;GO:0055085;	-	-	-	-	-
Bo2g004050	0.20118833470921599	-2.31338143758218	0.00181462	0.0142085	3.26618896983301	1.7076082624104	0.00757285	0.0443023	C2	665040	666984	+	1029	-	GO:0003677;GO:0003677;GO:0003700;GO:0003700;GO:0005634;GO:0005634;GO:0005667;GO:0005667;GO:0006351;GO:0006351;GO:0006355;GO:0006355;GO:0006355;GO:0007049;GO:0007049;	K04683	-	-	106324891	-
Bo00834s030	0.39106653702556199	-1.35451400277638	0.00183157	0.014302	2.07932878355463	1.05611789523376	0.00503464	0.0324115	Scaffold00834	35904	37936	+	1404	-	GO:0005783;GO:0006641;GO:0008654;GO:0016020;GO:0016021;GO:0016021;GO:0016746;GO:0019375;GO:0019432;GO:0045017;GO:0047184;GO:0071617;	K13519	-	-	106320164	A0A0D2ZRF3
Bo3g061860	0.33386606088779502	-1.5826586510146099	0.00186049	0.0144733	2.73224754343651	1.45008819867547	0.0288991	0.123551	C3	23712984	23714971	+	861	-	GO:0015031;GO:0015031;GO:0016020;GO:0016020;GO:0016192;	-	-	-	-	-
Bo1g120540	0.244591599659567	-2.0315532386001198	0.00186655	0.0145143	3.46657094301968	1.79350928543522	0.000866104	0.00794707	C1	36176049	36178288	+	1461	-	GO:0003735;GO:0003735;GO:0005622;GO:0005622;GO:0005840;GO:0005840;GO:0005840;GO:0006412;GO:0006412;GO:0030529;	-	-	-	-	-
Bo8g085930	0.30693127133696801	-1.7040124542819099	0.00187074	0.0145408	3.14347567073886	1.65236059726931	0.0119669	0.0632664	C8	29325390	29326693	+	972	-	GO:0003677;GO:0003677;GO:0003677;GO:0003700;GO:0003700;GO:0005634;GO:0005634;GO:0005634;GO:0006351;GO:0006351;GO:0006355;GO:0006355;GO:0006355;GO:0008270;GO:0008270;GO:0043565;GO:0043565;GO:0045893;GO:0045893;GO:0046872;	-	-	-	106312653	A0A0D3DT37
Bo7g057770	0.42781157386756602	-1.2249525816797	0.00189933	0.0147262	0.364107436745795	-1.4575638873466	8.58847e-07	2.08984e-05	C7	21056113	21057226	-	921	-	GO:0003677;GO:0003677;	-	-	-	-	-
Bo3g026480	0.330451342557399	-1.5974902377354701	0.00191017	0.0147886	2.95272466152534	1.56204683294596	0.000118553	0.00151378	C3	9710298	9712816	-	1962	-	GO:0003723;GO:0003723;GO:0009507;GO:0009507;GO:0042646;GO:0042646;GO:1901259;GO:1901259;	-	-	-	106334553	A0A0D3B4H0
Bo7g116140	0.43493607013114499	-1.2011247354957	0.00195431	0.0150896	0.479448866019807	-1.06055113714842	0.00534804	0.034028	C7	46340305	46342913	-	1854	-	GO:0000166;GO:0004672;GO:0004672;GO:0004674;GO:0004674;GO:0005102;GO:0005102;GO:0005515;GO:0005524;GO:0005524;GO:0005524;GO:0006468;GO:0006468;GO:0007165;GO:0007165;GO:0016020;GO:0016021;GO:0016021;GO:0016301;GO:0016310;GO:0016740;	K13416	-	-	106306477	-
Bo2g100740	0.458326871184073	-1.12555122312331	0.00196497	0.0151624	0.38511489193015	-1.37663918339001	0.000130621	0.00164044	C2	29102400	29105089	-	1665	-	GO:0005516;GO:0005516;GO:0006952;GO:0006952;GO:0006952;GO:0009607;GO:0009607;GO:0016020;GO:0016021;GO:0016021;GO:0016021;	-	-	-	-	-
Bo9g176600	0.28764638477794802	-1.79763175675526	0.00198032	0.0152619	3.57127574905724	1.83643953309466	8.92312e-05	0.00118594	C9	52574115	52575882	+	789	-	GO:0005829;GO:0005829;GO:0016491;GO:0016491;GO:0055114;	K08081	EC:1.1.1.206	-	106318354	A0A0D3EHG5
Bo6g076550	0.134608014596276	-2.8931637839430402	0.00198469	0.0152924	2.62604523881598	1.39289176971644	0.00835439	0.047754	C6	22421083	22422044	-	315	-	GO:0003735;GO:0003735;GO:0005622;GO:0005622;GO:0005840;GO:0005840;GO:0005840;GO:0006412;GO:0006412;GO:0030529;	-	-	-	-	-
Bo9g174040	0.29162451426291403	-1.7778160956648399	0.00198717	0.0153052	3.45422612304131	1.78836252870131	0.000642744	0.00622762	C9	51357210	51360564	-	1812	-	GO:0004040;GO:0004040;GO:0005515;GO:0005739;GO:0005739;GO:0006626;GO:0006626;	-	-	-	106313779	A0A0D3EGQ9
Bo2g136530	0.29896727141382801	-1.7419405367294201	0.00199214	0.0153339	3.86499294777915	1.9504657817534	1.35082e-05	0.000235528	C2	43380681	43382807	+	1734	-	GO:0005515;	-	-	-	106327867	A0A0D3AVK4
Bo4g145560	0.34292921098323298	-1.5440172954673199	0.00200043	0.0153873	5.95616671593223	2.57438413620384	2.88807e-05	0.000451185	C4	39676628	39678383	+	804	-	GO:0016020;GO:0016021;GO:0016021;	K12386	-	-	106339488	A0A0D3C0W2
Bo3g034340	0.30449309022473597	-1.71551860505334	0.00202559	0.0155496	2.52412419120227	1.33578289511596	0.00524683	0.0334981	C3	13005828	13006542	+	465	-	GO:0003735;GO:0003735;GO:0005622;GO:0005622;GO:0005840;GO:0005840;GO:0005840;GO:0006412;GO:0006412;GO:0030529;	-	-	-	-	-
Bo8g007150	0.34698193500152602	-1.52706754148482	0.00202654	0.0155518	3.35390097595165	1.74584009390749	5.55769e-05	0.000795779	C8	1385087	1387896	+	1248	-	GO:0016020;GO:0016021;GO:0016021;	K15280	-	-	106307391	A0A0D3DJ61
Bo8g107490	0.113576397305843	-3.1382650402185699	0.00202671	0.0155518	12.9621319091009	3.69623111571334	2.42775e-07	6.72575e-06	C8	38208304	38210275	-	1107	-	GO:0004177;GO:0004177;GO:0004177;GO:0006508;GO:0006508;GO:0006508;GO:0008233;GO:0008235;GO:0008235;GO:0016787;GO:0046872;GO:0046872;GO:0070006;GO:0070006;GO:0070084;GO:0070084;	K01265	EC:3.4.11.18	-	106309826	A0A0D3DXJ9
Bo4g039060	0.41312079034321197	-1.27536442910071	0.00206162	0.0157611	2.61741946911993	1.38814515003533	9.53112e-05	0.00125429	C4	8531701	8536522	+	2664	-	GO:0003824;GO:0003824;GO:0003937;GO:0003937;GO:0004643;GO:0004643;GO:0006164;GO:0006164;GO:0006807;GO:0006807;GO:0009409;GO:0009507;GO:0009536;GO:0009570;GO:0010319;GO:0016151;GO:0016151;	-	-	-	-	-
Bo3g012320	4.4224488957149297E-2	-4.4990107180460202	0.00206434	0.0157787	8.33263746336992	3.0587732126459	1.45526e-05	0.000250467	C3	4099685	4099999	+	315	-	GO:0016020;GO:0016021;GO:0016021;	-	-	-	106335809	A0A0D3B1K0
Bo00285s240	0.25903930975154699	-1.94875704840288	0.00207443	0.0158354	2.86874318061154	1.52041881905033	0.00523288	0.0334248	Scaffold00285	237554	238434	+	732	-	GO:0003676;GO:0003676;GO:0003723;GO:0003723;GO:0008270;GO:0008270;	K12885	-	-	106319554	A0A0D2ZPD6
Bo3g054930	0.20942304922379801	-2.2555078600165399	0.00209828	0.0159987	2.94787824302184	1.55967693765681	0.0157122	0.0778945	C3	21684588	21685973	-	807	-	GO:0005739;GO:0005739;GO:0006412;GO:0006412;	K02838	-	-	106331917	A0A0D3B977
Bo4g190620	2.3935767107191398E-2	-5.3846881466580703	0.00210465	0.016044	69.6068947752959	6.12115831138476	5.45476e-05	0.00078314	C4	51324012	51325247	-	810	-	GO:0016020;GO:0016021;GO:0016021;GO:0016740;GO:0016746;GO:0019706;GO:0019706;	-	-	-	-	-
Bo5g143420	0.40880677833953599	-1.2905089773893199	0.00211943	0.0161401	3.71657136641455	1.89397231122734	8.91633e-08	2.72221e-06	C5	44387473	44398249	-	6618	-	GO:0005488;	K14550	-	-	106294513	-
Bo3g009440	0.19516243109016801	-2.3572527351032999	0.00215681	0.0163846	0.468943236960472	-1.0925147920011	0.0329961	0.135803	C3	3212672	3214157	+	1191	-	GO:0003824;GO:0003824;GO:0008152;GO:0008152;GO:0009058;GO:0009058;GO:0016740;GO:0016746;GO:0016746;GO:0016746;GO:0016747;GO:0016747;	K00660	EC:2.3.1.74	-	106328481	A0A0D3B111
Bo3g158660	0.22692063160994499	-2.1397403101689099	0.00217154	0.0164595	3.39229144166181	1.76226012136873	0.0026758	0.019762	C3	56615875	56618062	-	1197	-	GO:0005794;GO:0005794;GO:0016020;GO:0016020;GO:0016020;GO:0016021;GO:0016021;GO:0016021;GO:0022857;GO:0022857;GO:0055085;	-	-	-	106328136	A0A0D3BKG5
Bo8g107900	0.36774930433792402	-1.44320548251447	0.00217516	0.0164769	2.04519547469108	1.0322387389568	0.0117813	0.0625261	C8	38430013	38430811	-	387	-	GO:0006811;GO:0015078;GO:0015078;GO:0015991;GO:0015991;GO:0015992;GO:0033180;GO:0033180;	-	-	-	-	-
Bo7g114400	0.161962961721345	-2.62626416480414	0.00219248	0.0165709	0.22403861191343	-2.15818070003531	0.0045063	0.0297703	C7	45414816	45415998	-	855	-	GO:0004553;GO:0004553;GO:0005576;GO:0005618;GO:0005618;GO:0005618;GO:0005975;GO:0005975;GO:0006073;GO:0006073;GO:0008152;GO:0010411;GO:0010411;GO:0016740;GO:0016762;GO:0016762;GO:0016762;GO:0016787;GO:0016798;GO:0042546;GO:0042546;GO:0048046;GO:0048046;GO:0048046;GO:0071555;GO:0071555;	K08235	EC:2.4.1.207	-	106306486	A0A0D3DGZ2
Bo9g088460	7.0318577532445095E-2	-3.8299503031336202	0.00219503	0.0165869	6.30816029083943	2.65721931958643	0.0393696	0.154455	C9	27385188	27385466	-	279	-	GO:0004672;GO:0004672;GO:0005524;GO:0005524;GO:0006468;GO:0006468;GO:0016020;GO:0016021;GO:0016021;	-	-	-	-	-
Bo7g061340	0.46116767959406202	-1.11663668797591	0.00237371	0.0177532	0.186884456121884	-2.41978151514853	0.0024398	0.0184006	C7	22507001	22508346	-	1062	-	GO:0006508;GO:0006508;GO:0006508;GO:0008233;GO:0008234;GO:0008234;GO:0008234;GO:0016787;	K16290	EC:3.4.22.-	-	106301892	A0A0D3D7R6
Bo3g021880	0.48671312490278001	-1.0388564154490001	0.00245085	0.0182458	3.04094908464723	1.60452166117572	3.33016e-07	8.90265e-06	C3	7427111	7428945	-	1056	-	GO:0005829;GO:0005829;GO:0006950;GO:0006950;GO:0009228;GO:0009228;GO:0009228;GO:0009507;GO:0009536;GO:0009570;GO:0009570;GO:0046872;GO:0046872;GO:0052837;GO:0052837;	K03146	EC:2.4.2.60	-	106335239	A0A0D3B3F9
Bo7g011290	0.122293605644929	-3.0315791231195499	0.00246813	0.0183488	11.6371858898148	3.54067032206372	0.000472745	0.00482287	C7	3637234	3637482	+	249	-	GO:0003677;GO:0003677;GO:0005634;GO:0005634;	-	-	-	106304395	A0A0D3D327
Bo6g121710	0.35167828517654798	-1.5076718382160901	0.00251989	0.0187036	0.481224350753514	-1.05521844775474	0.0151276	0.0757832	C6	38681522	38683431	+	993	-	GO:0003824;GO:0003824;GO:0004619;GO:0004619;GO:0006096;GO:0006096;GO:0008152;GO:0008152;GO:0016868;GO:0016868;	K01834	EC:5.4.2.11	-	106300189	A0A0D3D1H6
Bo9g183430	0.14413367463321999	-2.7945206563166902	0.00258391	0.0191141	6.74531007488408	2.75388476388747	0.000150236	0.00184891	C9	54199192	54200632	-	711	-	GO:0003676;GO:0003676;	-	-	-	106315814	A0A0D3EIA2
Bo9g008560	0.43761533362473198	-1.19226480521029	0.00260027	0.0192083	2.3384898847447	1.22557718832058	0.000360865	0.00382441	C9	2126153	2128235	+	1347	-	GO:0000166;GO:0004672;GO:0004672;GO:0004674;GO:0004674;GO:0005524;GO:0005524;GO:0005524;GO:0006468;GO:0006468;	-	-	-	106319502	A0A0D3E0K1
Bo2g028880	0.373982203678495	-1.4189584752441	0.00262178	0.0193404	31.2816759879913	4.96724590532	1.83871e-11	1.1577e-09	C2	8687995	8690111	+	1596	-	GO:0006629;GO:0006629;GO:0008081;GO:0008081;	-	-	-	-	-
Bo4g145790	1.6513529474196698E-2	-5.92020768607569	0.00270584	0.0198921	13.8983627537678	3.79684303638717	0.038607	0.152239	C4	39832968	39833676	+	282	-	-	-	-	-	106340561	A0A0D3C0Y5
Bo3g032820	0.33106895308510398	-1.5947963705623001	0.00272028	0.0199857	2.05766026800478	1.04100480432898	0.00367844	0.0253686	C3	12625224	12626882	+	1659	-	GO:0005516;GO:0005516;	-	-	-	106336340	A0A0D3B5Q6
Bo6g018630	0.23702431471333499	-2.0768930318944401	0.00275588	0.0202061	3.89833215502422	1.96285701978789	0.000467158	0.00477361	C6	4120022	4125696	+	3204	-	GO:0003824;GO:0003824;GO:0005739;GO:0005739;GO:0006508;GO:0006508;GO:0009507;GO:0009507;GO:0016485;GO:0016485;GO:0046872;GO:0046872;	K06972	EC:3.4.24.-	-	106296221	A0A0D3CPK6
Bo8g106170	5.7964047503708101E-2	-4.1086978510971104	0.00276666	0.0202765	2.33389585394367	1.22274018471652	0.00442904	0.0293647	C8	37485456	37486441	+	195	-	-	-	-	-	106310150	A0A0D3DX67
Bo7g081360	0.489152332418058	-1.0316442738813301	0.00277335	0.0203175	0.467917475320941	-1.09567398482973	0.000708081	0.0067265	C7	31451315	31452340	+	798	-	GO:0003993;GO:0003993;GO:0016311;	-	-	-	106301923	A0A0D3DAM8
Bo5g043710	0.39587008272138602	-1.3369010528802701	0.00280698	0.020535	3.5035686225857	1.80882515382949	1.02828e-06	2.44485e-05	C5	14868851	14869607	-	447	-	-	-	-	-	-	-
Bo4g038580	4.3968852986651298E-2	-4.5073742922492697	0.00287124	0.0209194	11.4311439282732	3.51489787788581	0.0193466	0.0914861	C4	8235086	8235918	+	714	-	-	-	-	-	-	-
Bo5g127510	0.45022493698582999	-1.15128212812318	0.00291041	0.0211633	4.2411350327781	2.08445041738802	5.77541e-10	2.70677e-08	C5	39592846	39594656	-	1293	-	GO:0016554;	-	-	-	-	-
Bo1g011520	0.29726418266301802	-1.7501824513773701	0.00291479	0.021191	3.28825163446193	1.71732070592332	0.000304233	0.00332856	C1	4101646	4108146	-	3633	-	GO:0003677;GO:0003677;GO:0003916;GO:0003916;GO:0003917;GO:0003917;GO:0005694;GO:0005694;GO:0006265;GO:0006265;	-	-	-	-	-
Bo5g137710	0.13752595350754299	-2.8622241892439901	0.00291832	0.0212126	2.2598561504377	1.1762309418196	0.00981418	0.0542012	C5	42969355	42970011	-	657	-	GO:0005509;GO:0005509;GO:0005886;GO:0005886;GO:0050832;GO:0050832;	K13448	-	-	106292802	A0A0D3CLI5
Bo8g115260	0.30637246549186797	-1.7066414506379699	0.00294393	0.0213736	2.37164791598353	1.24588984986426	0.00387152	0.0264079	C8	40673771	40674278	+	195	-	-	-	-	-	-	-
Bo3g099160	0.44684627986992398	-1.16214948140019	0.00297752	0.021588	2.75879807220898	1.46403986376479	1.57208e-05	0.0002675	C3	35368748	35369332	-	441	-	-	-	-	-	106335480	A0A0D3BES5
Bo9g067010	0.15998541359587101	-2.6439877191008798	0.00299013	0.0216583	10.6124243583234	3.40768236567292	3.04915e-05	0.000473866	C9	20218965	20219635	-	528	-	GO:0006355;GO:0006355;GO:0008270;GO:0008270;	-	-	-	106315895	A0A0D3E732
Bo6g119530	0.37286921128752099	-1.42325841967615	0.00300364	0.0217477	2.12426292167998	1.0869623406848	0.00861587	0.0489647	C6	37443825	37444326	+	432	-	GO:0003735;GO:0003735;GO:0005622;GO:0005622;GO:0005840;GO:0005840;GO:0005840;GO:0006412;GO:0006412;GO:0030529;	K02909	-	-	106298491	A0A0D3D0V8
Bo4g137570	0.20765103353822301	-2.2677670424034502	0.00302147	0.0218641	0.295525610070433	-1.75864493598831	0.00125243	0.0107508	C4	36446525	36447614	-	1002	-	-	-	-	-	106337057	A0A0D3BZQ9
Bo3g074670	0.32371205452884799	-1.62721700464093	0.00304538	0.0220072	2.99558720138287	1.58283883088963	0.000467278	0.00477361	C3	28581516	28585090	-	1638	-	GO:0000166;GO:0005524;GO:0005524;GO:0005524;GO:0005737;GO:0005737;GO:0006457;GO:0006457;GO:0051082;GO:0051082;	K09493	-	-	106328730	A0A0D3BCB0
Bo7g091210	0.265852966020592	-1.91129953277607	0.0030552	0.022061	0.2875583652923	-1.79807328744992	0.0271252	0.117703	C7	35085859	35086515	+	570	-	GO:0008270;GO:0008270;GO:0009737;GO:0009737;GO:0010200;GO:0010200;GO:0046872;	-	-	-	106304288	A0A0D3DC18
Bo8g099710	0.46518215385424999	-1.1041323442495601	0.00310085	0.022304	0.244816865822392	-2.03022514388228	1.31608e-06	3.04023e-05	C8	34431514	34432620	-	1107	-	GO:0005515;GO:0009585;GO:0009585;GO:0010017;	-	-	-	106312250	A0A0D3DVM0
Bo2g046180	0.27437440434991101	-1.86578219223886	0.00311479	0.022374	3.04568207596256	1.60676535371936	0.00191294	0.015132	C2	12696467	12697825	-	705	-	GO:0003735;GO:0003735;GO:0005622;GO:0005622;GO:0005840;GO:0005840;GO:0006412;GO:0006412;	-	-	-	-	-
Bo8g102610	0.27284709693717801	-1.8738354012102201	0.00312191	0.0224166	2.20210908593457	1.13888593749391	0.0049158	0.0318301	C8	36171639	36172333	-	432	-	GO:0003735;GO:0003735;GO:0005622;GO:0005622;GO:0005840;GO:0005840;GO:0006412;GO:0006412;	K02903	-	-	106309734	A0A0D3DWG0
Bo2g051070	0.281082033965596	-1.8309368515464699	0.00313324	0.0224762	4.39869759855672	2.1370764223304	1.98641e-05	0.000326845	C2	14568755	14571967	+	1620	-	GO:0005515;GO:0015031;GO:0016020;GO:0016021;GO:0016021;GO:0016021;GO:0032977;GO:0032977;GO:0051205;	-	-	-	106322822	A0A0D3AN49
Bo7g082410	0.29840537405466	-1.74465457721582	0.00313805	0.0224977	2.16786470604664	1.11627472255609	0.0305928	0.128451	C7	32478312	32480707	-	1674	-	GO:0004553;GO:0004553;GO:0005975;GO:0005975;GO:0008152;GO:0016787;GO:0016798;	-	-	-	106301606	A0A0D3DAY3
Bo8g102210	0.24222590074779199	-2.0455749570122701	0.00320678	0.0228991	4.46519766434358	2.15872404165249	6.36099e-05	0.000893692	C8	35980875	35981117	+	243	-	GO:0016020;GO:0016021;GO:0016021;	-	-	-	-	-
Bo1g010010	9.5960788837465796E-2	-3.3814111725433098	0.0032521	0.0231858	0.151768359539183	-2.72005704388266	0.00144781	0.0120678	C1	3311591	3313479	-	846	-	GO:0005759;GO:0005759;GO:0009976;GO:0009976;	-	-	-	-	-
Bo4g098290	4.4866482197877103E-2	-4.4782181172967297	0.00329776	0.0234664	45.739374012091	5.51536471608443	6.67815e-09	2.5643e-07	C4	24481893	24483680	-	1197	-	GO:0003677;GO:0003677;GO:0005634;GO:0005634;GO:0008270;GO:0008270;	-	-	-	-	-
Bo9g003920	0.491929941326333	-1.0234752274894201	0.00330311	0.0235	4.33885214867886	2.11731342551809	9.69214e-06	0.000176306	C9	526962	527363	+	402	-	GO:0009733;GO:0009733;	K14488	-	-	106315641	A0A0D3DZT5
Bo3g167190	0.41265607837399898	-1.2769882036325499	0.0033221	0.0236168	0.0854677848215681	-3.54847545908893	0.0021849	0.0168798	C3	59006359	59007675	+	1140	-	GO:0003682;GO:0003682;GO:0010468;GO:0010468;	-	-	-	106331584	-
Bo3g141780	0.27360309003733202	-1.8698435709634	0.00339498	0.0240799	3.35781727742391	1.74752372517465	0.000730201	0.00690331	C3	51213206	51217094	+	1329	-	GO:0046983;GO:0046983;	-	-	-	106329126	A0A0D3BIG7
Bo1g008100	0.40077868492374302	-1.3191223128326199	0.00345924	0.0244844	4.65327204950201	2.21824553547128	1.41185e-08	5.087e-07	C1	2820411	2822265	+	1293	-	GO:0004190;GO:0004190;GO:0004190;GO:0006508;GO:0006508;GO:0006508;GO:0008233;GO:0016787;	-	-	-	106311687	A0A0D3A284
Bo8g104280	0.20142096397592199	-2.3117142474408299	0.00347535	0.0245844	5.9924830962187	2.58315393428144	1.35651e-05	0.000236189	C8	36543050	36545963	-	2538	-	GO:0051513;GO:0051513;	-	-	-	106312387	A0A0D3DWM8
Bo7g085650	0.417990828889786	-1.2584568063141599	0.00348743	0.0246605	0.286582017614456	-1.80298000835906	5.44771e-05	0.00078314	C7	33304779	33307212	+	1566	-	GO:0004497;GO:0004497;GO:0005506;GO:0005506;GO:0016020;GO:0016021;GO:0016021;GO:0016491;GO:0016705;GO:0016705;GO:0020037;GO:0020037;GO:0046872;GO:0055114;GO:0055114;GO:0055114;	K20660	-	-	106305600	A0A0D3DBA9
Bo7g100670	0.29036047319001002	-1.7840830224558999	0.00349678	0.0247031	2.75183167258189	1.46039222419752	0.00439281	0.0291658	C7	39201071	39202059	-	546	-	-	-	-	-	106302177	A0A0D3DDW7
Bo2g014130	7.6527672623137397E-3	-7.0298027599007797	0.00354182	0.0249469	161.659386281129	7.33681346555363	1.04587e-05	0.00018869	C2	4614427	4614720	-	294	-	GO:0009733;GO:0009733;	K14488	-	-	106324806	A0A0D3AJN0
Bo5g141350	0.41331622014167502	-1.27468211307962	0.00370583	0.025856	2.6954376544428	1.43051954037354	0.00012414	0.00157065	C5	43798356	43799146	-	462	-	GO:0000387;GO:0000387;GO:0006396;GO:0006396;	-	-	-	-	-
Bo3g153970	0.36369193865513499	-1.4592111465234501	0.00376069	0.0261701	2.26875915915323	1.18190346738972	0.00550439	0.0348273	C3	55187506	55188732	+	1227	-	GO:0003729;GO:0003729;GO:0005515;GO:0005739;GO:0005739;	-	-	-	106328504	A0A0D3BJZ3
Bo6g124430	0.198342936502789	-2.3339310745347501	0.00377297	0.0262506	4.33064491484398	2.11458188549831	0.00125527	0.0107588	C6	39611792	39613863	-	1221	-	GO:0000287;GO:0000287;GO:0003862;GO:0003862;GO:0003862;GO:0005737;GO:0005737;GO:0009082;GO:0009098;GO:0009098;GO:0009098;GO:0016616;GO:0016616;GO:0046872;GO:0051287;GO:0051287;GO:0055114;GO:0055114;	K00052	EC:1.1.1.85	-	106299777	A0A0D3D1Z9
Bo27362s010	0.39598681868577001	-1.336475687141	0.00382641	0.026558	2.45746192351196	1.29716906328568	0.000839526	0.0077431	Scaffold27362	27	182	+	156	-	-	-	-	-	-	-
Bo3g057470	0.27203973384045899	-1.87811070948508	0.00384924	0.0266965	2.52352825238835	1.33544223854932	0.0194954	0.0919687	C3	22457006	22458323	+	783	-	GO:0000166;GO:0000166;GO:0000166;GO:0004812;GO:0004812;GO:0004812;GO:0004830;GO:0004830;GO:0005524;GO:0005524;GO:0005524;GO:0005737;GO:0005737;GO:0006412;GO:0006418;GO:0006418;GO:0006436;GO:0006436;GO:0016874;	-	-	-	-	-
Bo6g119900	0.248482696414944	-2.00878270453051	0.00390884	0.0270645	2.24246859879285	1.1650877832792	0.00500591	0.0322628	C6	37685302	37688337	-	2964	-	GO:0000325;GO:0000325;GO:0004672;GO:0004672;GO:0004674;GO:0005515;GO:0005524;GO:0005524;GO:0005886;GO:0005886;GO:0006468;GO:0006468;GO:0009506;GO:0009506;GO:0009934;GO:0009934;GO:0010080;GO:0010080;GO:0016020;GO:0016021;GO:0016021;GO:0033612;GO:0033612;GO:0036289;GO:0043621;GO:0043621;GO:0048833;GO:0048833;	K00924	EC:2.7.1.-	-	106300159	A0A0D3D0Z5
Bo6g069850	2.6408992060577698E-2	-5.2428269498734901	0.00394133	0.0272336	48.2621643974404	5.59282071196267	0.00078908	0.00735583	C6	20189768	20190341	+	492	-	GO:0016020;GO:0016021;GO:0016021;	-	-	-	-	-
Bo4g190350	0.121057825800984	-3.0462317493023998	0.00394947	0.0272747	4.12405974150913	2.04406523187059	0.0433655	0.165666	C4	51189534	51191846	-	1050	-	-	K12849	-	-	106337587	A0A0D3C5H0
Bo7g049880	0.32396240567921403	-1.6261016900707499	0.00396578	0.0273721	3.17870604490349	1.66843960748929	0.000416953	0.00433467	C7	18261274	18261828	+	555	-	GO:0003676;GO:0003676;GO:0003677;GO:0003677;GO:0006355;GO:0006355;GO:0008270;GO:0008270;	-	-	-	106302063	A0A0D3D6G3
Bo3g119580	0.35788320943977803	-1.48243923547562	0.00397532	0.0274329	0.323994845482816	-1.62595723380071	0.00352965	0.0245806	C3	42319435	42320709	-	1275	-	GO:0004664;GO:0004664;GO:0008652;GO:0009073;GO:0009094;GO:0009094;GO:0009094;GO:0009507;GO:0009507;GO:0009536;GO:0009570;GO:0009570;GO:0016829;GO:0047769;GO:0047769;GO:0047769;GO:0080167;GO:0080167;	K05359	-	-	106329170	A0A0D3BGN1
Bo4g190670	0.26306574215952999	-1.9265047096846699	0.00400113	0.0275905	0.377865196395769	-1.40405645085821	0.00116145	0.010109	C4	51345656	51347489	+	1191	-	GO:0008152;GO:0008152;GO:0008168;GO:0008168;GO:0009507;GO:0010287;GO:0010287;GO:0032259;GO:0080167;GO:0080167;	-	-	-	-	-
Bo5g132410	0.49280893537345399	-1.0208996803681401	0.00401773	0.0276999	2.71835359301651	1.4427331285528	4.07353e-05	0.000612339	C5	41055172	41055357	-	186	-	GO:0016020;GO:0016021;GO:0016021;	-	-	-	106292827	A0A0D3CKK3
[truncated: 347 more rows]
