# Supplementary material for: Transcriptome Analysis Reveals Key Genes and Pathways Associated with the Petal Color Formation in Cabbage (Brassica oleracea L. var. capitata)
Source: Int J Mol Sci. 2022 Jun 15;23(12):6656. doi: 10.3390/ijms23126656 (PMC9224331; doi:10.3390/ijms23126656)
Supplement: Supplementary file 1 [file ijms-23-06656-s001.zip › Table S3.xlsx]

## Sheet: A192-1 vs YL-1
Homologous gene in B. oleracea	Gene ID	log2(FoldChange)	q-value
Bo2g013500	PSY1	-0.92692	0.266005
Bo3g012430	PSY2	-1.02135	0.363514
Bo9g161470	PSY3	0.588784	0.292477
Bo3g149200	PDS1	4.91024	1.02722e-18
Bo3g149210	PDS2	4.64449	3.36734e-31
Bo4g127210	PDS3	0.266394	0.861739
Bo5g013300	Z-ISO	0.070392	1
Bo5g146930	ZDS	0.366006	0.623747
Bo8g114430	CRTISO	-0.426627	0.767943
Bo9g053390	CRTISO2	-0.00637829	1
Bo5g137670	LYC	-0.831925	0.236578
Bo3g019500	LUT2.1	-0.0257773	1
Bo9g130620	LUT2.2	2.47917	4.70596e-10
Bo1g040420	CHY1.1	-1.06926	0.0101935
Bo7g110490	CHY1.2	-0.408476	0.75601
Bo2g047610	CHY2.1	2.37207	1.65918e-05
Bo9g108310	CHY2.2	0.116325	1
Bo5g068170	LUT5	0.131956	1
Bo8g039560	CYP97B3	-0.299883	0.729409
Bo6g067160	LUT1	0.37567	0.664746
Bo7g064130	ZEP.1	1.17041	0.00245485
Bo9g020440	ZEP.2	0.745974	0.346434
Bo5g009080	VDE	0.731056	0.376586
Bo2g055390	NSY	-1.28082	0.016867
Bo1g009920	CCD8	0.154328	1
Bo1g019460	NCED2.1	1.17707	0.621741
Bo7g105930	NCED2.2	1.10773	0.512871
Bo3g066190	NCED3.1	-0.185853	0.930239
Bo5g130280	NCED3.2	0.652417	0.360446
Bo1g020270	NCED4.1	2.50171	1.10562e-08
Bo3g158650	NCED4.2	-13.4532	1.40684e-09
Bo5g062360	NCED5	-0.929953	1
Bo7g038710	NCED6	0.980061	1
Bo6g122000	NCED9	-1.05297	0.578882
Bo6g028000	ABA2	-0.133645	0.999978
Bo4g161370	AAO3	-1.26647	0.0494958

## Sheet: YL-1 VS YF-2
Homologous gene in B. oleracea	Gene ID	log2(FoldChange)	q-value
Bo2g013500	PSY1	-1.37993	0.0366451
Bo3g012430	PSY2	-0.55703	0.308182
Bo9g161470	PSY3	-1.87851	1.68152e-08
Bo3g149200	PDS1	-0.70566	0.477087
Bo3g149210	PDS2	0.445464	0.344291
Bo4g127210	PDS3	-1.38487	0.000124307
Bo5g013300	Z-ISO	-0.222288	0.783299
Bo5g146930	ZDS	-1.3052	0.000261723
Bo8g114430	CRTISO	1.25964	0.00754589
Bo9g053390	CRTISO2	-1.39673	0.000111768
Bo5g137670	LYC	-0.758175	0.0732275
Bo3g019500	LUT2.1	-1.90391	0.00105169
Bo9g130620	LUT2.2	-1.39863	6.51941e-05
Bo1g040420	CHY1.1	-2.03578	3.06195e-09
Bo7g110490	CHY1.2	-0.241847	0.826499
Bo2g047610	CHY2.1	-0.824915	0.158824
Bo9g108310	CHY2.2	-1.18985	0.00363215
Bo5g068170	LUT5	0.461393	0.694559
Bo8g039560	CYP97B3	-0.737205	0.0702742
Bo6g067160	LUT1	0.173657	0.86529
Bo7g064130	ZEP.1	-1.76077	2.07815e-08
Bo9g020440	ZEP.2	-1.67395	0.000343399
Bo5g009080	VDE	0.671521	0.172511
Bo2g055390	NSY	0.0545797	1
Bo1g009920	CCD8	-1.88002	0.181609
Bo1g019460	NCED2.1	-4.56511	2.7217e-09
Bo7g105930	NCED2.2	-1.33059	0.363086
Bo3g066190	NCED3.1	-2.26902	1.45907e-08
Bo5g130280	NCED3.2	-1.64906	0.000169549
Bo1g020270	NCED4.1	-0.315932	0.629463
Bo3g158650	NCED4.2	13.5778	6.09572e-46
Bo5g062360	NCED5	3.40566	0.415677
Bo7g038710	NCED6	-1.05367	0.869178
Bo6g122000	NCED9	-1.86428	0.474032
Bo6g028000	ABA2	0.457805	0.3783
Bo4g161370	AAO3	1.1289	0.0107588
