# Supplementary material for: Transcriptome Analysis Reveals Key Genes and Pathways Associated with the Petal Color Formation in Cabbage (Brassica oleracea L. var. capitata)
Source: Int J Mol Sci. 2022 Jun 15;23(12):6656. doi: 10.3390/ijms23126656 (PMC9224331; doi:10.3390/ijms23126656)
Supplement: Supplementary file 1 [file ijms-23-06656-s001.zip › Table S4.xlsx]

## Sheet: A192-1 vs YL-1
Gene ID	Family	baseMean	baseMeanA	baseMeanB	foldChange	log2FoldChange	pval	padj	Chromosome	Start Site	End Site	Direction	Length	Name	GO	KEGG	EC	Description	NCBI_GI	UniProtID	Family
Bo5g055990	NAC	165.423	327.167	3.68009	0.0112484	-6.47414	9.69216e-27	1.37673e-24	C5	18174658	18176154	+	936	-	GO:0003677;GO:0003677;GO:0003677;GO:0005634;GO:0005634;GO:0006351;GO:0006351;GO:0006355;GO:0006355;GO:0006355;	-	-	-	106344062	A0A0D3CEA7	NAC
Bo6g122640	MYB	21.7725	43.0555	0.489618	0.0113718	-6.4584	0.0276624	0.129707	C6	39223855	39224827	+	813	-	GO:0003677;GO:0003677;	K09422	-	-	106298924	A0A0D3D1R9	MYB
Bo7g100590	ZF-HD	12.8109	25.1321	0.489618	0.0194818	-5.68173	0.0127332	0.0702148	C7	39169333	39170070	+	738	-	GO:0003677;GO:0003677;GO:0003677;GO:0005634;GO:0005634;	-	-	-	106304202	A0A0D3DDV9	ZF-HD
Bo7g117300	Nin-like	24.7107	48.2736	1.14775	0.0237759	-5.39436	1.11354e-06	1.90888e-05	C7	46918283	46921246	-	2712	-	GO:0003677;GO:0003677;GO:0005515;GO:0005634;GO:0005634;GO:0006351;GO:0006351;GO:0006355;GO:0006355;	-	-	-	106306983	A0A0D3DHT2	Nin-like
Bo3g024180	SBP	10.2081	19.9266	0.489618	0.0245711	-5.34689	0.00511487	0.0337988	C3	8949074	8950413	+	1026	-	GO:0003677;GO:0003677;GO:0005634;GO:0005634;GO:0046872;GO:0046872;	-	-	-	106331858	A0A0D3B439	SBP
Bo9g174490	TCP	19.5375	38.0958	0.979236	0.0257045	-5.28183	2.35579e-05	0.00030655	C9	51590418	51591128	-	711	-	GO:0003677;GO:0003677;GO:0005634;GO:0005634;GO:0006351;GO:0006351;GO:0006355;GO:0006355;	K16221	-	-	106313519	A0A0D3EGV4	TCP
Bo8g106100	ERF	25.119	48.7691	1.46885	0.0301185	-5.05321	3.02232e-06	4.724e-05	C8	37466214	37467024	-	573	-	GO:0003677;GO:0003677;GO:0003677;GO:0003700;GO:0003700;GO:0005634;GO:0005634;GO:0006351;GO:0006351;GO:0006355;GO:0006355;GO:0006355;	-	-	-	106310758	A0A0D3DX60	ERF
Bo2g082590	ZF-HD	9.59228	18.6107	0.573874	0.0308357	-5.01925	0.00748803	0.0458648	C2	23229715	23230596	+	786	-	GO:0003677;GO:0003677;	-	-	-	106322515	-	ZF-HD
Bo9g003750	MYB_related	1585.8	3066.88	104.728	0.034148	-4.87205	0.0050353	0.03335	C9	424849	425309	-	240	-	GO:0003677;GO:0003677;	K09422	-	-	106316931	A0A0D3DZR8	MYB_related
Bo5g020460	bHLH	30.4681	58.8093	2.12698	0.0361675	-4.78916	0.0317819	0.144631	C5	7047085	7049061	+	1074	-	GO:0046983;GO:0046983;	-	-	-	106343757	A0A0D3CAD2	bHLH
Bo7g033260	MYB	8.16177	15.7497	0.573874	0.0364372	-4.77844	0.0256745	0.122218	C7	13104779	13105736	+	807	-	GO:0003677;GO:0003677;	K09422	-	-	106304419	A0A0D3D539	MYB
Bo1g008560	TALE	100.217	193.157	7.27593	0.0376684	-4.7305	0.0123539	0.0686007	C1	3040838	3042483	+	1386	-	GO:0003677;GO:0003677;GO:0003677;GO:0005634;GO:0005634;GO:0006355;GO:0006355;	-	-	-	106323393	A0A0D3A2D0	TALE
Bo5g043100	NAC	66.788	128.58	4.99635	0.0388581	-4.68564	5.44611e-12	2.02687e-10	C5	14252478	14254709	+	1374	-	GO:0003677;GO:0003677;GO:0003677;GO:0005634;GO:0005634;GO:0006351;GO:0006351;GO:0006355;GO:0006355;GO:0006355;	-	-	-	106343434	A0A0D3CD59	NAC
Bo2g151880	WRKY	7.49342	14.413	0.573874	0.0398165	-4.65049	0.0153939	0.0820773	C2	47967978	47969134	+	1014	-	GO:0003677;GO:0003700;GO:0003700;GO:0005634;GO:0005634;GO:0006351;GO:0006351;GO:0006355;GO:0006355;GO:0006355;GO:0043565;GO:0043565;	-	-	-	106324786	A0A0D3AX49	WRKY
Bo7g057680	ERF	9.54508	18.1109	0.979236	0.0540688	-4.20906	0.0101955	0.0588275	C7	20951189	20951644	+	456	-	GO:0003677;GO:0003677;GO:0003677;GO:0003700;GO:0003700;GO:0005634;GO:0005634;GO:0006351;GO:0006351;GO:0006355;GO:0006355;GO:0006355;	-	-	-	106305124	A0A0D3D798	ERF
Bo8g010900	GATA	8.85379	16.7284	0.979236	0.0585375	-4.0945	0.0154988	0.0824945	C8	1860357	1861646	-	864	-	GO:0003700;GO:0003700;GO:0006355;GO:0006355;GO:0008270;GO:0008270;GO:0043565;GO:0043565;GO:0046872;	-	-	-	106312062	A0A0D3DJD9	GATA
Bo6g092570	bHLH	51.1359	96.3804	5.89133	0.0611259	-4.03207	0.007651	0.0466786	C6	28422228	28424396	-	975	-	GO:0046983;GO:0046983;	-	-	-	106297040	-	bHLH
Bo1g017580	ERF	120.968	227.384	14.5519	0.0639969	-3.96585	1.06897e-13	4.828e-12	C1	6094553	6095353	-	801	-	GO:0003677;GO:0003677;GO:0003677;GO:0003700;GO:0003700;GO:0005634;GO:0005634;GO:0006351;GO:0006351;GO:0006355;GO:0006355;GO:0006355;	K09286	-	-	106310477	A0A0D3A3T6	ERF
Bo9g163740	bZIP	26.493	49.6269	3.35899	0.0676847	-3.88503	2.49662e-05	0.000322956	C9	48288217	48288768	-	552	-	GO:0003700;GO:0003700;GO:0006355;GO:0006355;	-	-	-	106317068	A0A0D3EF74	bZIP
Bo3g140010	C2H2	7.96726	14.871	1.06349	0.0715143	-3.80562	0.0267017	0.126012	C3	50638023	50638658	+	636	-	GO:0003676;GO:0003676;	-	-	-	106331468	A0A0D3BI89	C2H2

## Sheet: YL-1 vs YF-2
Gene ID	Family	baseMean	baseMeanA	baseMeanB	foldChange	log2FoldChange	pval	padj	Chromosome	Start Site	End Site	Direction	Length	Name	GO	KEGG	EC	Description	NCBI_GI	UniProtID	Family
Bo6g072840	MIKC_MADS	117.341	0.516683	195.224	377.842	8.56164	6.90687e-09	2.63858e-07	C6	21036213	21037965	+	777	-	GO:0000977;GO:0000977;GO:0003677;GO:0003677;GO:0003677;GO:0003700;GO:0003700;GO:0005634;GO:0005634;GO:0005634;GO:0006351;GO:0006351;GO:0006355;GO:0006355;GO:0006355;GO:0045944;GO:0045944;GO:0046983;GO:0046983;	-	-	-	106299005	A0A0D3CUB5	MIKC_MADS
Bo2g012920	Nin-like	1007.86	4.89496	1676.51	342.496	8.41995	3.0931e-22	1.92804e-19	C2	3876985	3878651	-	1215	-	GO:0003677;GO:0003677;GO:0005634;GO:0005634;GO:0006351;GO:0006351;GO:0006355;GO:0006355;	-	-	-	106325983	A0A0D3AJA9	Nin-like
Bo5g148390	M-type_MADS	30.1994	0.516683	49.9879	96.7478	6.59616	3.85565e-10	1.86548e-08	C5	45756344	45756925	-	582	-	GO:0003677;GO:0003677;GO:0003677;GO:0005634;GO:0005634;GO:0006351;GO:0006351;GO:0006355;GO:0006355;GO:0046983;GO:0046983;	-	-	-	106343937	A0A0D3CMV9	M-type_MADS
Bo9g163480	Nin-like	217.21	4.32384	359.134	83.0591	6.37607	9.96172e-11	5.46288e-09	C9	48092041	48093888	+	1284	-	GO:0003677;GO:0003677;GO:0005634;GO:0005634;GO:0006351;GO:0006351;GO:0006355;GO:0006355;	-	-	-	106317171	A0A0D3EF48	Nin-like
Bo4g046000	MYB	224.044	5.22127	369.925	70.8497	6.14669	3.5287e-18	9.35982e-16	C4	10822063	10824029	-	1446	-	GO:0003677;GO:0003677;	K09422	-	-	106340310	A0A0D3BST4	MYB
Bo1g070860	G2-like	59.3673	1.64524	97.8487	59.4739	5.89419	1.40953e-15	2.19652e-13	C1	20697966	20698883	+	918	-	GO:0003677;GO:0003677;GO:0003677;GO:0005634;GO:0005634;GO:0006351;GO:0006351;GO:0006355;GO:0006355;	-	-	-	106310400	A0A0D3A8V0	G2-like
Bo7g089140	CO-like	84.7142	3.71197	138.716	37.3698	5.2238	1.40495e-07	4.10799e-06	C7	34448942	34450387	-	1080	-	GO:0005515;GO:0005622;GO:0005622;GO:0005634;GO:0005634;GO:0008270;GO:0008270;	-	-	-	106306788	A0A0D3DBR0	CO-like
Bo5g137370	C2H2	10.6261	0.516683	17.3657	33.61	5.07082	0.000545961	0.00545524	C5	42791724	42792878	-	1155	-	GO:0003676;GO:0003676;	-	-	-	106293867	A0A0D3CLF1	C2H2
Bo2g151880	WRKY	11.814	0.611871	19.2822	31.5135	4.9779	0.000239156	0.00273948	C2	47967978	47969134	+	1014	-	GO:0003677;GO:0003700;GO:0003700;GO:0005634;GO:0005634;GO:0006351;GO:0006351;GO:0006355;GO:0006355;GO:0006355;GO:0043565;GO:0043565;	-	-	-	106324786	A0A0D3AX49	WRKY
Bo3g024180	SBP	9.00694	0.516683	14.6671	28.387	4.82716	0.00197431	0.0155174	C3	8949074	8950413	+	1026	-	GO:0003677;GO:0003677;GO:0005634;GO:0005634;GO:0046872;GO:0046872;	-	-	-	106331858	A0A0D3B439	SBP
Bo6g074510	bZIP	78.9306	5.22127	128.07	24.5285	4.61639	4.44416e-11	2.60112e-09	C6	21631252	21633051	-	945	-	GO:0003677;GO:0003700;GO:0003700;GO:0006355;GO:0006355;	-	-	-	106296658	A0A0D3CUI3	bZIP
Bo3g003800	B3	7.68678	0.516683	12.4668	24.1286	4.59267	0.00686579	0.0411178	C3	1347081	1351401	-	837	-	GO:0003677;GO:0003677;GO:0003677;GO:0005634;GO:0005634;GO:0006351;GO:0006351;GO:0006355;GO:0006355;	-	-	-	106334498	-	B3
Bo3g132770	G2-like	68.2954	5.0309	110.472	21.9586	4.45672	4.88945e-11	2.82636e-09	C3	48429112	48430074	+	963	-	GO:0003677;GO:0003677;GO:0003677;GO:0005634;GO:0005634;GO:0006351;GO:0006351;GO:0006355;GO:0006355;	-	-	-	106335466	A0A0D3BHL0	G2-like
Bo4g190040	ERF	22.4614	1.74042	36.2754	20.8429	4.38148	0.00127006	0.0108511	C4	51006498	51008137	-	816	-	GO:0003677;GO:0003677;GO:0003677;GO:0003700;GO:0003700;GO:0005634;GO:0005634;GO:0006351;GO:0006351;GO:0006355;GO:0006355;GO:0006355;	-	-	-	106339870	A0A0D3C5D9	ERF
Bo2g149810	CO-like	62.2714	5.45239	100.151	18.3682	4.19914	4.01206e-12	2.90796e-10	C2	47137562	47139047	-	1044	-	GO:0005515;GO:0005622;GO:0005622;GO:0005634;GO:0005634;GO:0008270;GO:0008270;	-	-	-	106322850	A0A0D3AWU1	CO-like
Bo7g060150	MIKC_MADS	81.1205	7.23357	130.378	18.0241	4.17185	3.26142e-08	1.0979e-06	C7	22379167	22381152	-	1008	-	GO:0000977;GO:0000977;GO:0003677;GO:0003677;GO:0003677;GO:0005634;GO:0005634;GO:0006351;GO:0006351;GO:0006355;GO:0045944;GO:0045944;GO:0046983;GO:0046983;	-	-	-	106304588	A0A0D3D7P6	MIKC_MADS
Bo5g008270	MYB_related	5.54796	0.516683	8.90215	17.2294	4.1068	0.0308571	0.129234	C5	2762698	2765204	-	1806	-	GO:0003677;GO:0003677;	-	-	-	106293586	A0A0D3C8A9	MYB_related
Bo2g008700	ERF	36.2872	4.18791	57.6866	13.7746	3.78394	0.0131234	0.0679613	C2	1627992	1628561	+	570	-	GO:0003677;GO:0003677;GO:0003677;GO:0003700;GO:0003700;GO:0005634;GO:0005634;GO:0006351;GO:0006351;GO:0006355;GO:0006355;GO:0006355;	-	-	-	106325447	A0A0D3AI37	ERF
Bo7g011290	MYB_related	35.0316	4.74534	55.2224	11.6372	3.54067	0.000472745	0.00482287	C7	3637234	3637482	+	249	-	GO:0003677;GO:0003677;GO:0005634;GO:0005634;	-	-	-	106304395	A0A0D3D327	MYB_related
Bo2g056350	HSF	685.039	93.4796	1079.41	11.547	3.52945	1.59362e-08	5.69803e-07	C2	16701527	16702862	-	1086	-	GO:0003677;GO:0003700;GO:0003700;GO:0005634;GO:0005634;GO:0005634;GO:0006355;GO:0006355;GO:0043565;GO:0043565;	K09419	-	-	106327918	A0A0D3ANT0	HSF
